# Supplementary material for: Invariance-based Mendelian Randomization Method Integrating Multiple Heterogeneous GWAS Summary Datasets
Source: Research Square preprint supplement (doi:10.21203/rs.3.rs-5602368/v1), 2024-12-17
Supplement: Supplementary file 1 [file 09ca0bd9b369ebacec2e4073.docx]

Supplementary Materials

**Content**

[1 Simulation of in Figure 1 2](#_Toc184569665)

[2 UVMR Scenario (a): Correlated and uncorrelated pleiotropy 3](#_Toc184569666)

[2.1 Causal effect is 0 3](#_Toc184569667)

[2.2 Causal effect is 0.1 6](#_Toc184569668)

[3 UVMR Scenario (b): uncorrelated pleiotropy 9](#_Toc184569669)

[3.1 Causal effect is 0 9](#_Toc184569670)

[3.2 Causal effect is 0.1 10](#_Toc184569671)

[4 UVMR Scenario (c): No pleiotropy 11](#_Toc184569672)

[4.1 Causal effect is 0 11](#_Toc184569673)

[4.2 Causal effect is 0.1 12](#_Toc184569674)

[5 MVMR Scenario (a): Correlated and uncorrelated pleiotropy 13](#_Toc184569675)

[5.1 Performance of causal effect estimation 13](#_Toc184569676)

[5.2 Measurement of heterogeneity between datasets 15](#_Toc184569677)

[6 MVMR Scenario (b): Uncorrelated pleiotropy 17](#_Toc184569678)

[6.1 Performance of causal effect estimation 17](#_Toc184569679)

[6.2 Measurement of heterogeneity between datasets 18](#_Toc184569680)

[7 MVMR Scenario (c): No pleiotropy 20](#_Toc184569681)

[7.1 Performance of causal effect estimation 20](#_Toc184569682)

[7.2 Measurement of heterogeneity between datasets 21](#_Toc184569683)

[8 Application 23](#_Toc184569684)

[9 Hyper parameters 24](#_Toc184569685)

[9.1 Scenario (a): Correlated and uncorrelated pleiotropy 27](#_Toc184569686)

[9.2 Scenario (b): uncorrelated pleiotropy 28](#_Toc184569687)

[9.3 Scenario (c): No pleiotropy 30](#_Toc184569688)

# 1 Simulation of in Figure 1


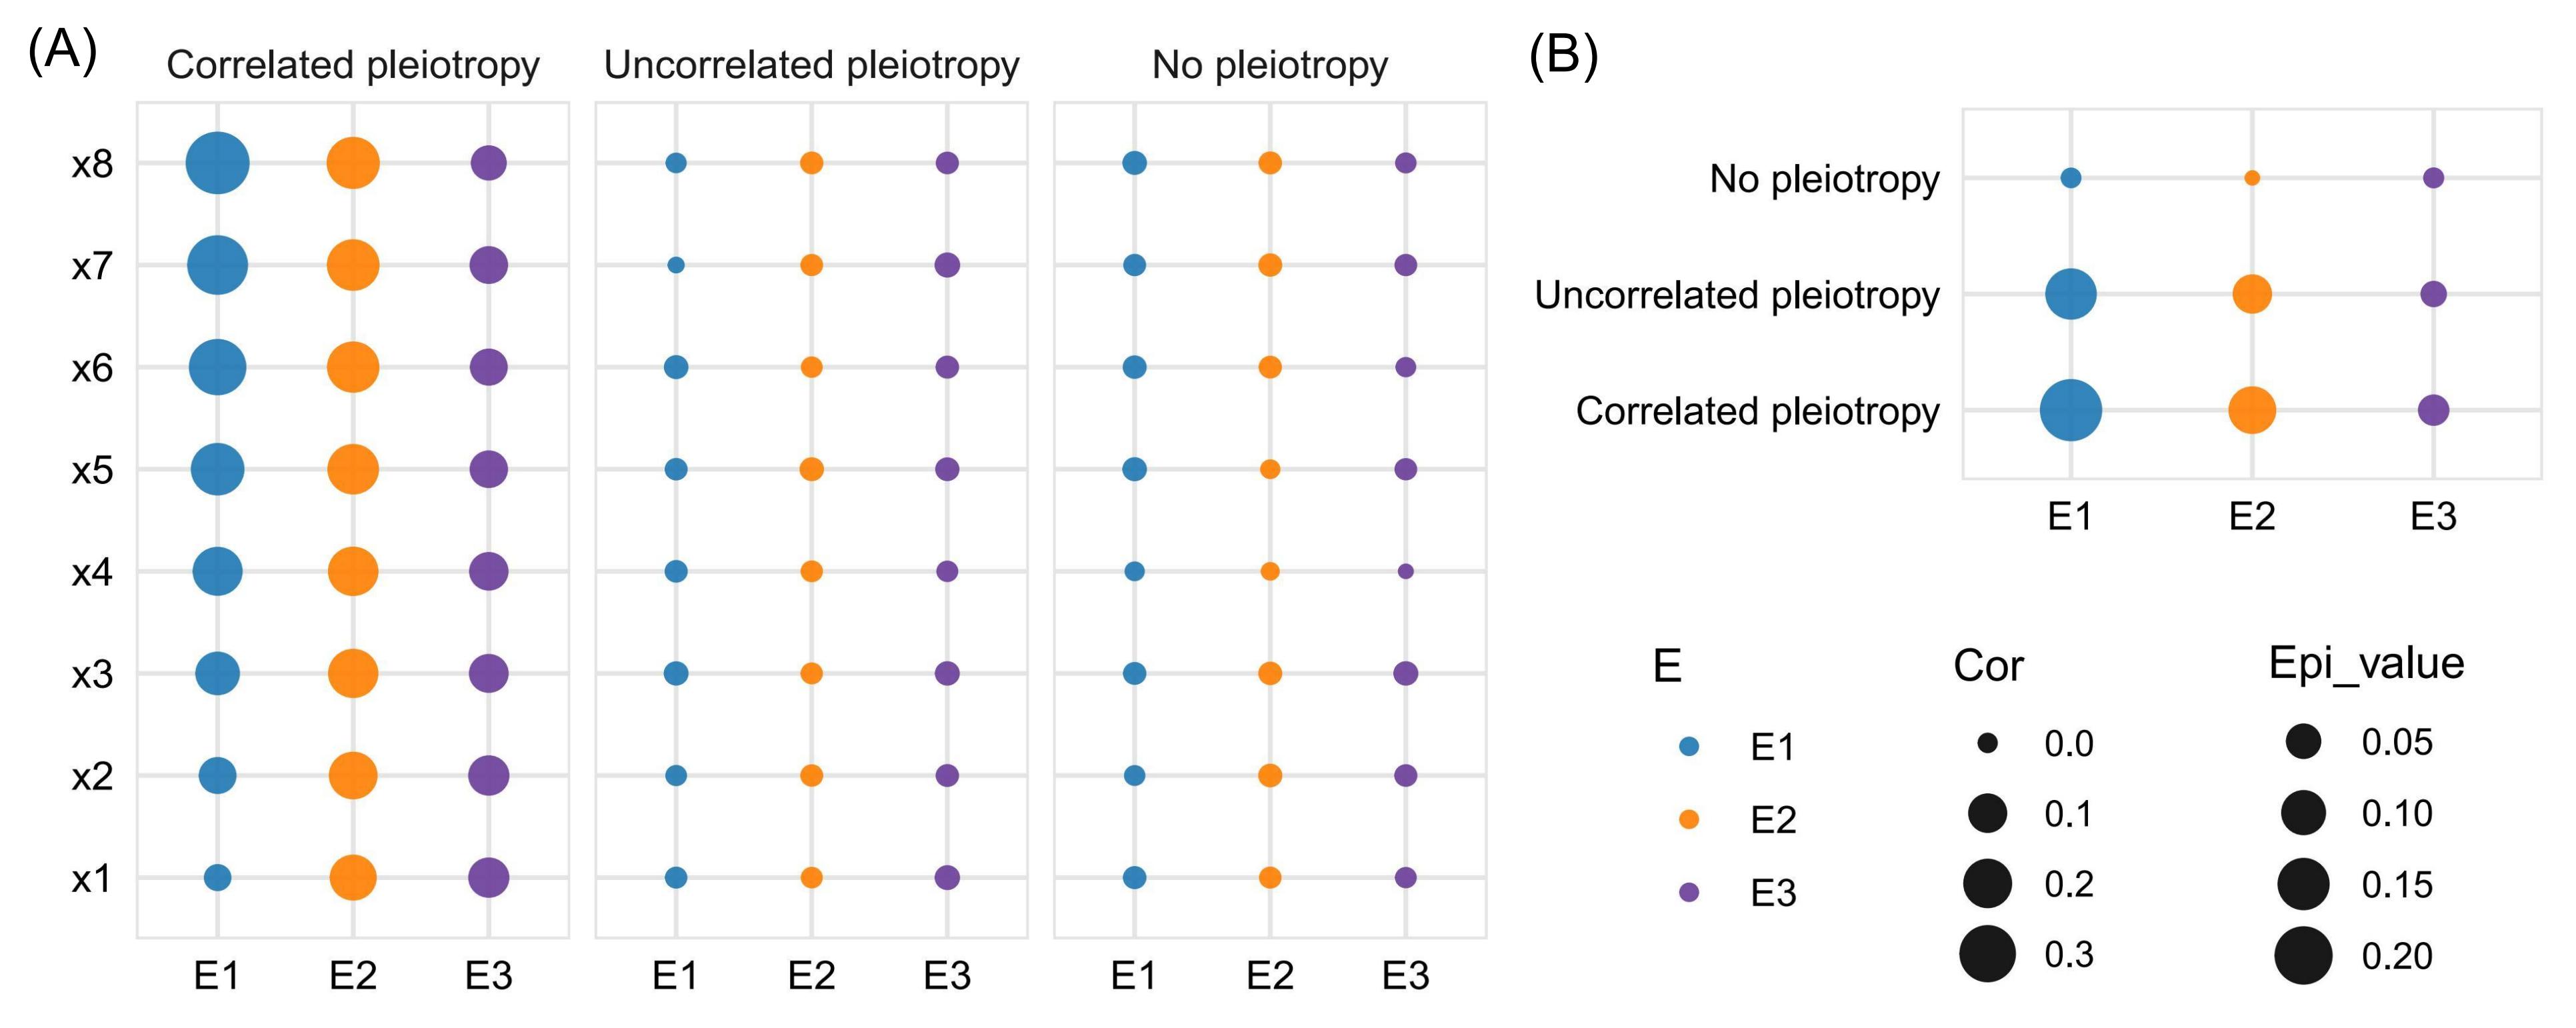


### Figure S1. (A) The pearson's product moment correlation coefficient of 和; (B) The mean of absolute value of .

**Parameters’ setting:**

E=3;

P=8 variables;

total 100 IVs, 30% IVs have correlated or uncorrelated pleiotropy;

correlated pleiotropy, ,,;

uncorrelated pleiotropy, ,,;

,,;

,,;

Other parameters’ settings are the same as that in section simulation.

# 2 UVMR Scenario (a): Correlated and uncorrelated pleiotropy

## 2.1 Causal effect is 0


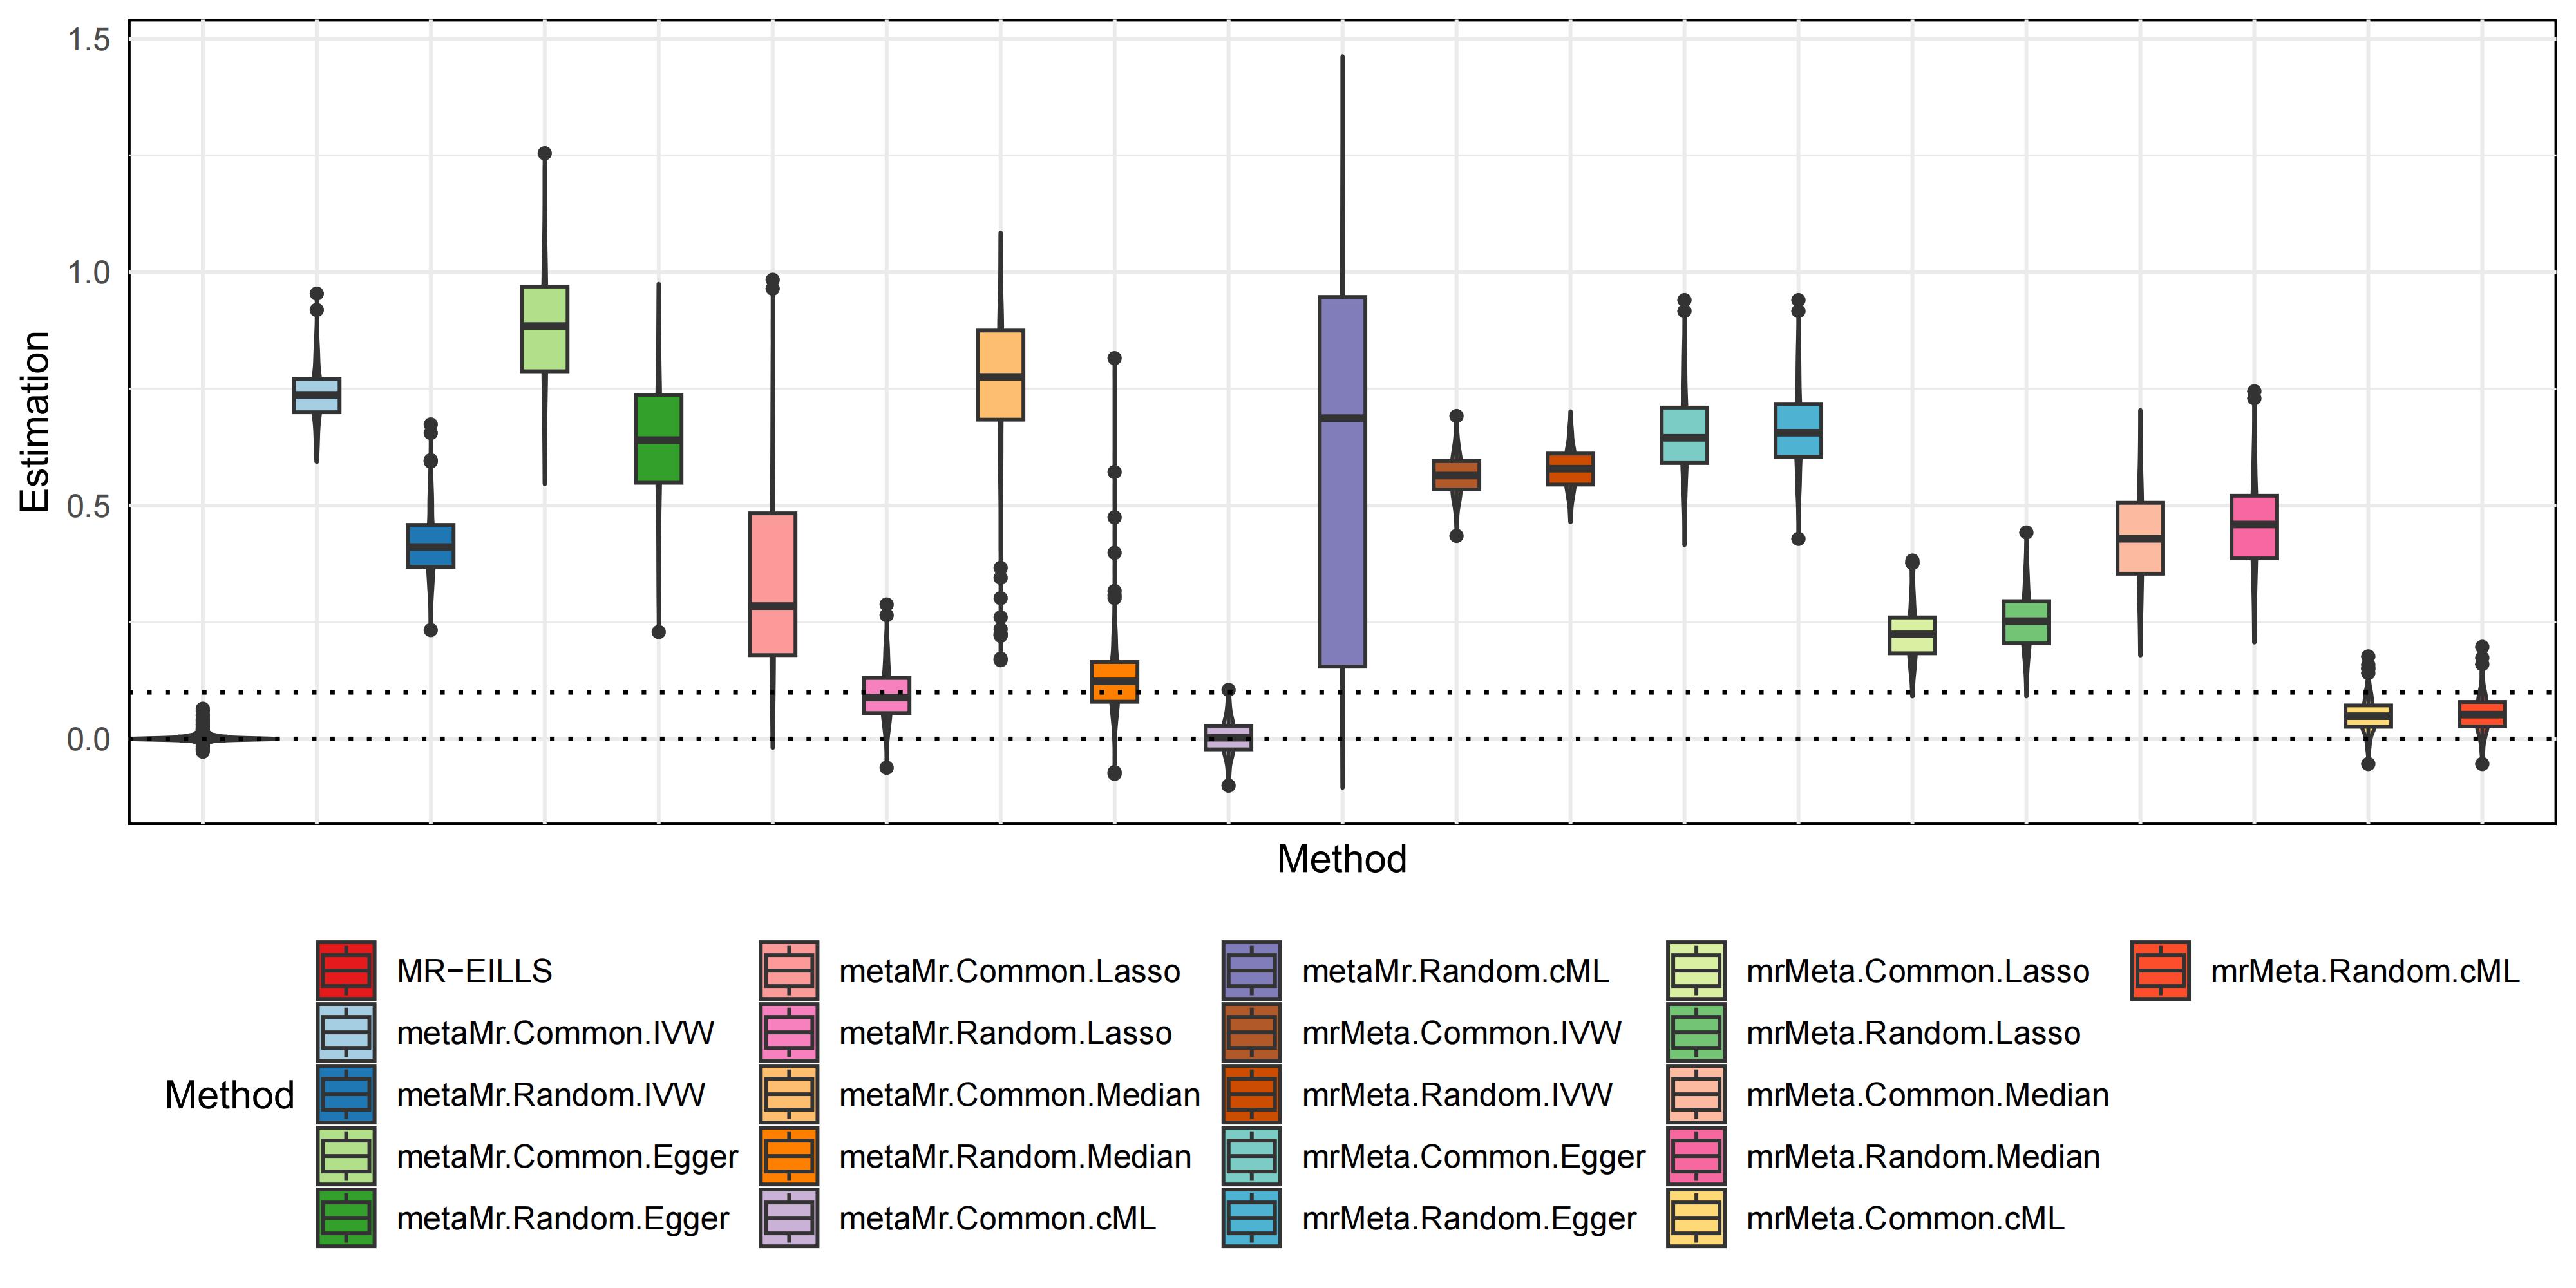


### Figure S2. Causal effects’ estimation when g=100, E=3, P=1, proportion of invalid IVs is 30%


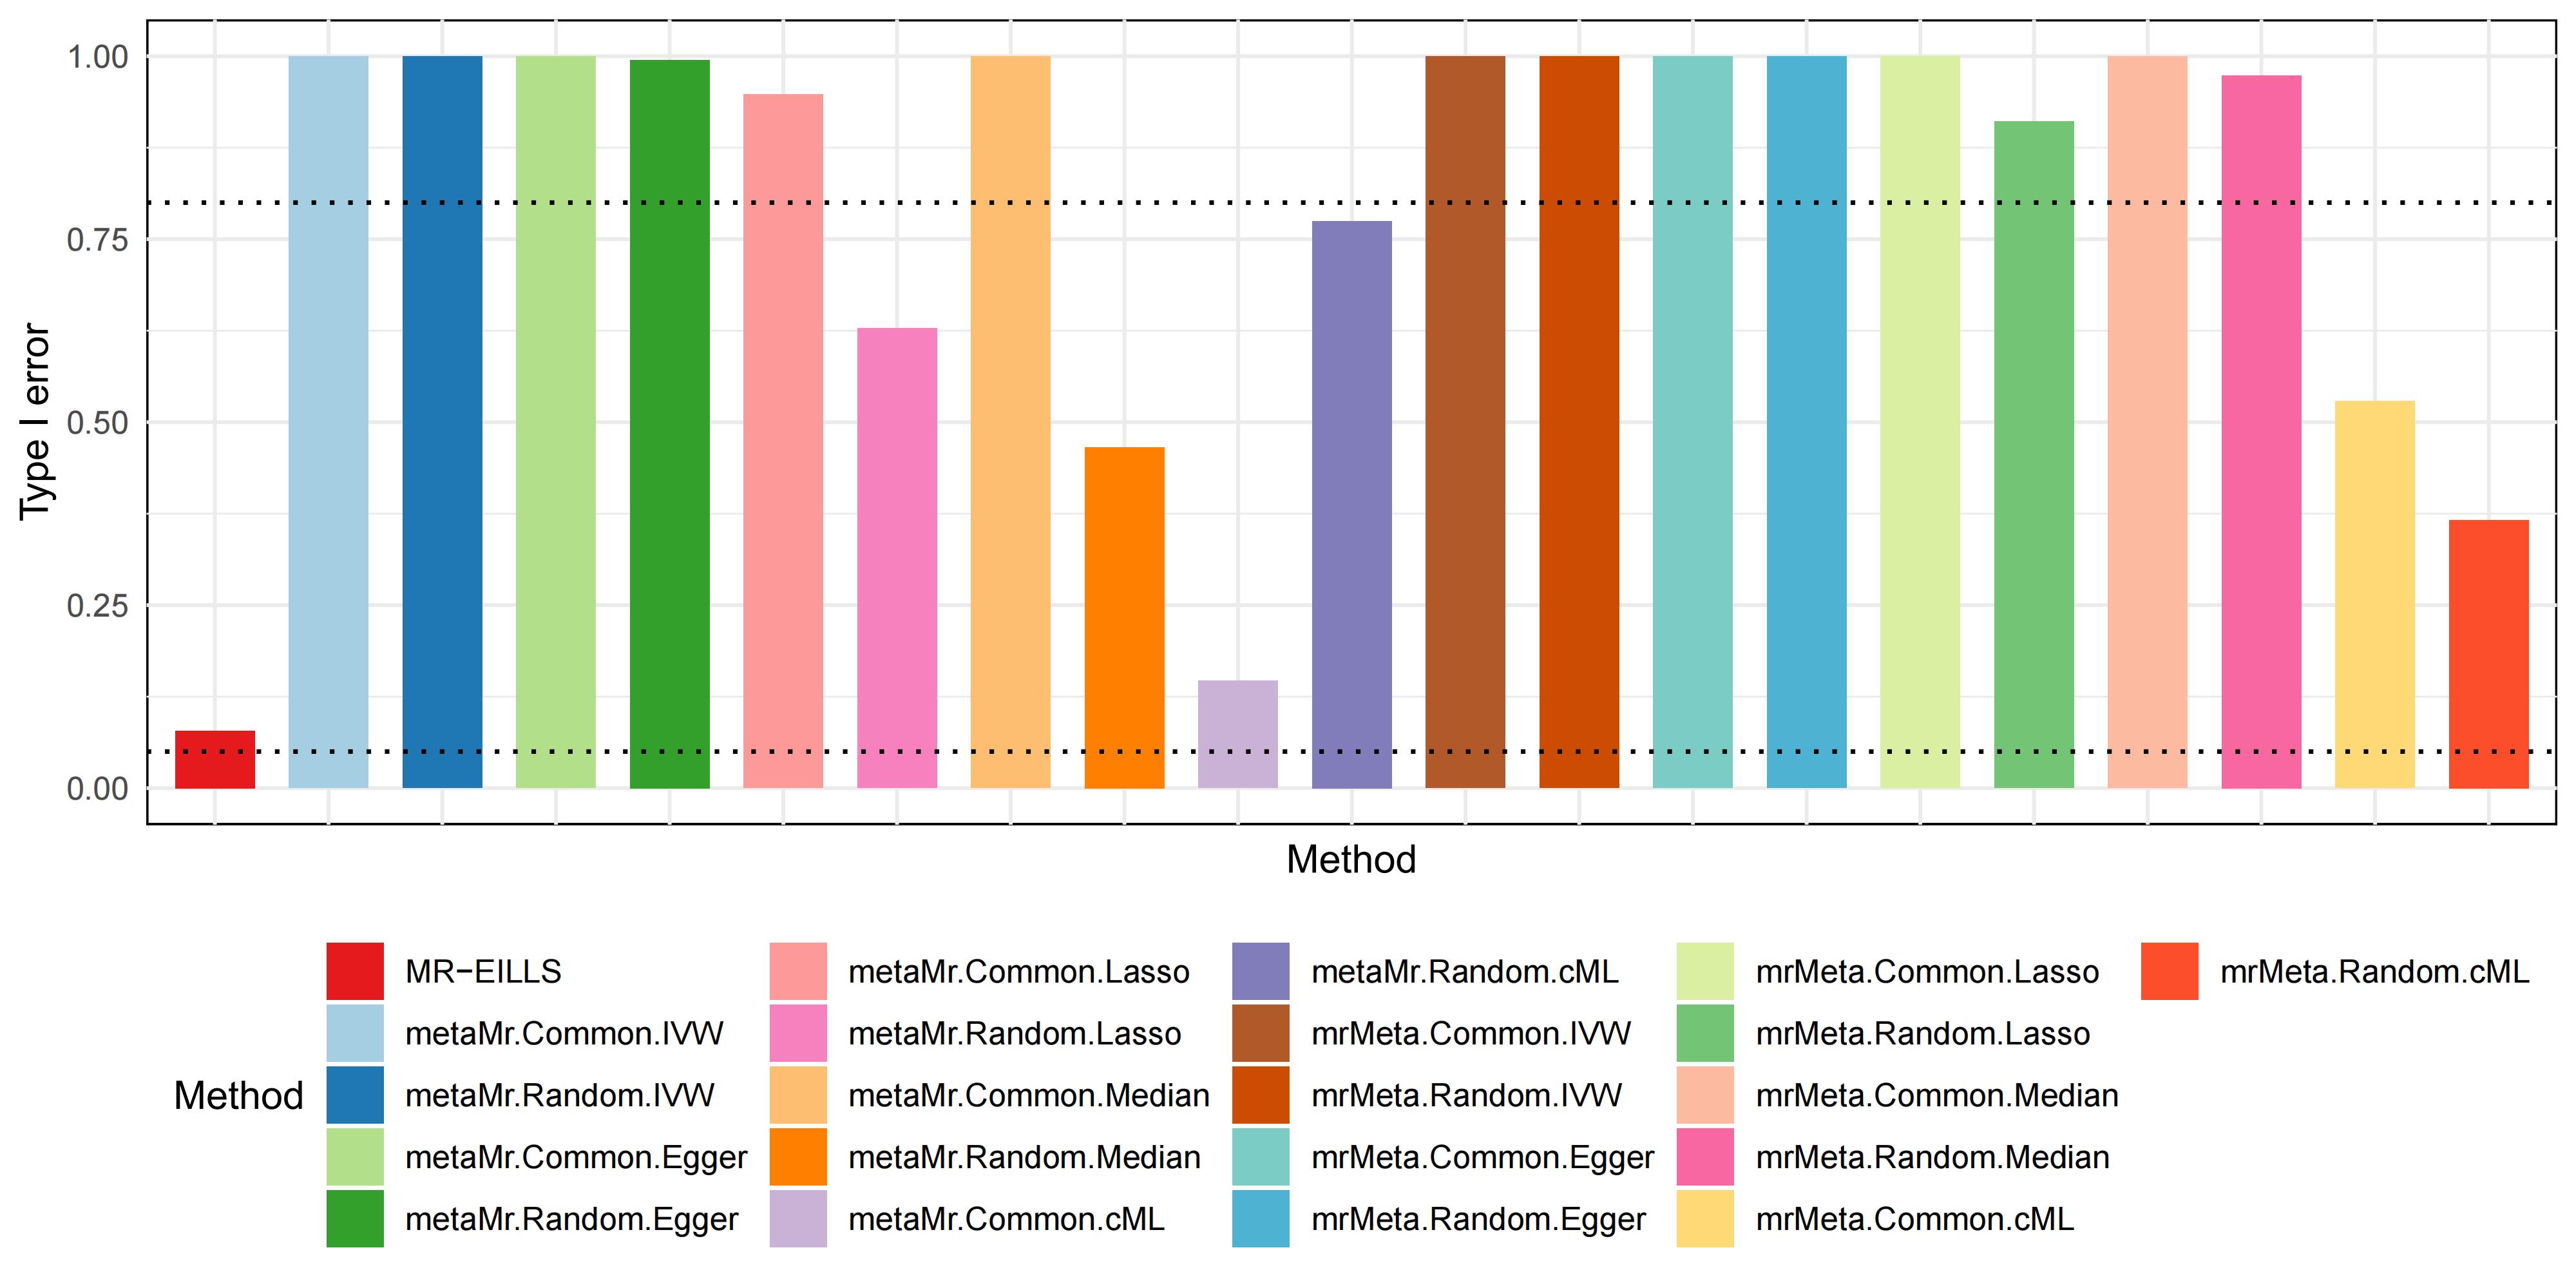


### Figure S3. Type I error of causal effects’ estimation when g=100, E=3, P=1, proportion of invalid IVs is 30%


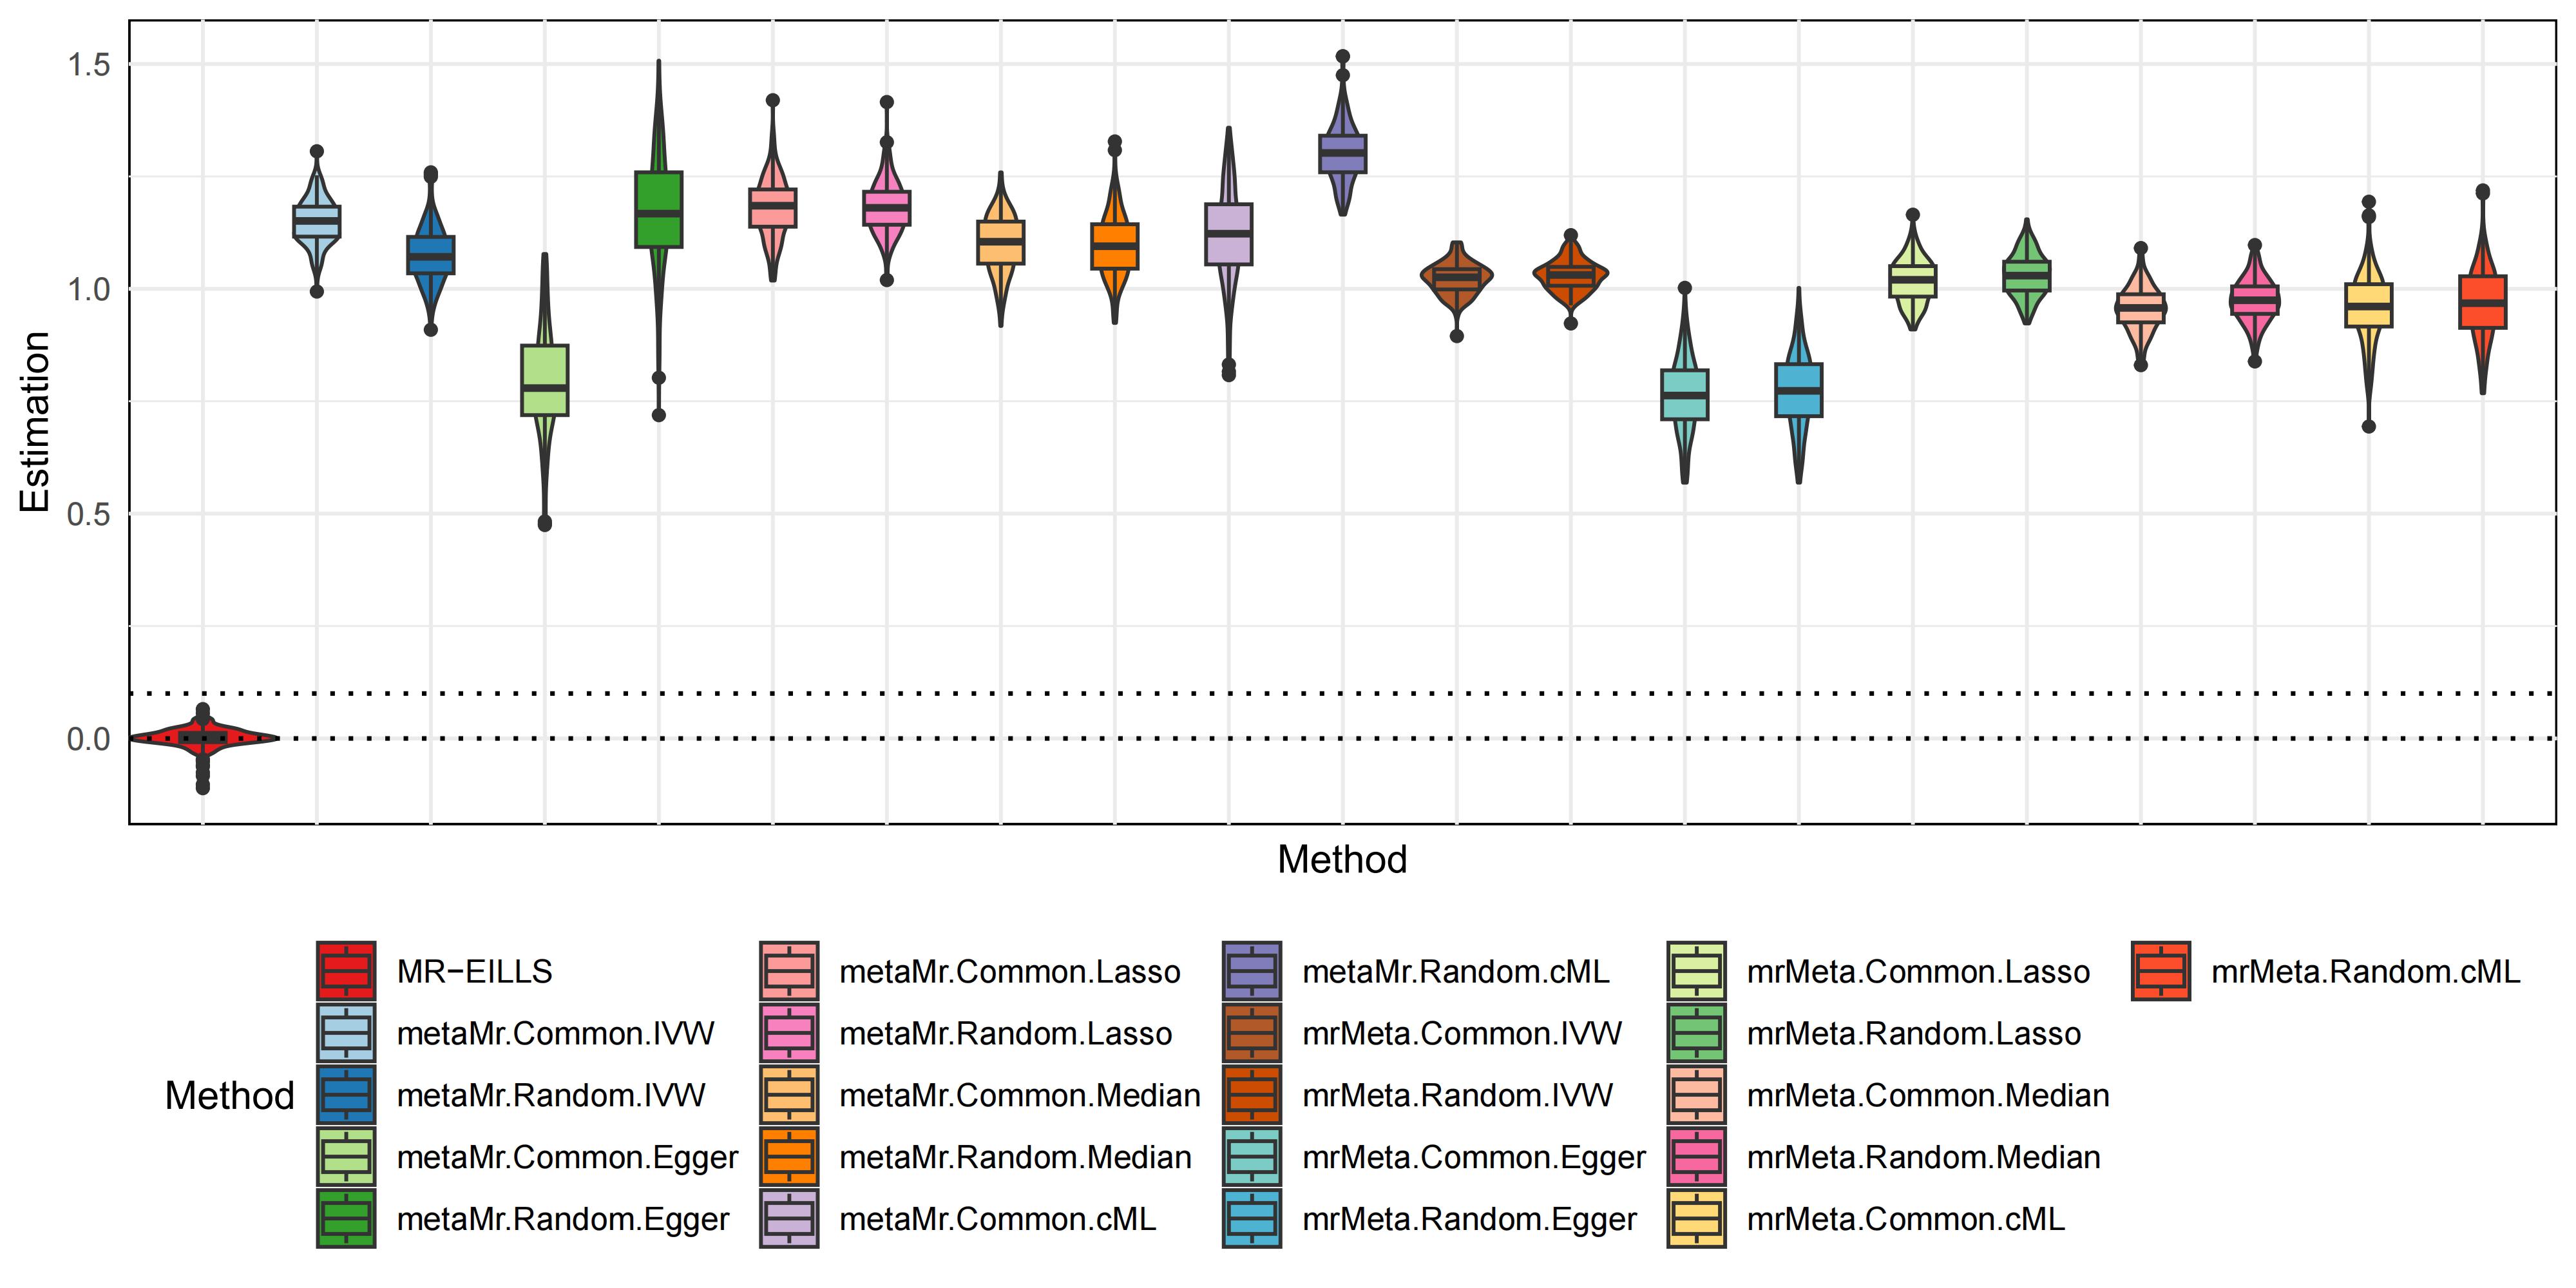


### Figure S4. Causal effects’ estimation when g=100, E=3, P=1, proportion of invalid IVs is 80%


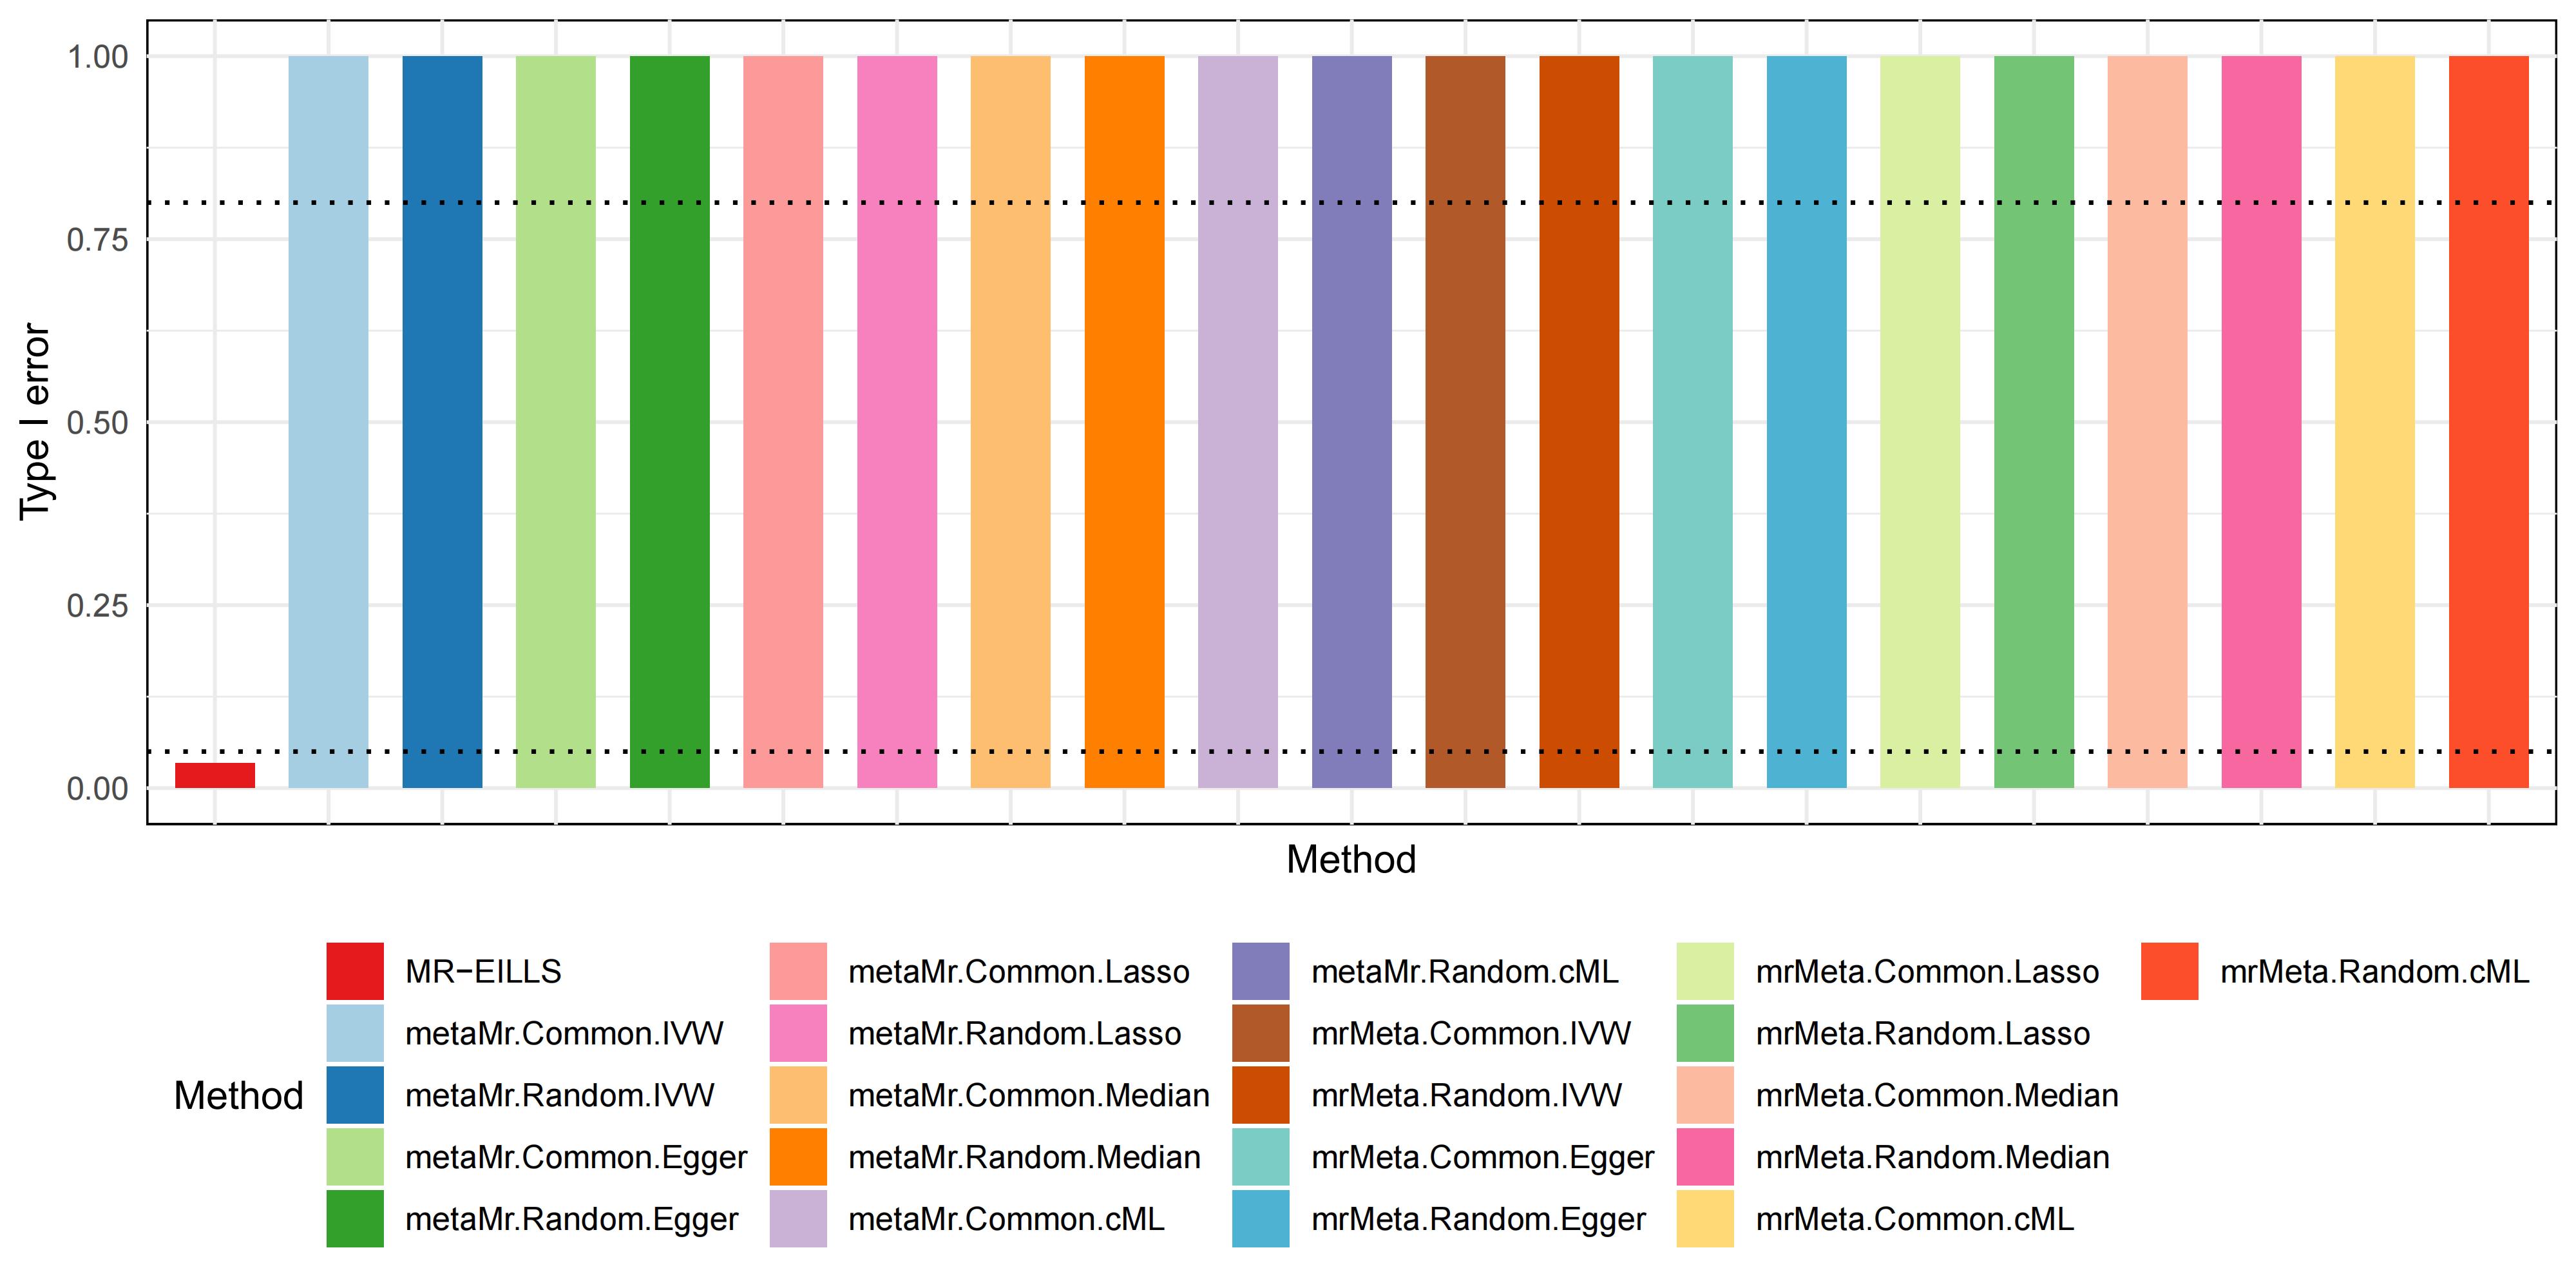


### Figure S5. Type I error of causal effects’ estimation when g=100, E=3, P=1, proportion of invalid IVs is 80%


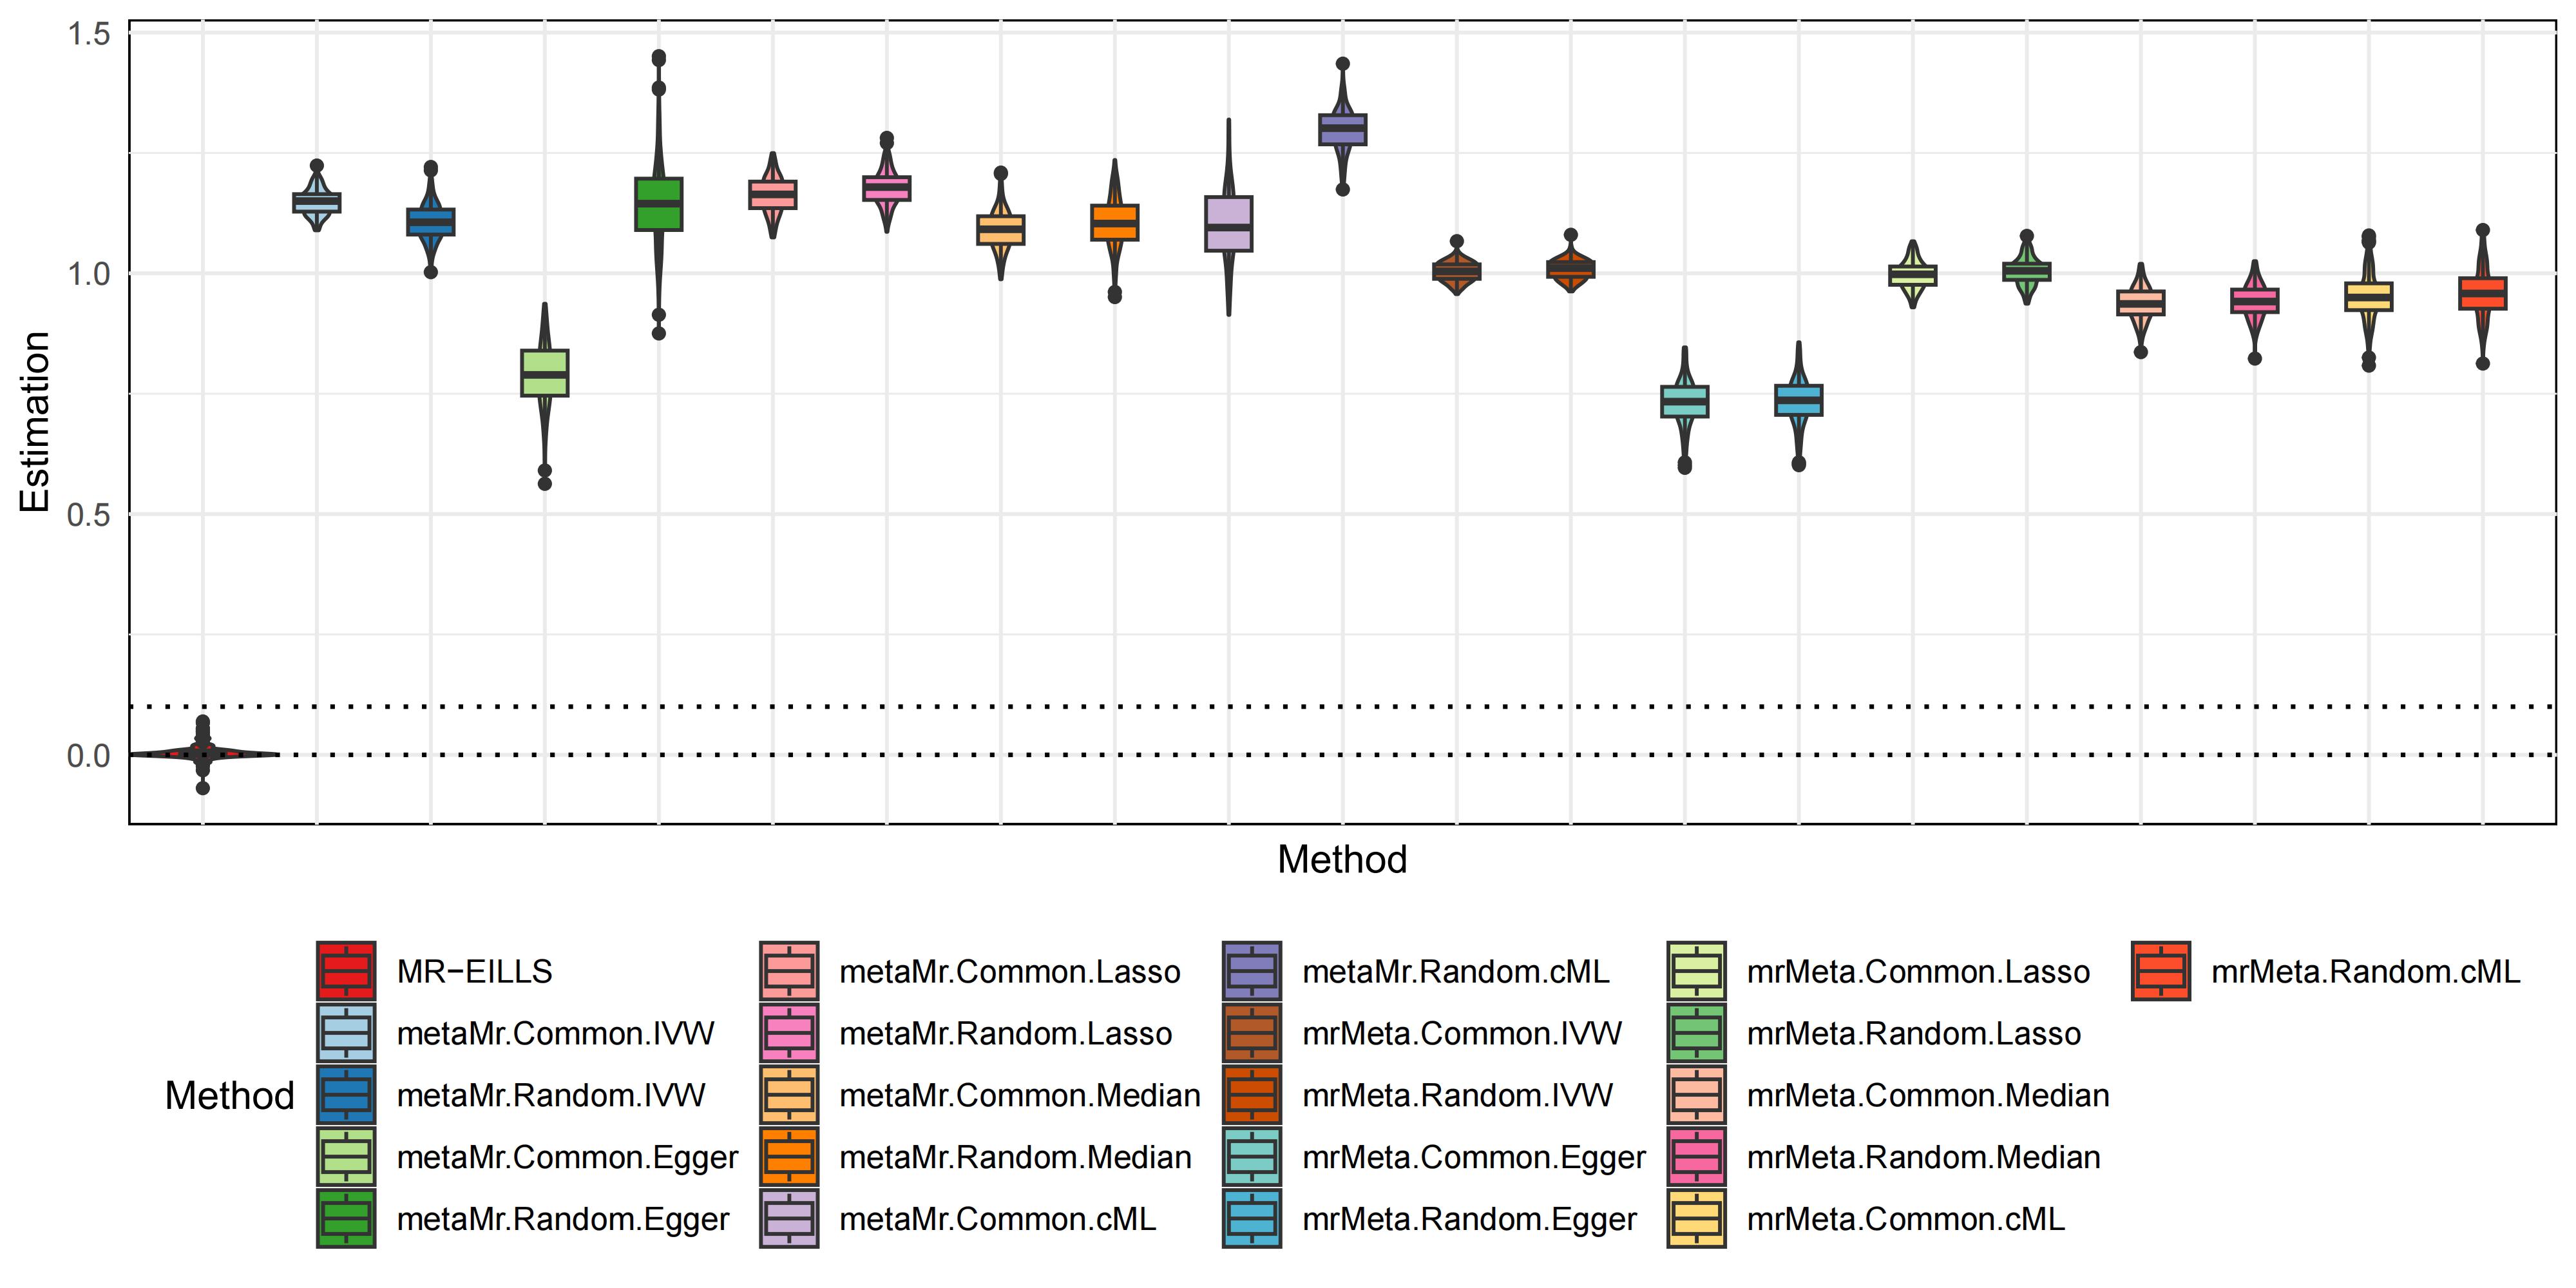


### Figure S6. Causal effects’ estimation when g=300, E=3, P=1, proportion of invalid IVs is 80%


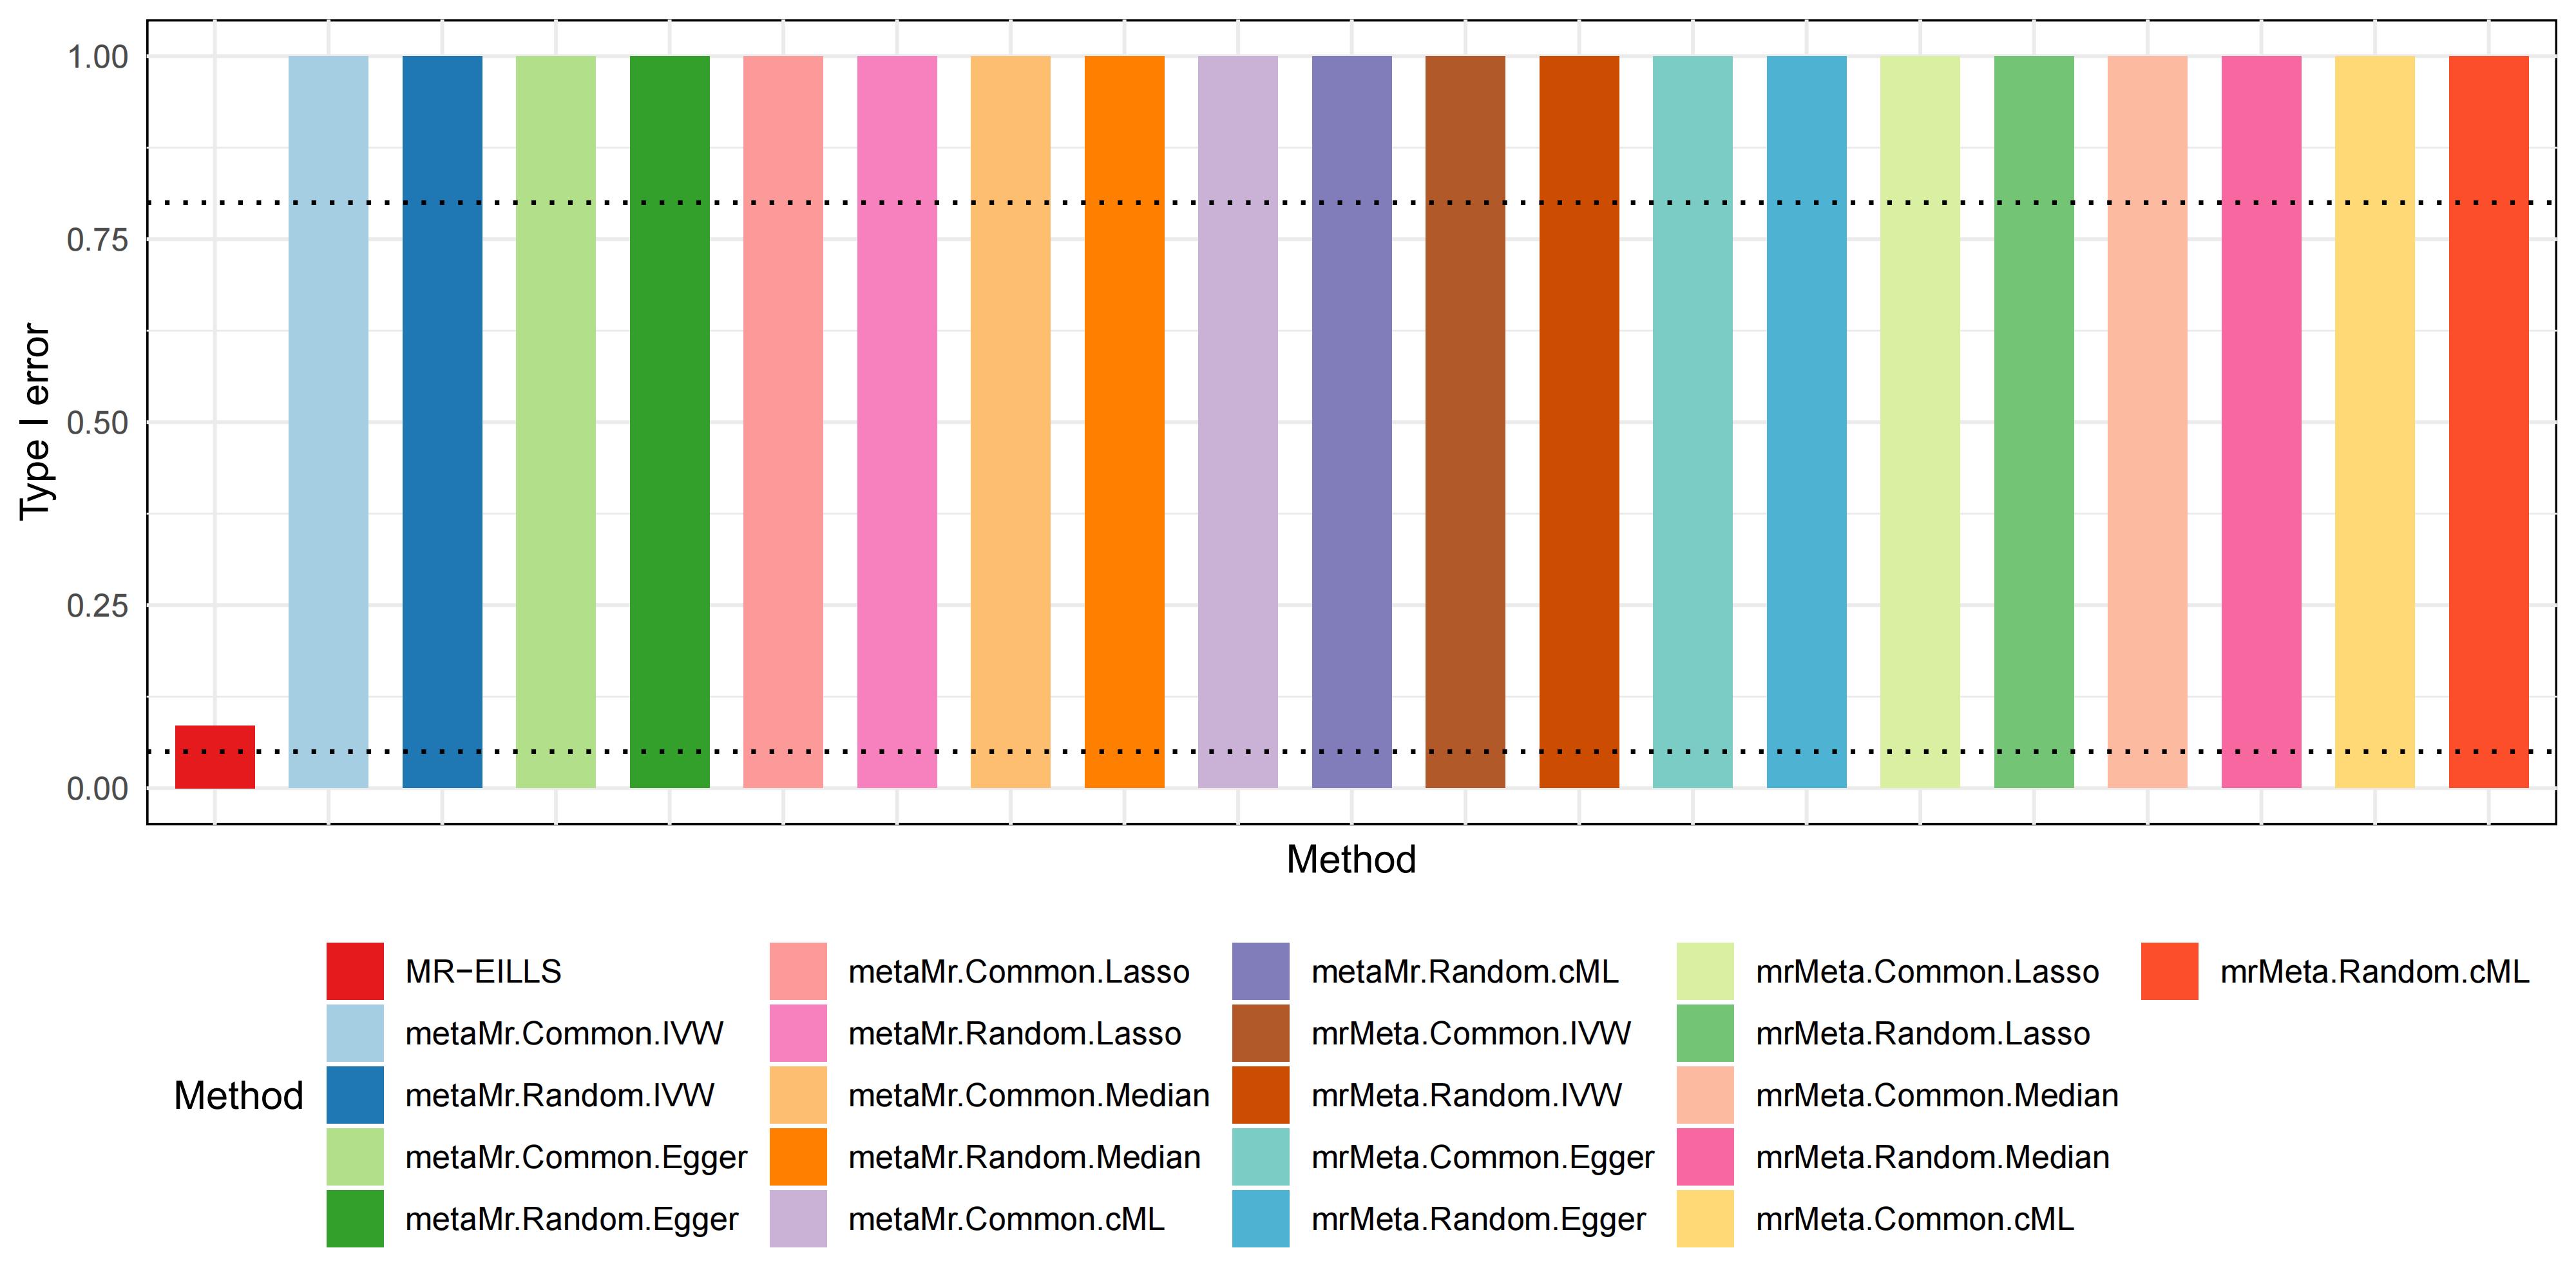


### Figure S7. Type I error of causal effects’ estimation when g=300, E=3, P=1, proportion of invalid IVs is 80%

## 2.2 Causal effect is 0.1


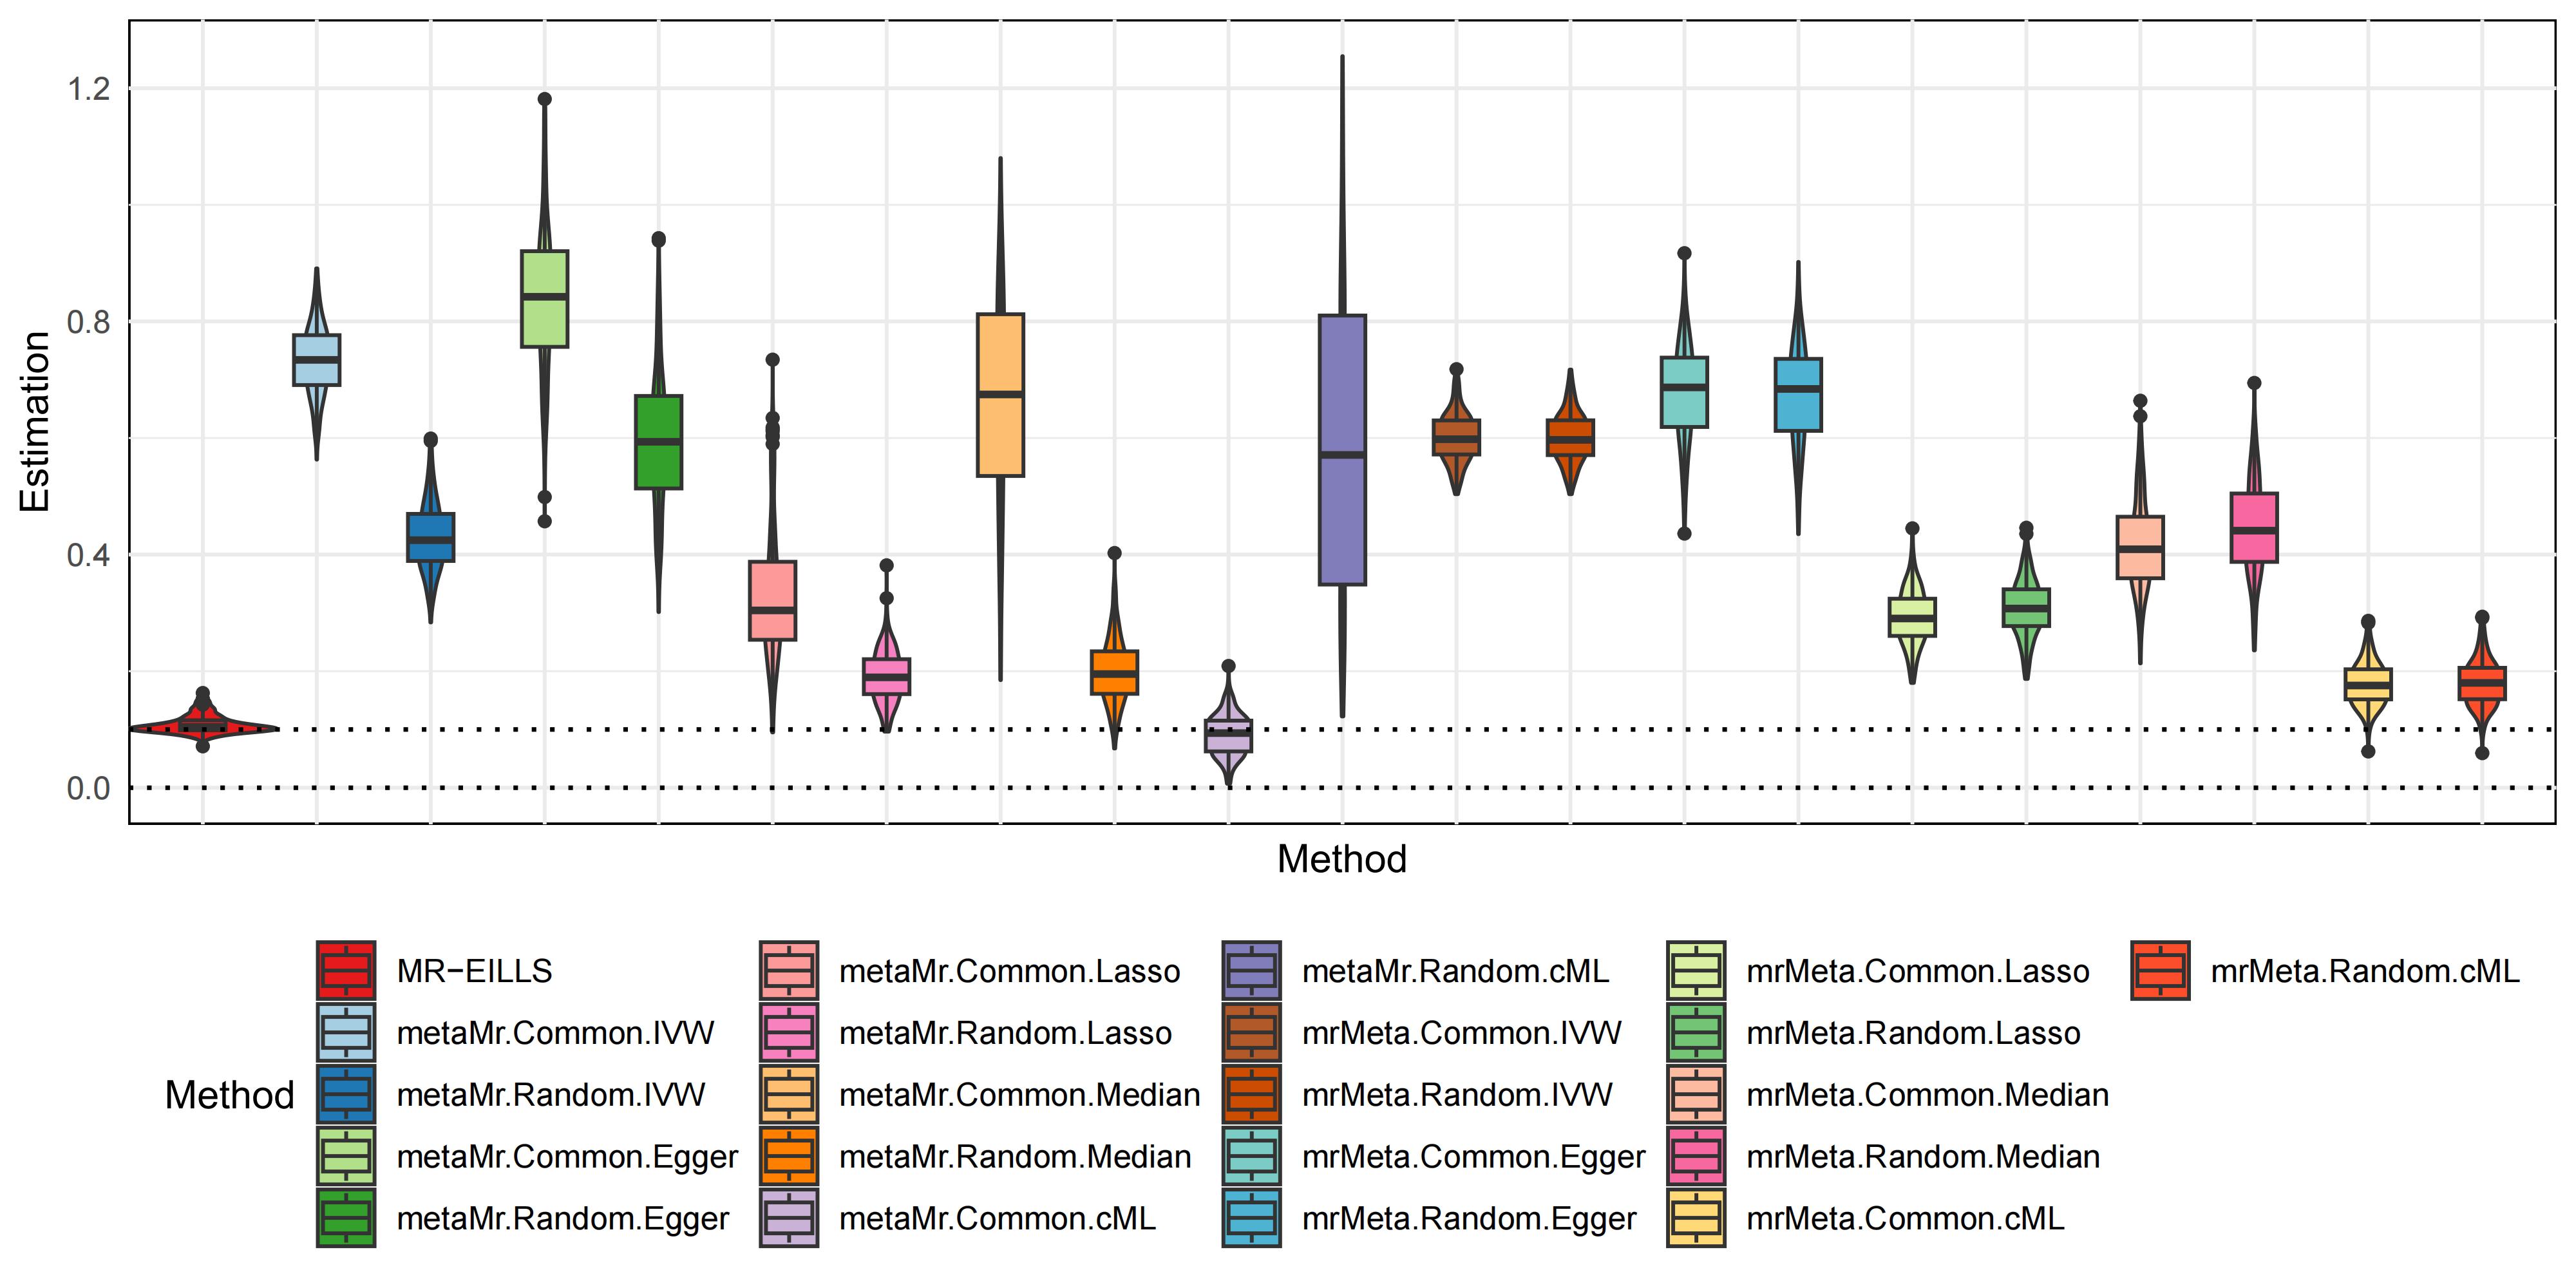


### Figure S8. Causal effects’ estimation when g=100, E=3, P=1, proportion of invalid IVs is 30%


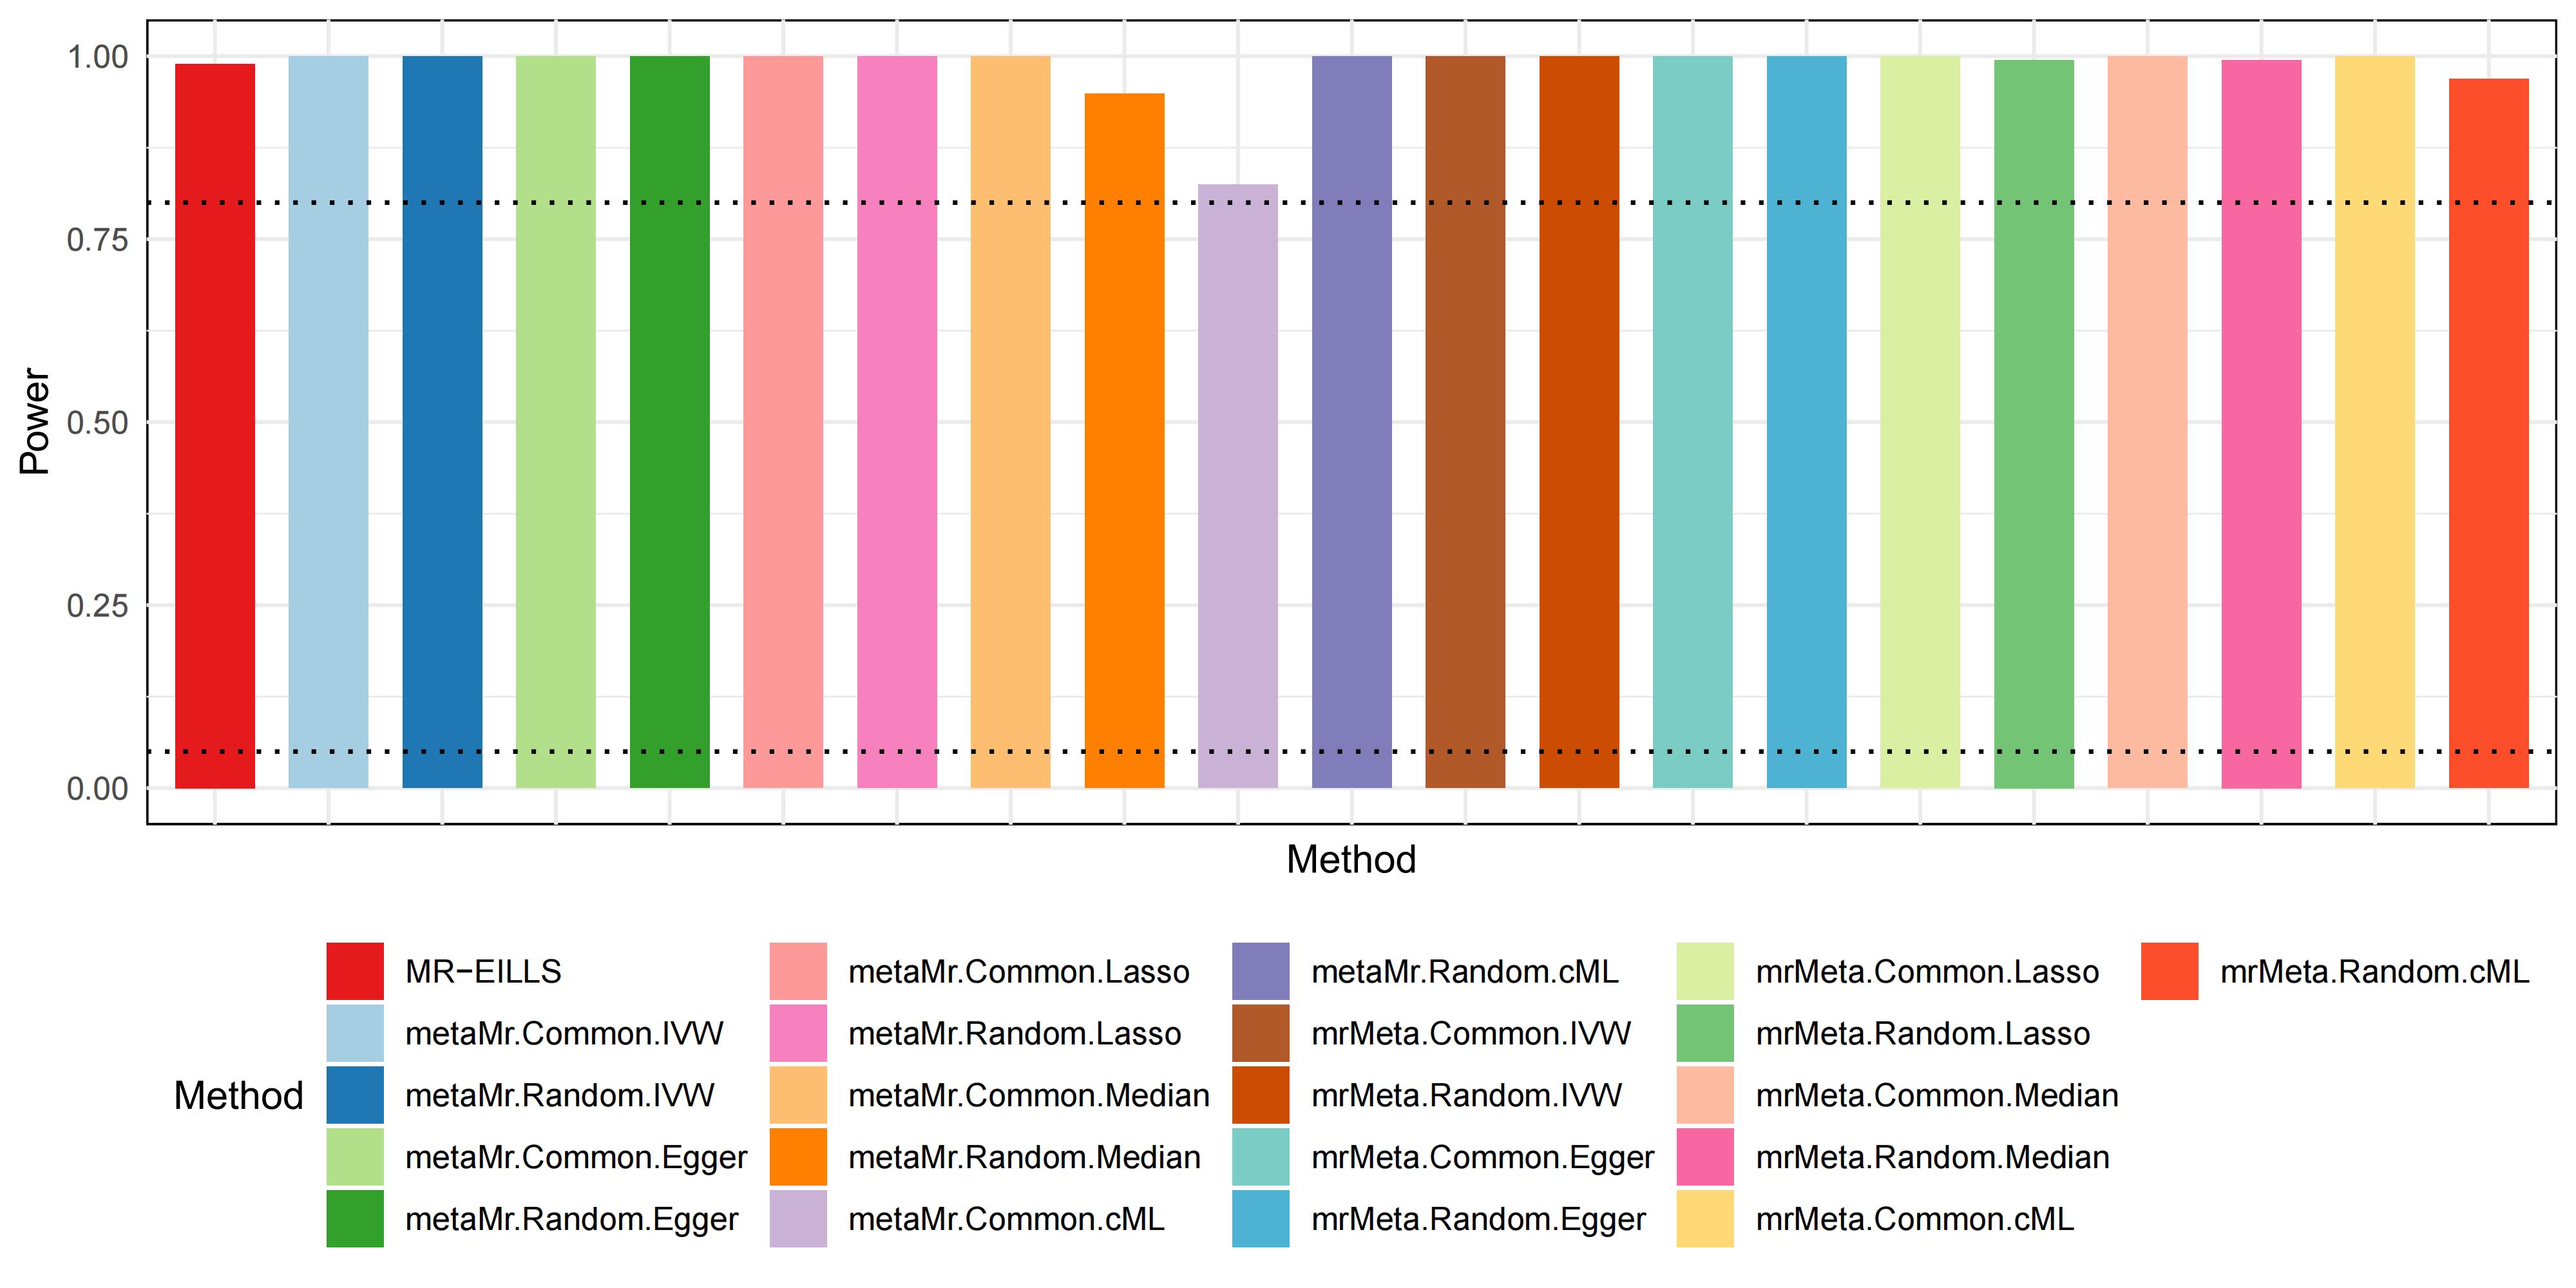


### Figure S9. Statistical Power of causal effects’ estimation when g=100, E=3, P=1, proportion of invalid IVs is 30%


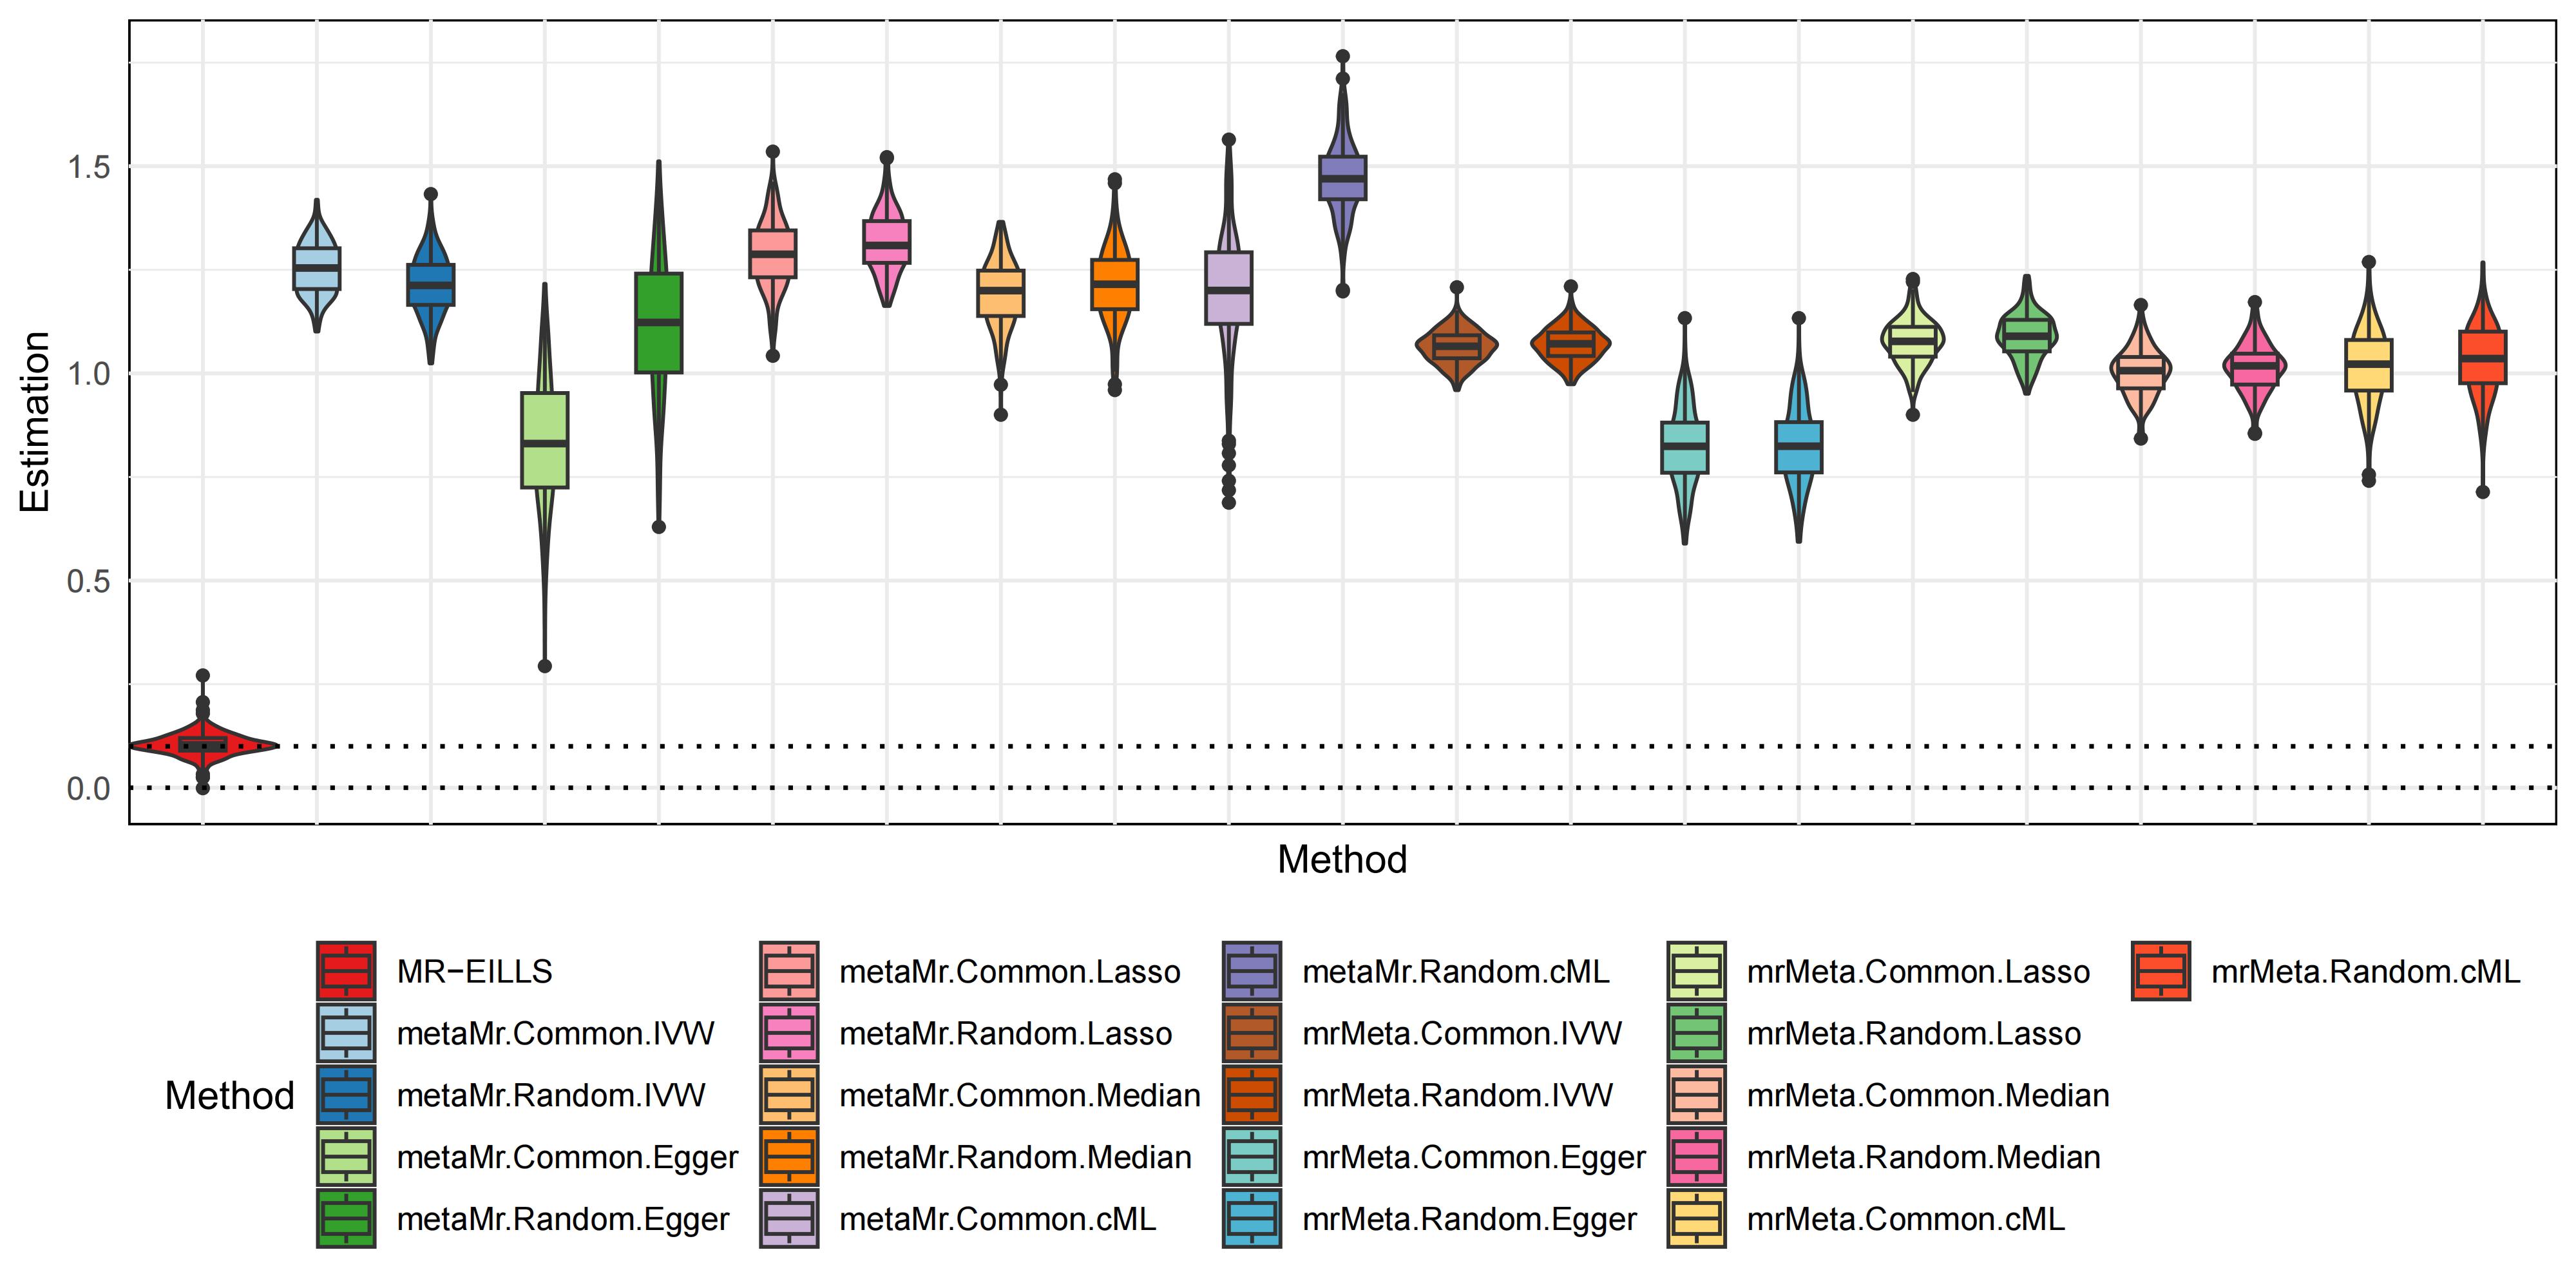


### Figure S10. Causal effects’ estimation when g=100, E=3, P=1, proportion of invalid IVs is 80%


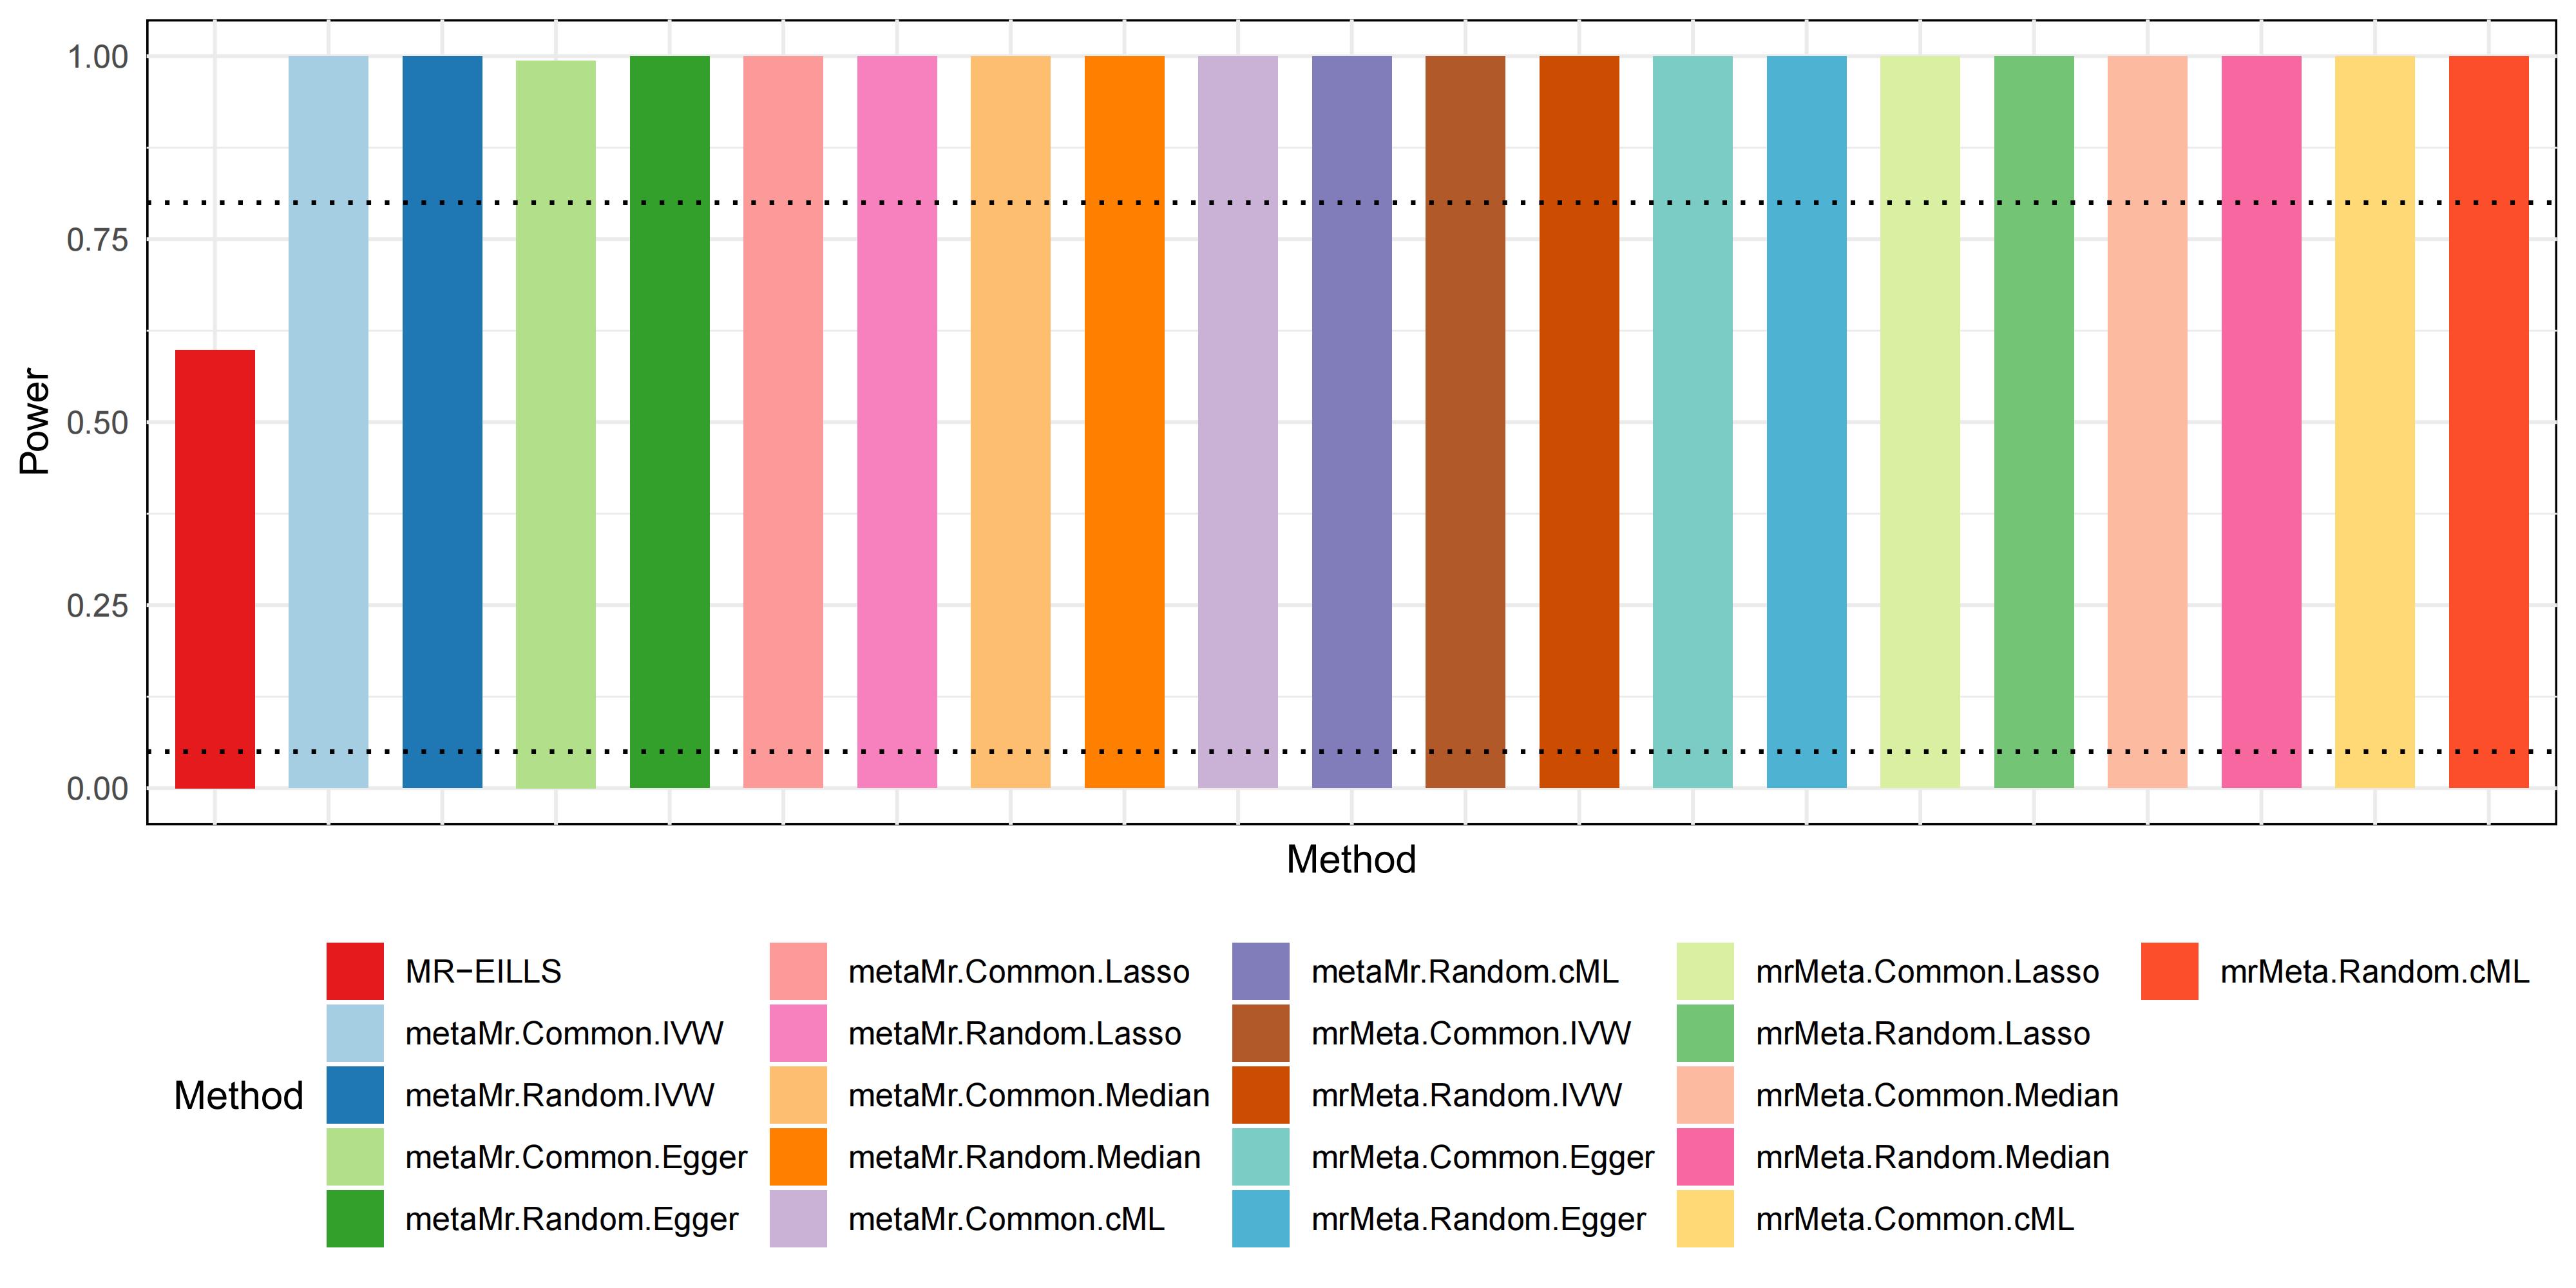


### Figure S11. Statistical Power of causal effects’ estimation when g=100, E=3, P=1, proportion of invalid IVs is 80%


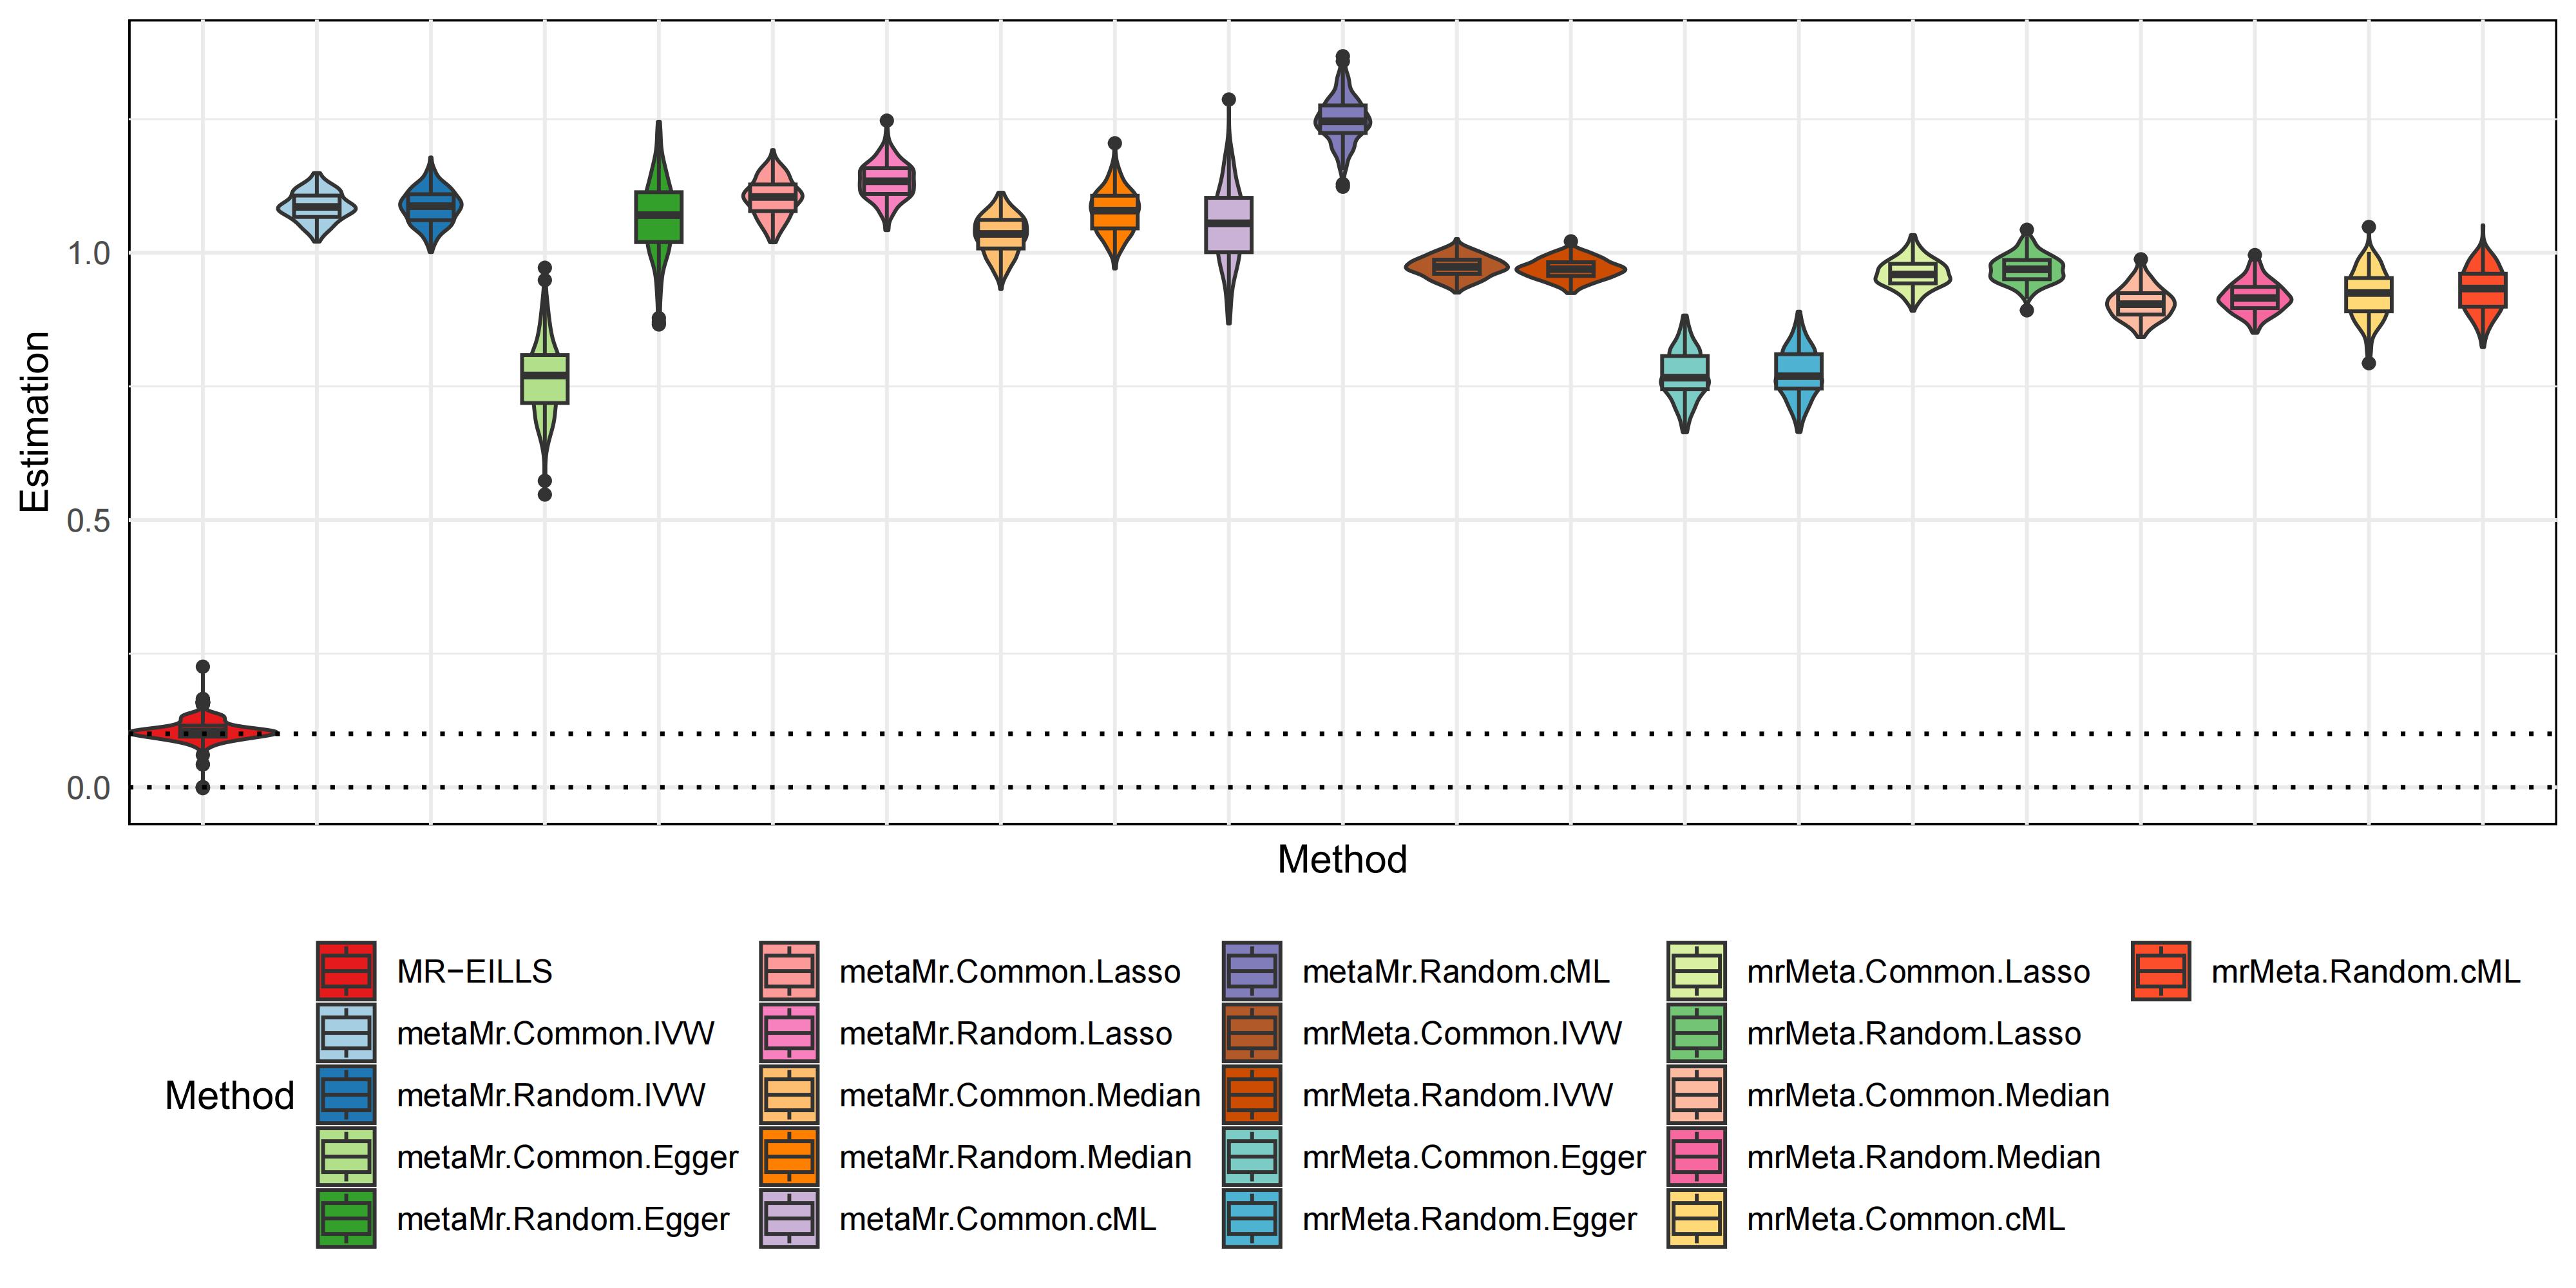


### Figure S12. Causal effects’ estimation when g=300, E=3, P=1, proportion of invalid IVs is 80%


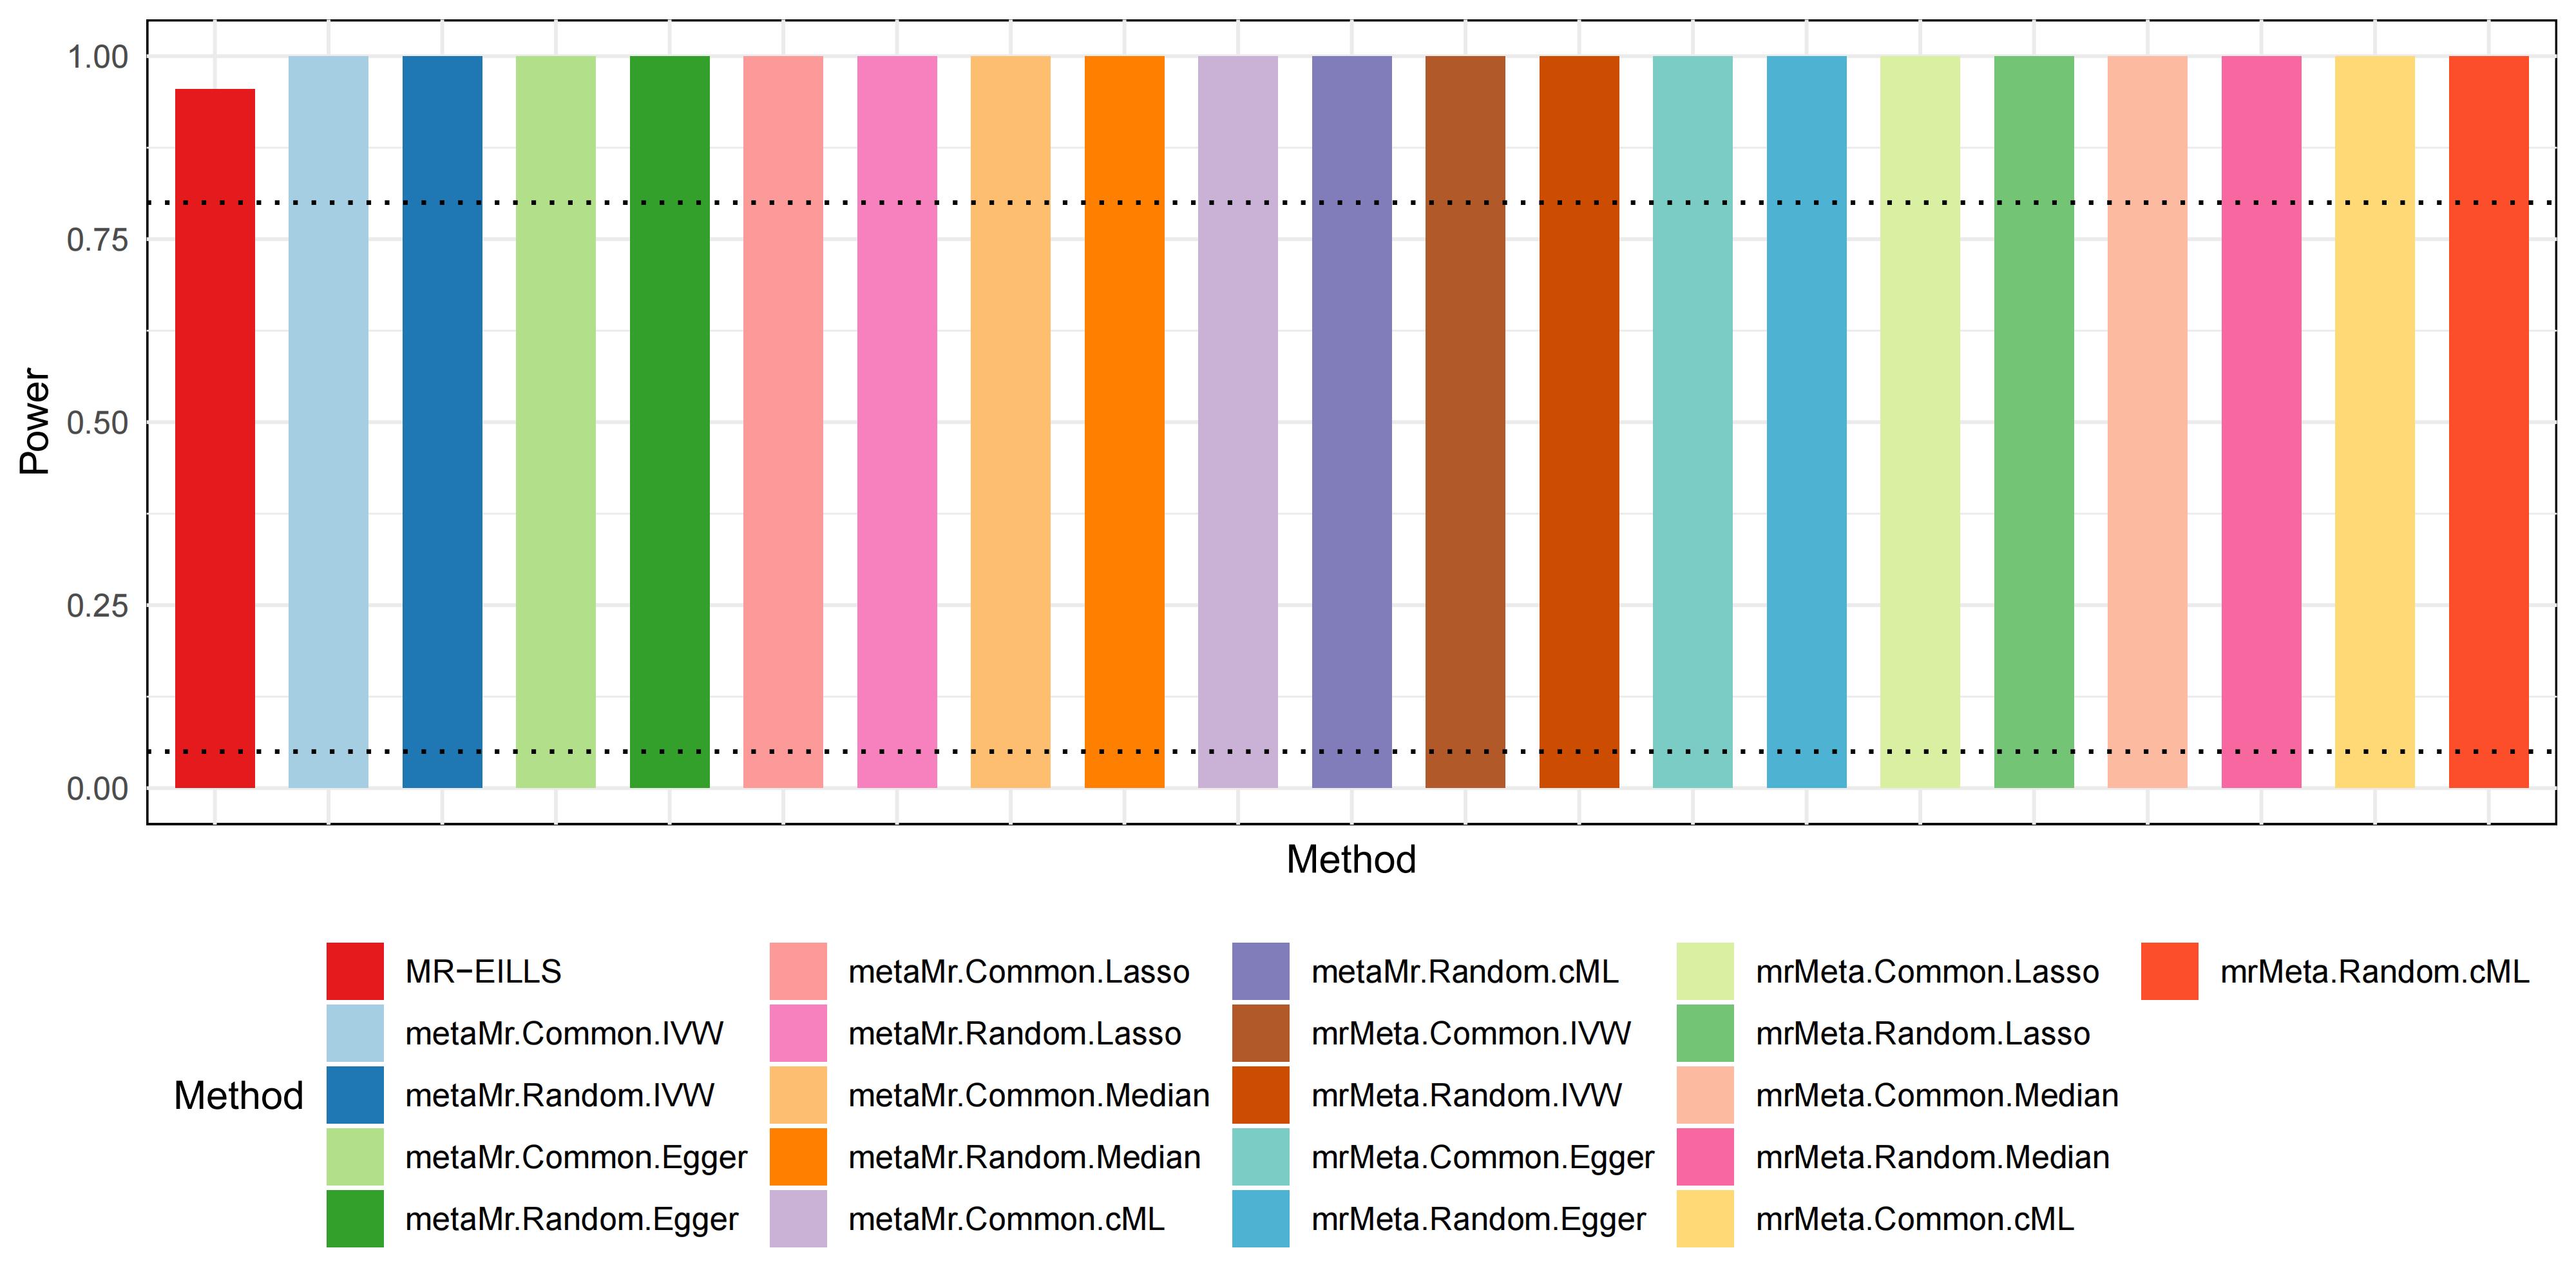


### Figure S13. Statistical Power of causal effects’ estimation when g=300, E=3, P=1, proportion of invalid IVs is 80%

# 3 UVMR Scenario (b): uncorrelated pleiotropy

## 3.1 Causal effect is 0


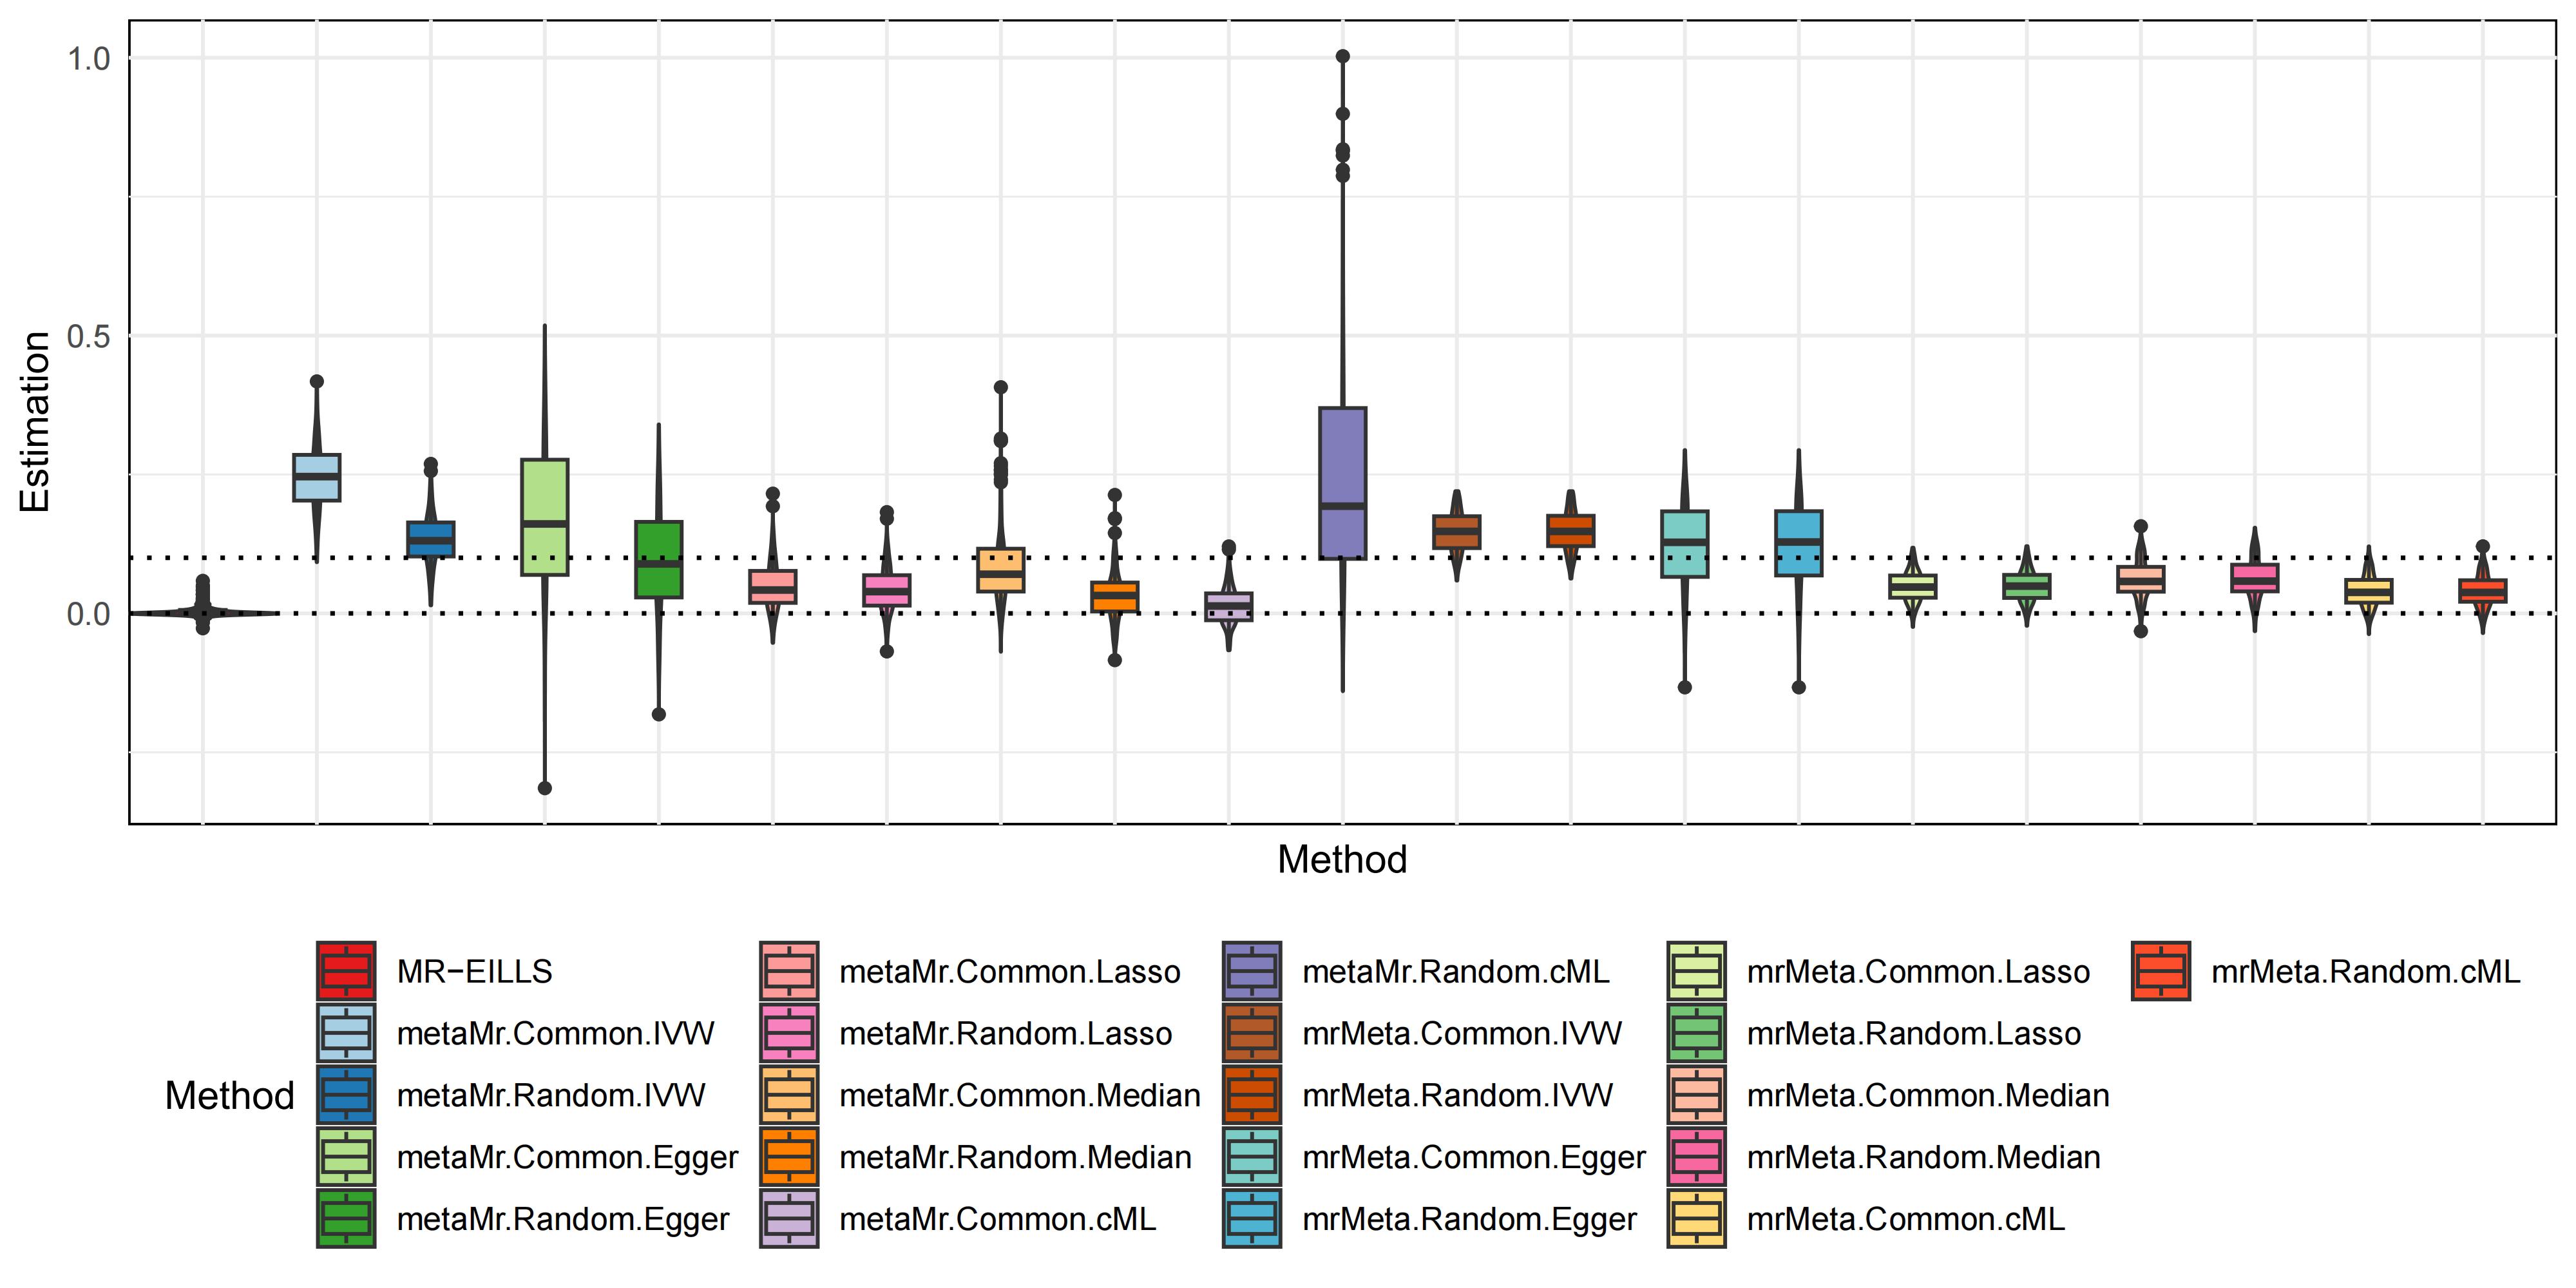


### Figure S14. Causal effects’ estimation when g=100, E=3, P=1, proportion of invalid IVs is 30%


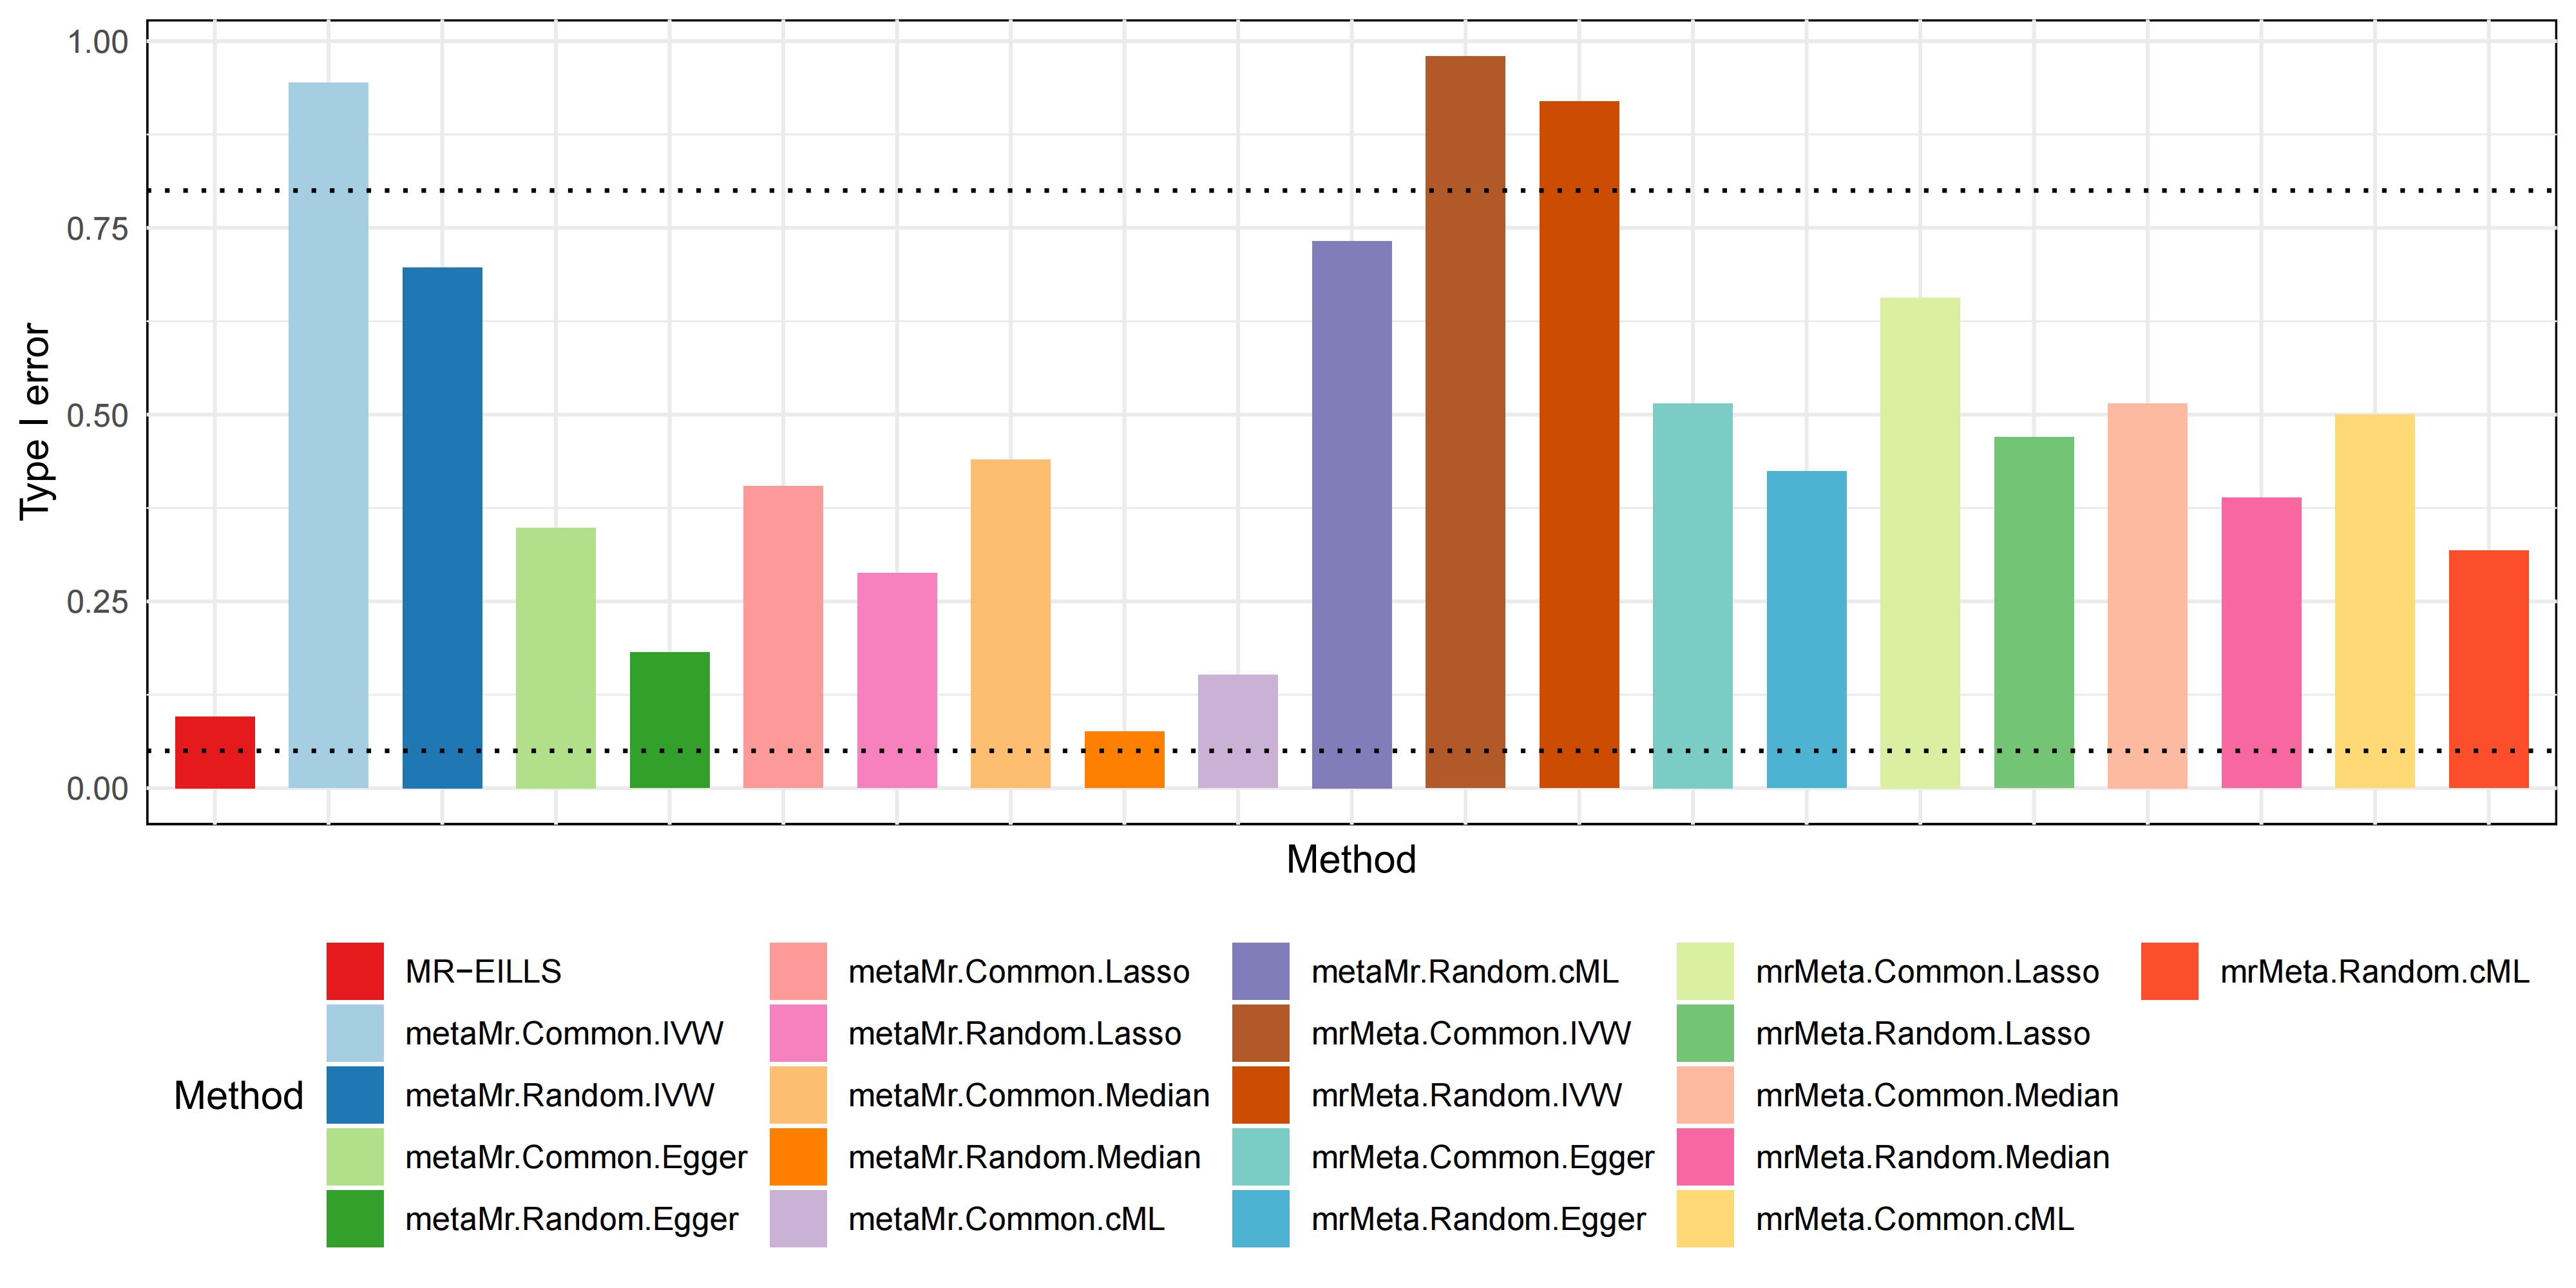


### Figure S15. Type I error of causal effects’ estimation when g=100, E=3, P=1, proportion of invalid IVs is 30%

## 3.2 Causal effect is 0.1


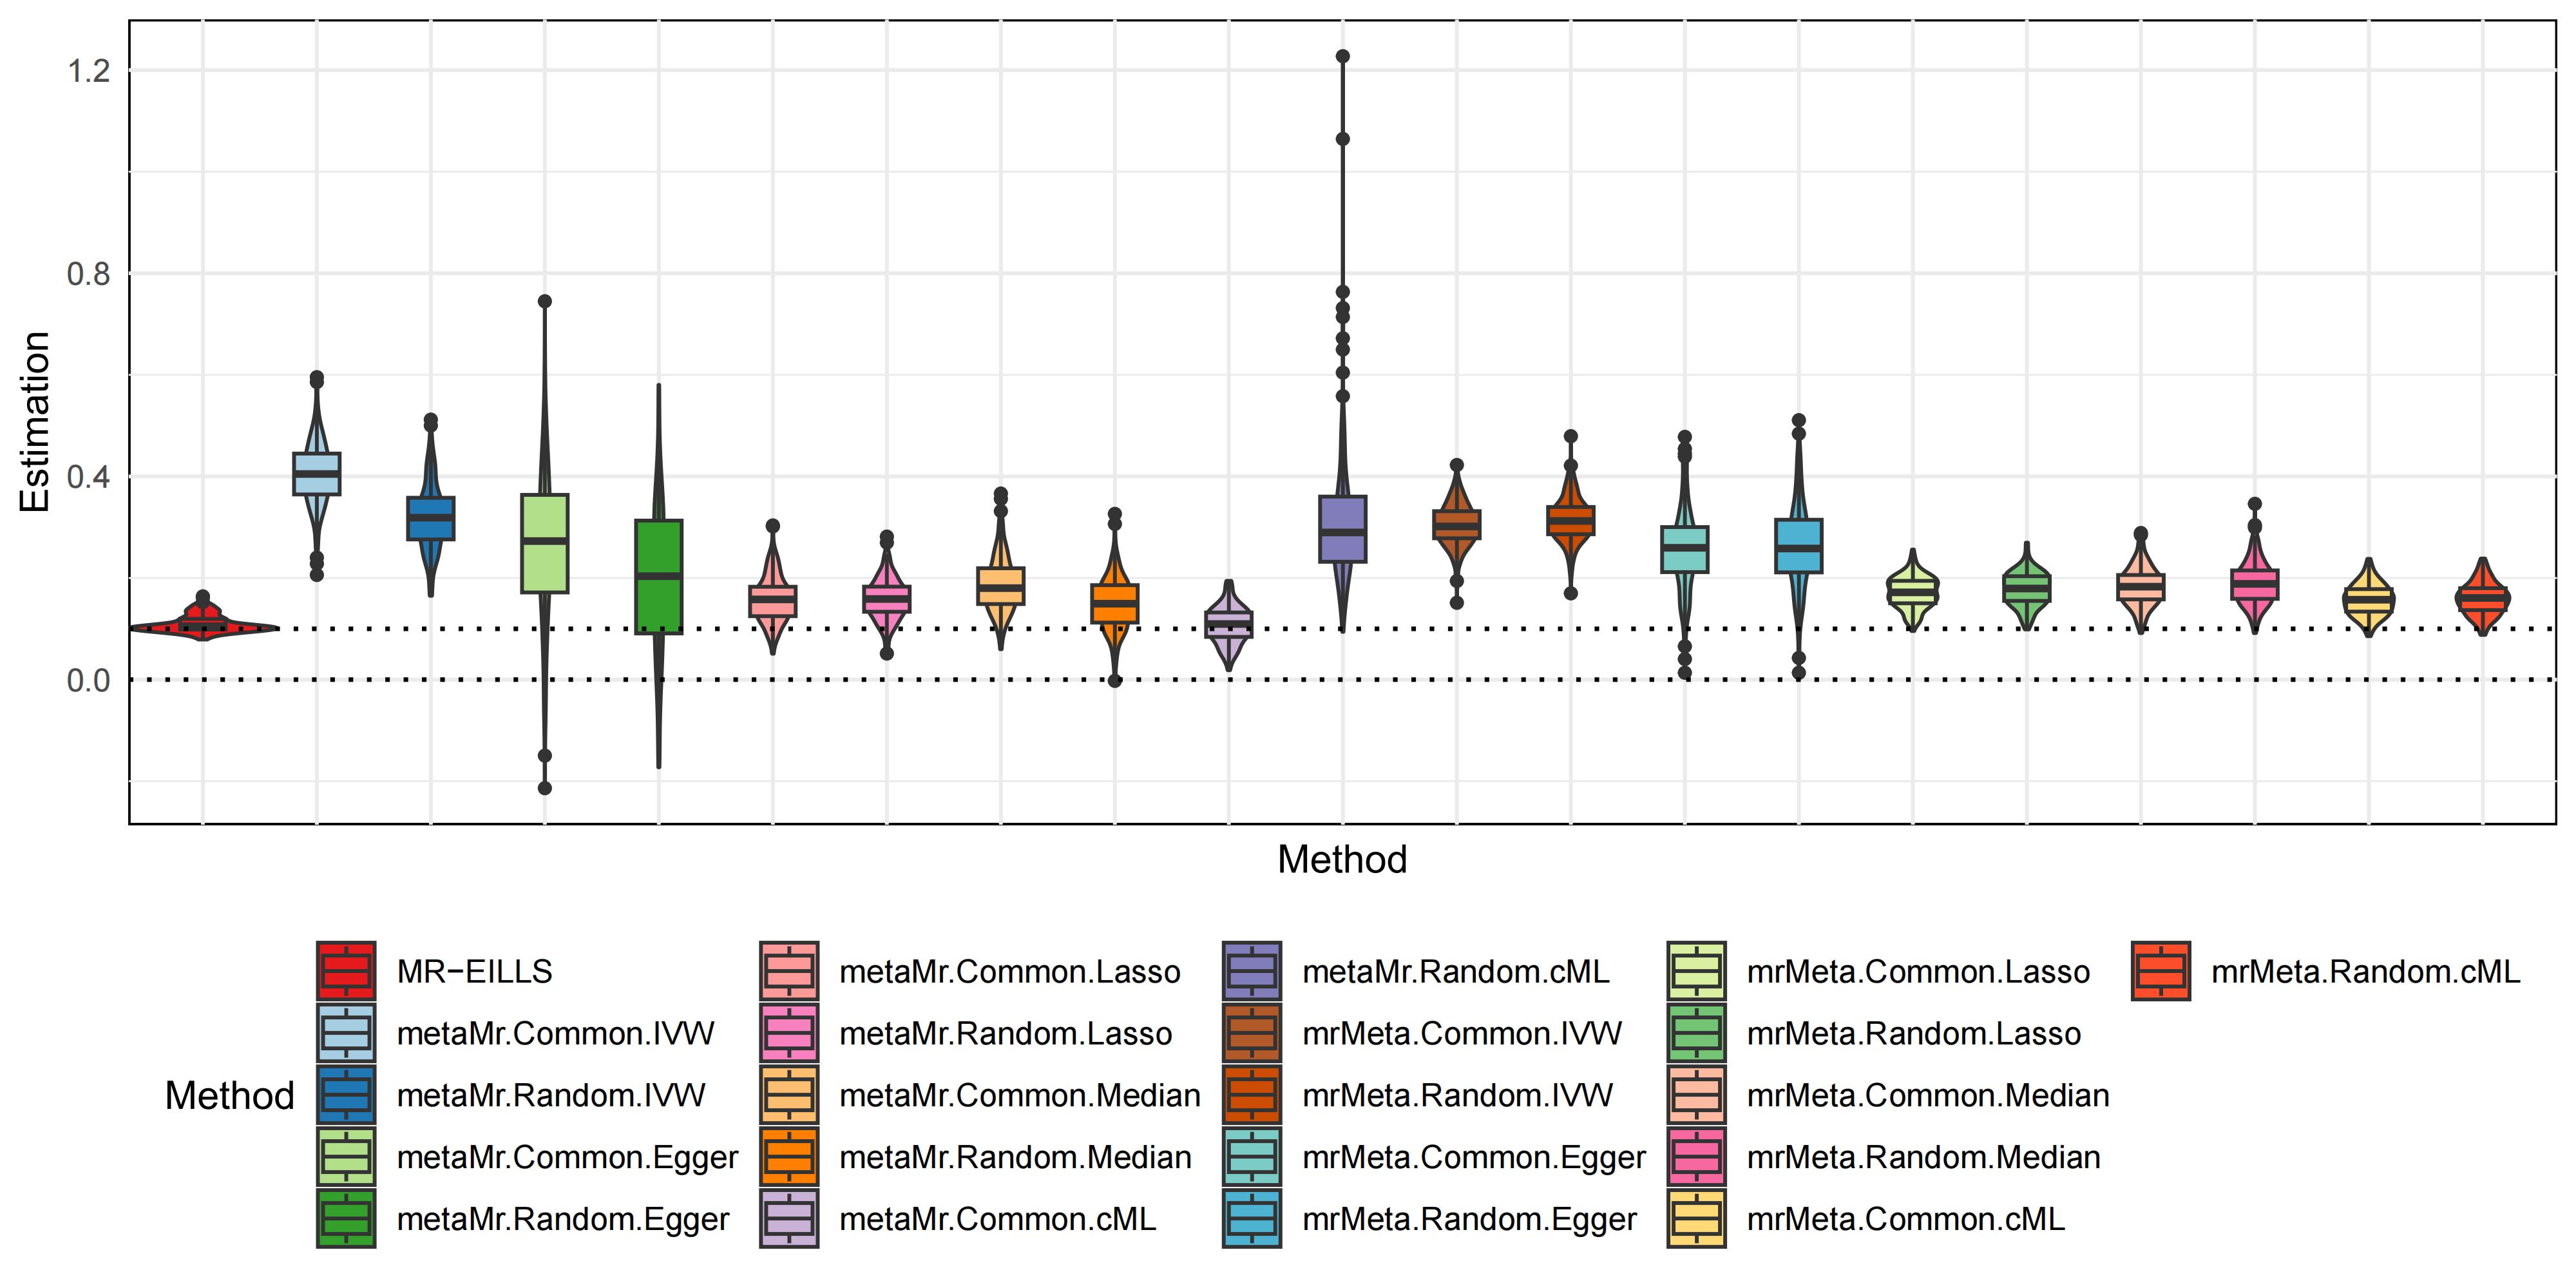


### Figure S16. Causal effects’ estimation when g=100, E=3, P=1, proportion of invalid IVs is 30%


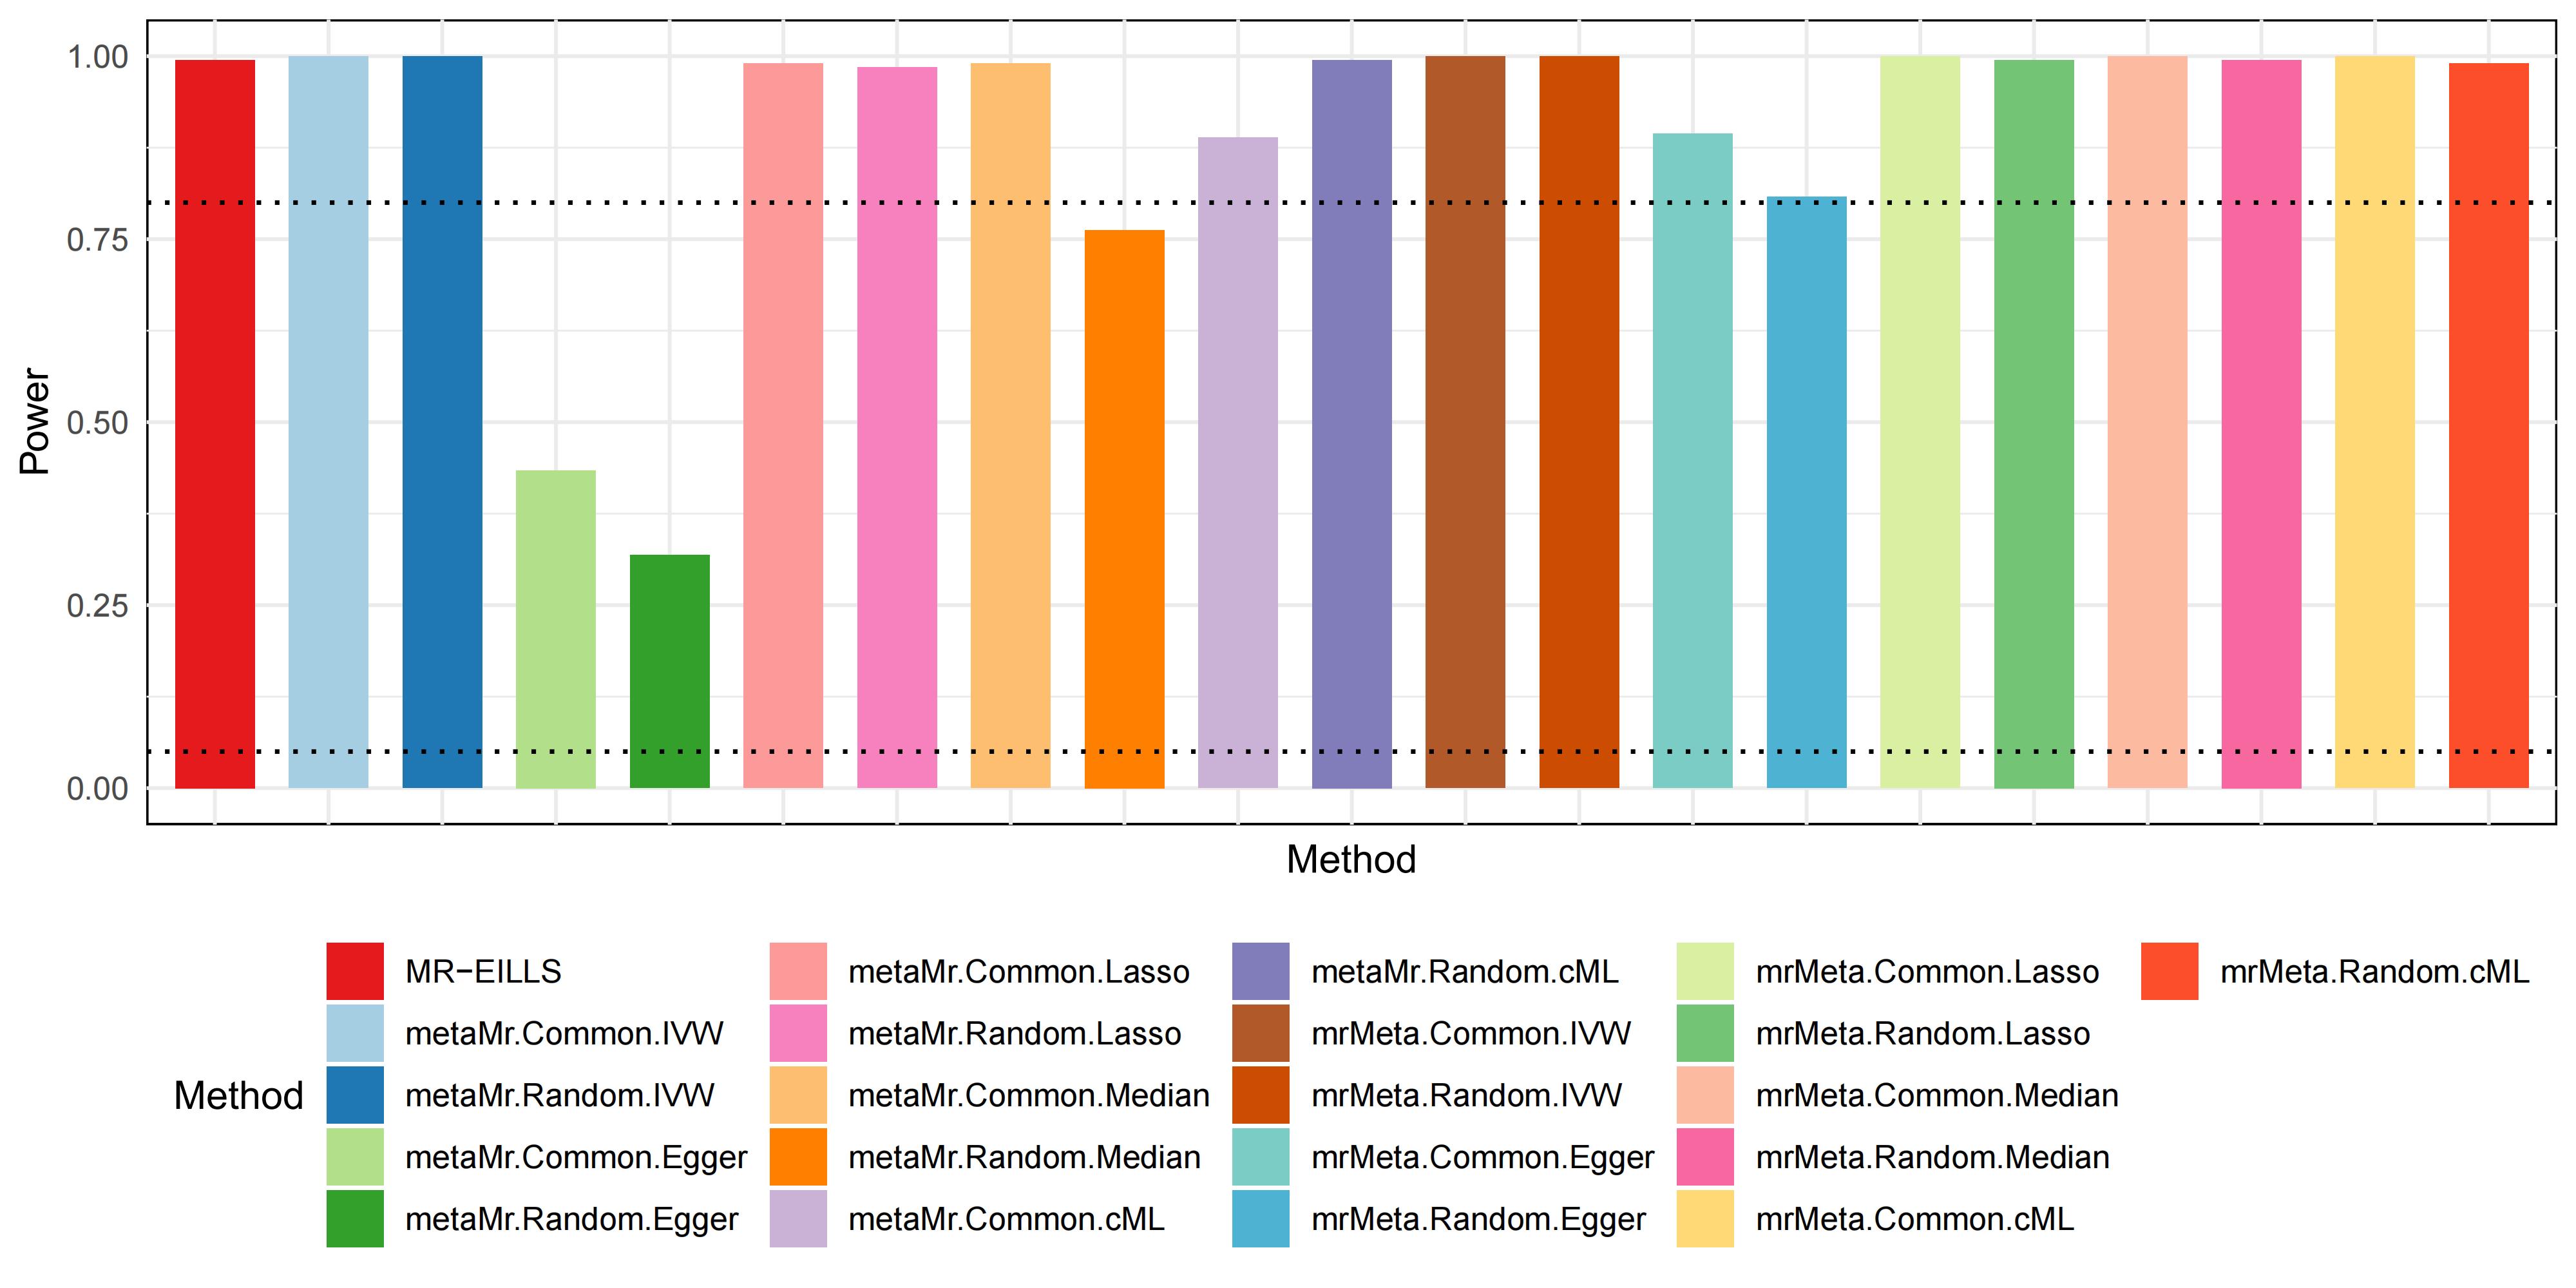


### Figure S17. Statistical Power of causal effects’ estimation when g=100, E=3, P=1, proportion of invalid IVs is 30%

# 4 UVMR Scenario (c): No pleiotropy

## 4.1 Causal effect is 0


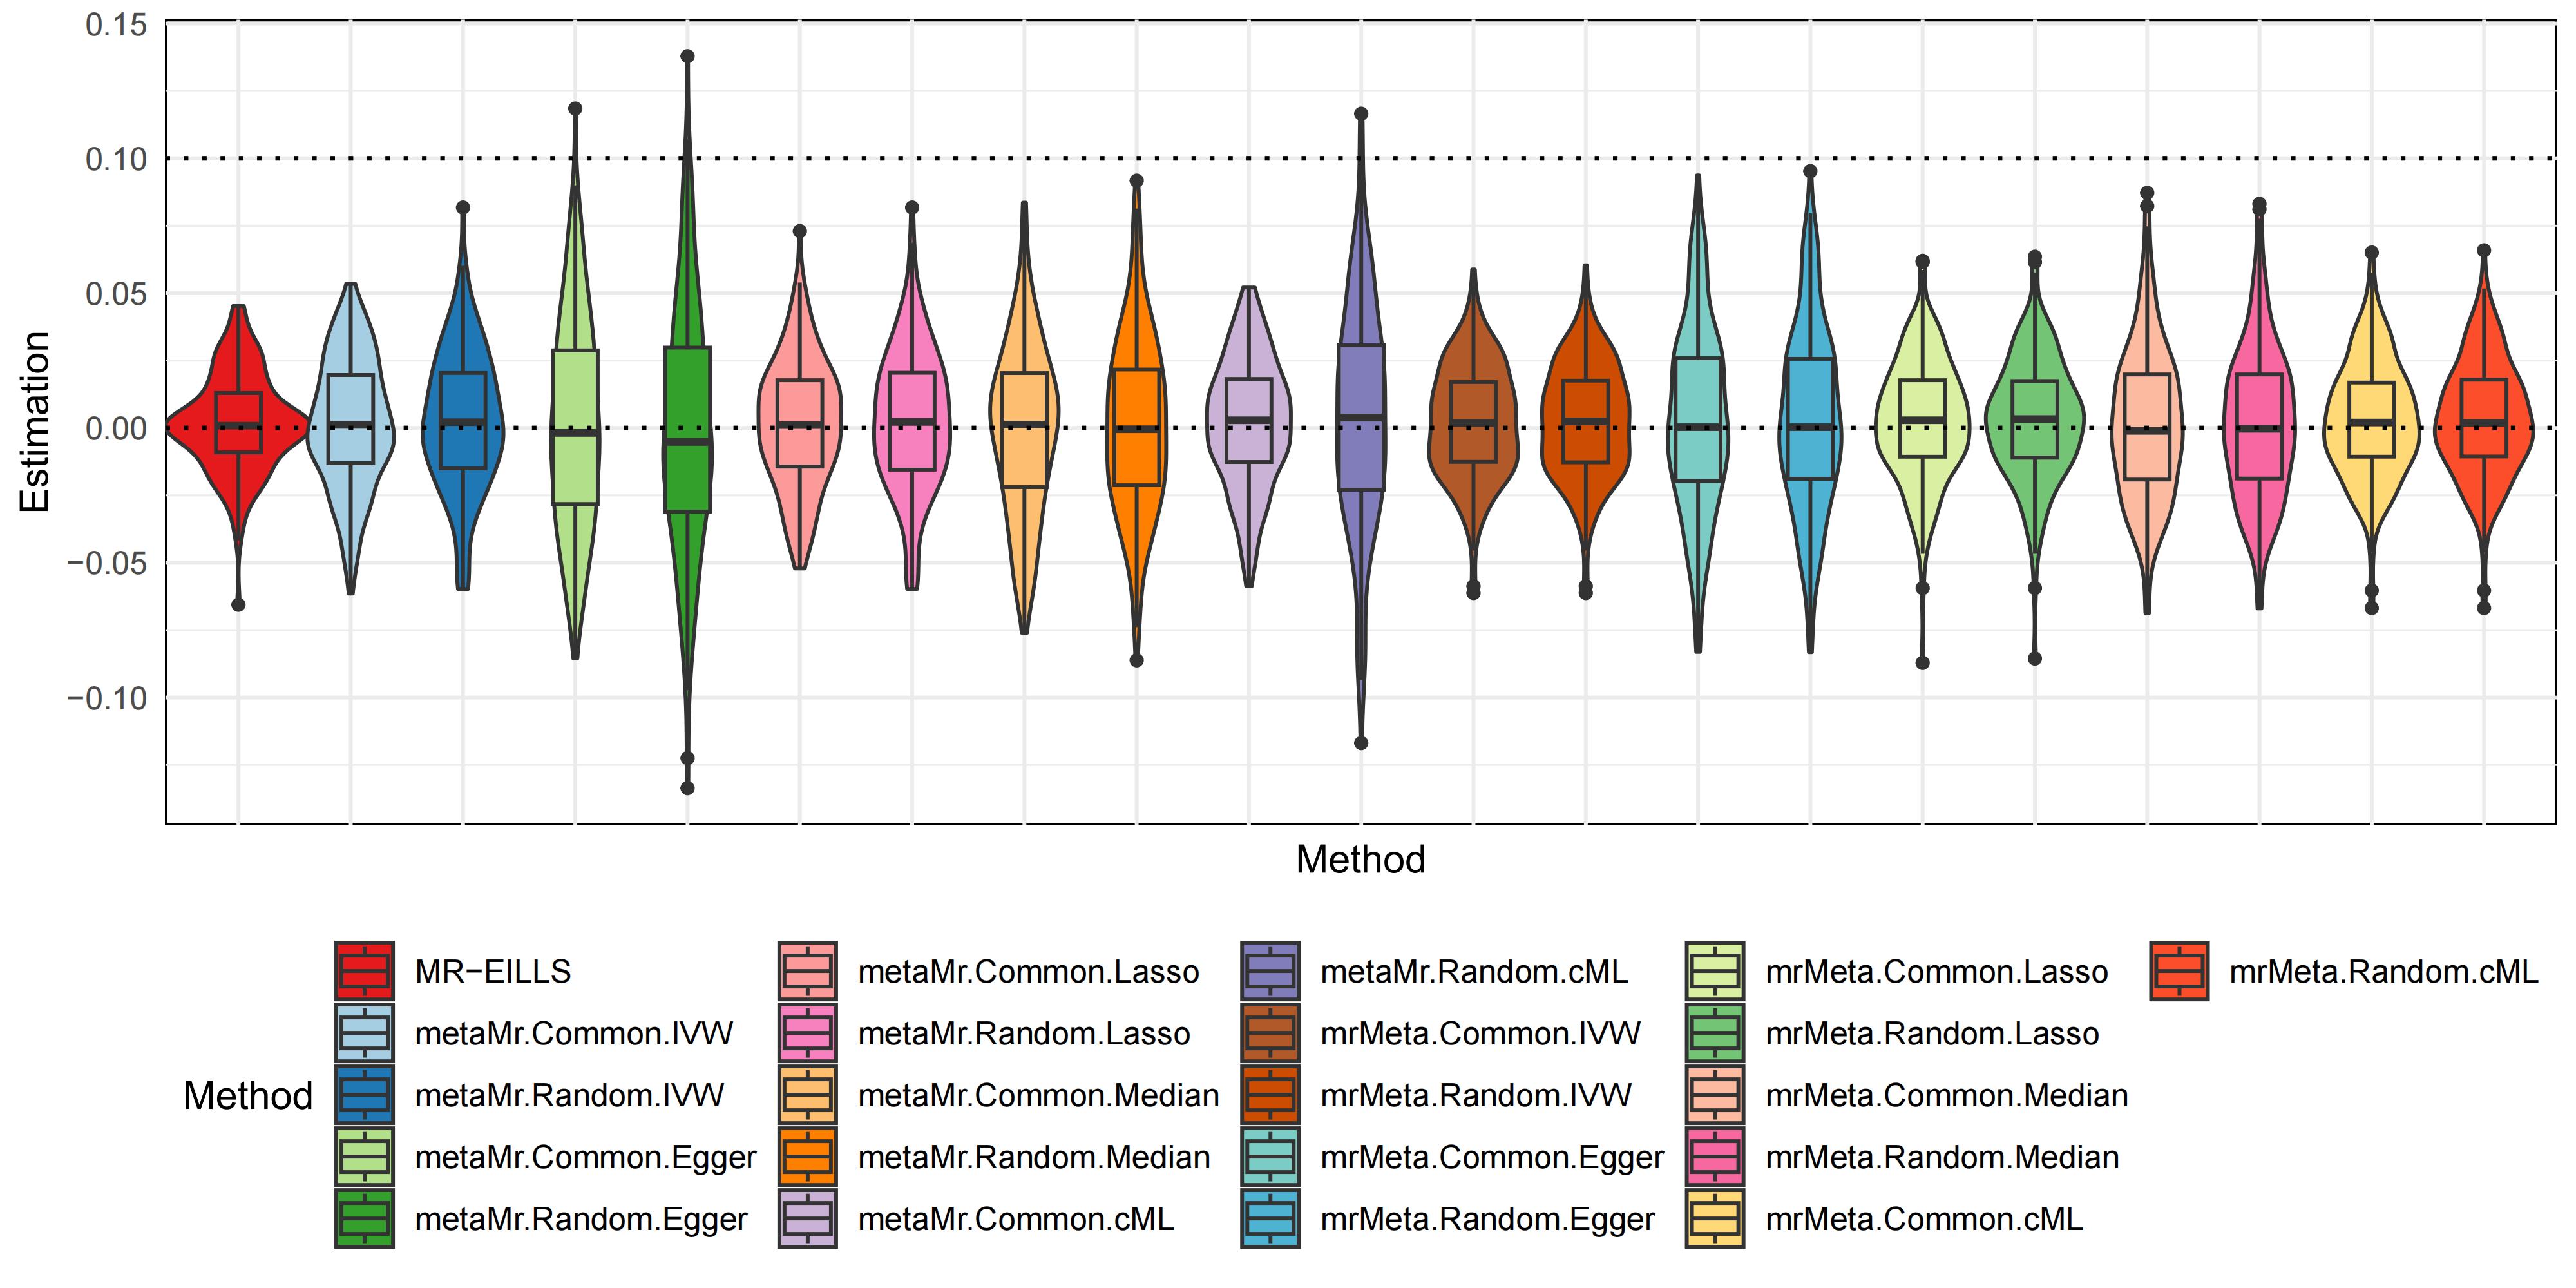


### Figure S18. Causal effects’ estimation when g=100, E=3, P=1


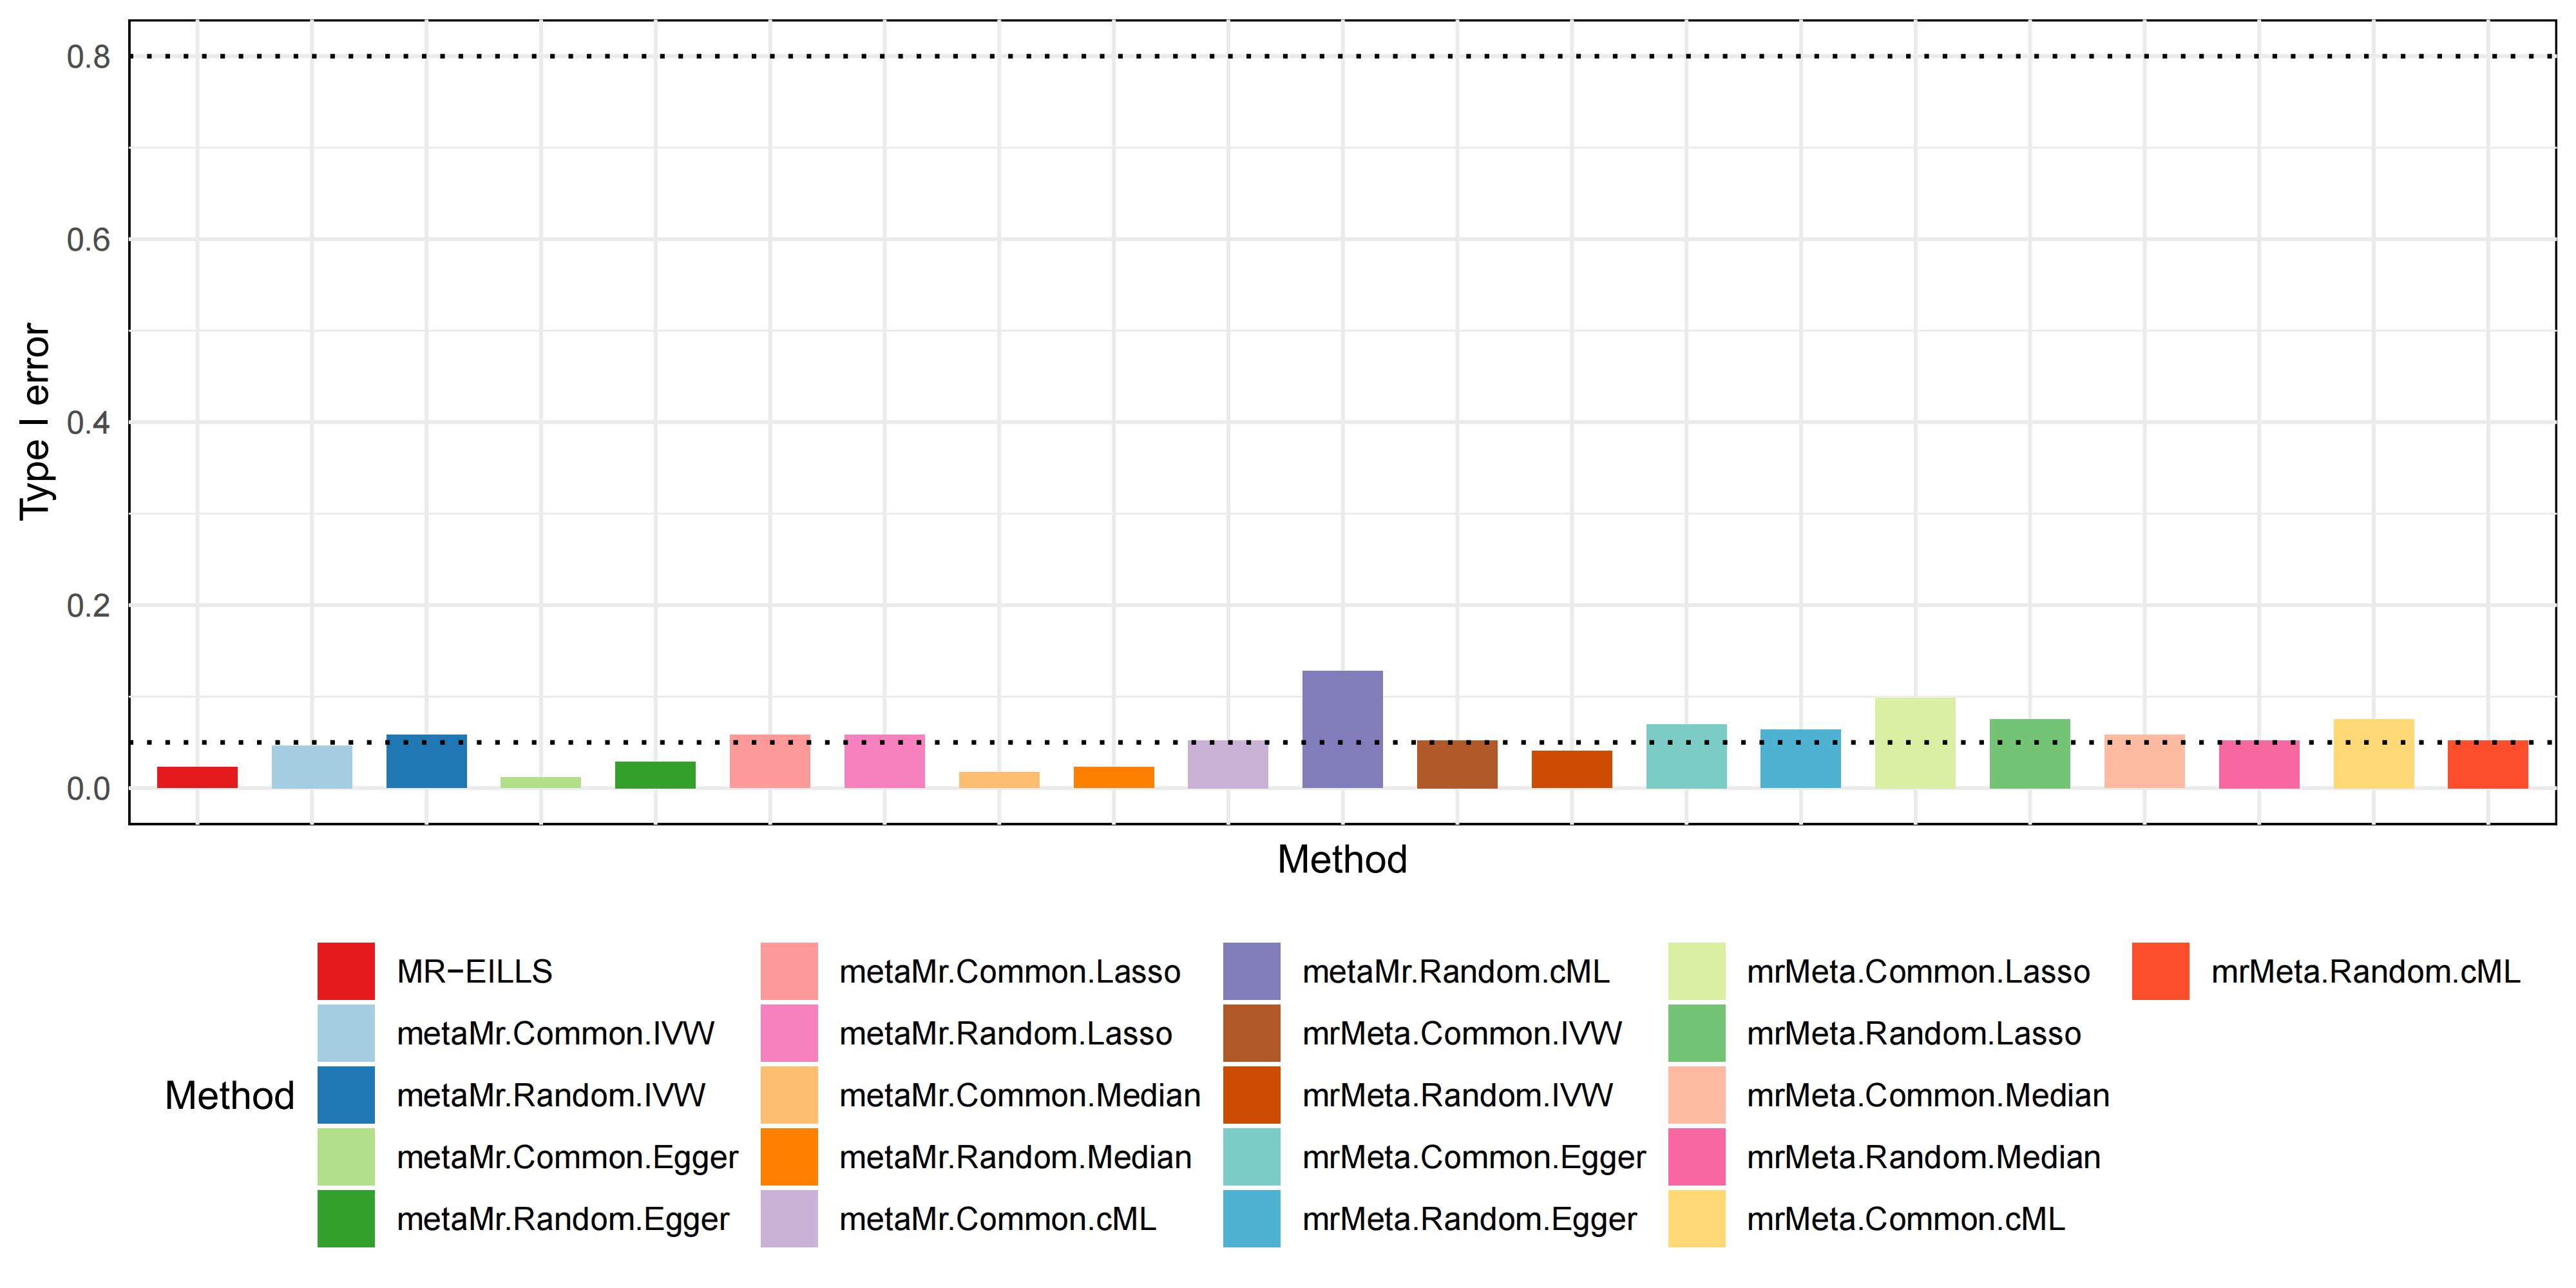


### Figure S19. Type I error of causal effects’ estimation when g=100, E=3, P=1

## 4.2 Causal effect is 0.1


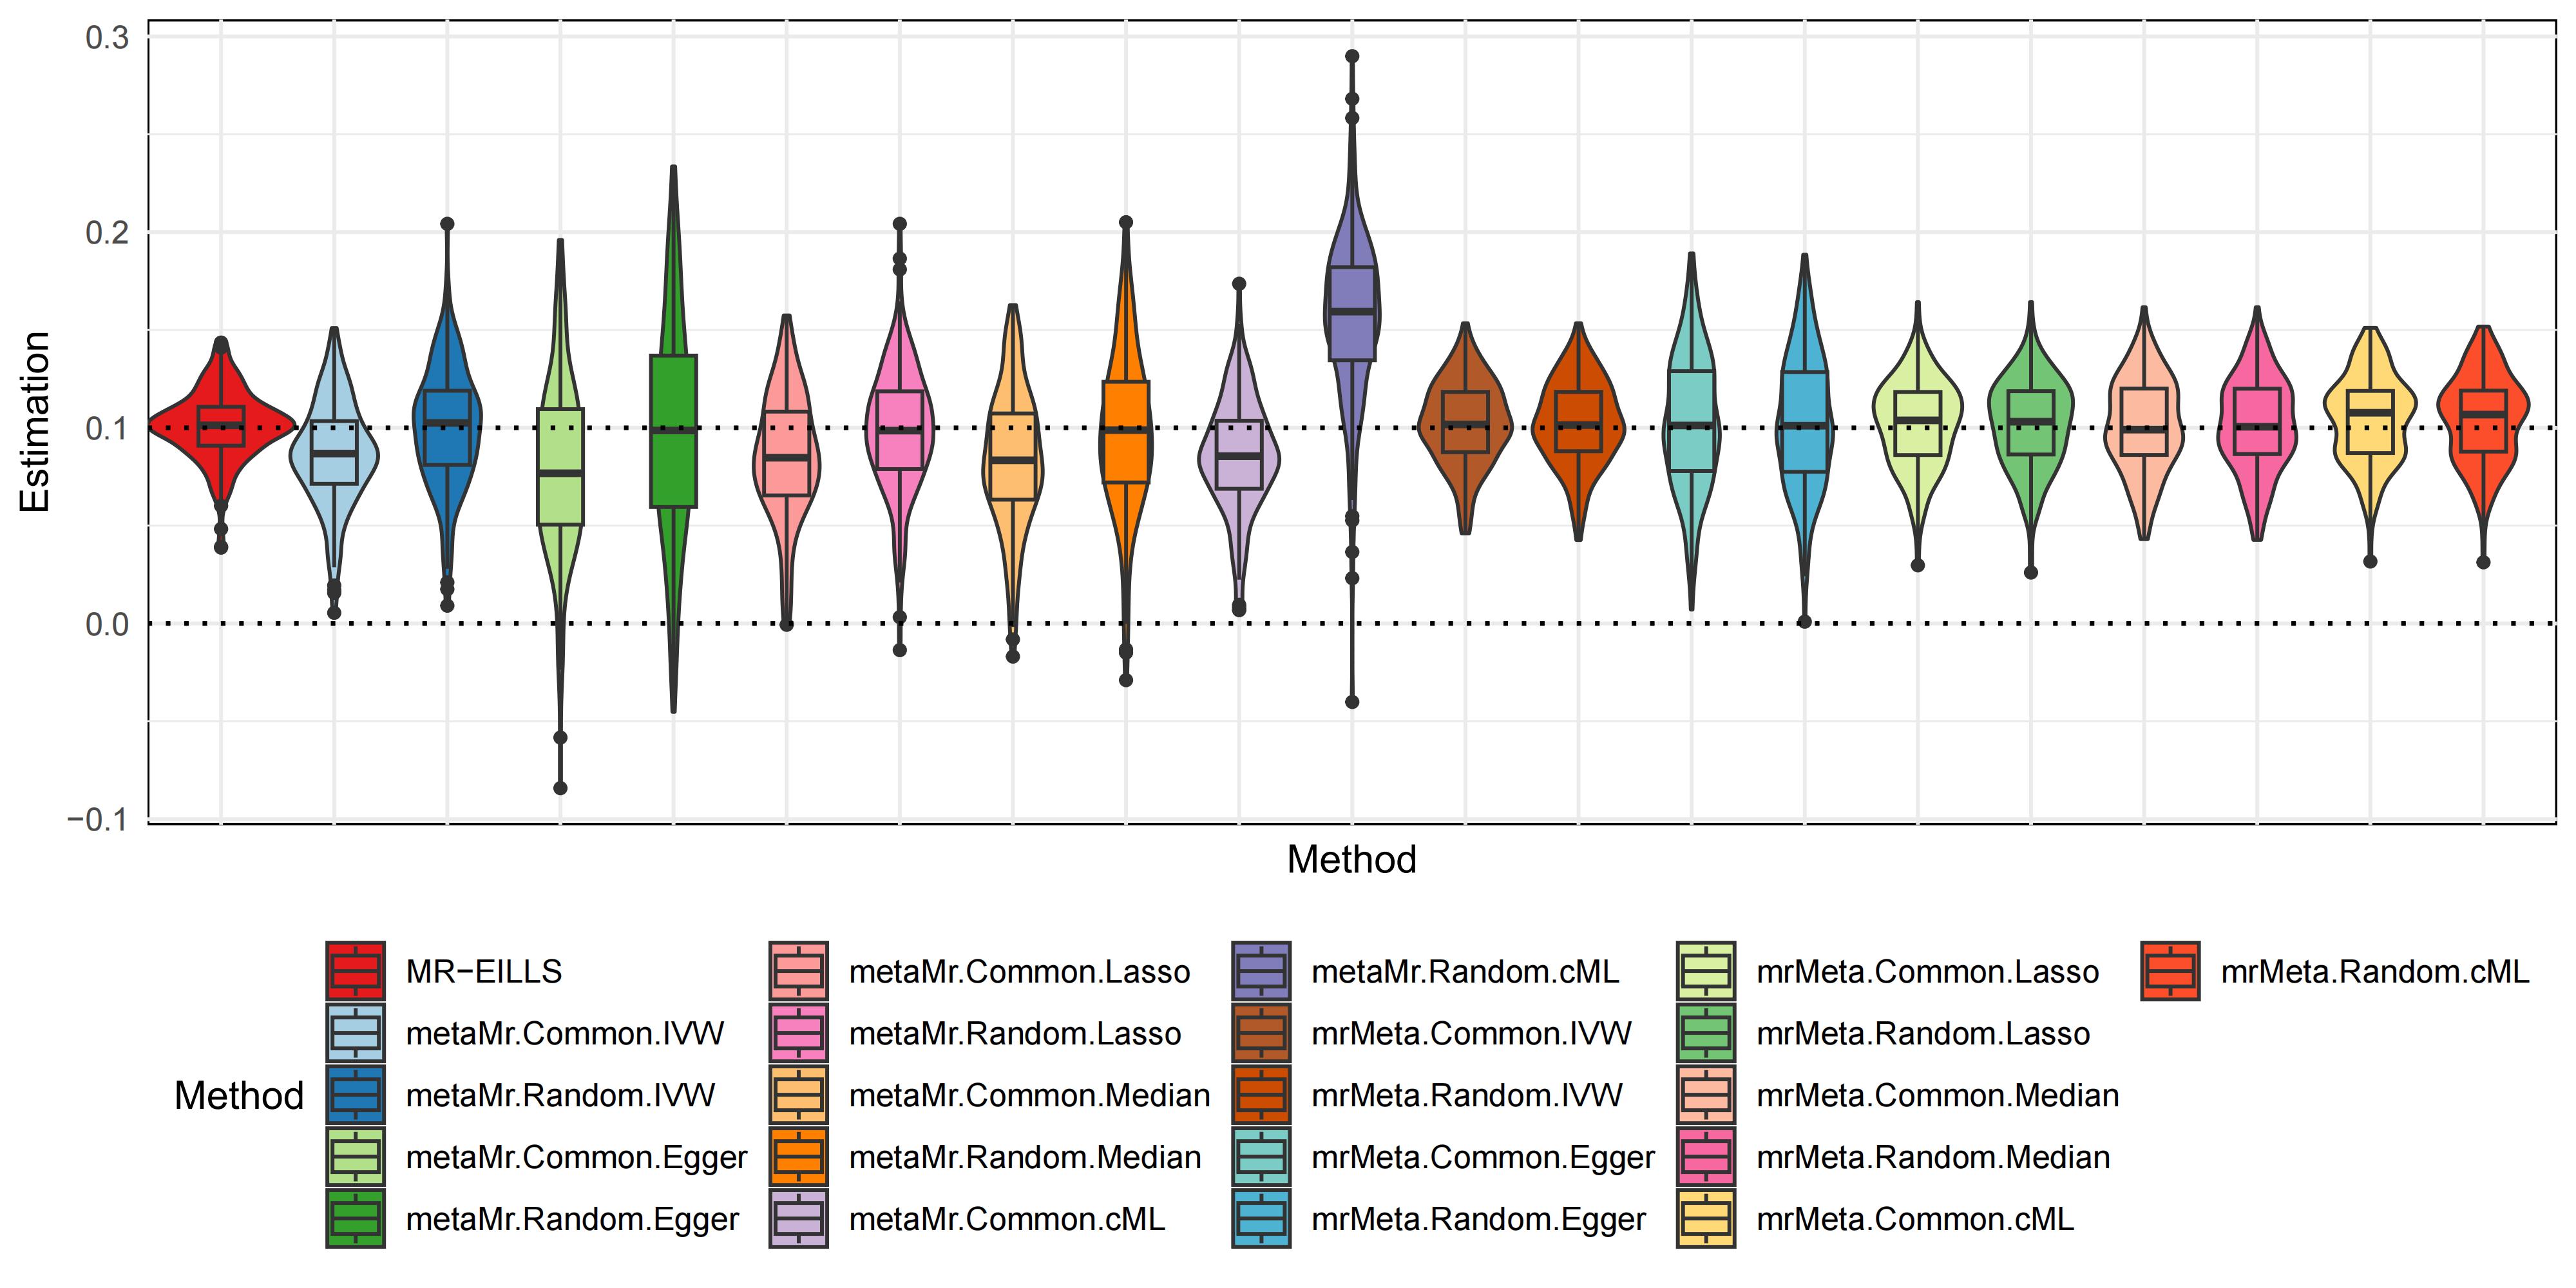


### Figure S20. Causal effects’ estimation when g=100, E=3, P=1


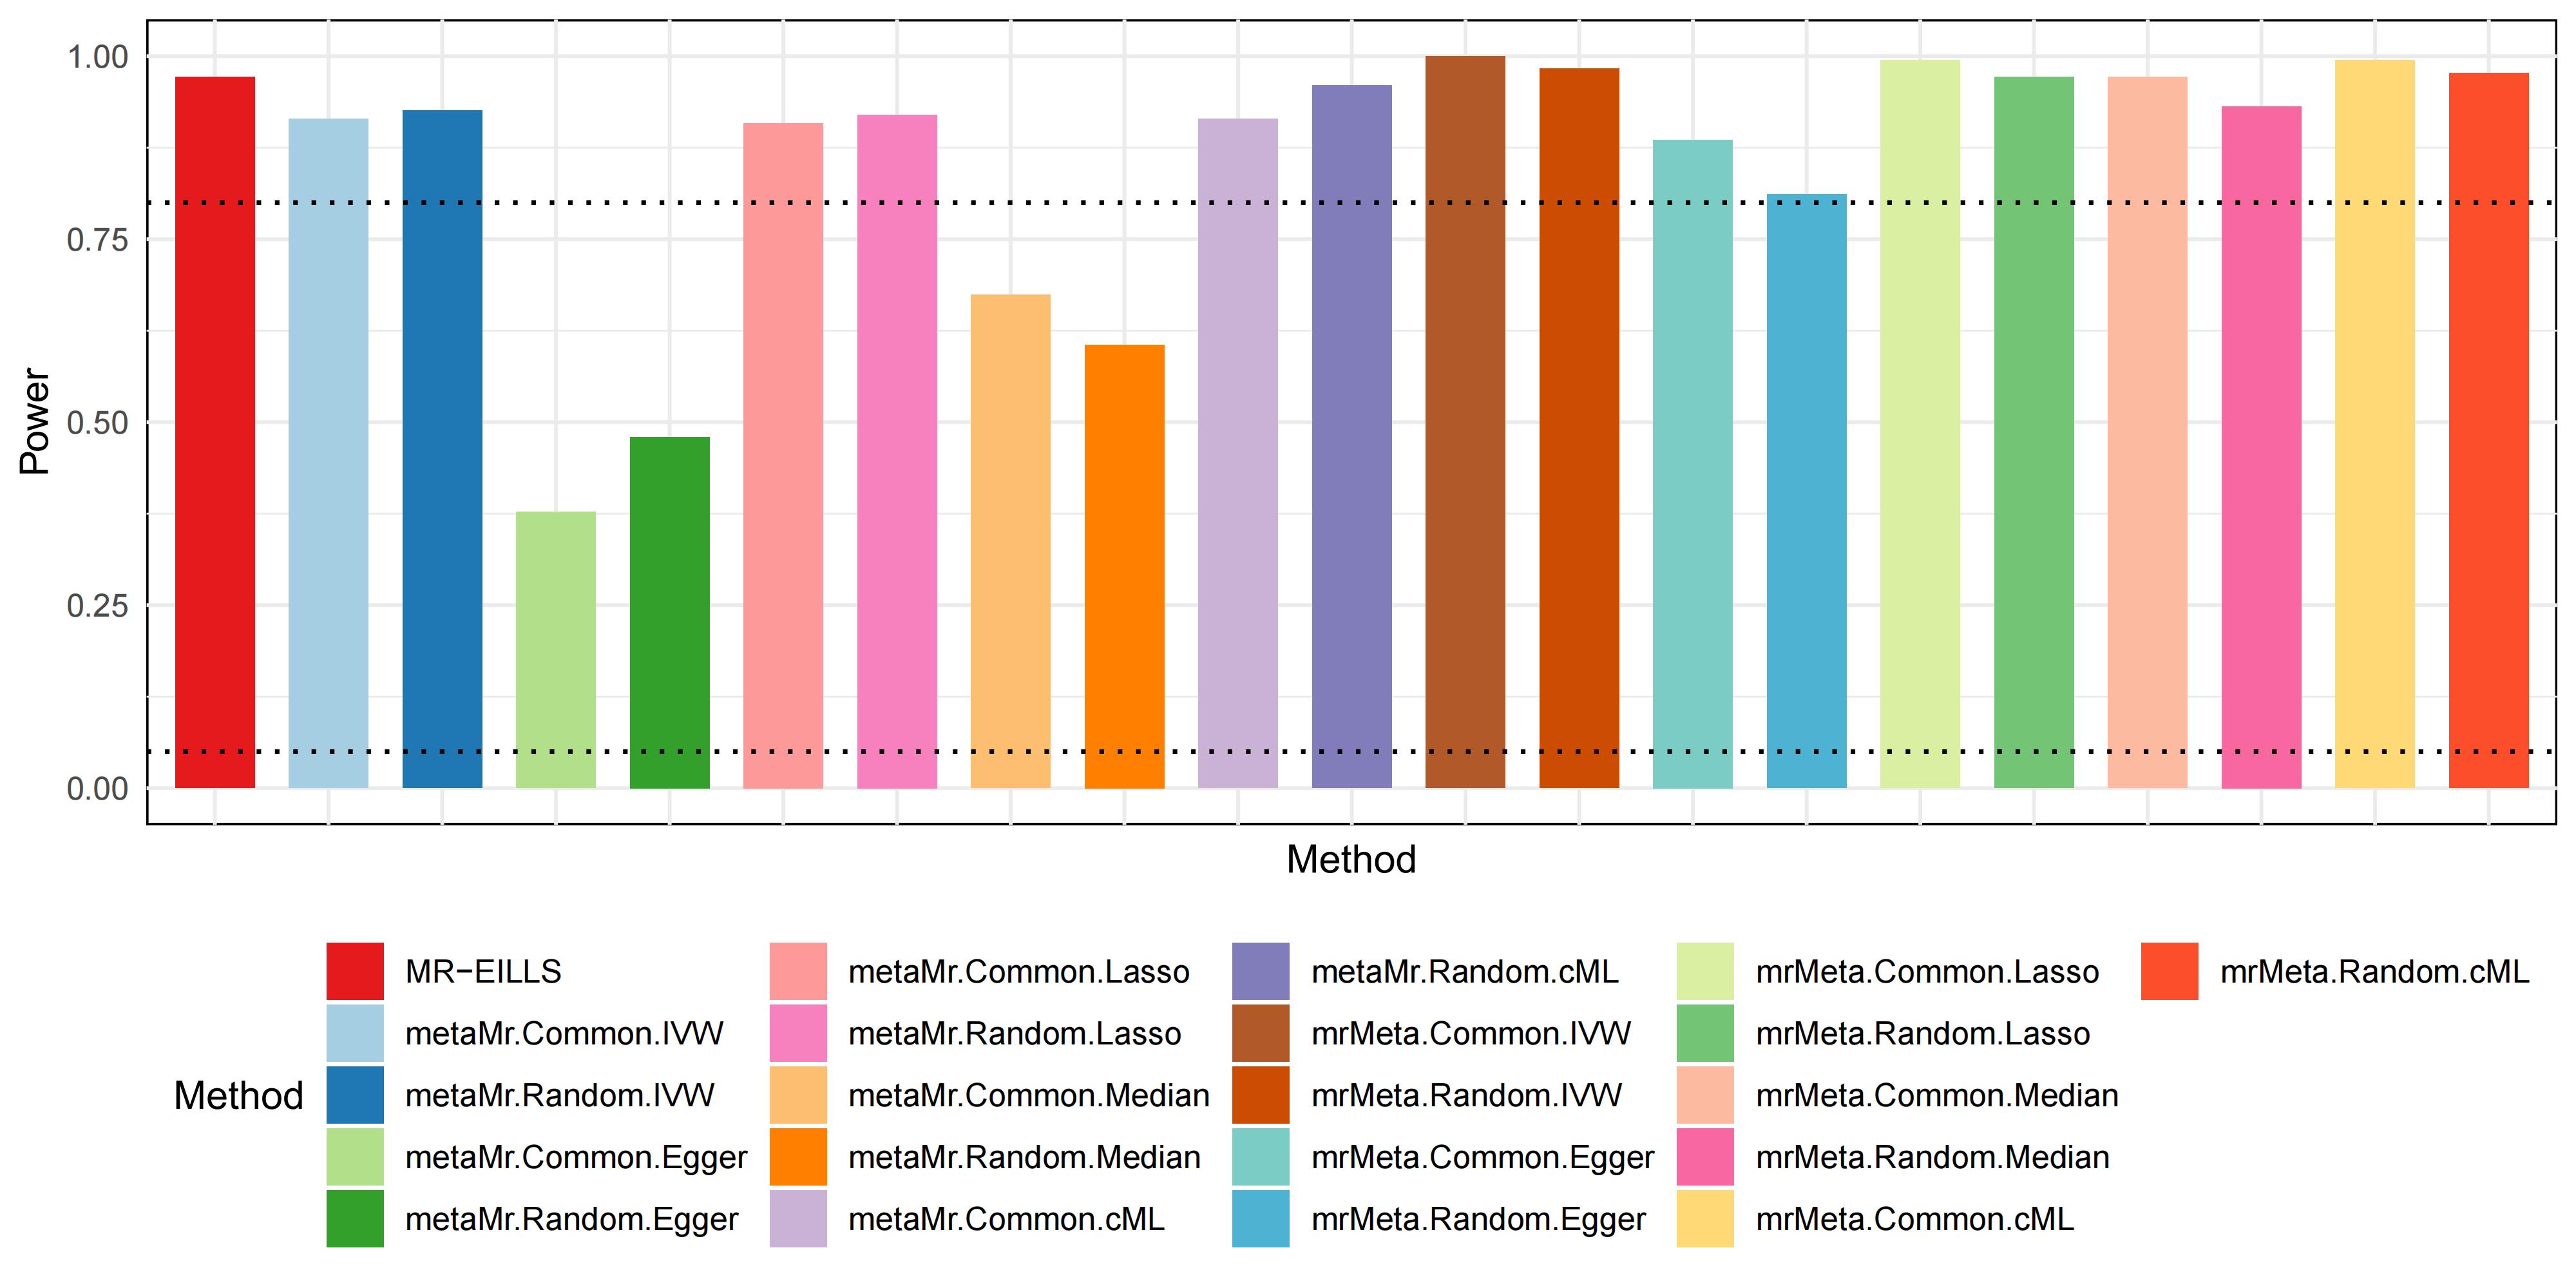


### Figure S21. Statistical Power of causal effects’ estimation when g=100, E=3, P=1

# 5 MVMR Scenario (a): Correlated and uncorrelated pleiotropy

## 5.1 Performance of causal effect estimation


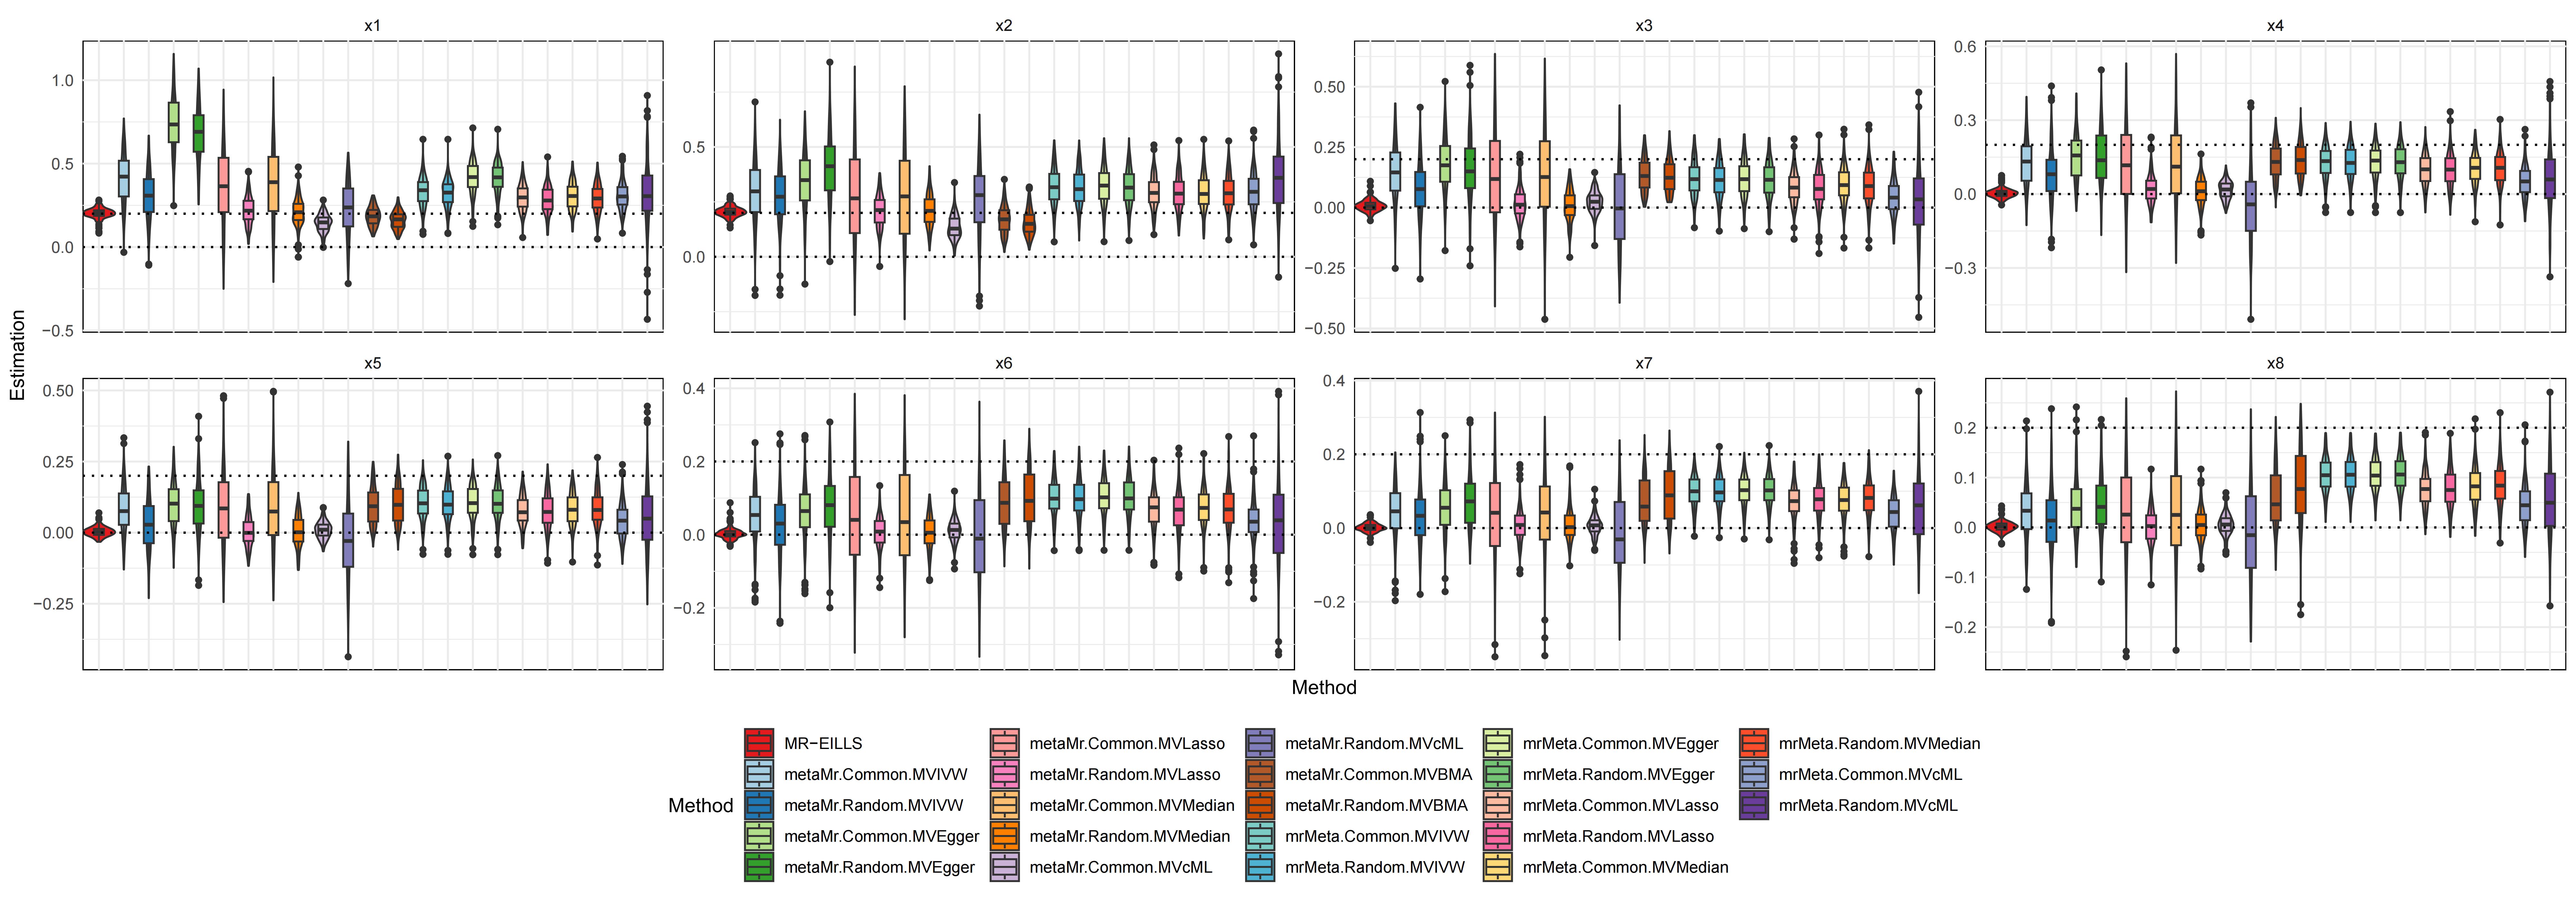


### Figure S22. Causal effects’ estimation when proportion of invalid IVs is 30%, g=100, E=8, P=8


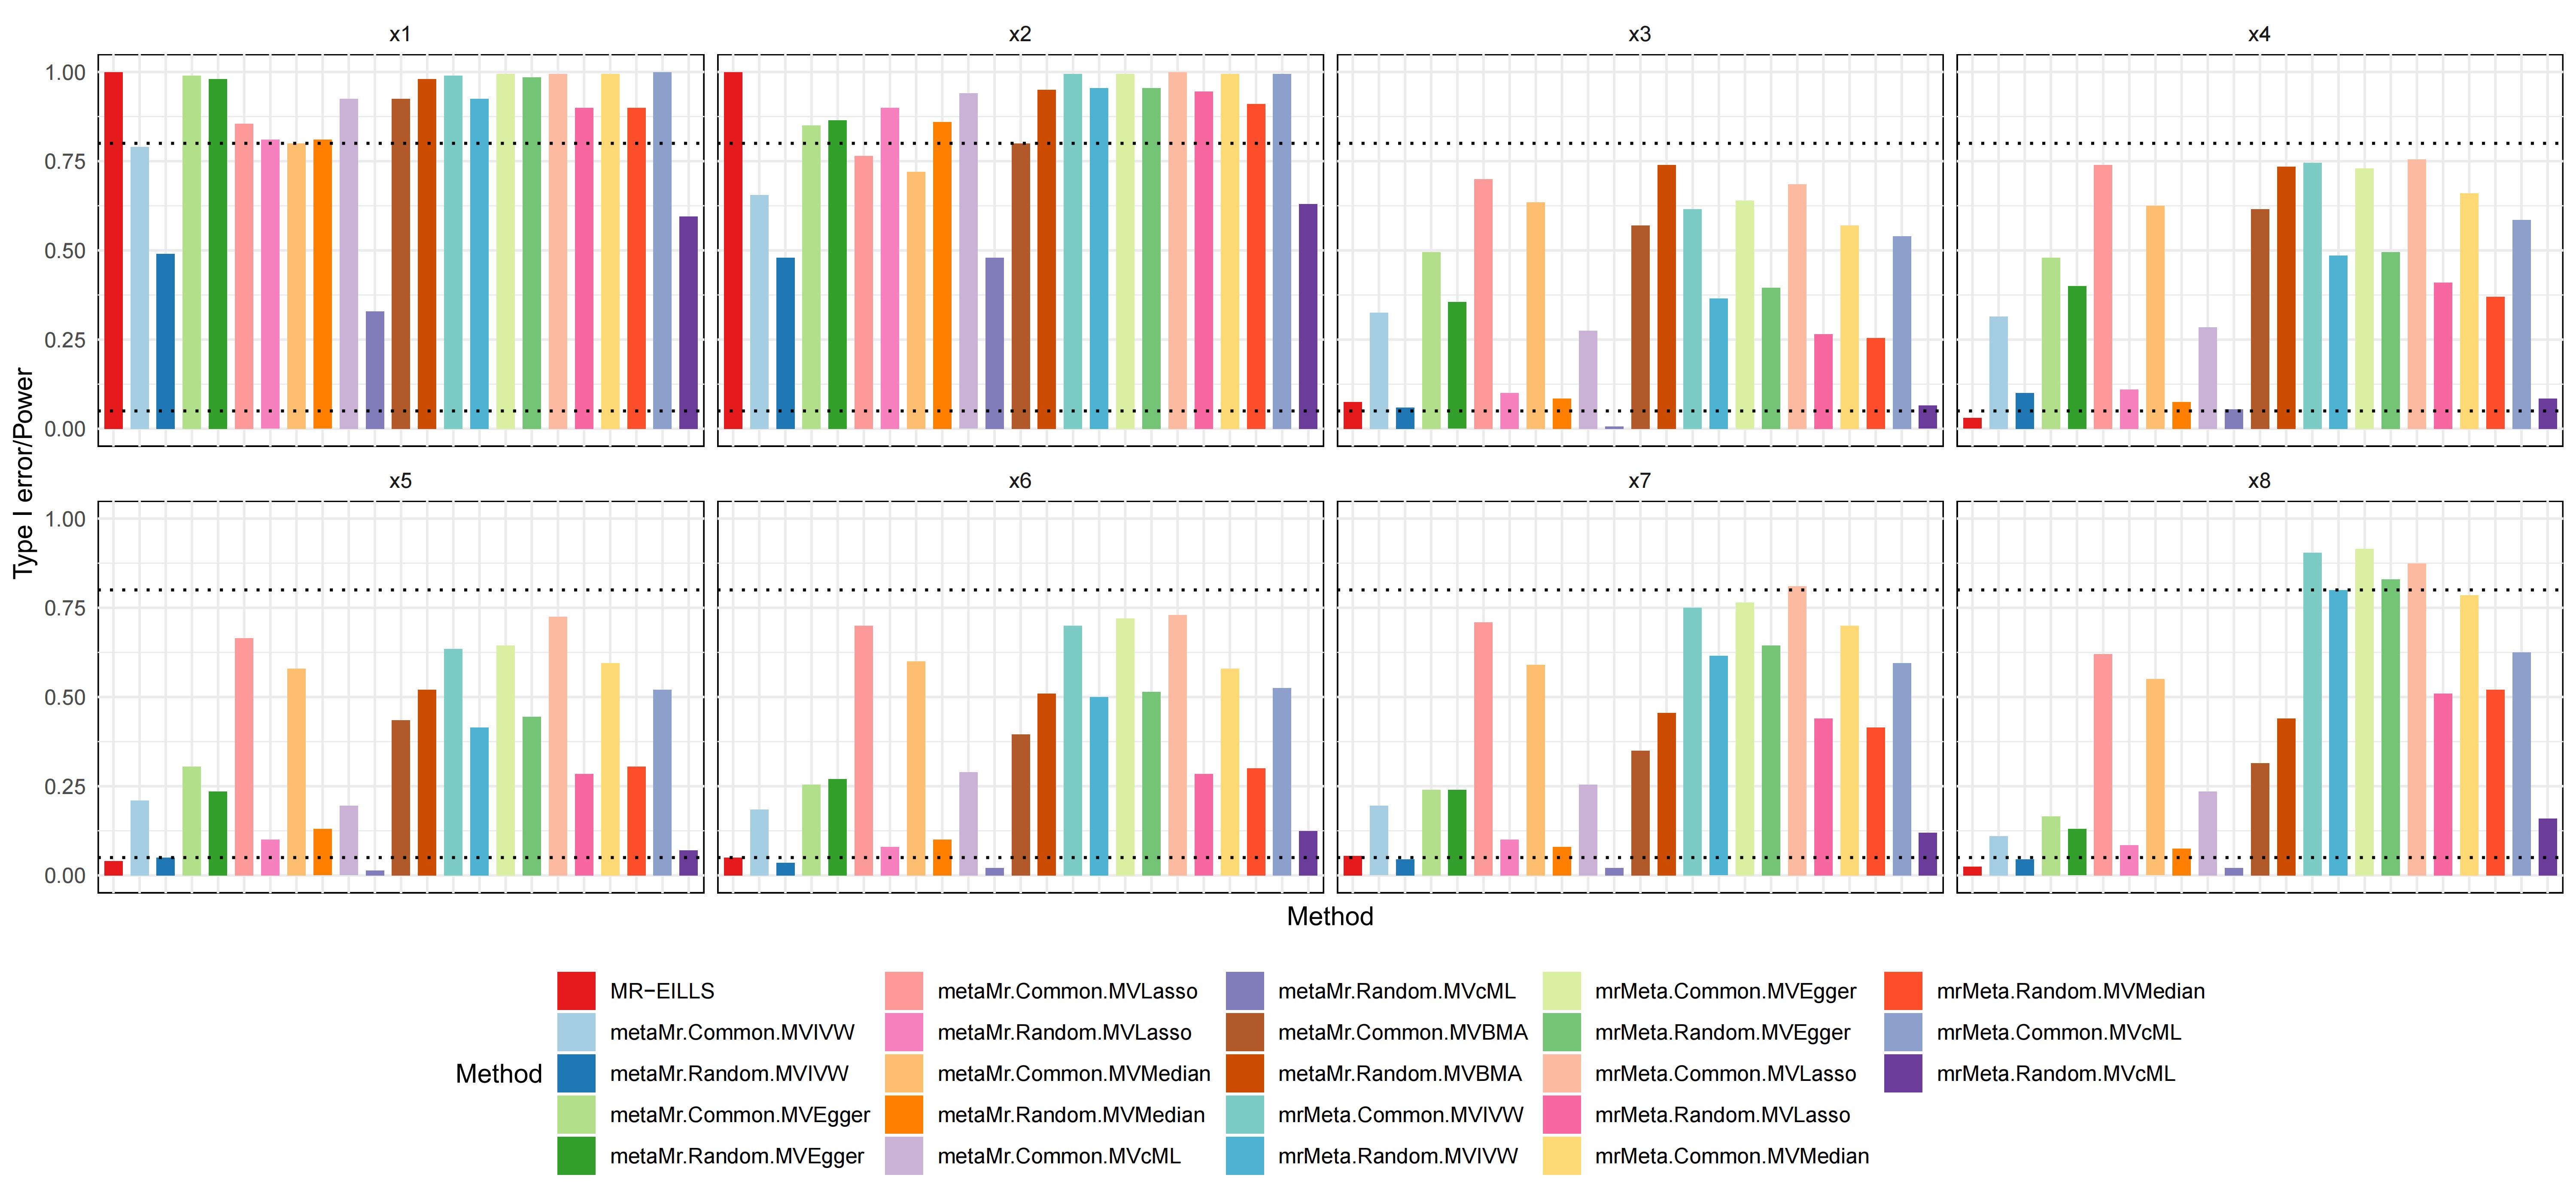


### Figure S23. Type I error/Power of causal effects’ estimation when proportion of invalid IVs is 30%, g=100, E=8, P=8


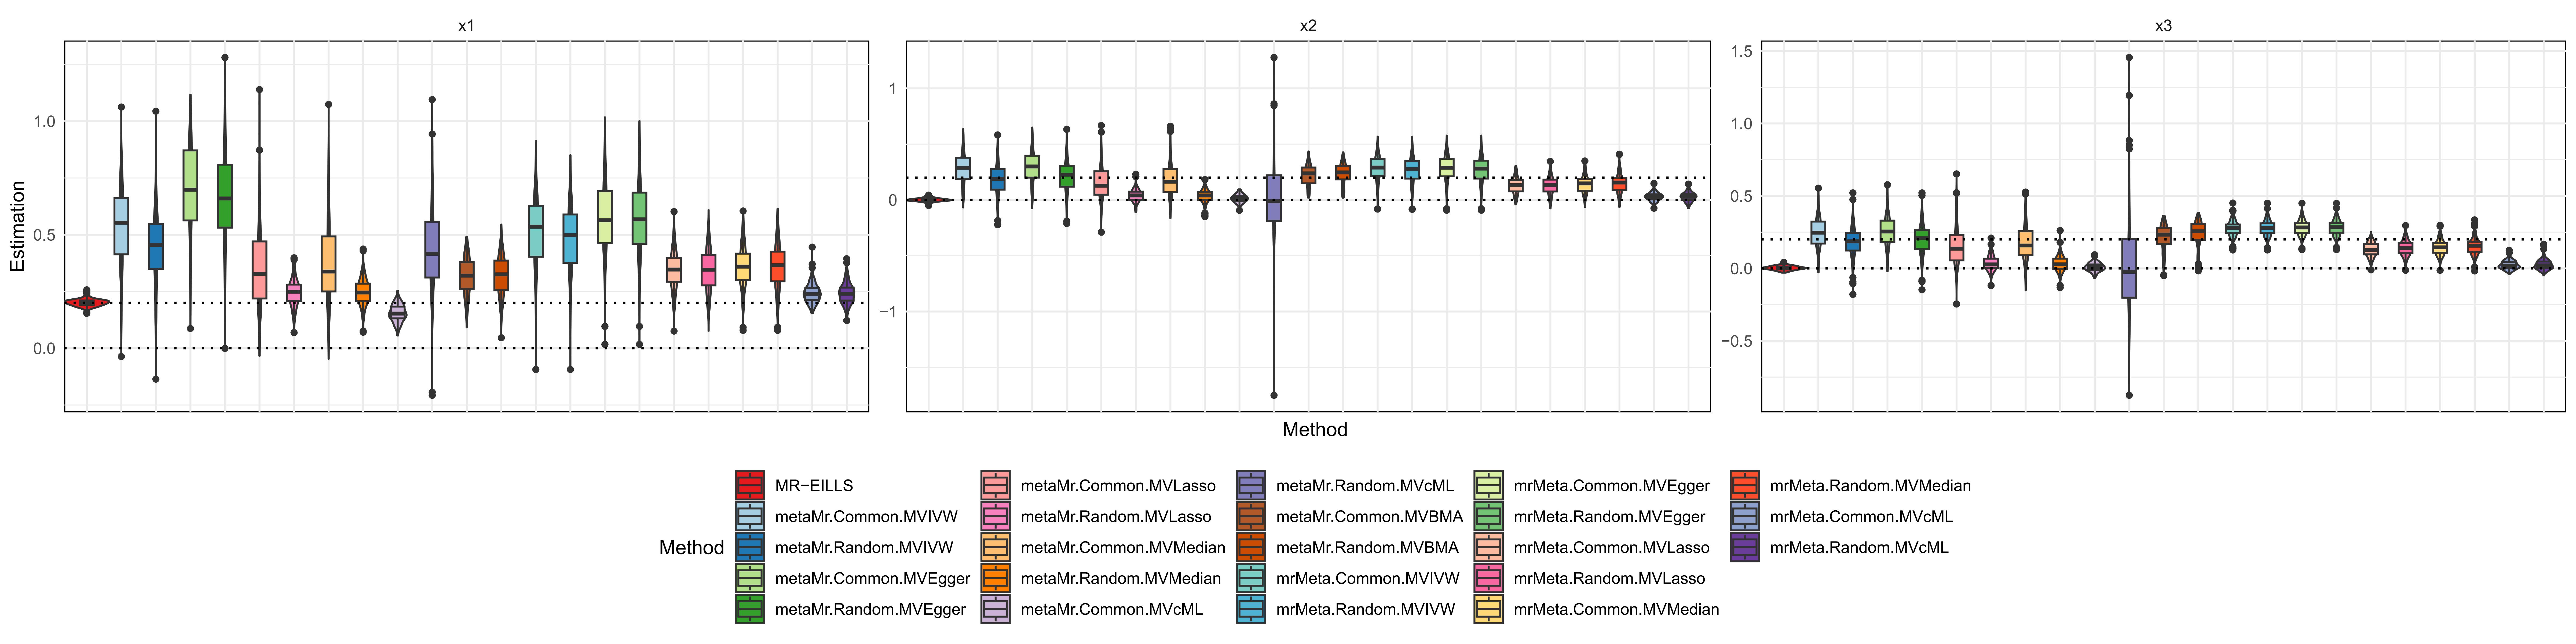


### Figure S24. Causal effects’ estimation when proportion of invalid IVs is 30%, g=100, E=3, P=3


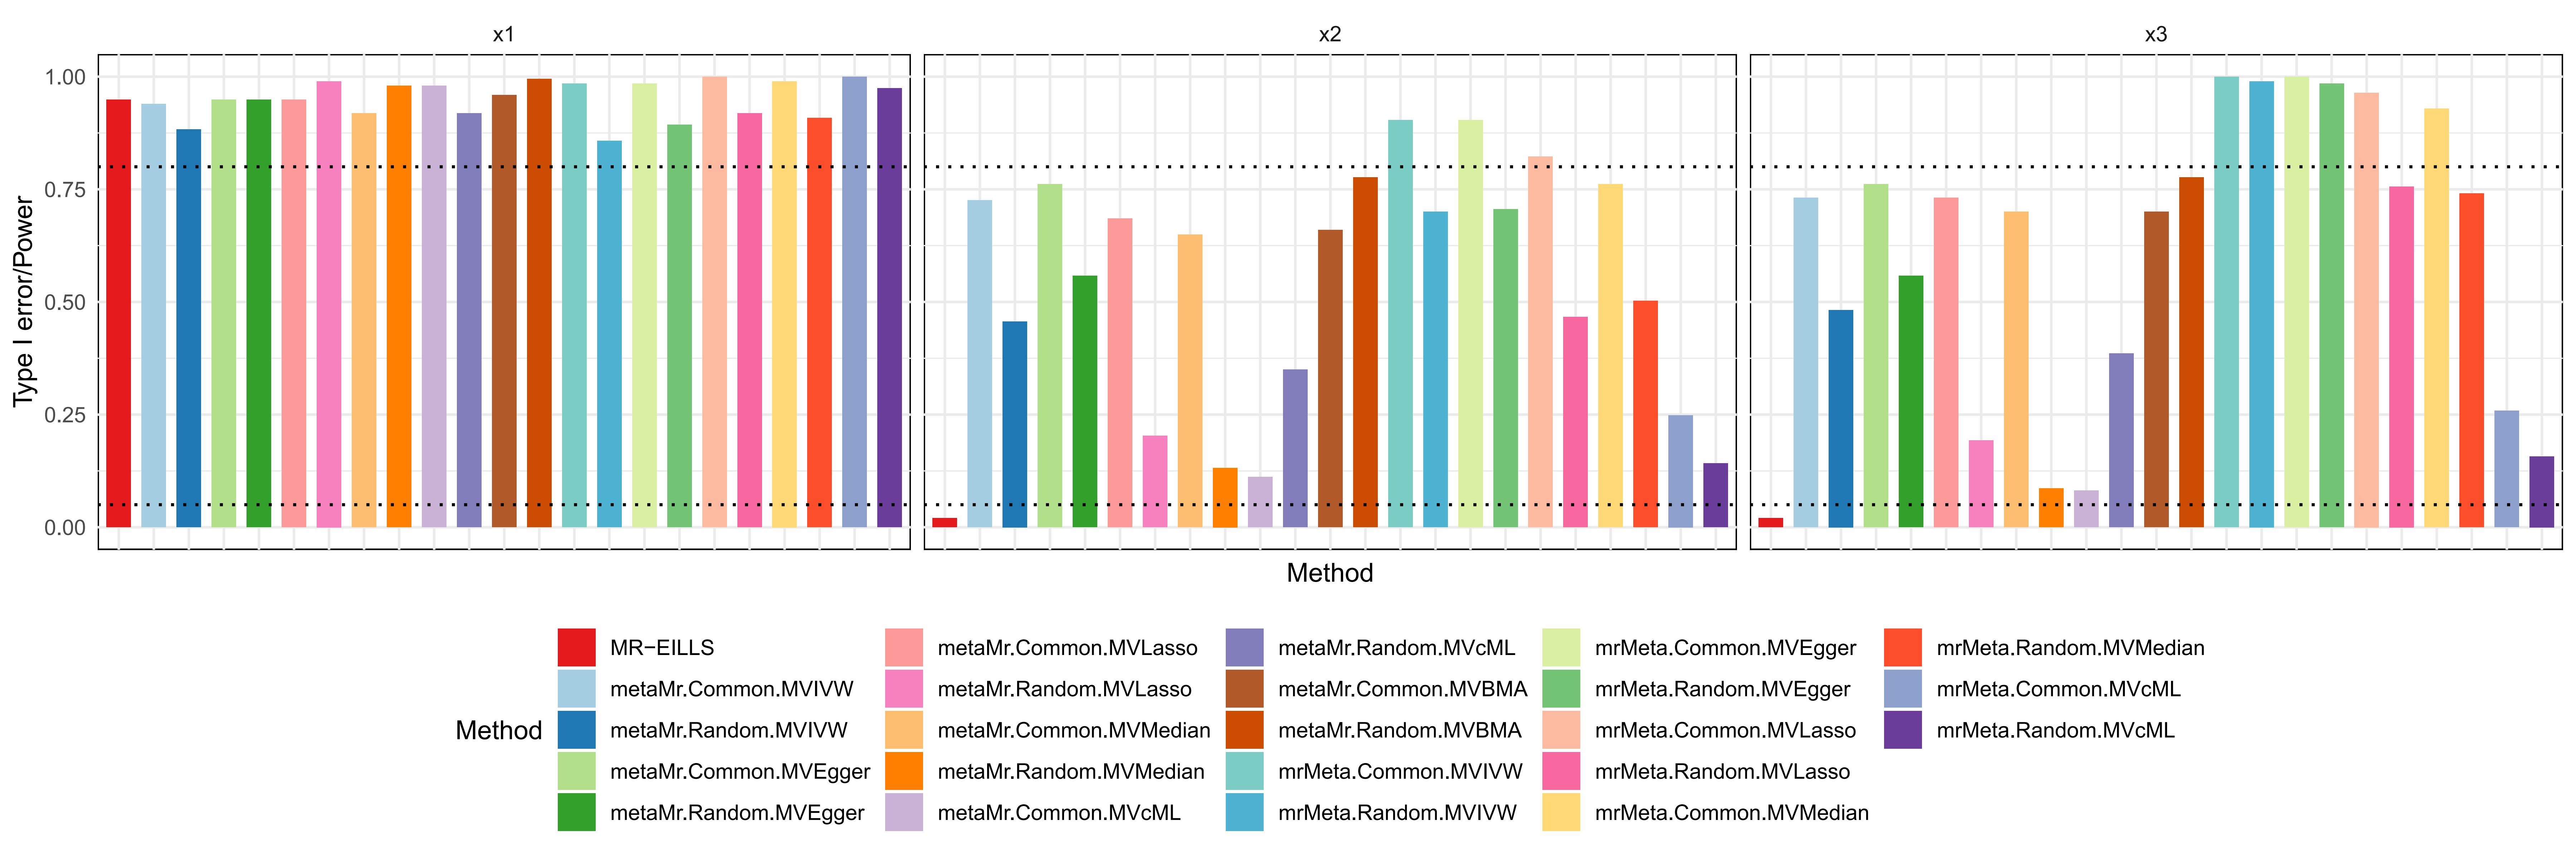


### Figure S25. Type I error/Power of causal effects’ estimation when proportion of invalid IVs is 30%, g=100, E=3, P=3


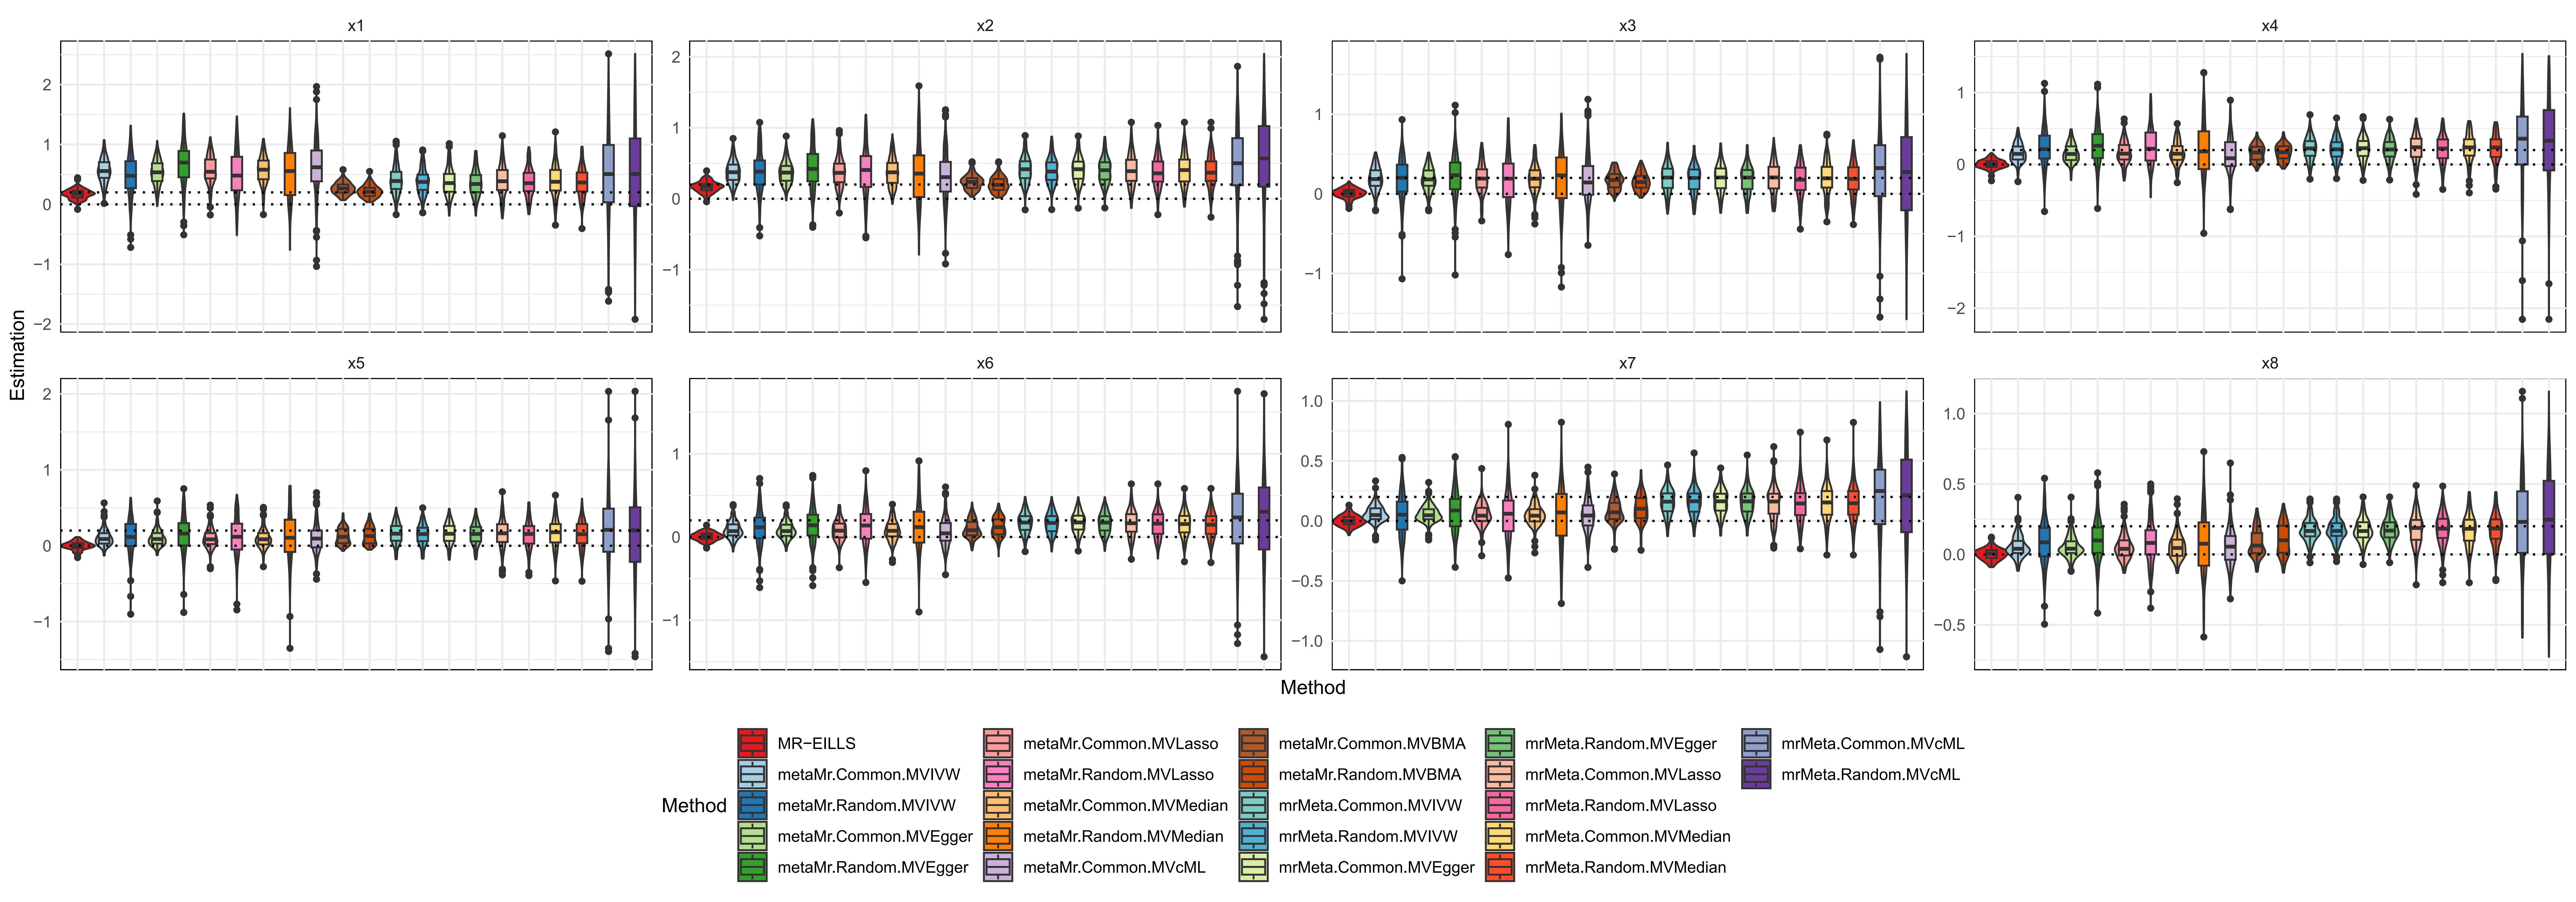


### Figure S26. Causal effects’ estimation when proportion of invalid IVs is 80%, g=100, E=3, P=8


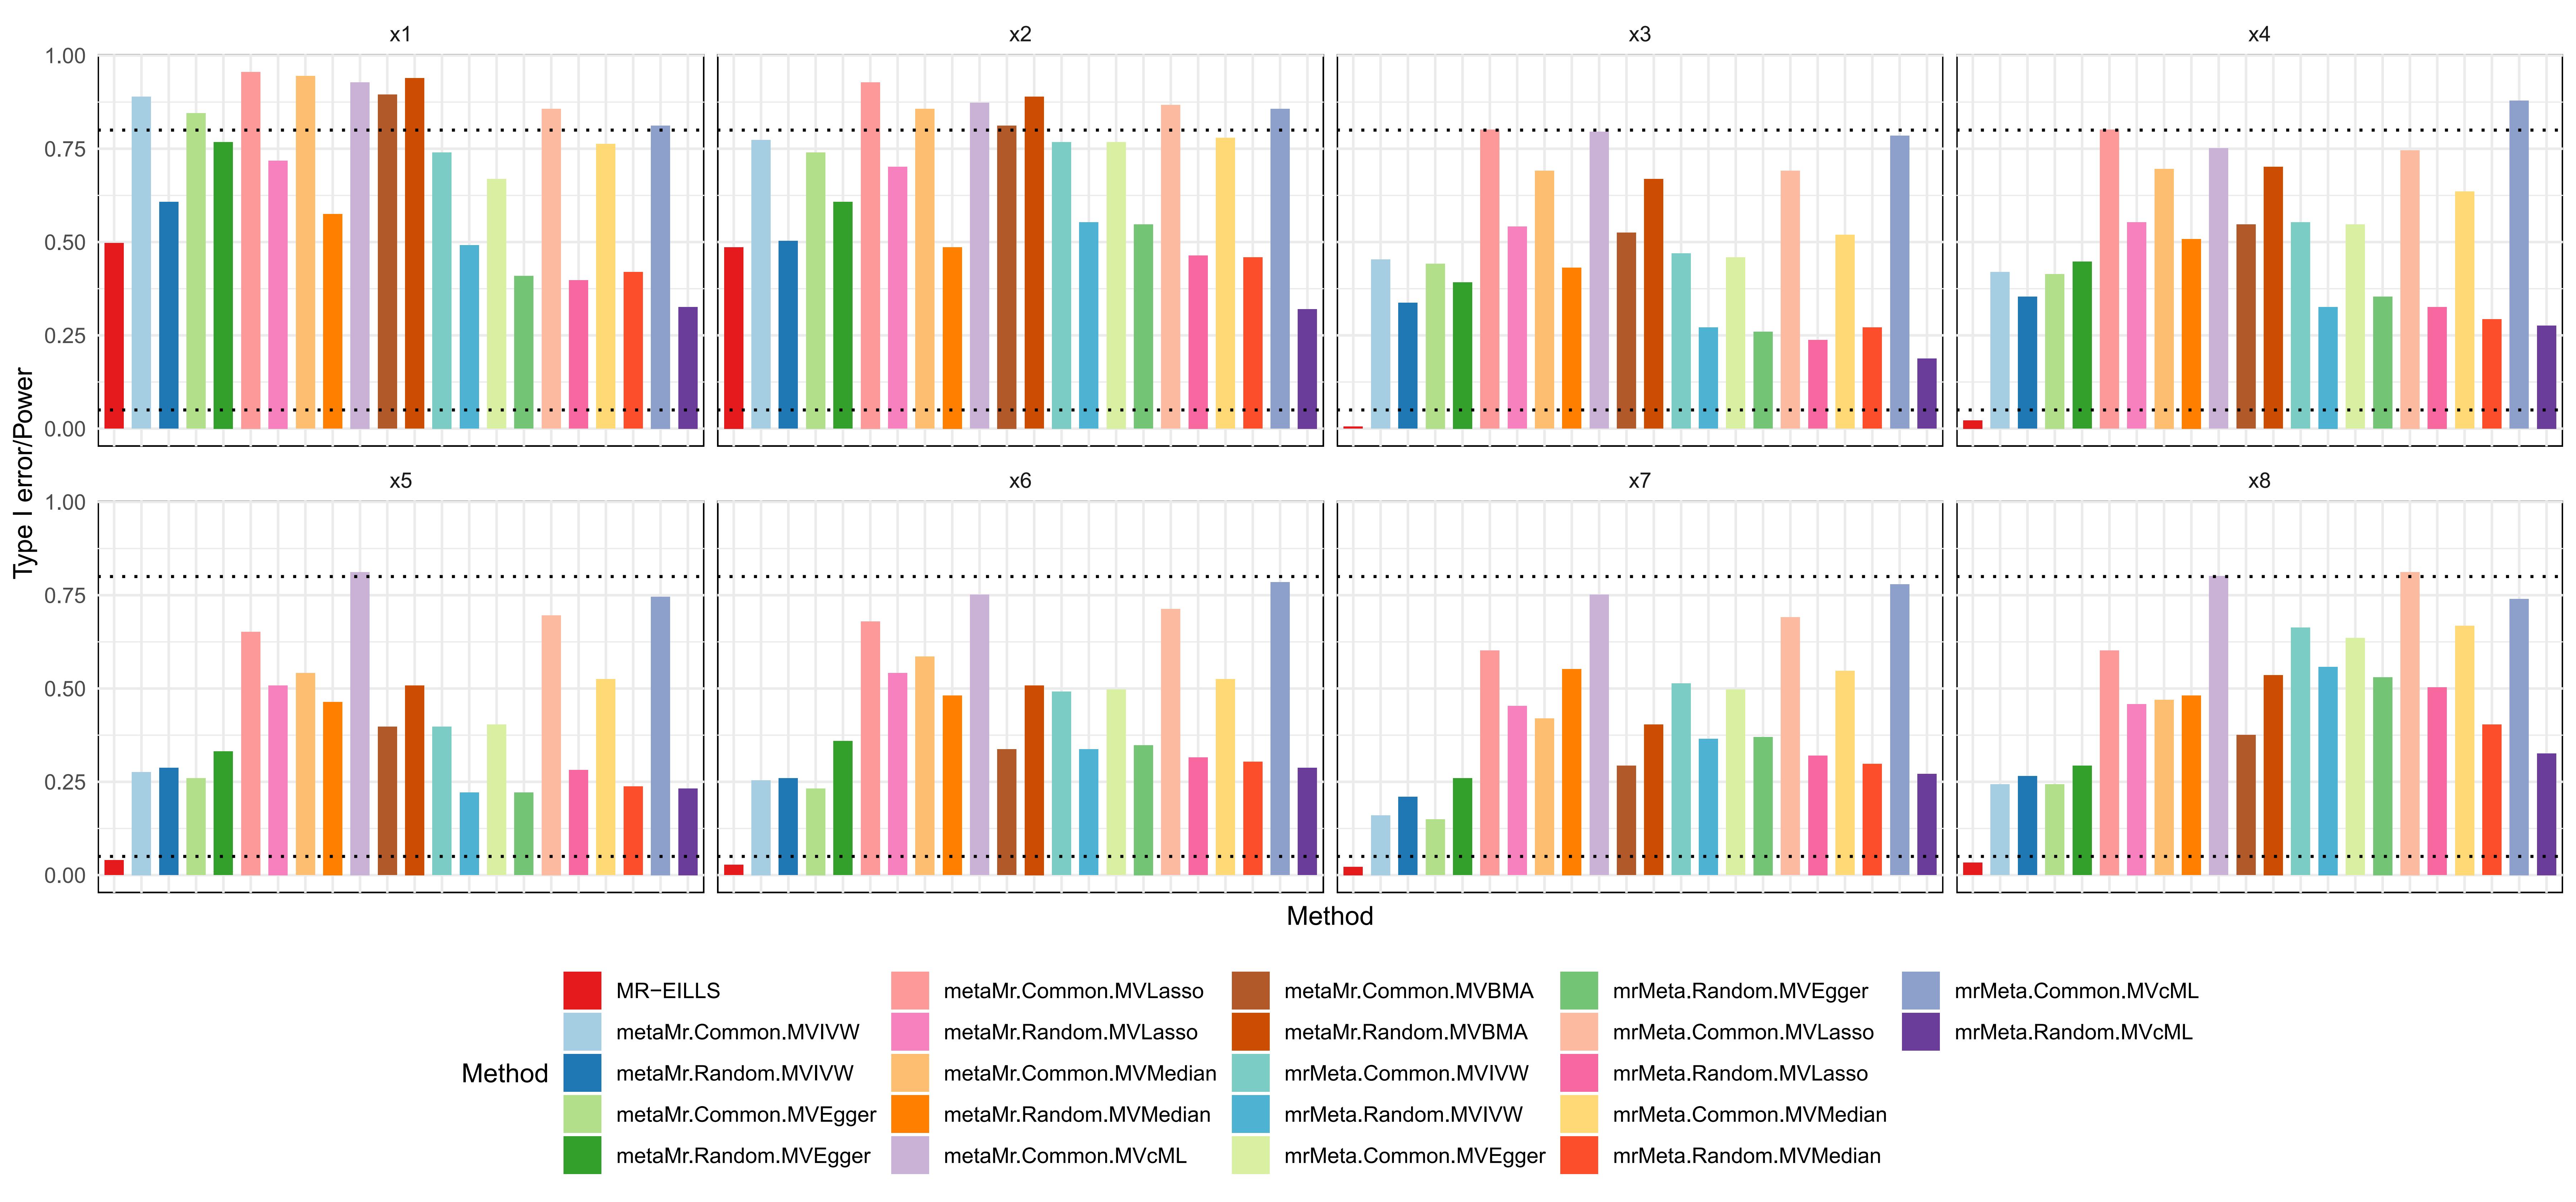


### Figure S27. Type I error/Power of causal effects’ estimation when proportion of invalid IVs is 80%, g=100, E=3, P=8


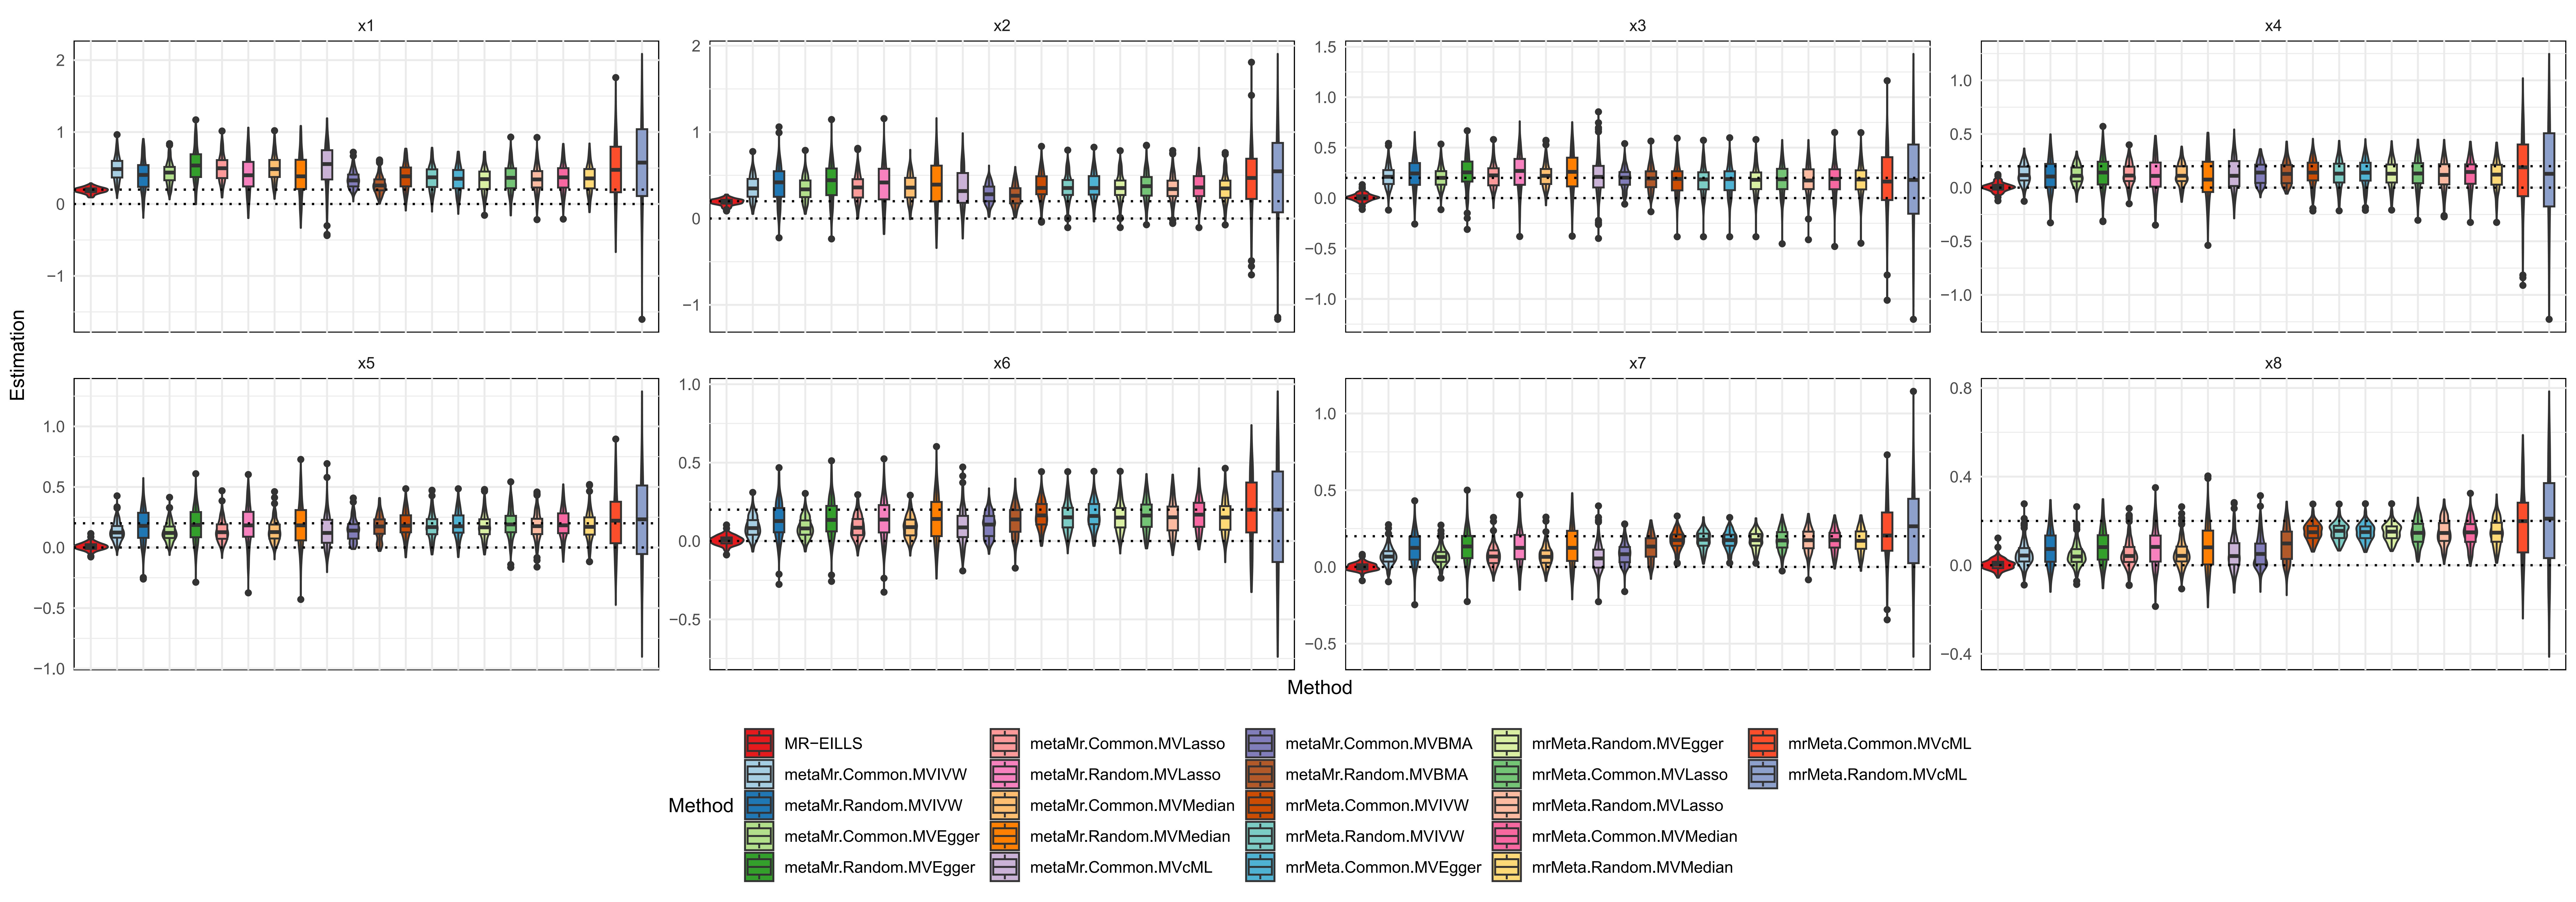


### Figure S28. Causal effects’ estimation when proportion of invalid IVs is 80%, g=300, E=3, P=8


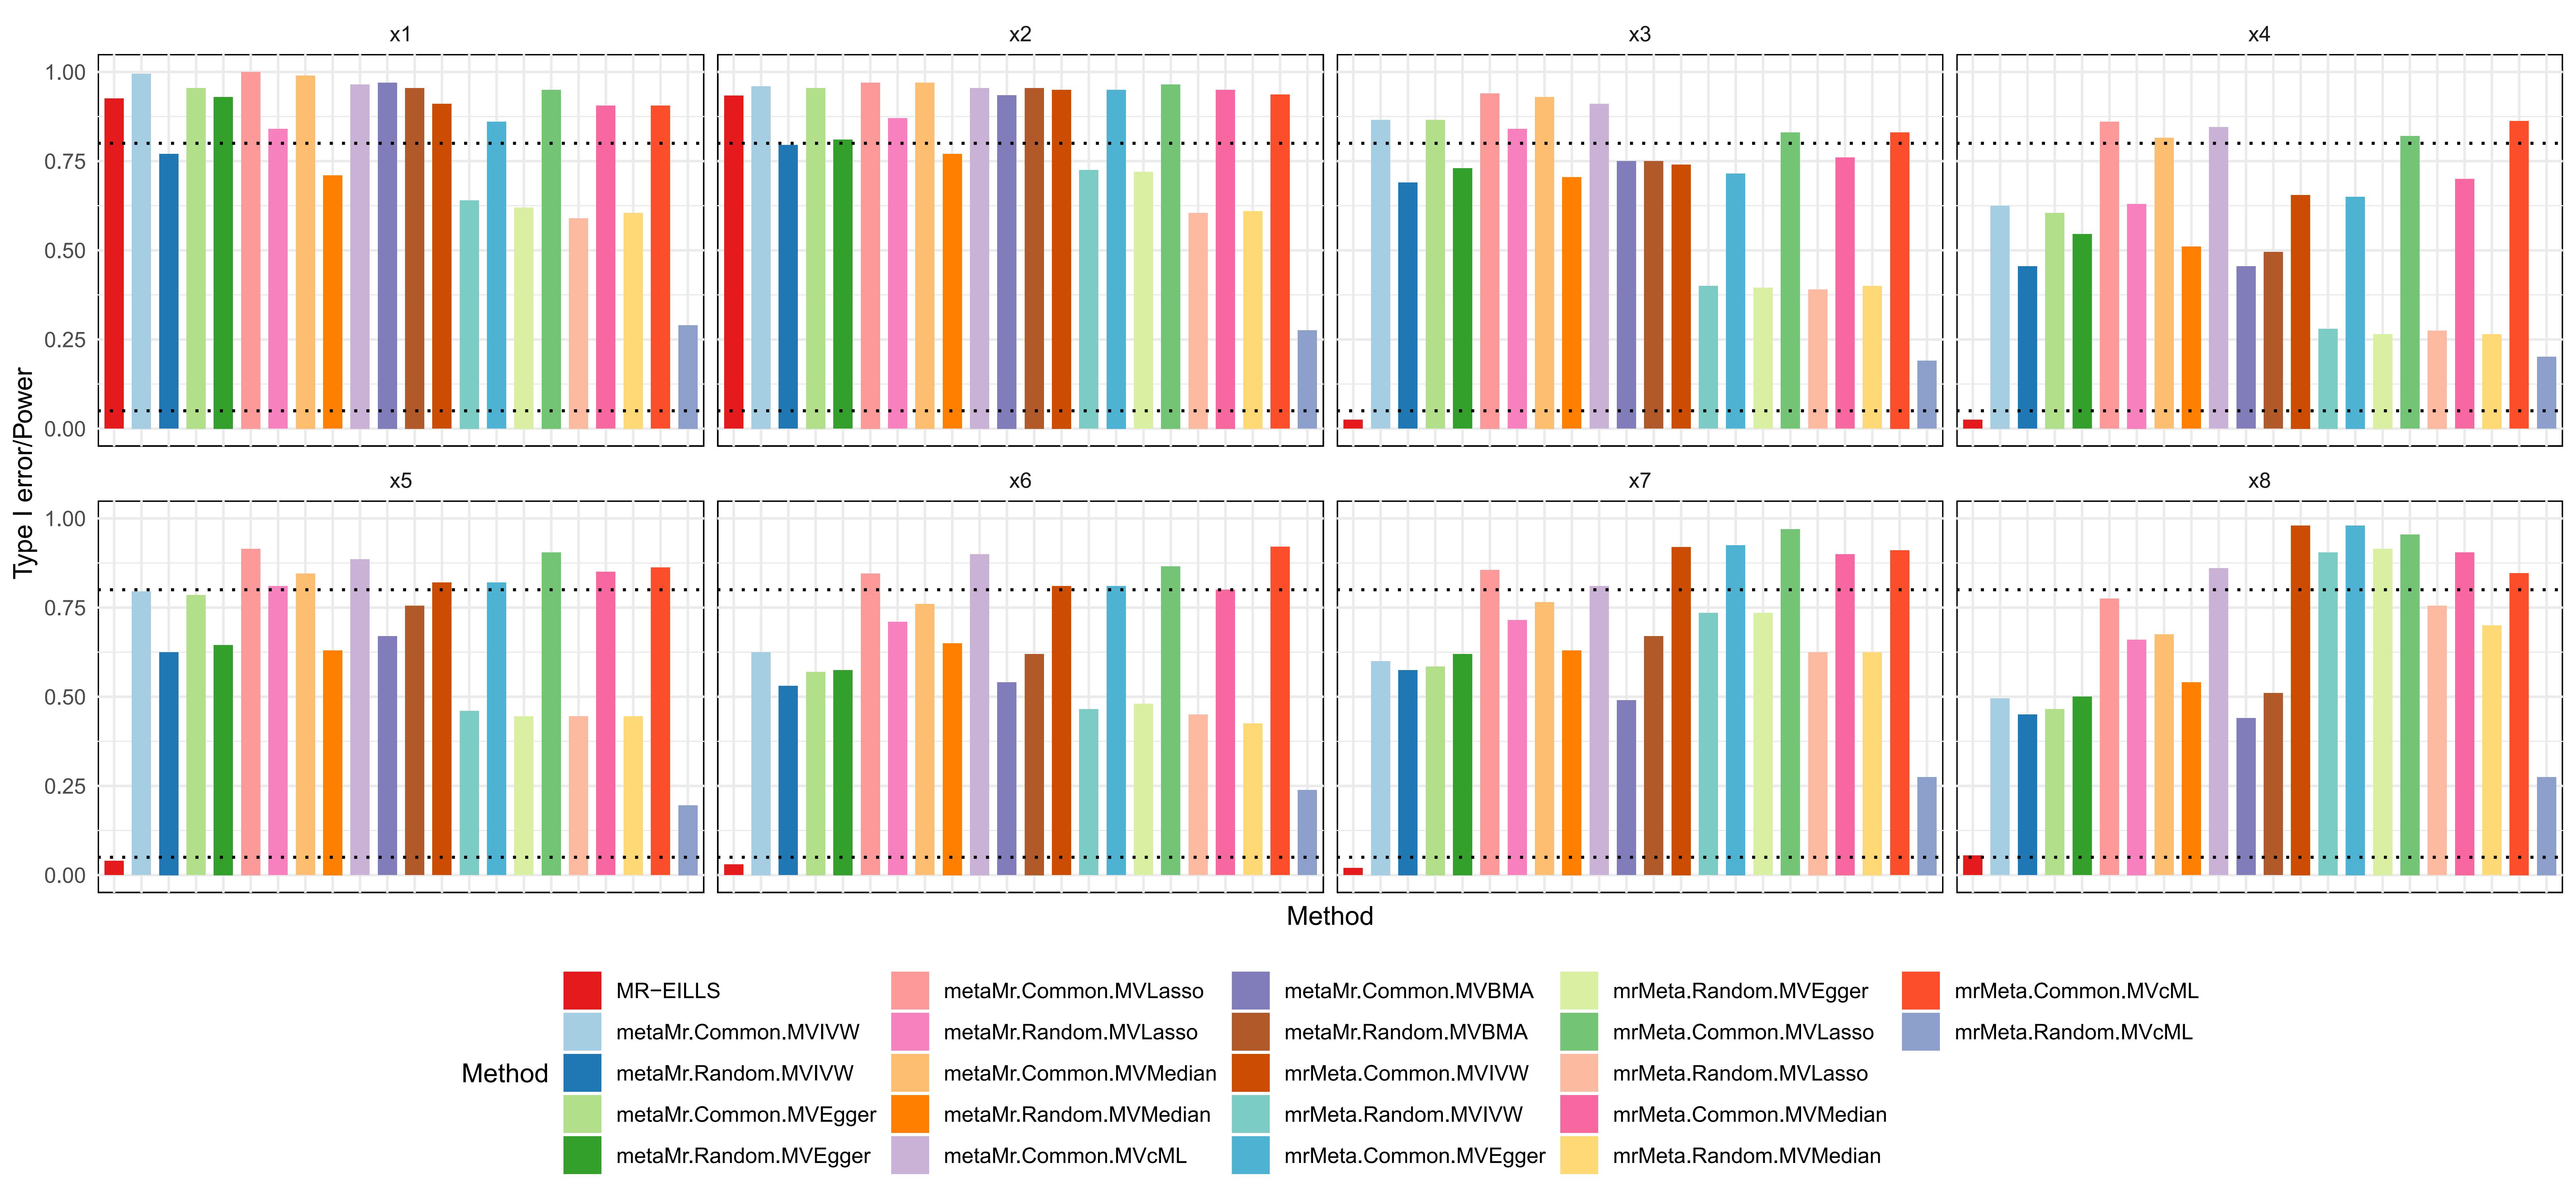


### Figure S29. Type I error/Power of causal effects’ estimation when proportion of invalid IVs is 80%, g=300, E=3, P=8

## 5.2 Measurement of heterogeneity between datasets


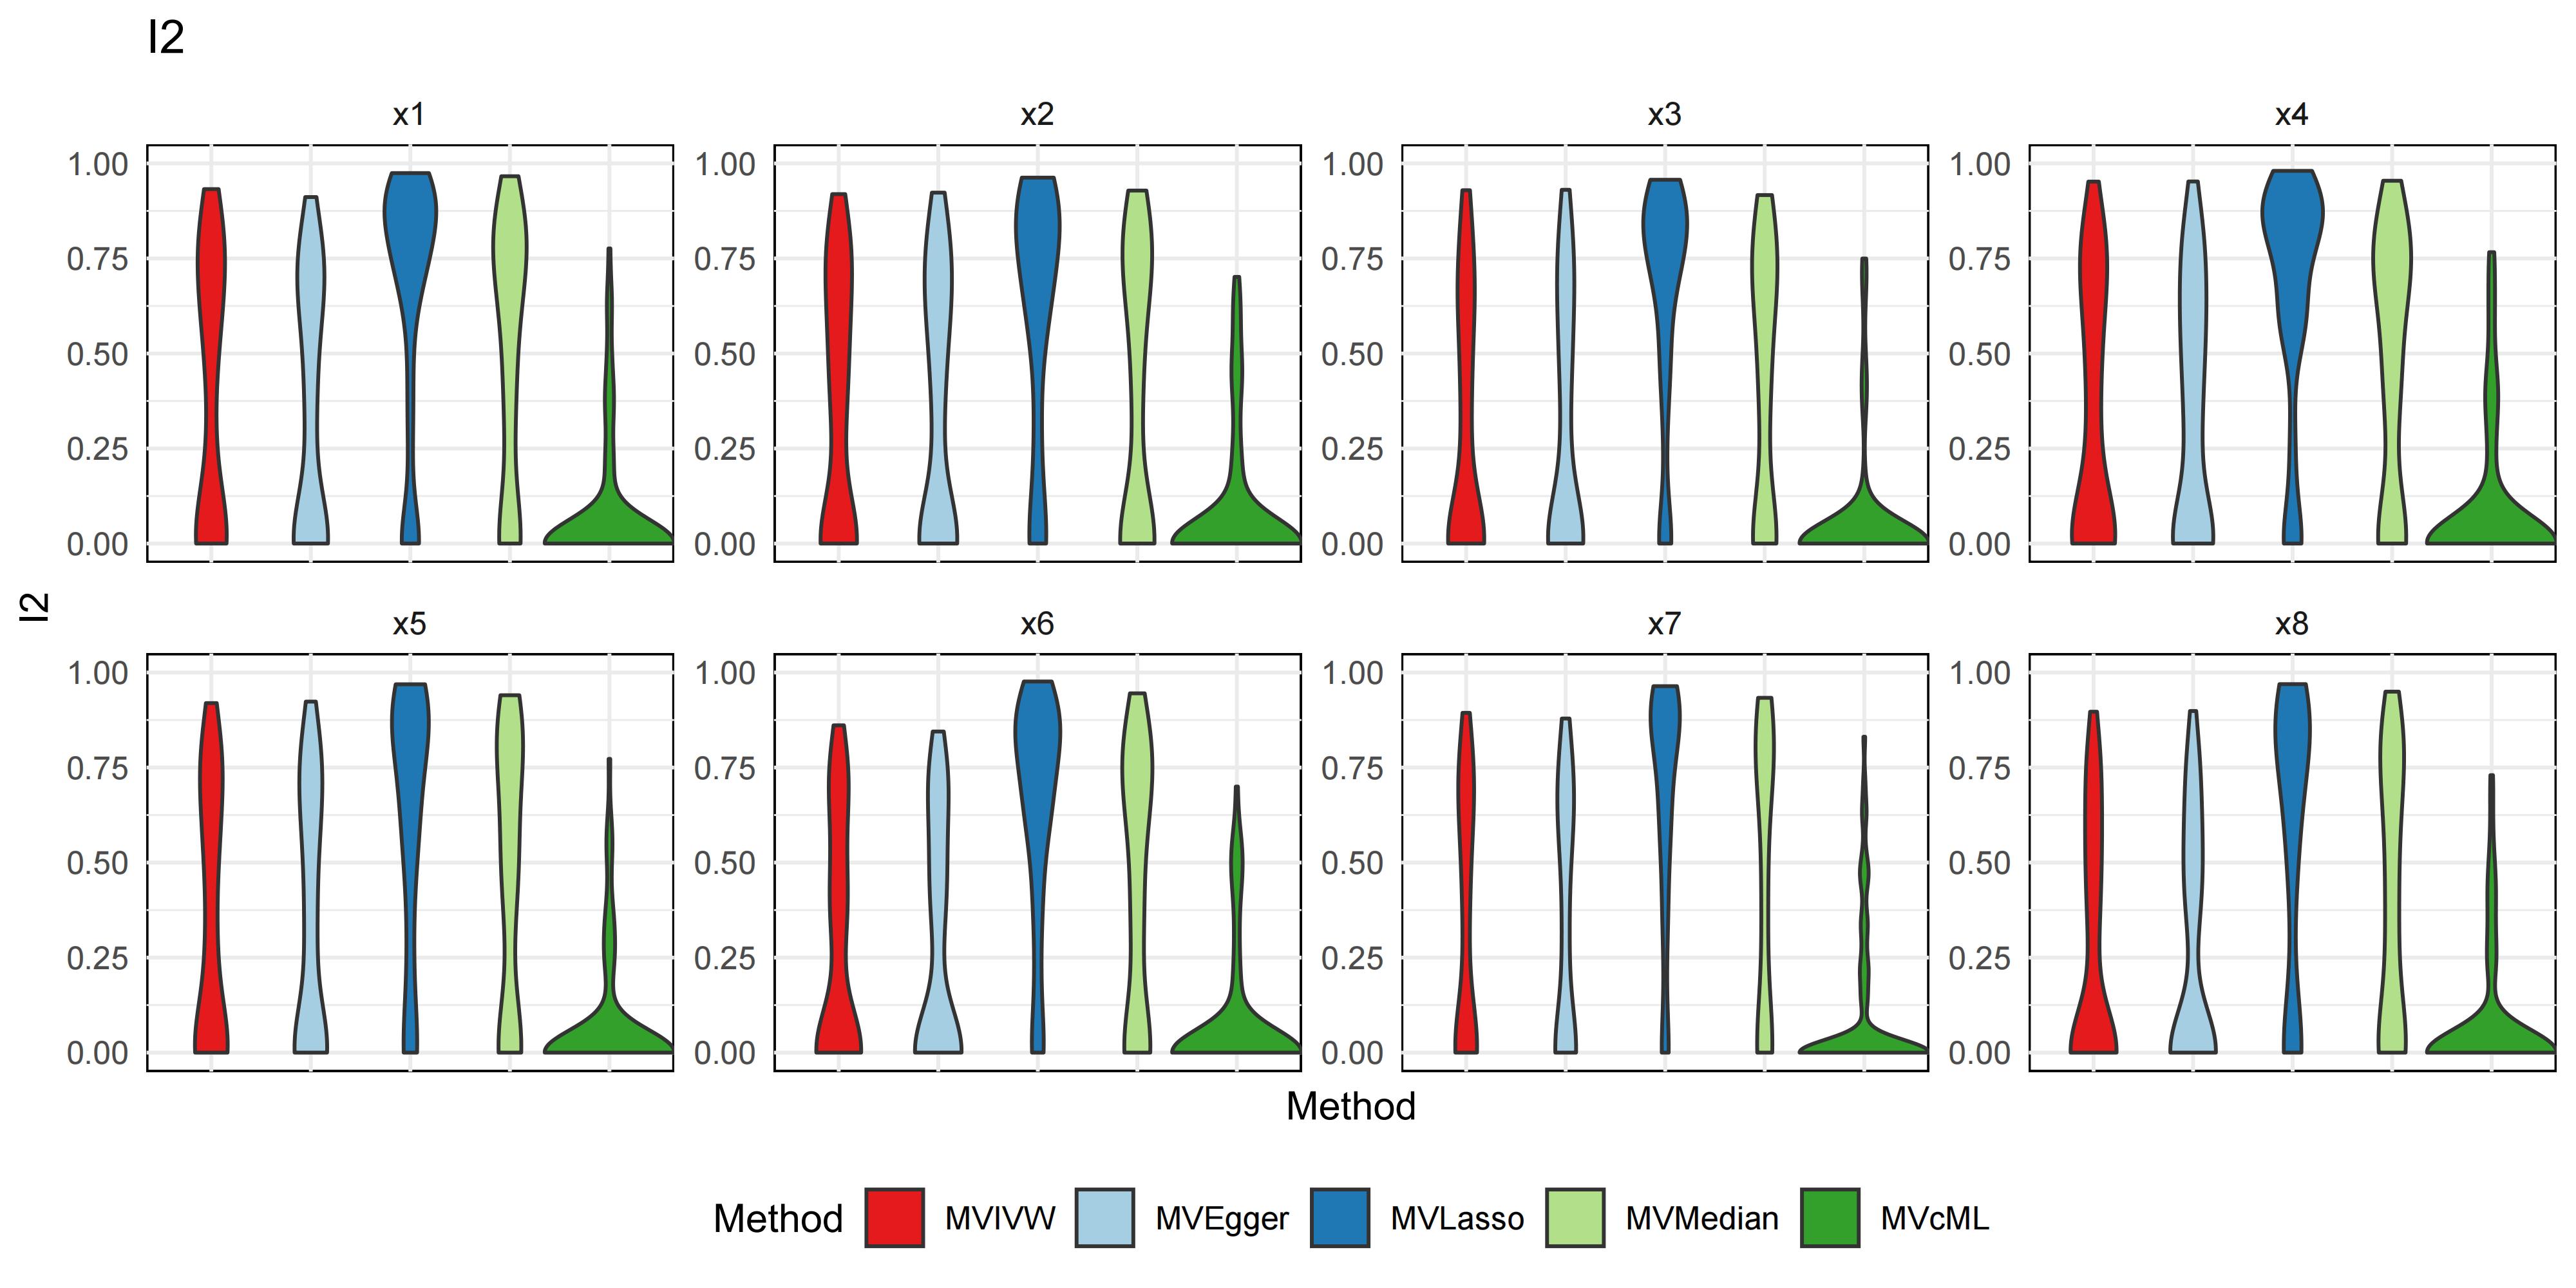


### Figure S30. of causal effect estimations in datasets

We randomly select one simulation and demonstrate its causal effects’ estimation for each MR methods and each dataset in Figure S31. The summary of for each simulation are shown in Table S1.


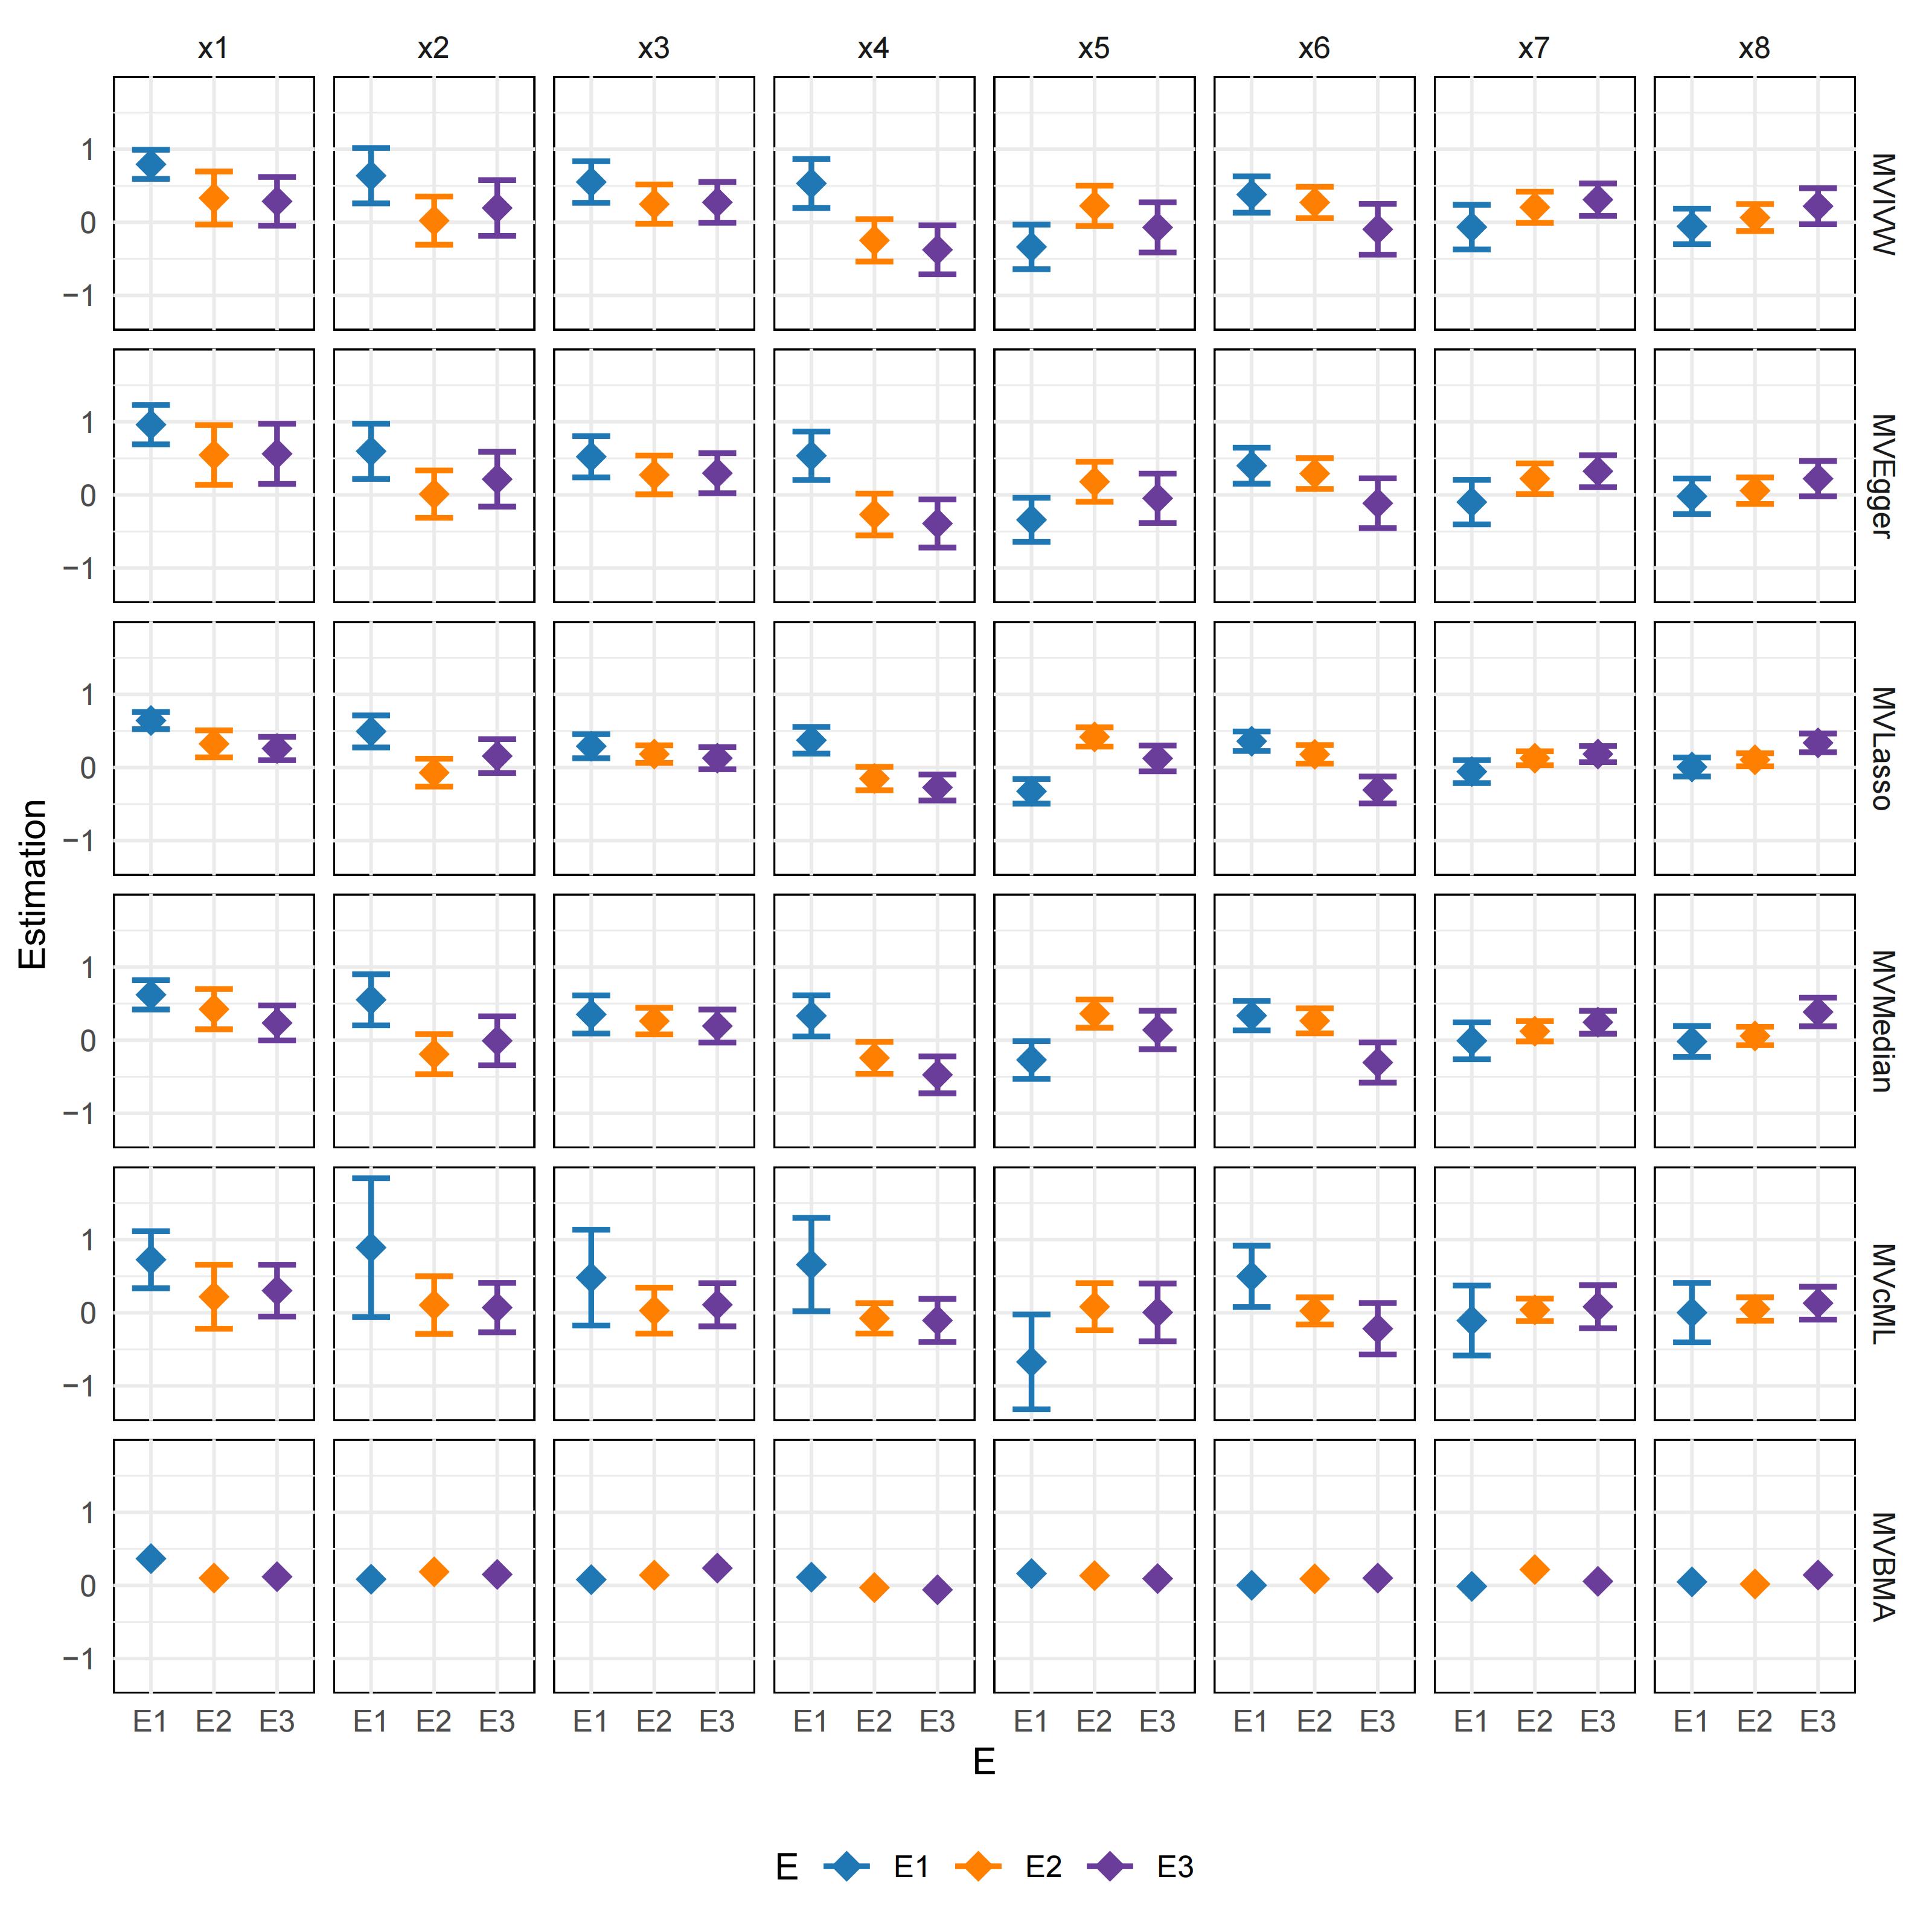


### Figure S31. Causal effects’ estimations in Simulation ID=4

# 6 MVMR Scenario (b): Uncorrelated pleiotropy

## 6.1 Performance of causal effect estimation


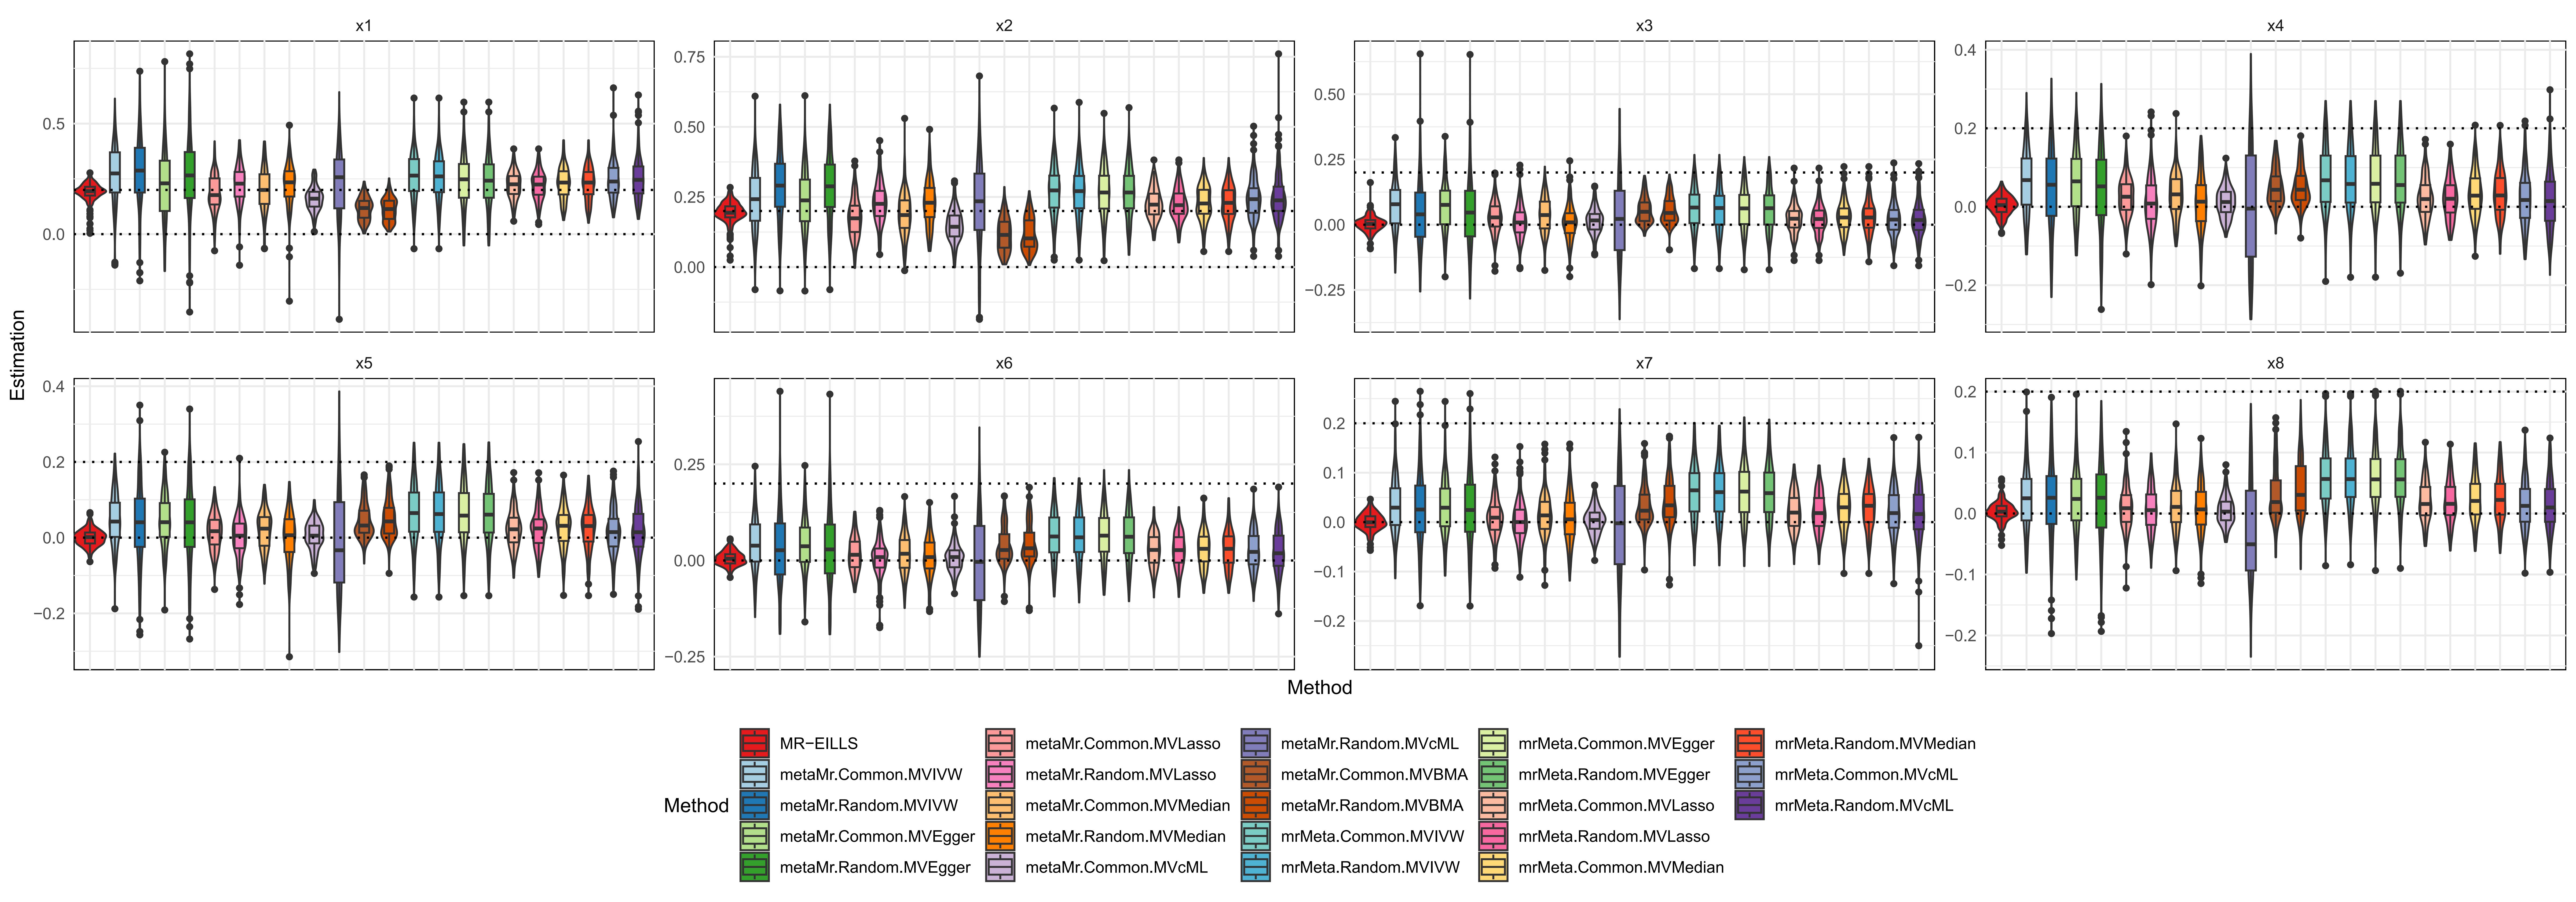


### Figure S32. Causal effects’ estimation when proportion of invalid IVs is 30%, g=100, E=3, P=8


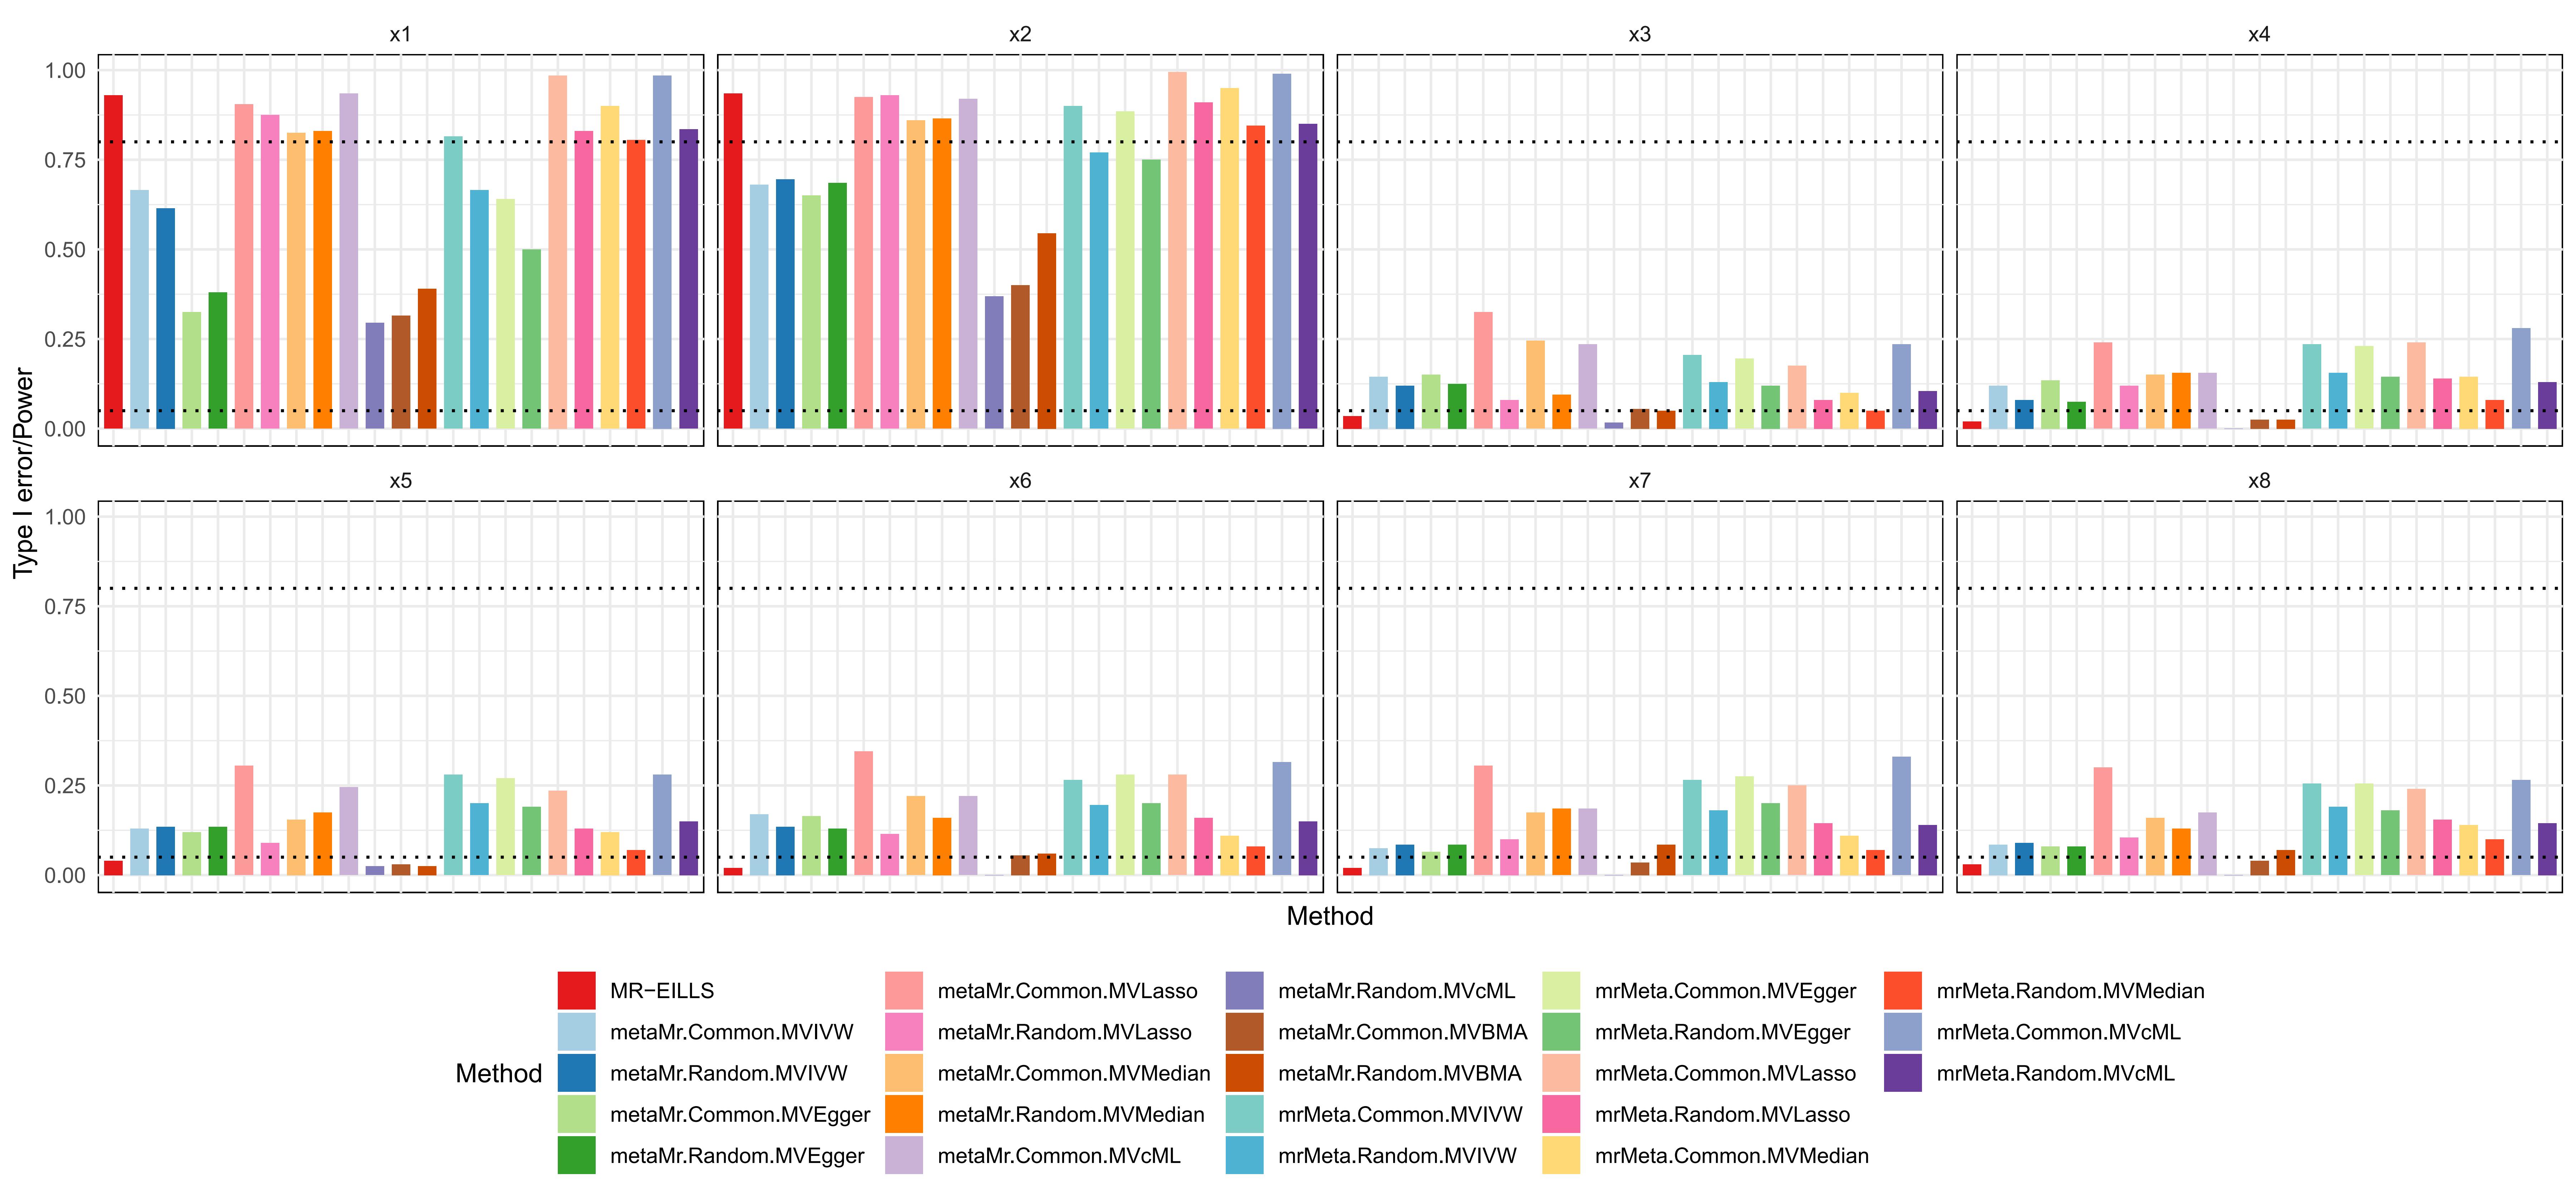


### Figure S33. Type I error/Power of causal effects’ estimation when proportion of invalid IVs is 30%, g=100, E=3, P=8


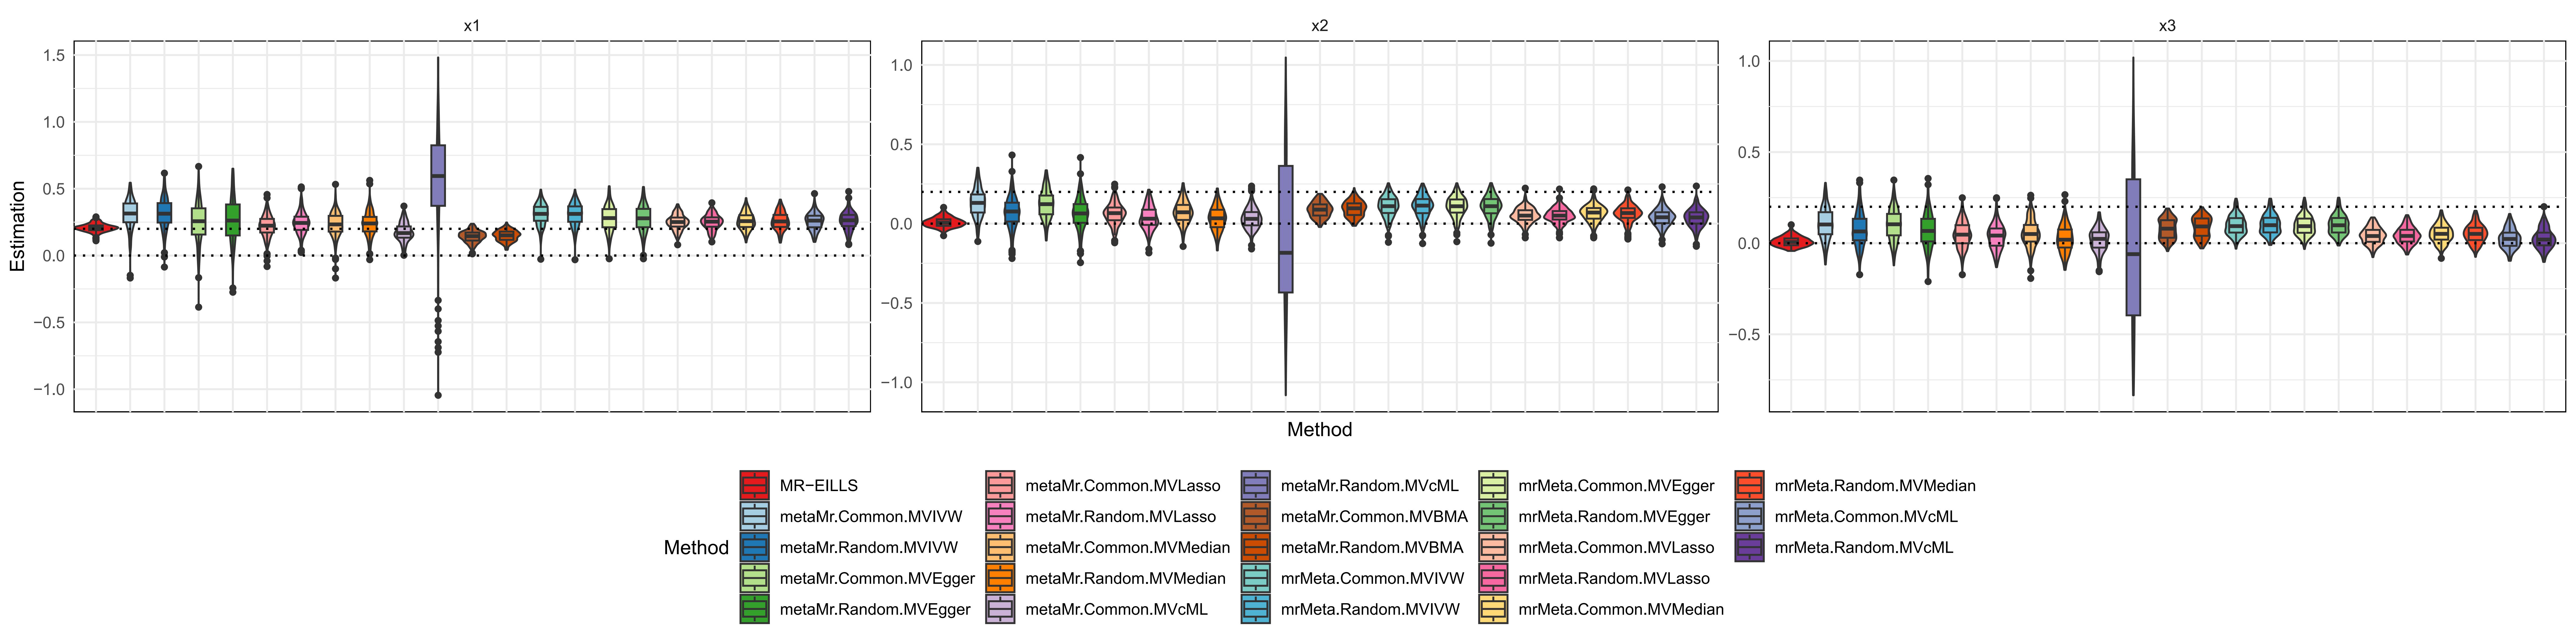


### Figure S34. Causal effects’ estimation when proportion of invalid IVs is 30%, g=100, E=3, P=3


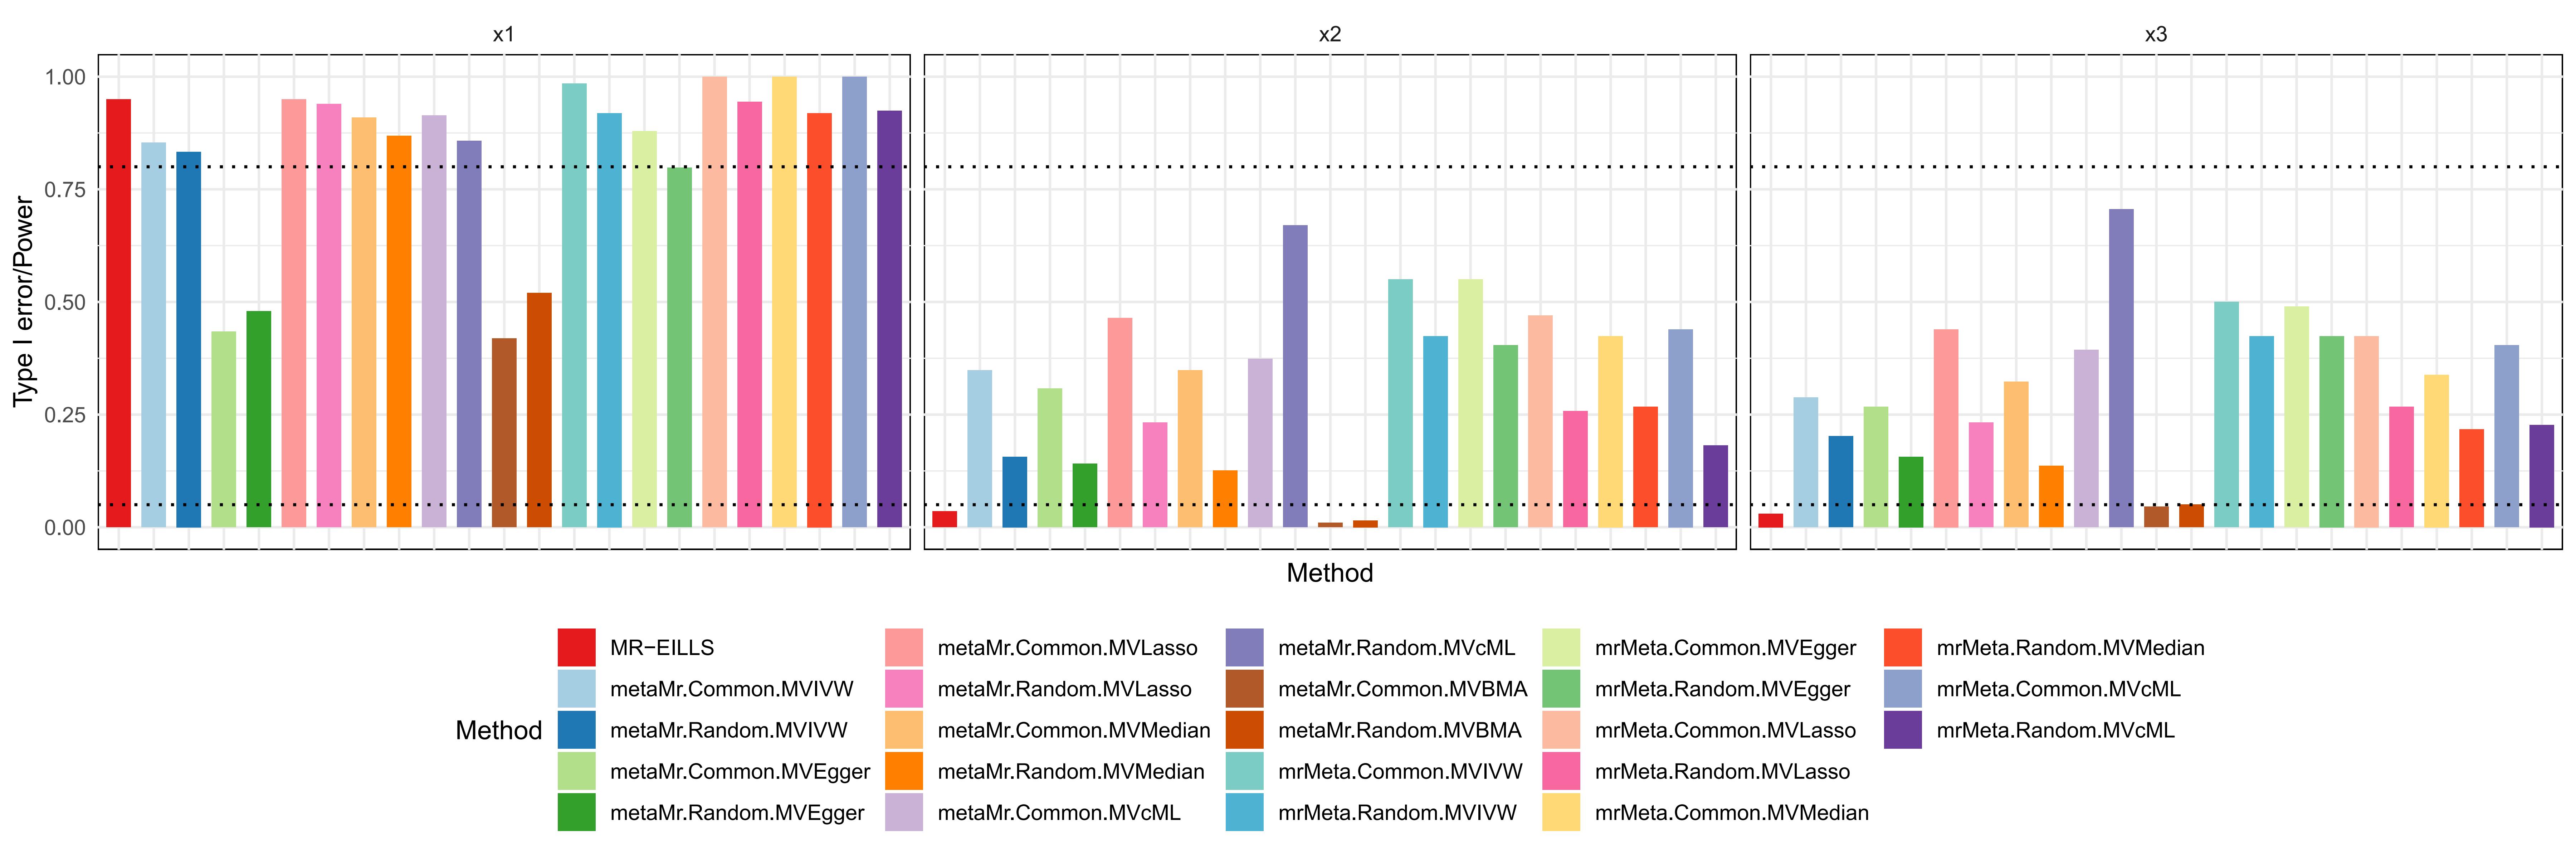


### Figure S35. Type I error/Power of causal effects’ estimation when proportion of invalid IVs is 30%, g=100, E=3, P=3

## 6.2 Measurement of heterogeneity between datasets


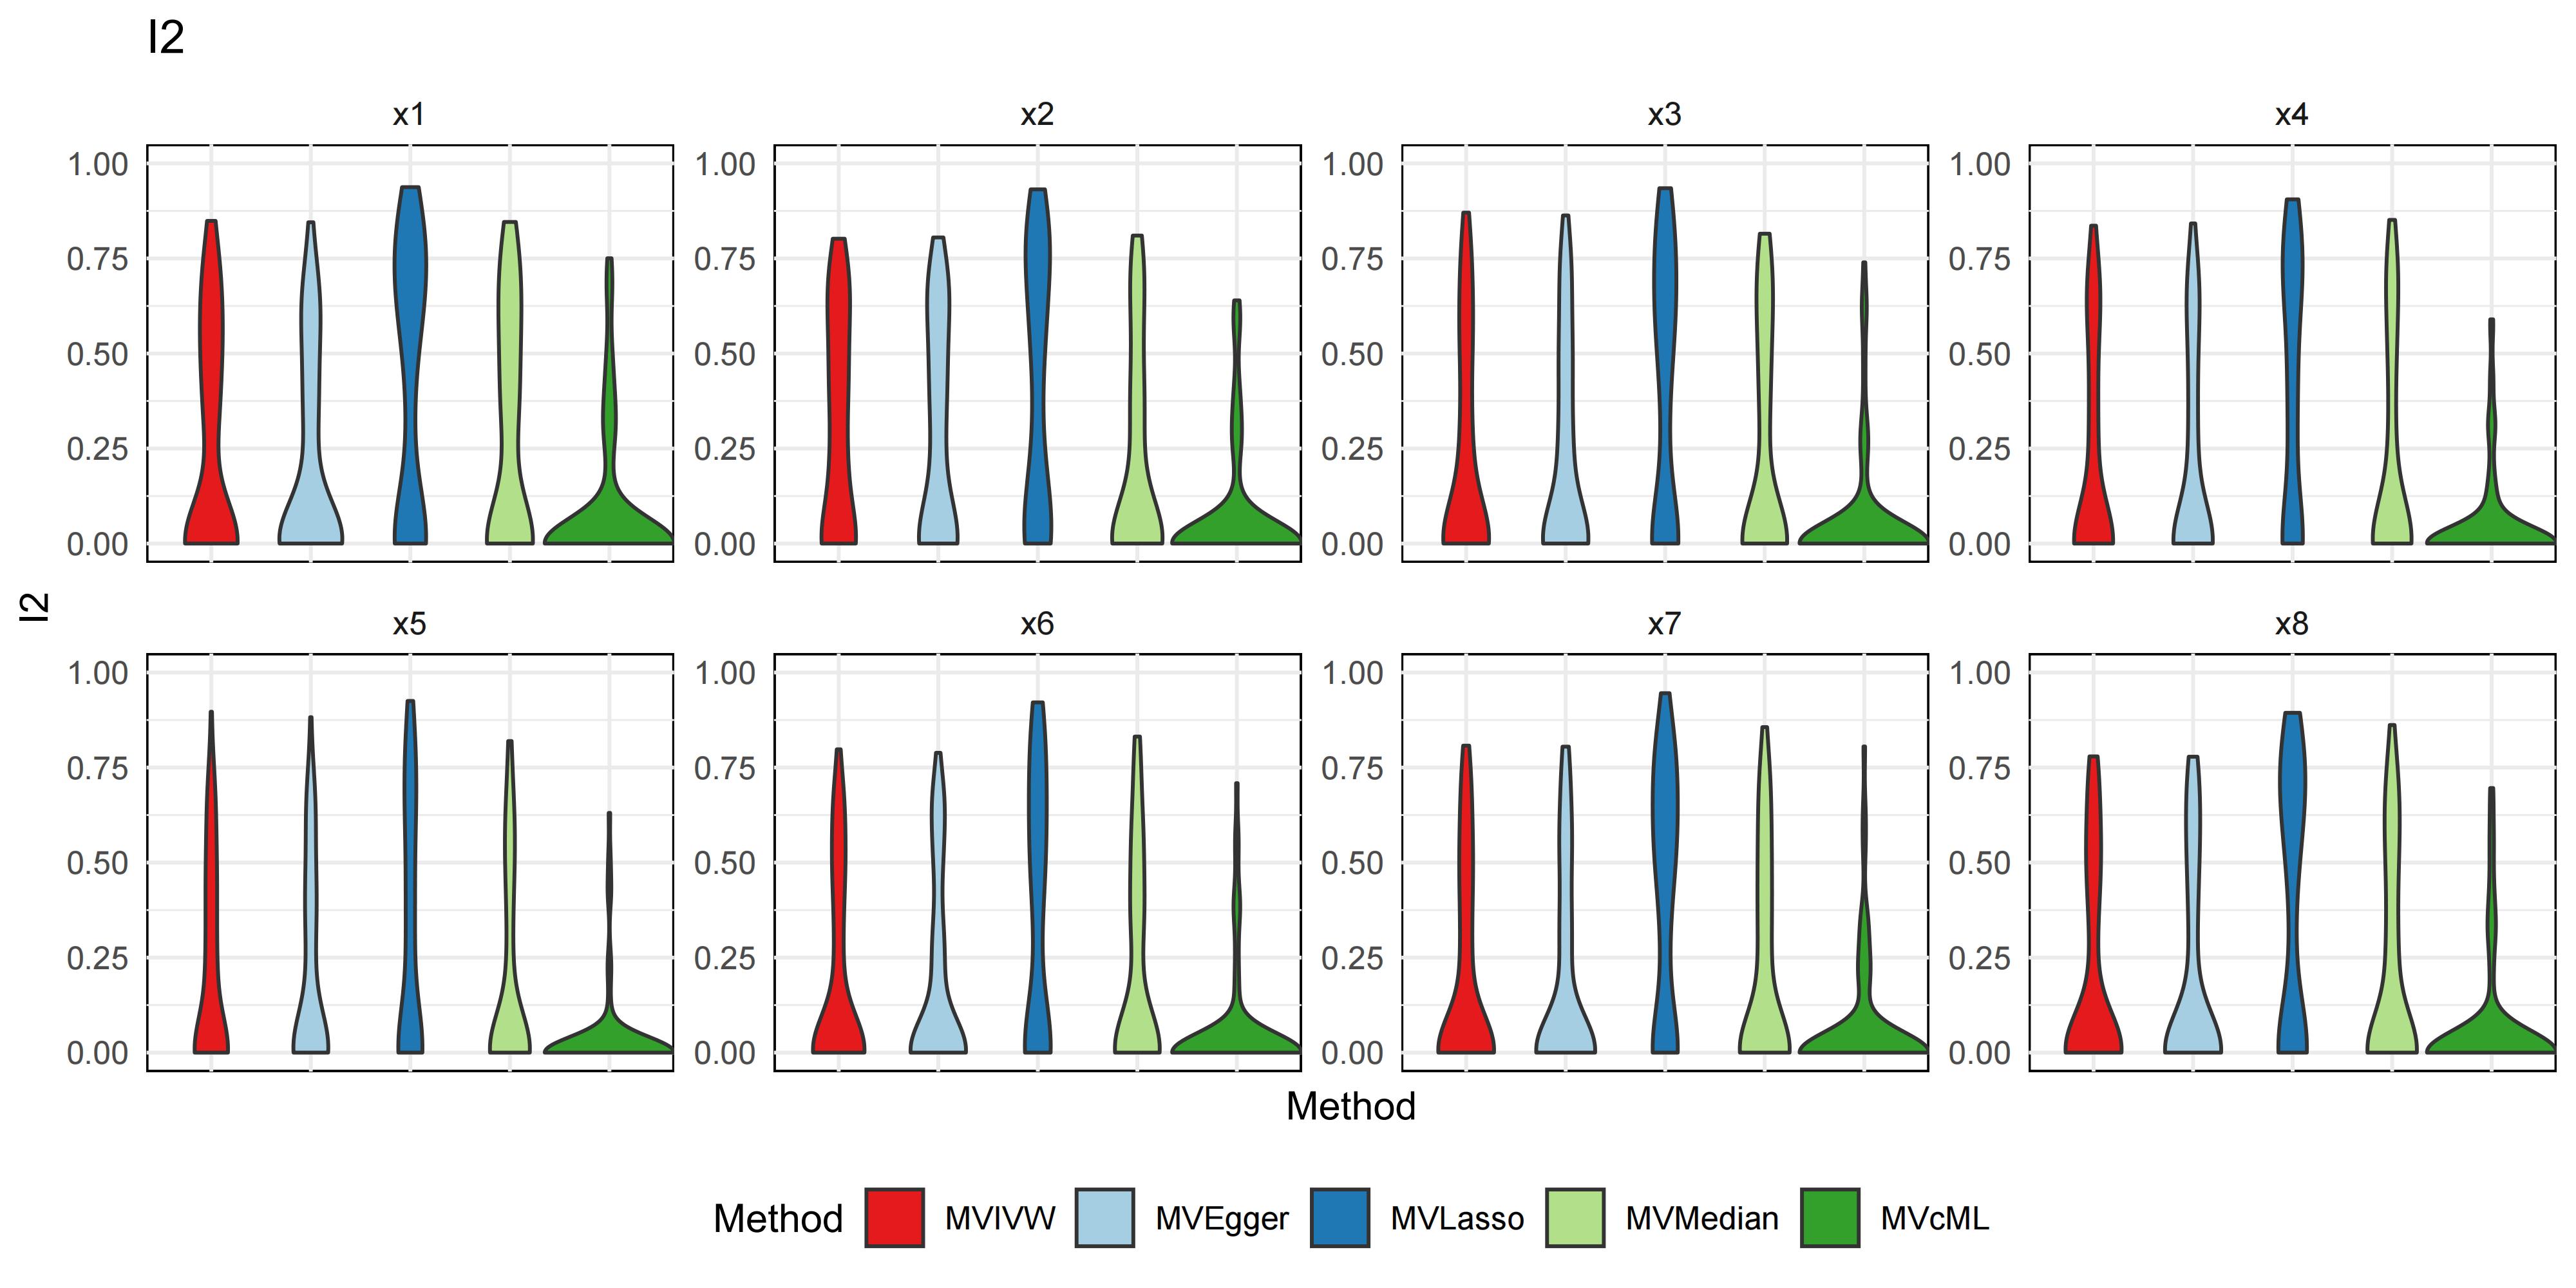


### Figure S36. of causal effect estimations in datasets in Figure S6

We randomly select one simulation and demonstrate its causal effects’ estimation for each MR methods and each dataset in Figure S37. The summary of for each simulation are shown in Table S2.


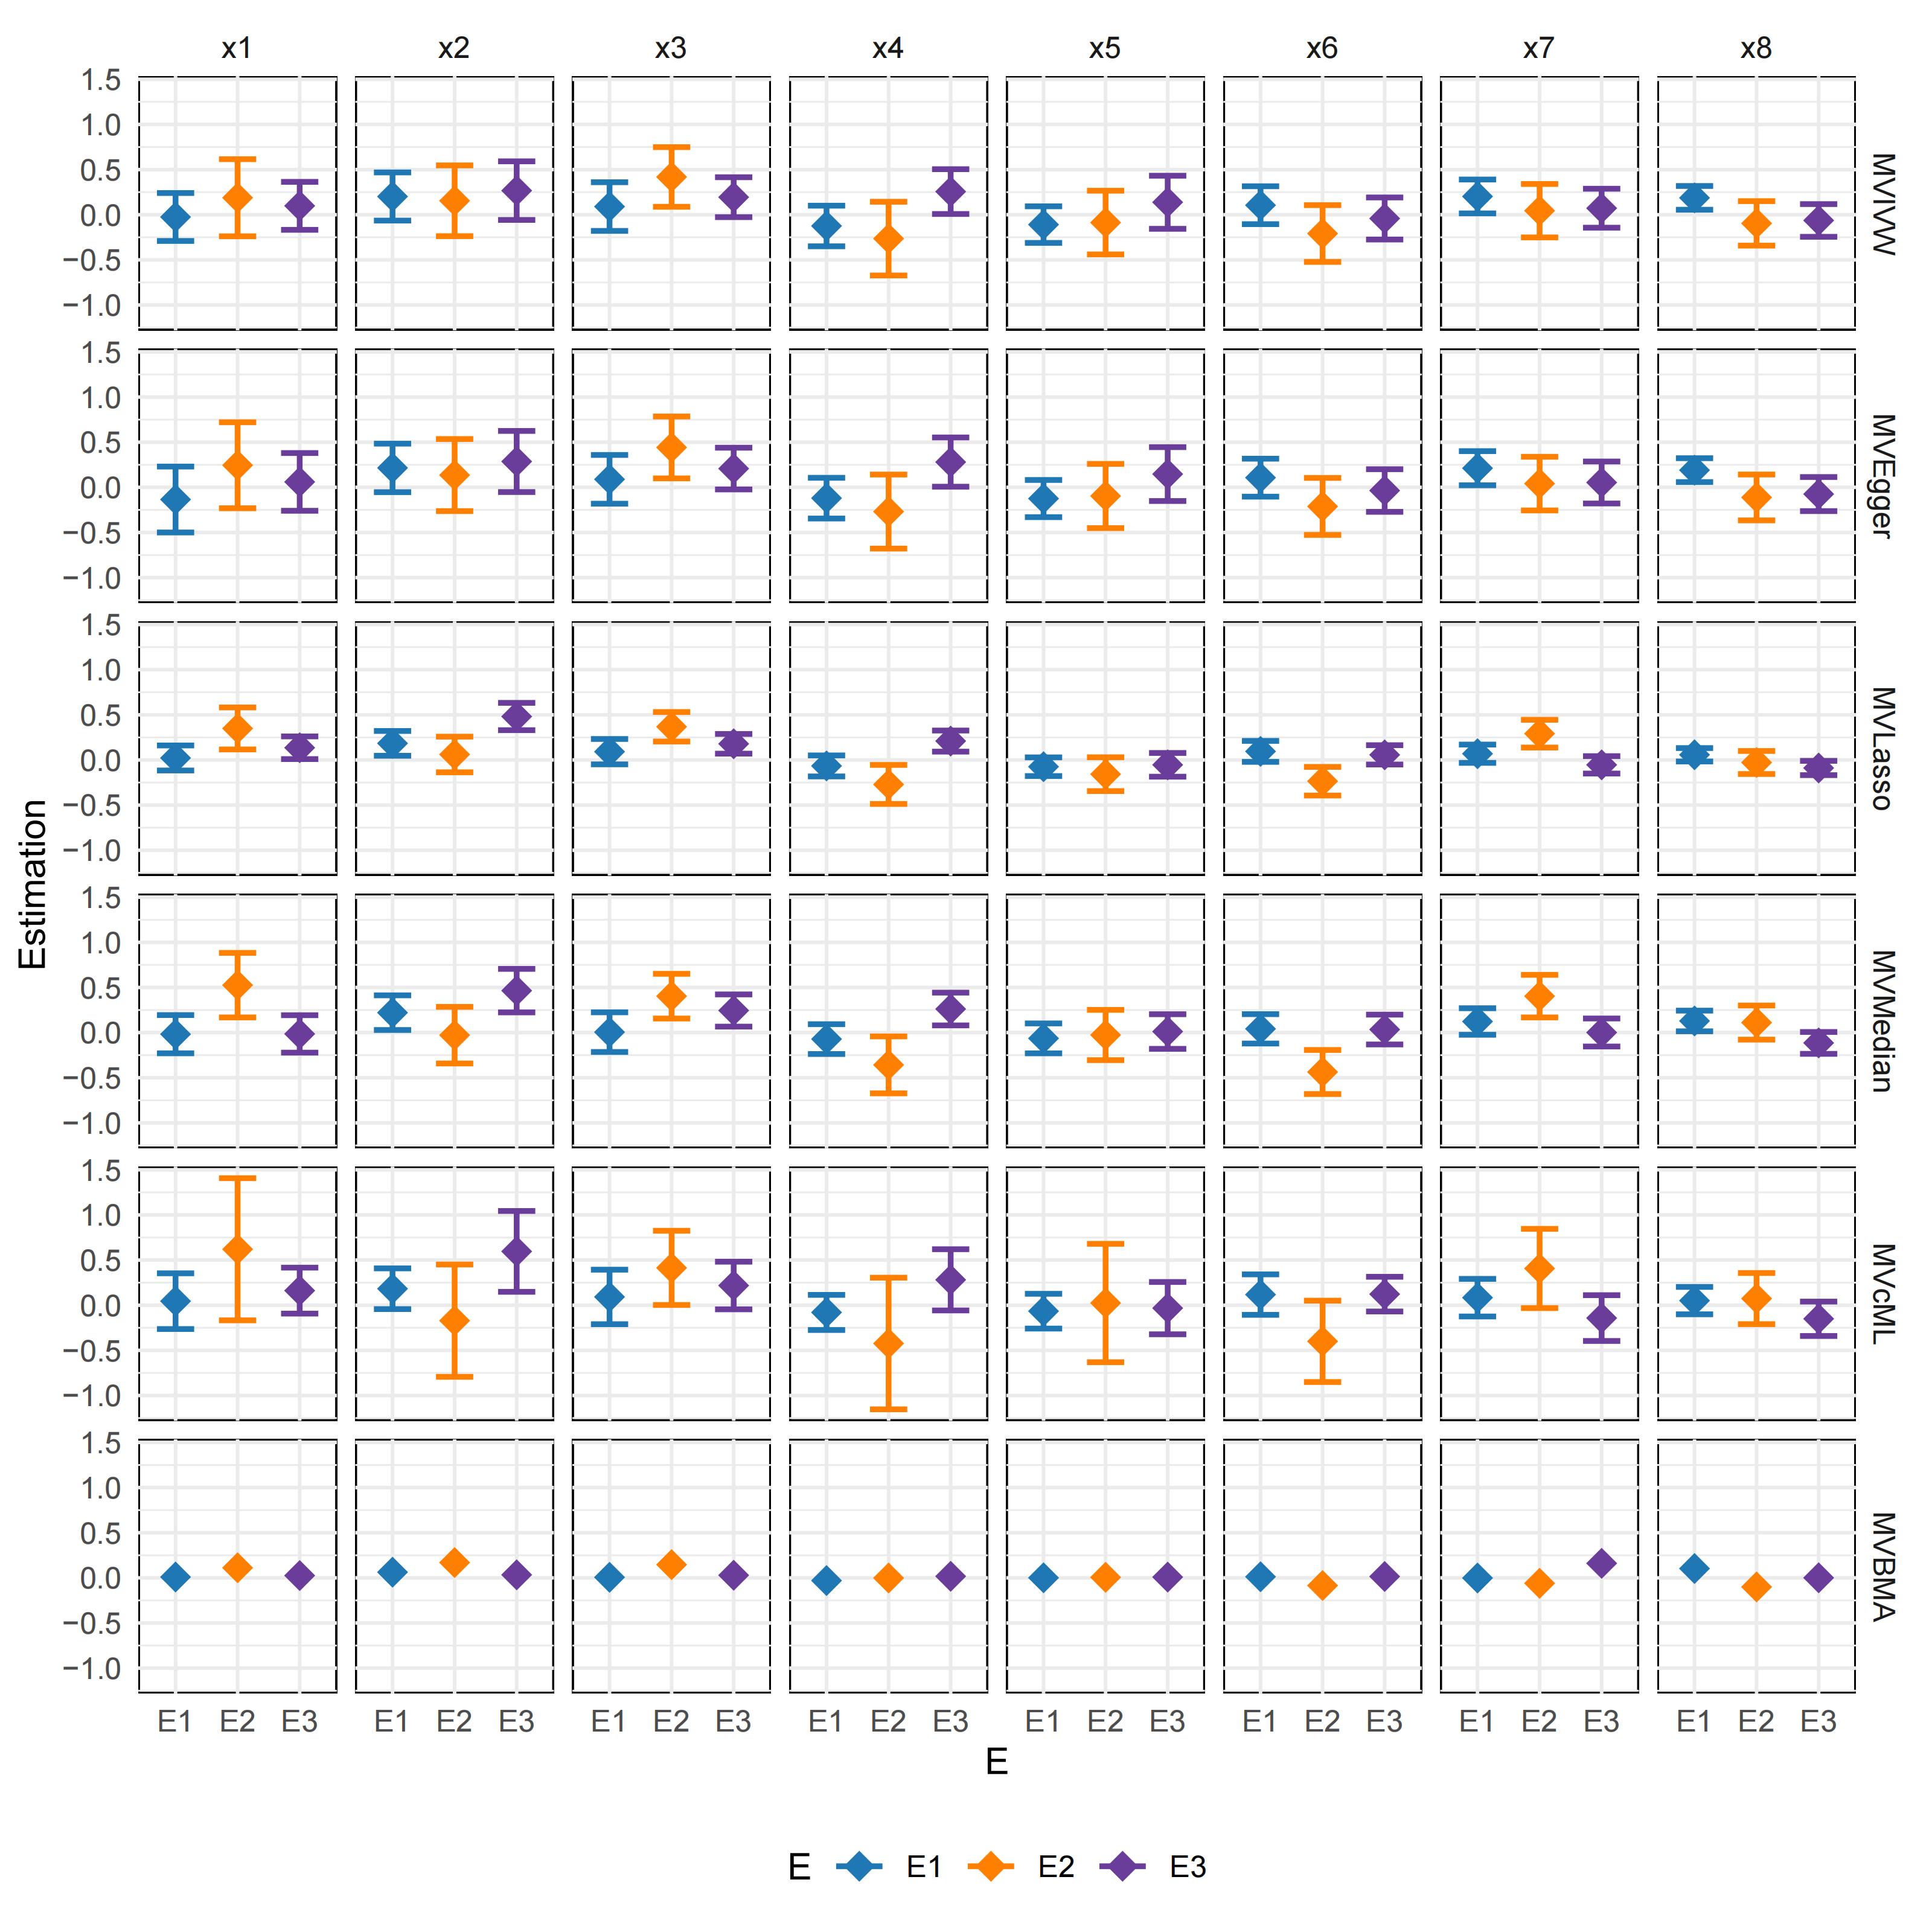


### Figure S37. Causal effects’ estimations in Simulation ID=17

# 7 MVMR Scenario (c): No pleiotropy

## 7.1 Performance of causal effect estimation


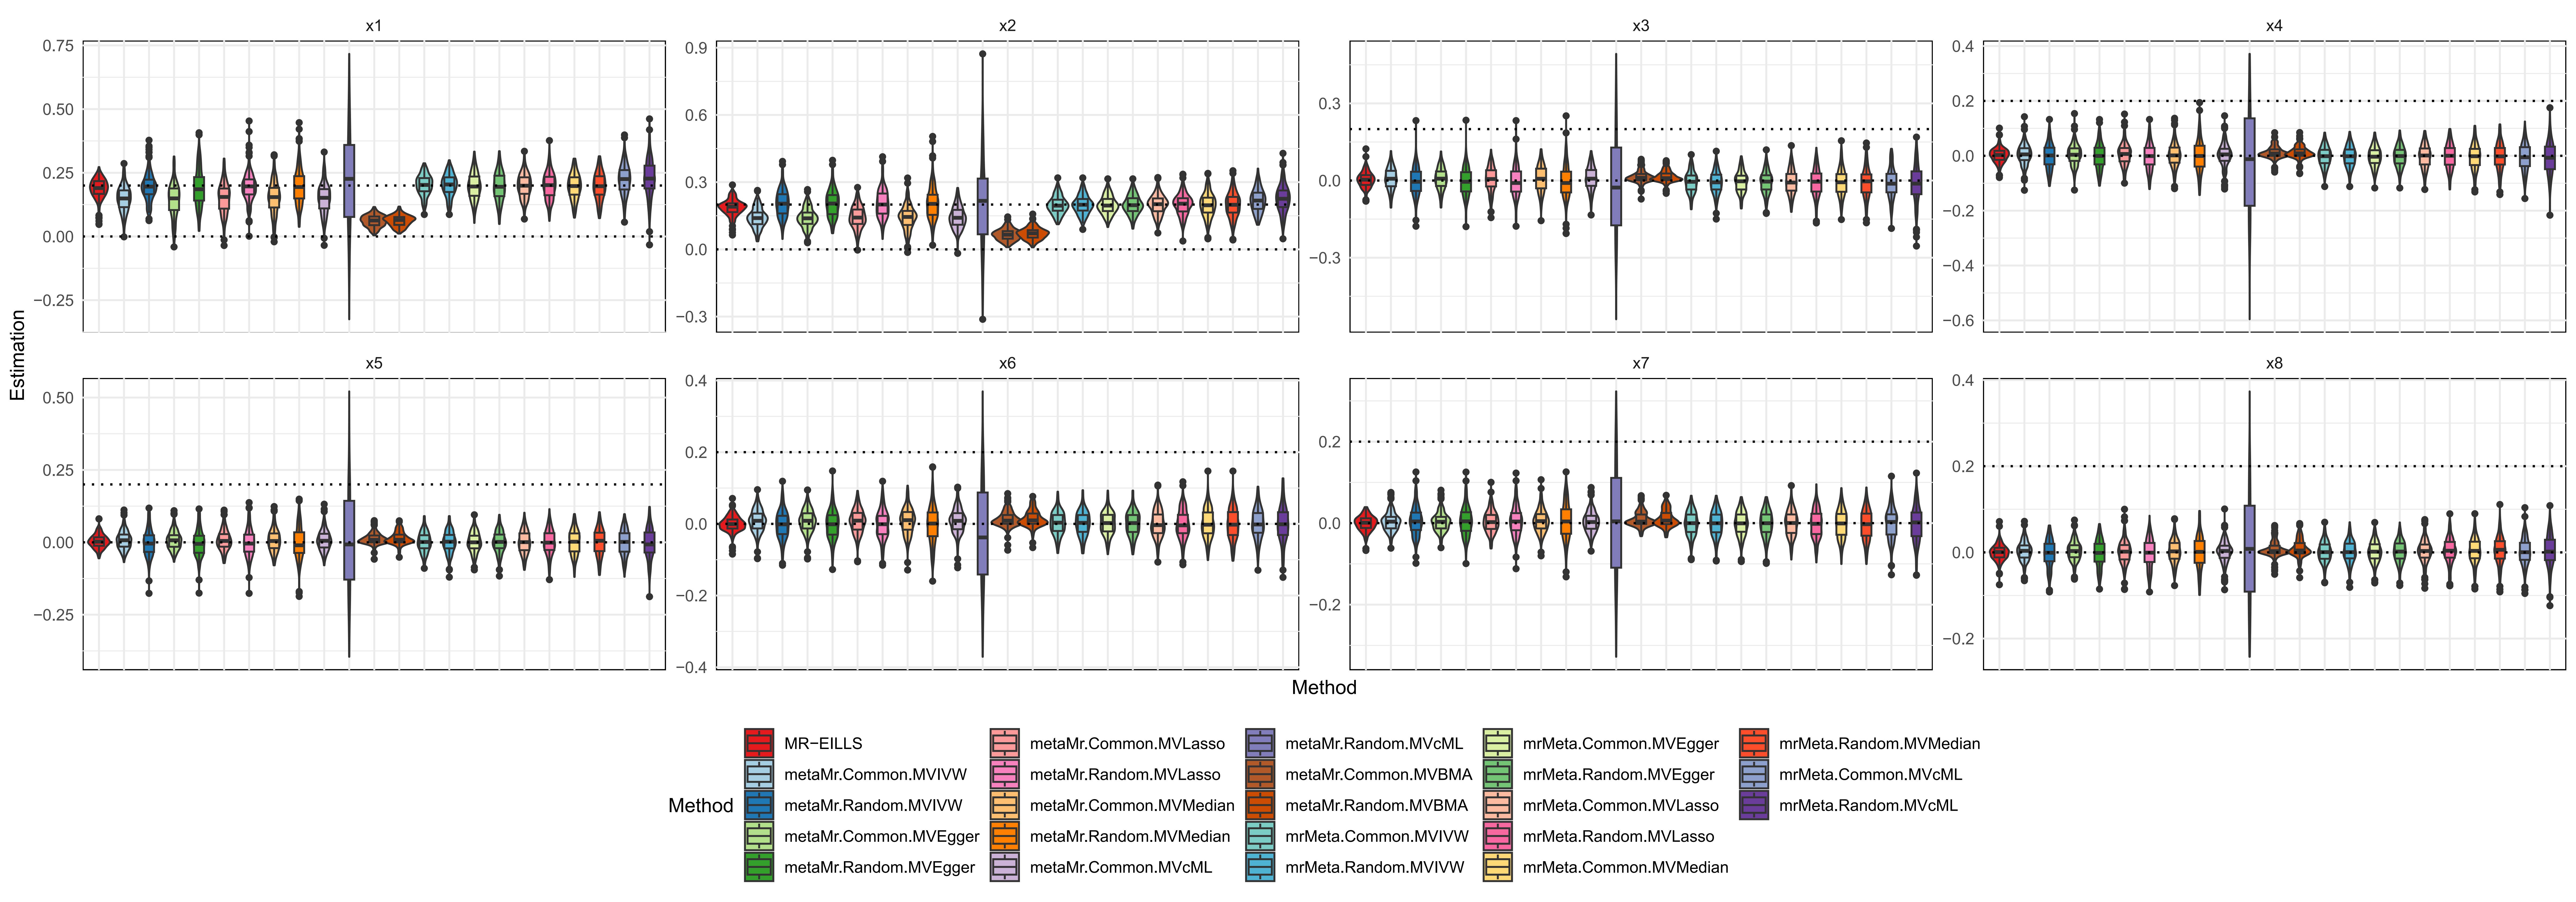


### Figure S38. Causal effects’ estimation when g=100, E=3, P=8


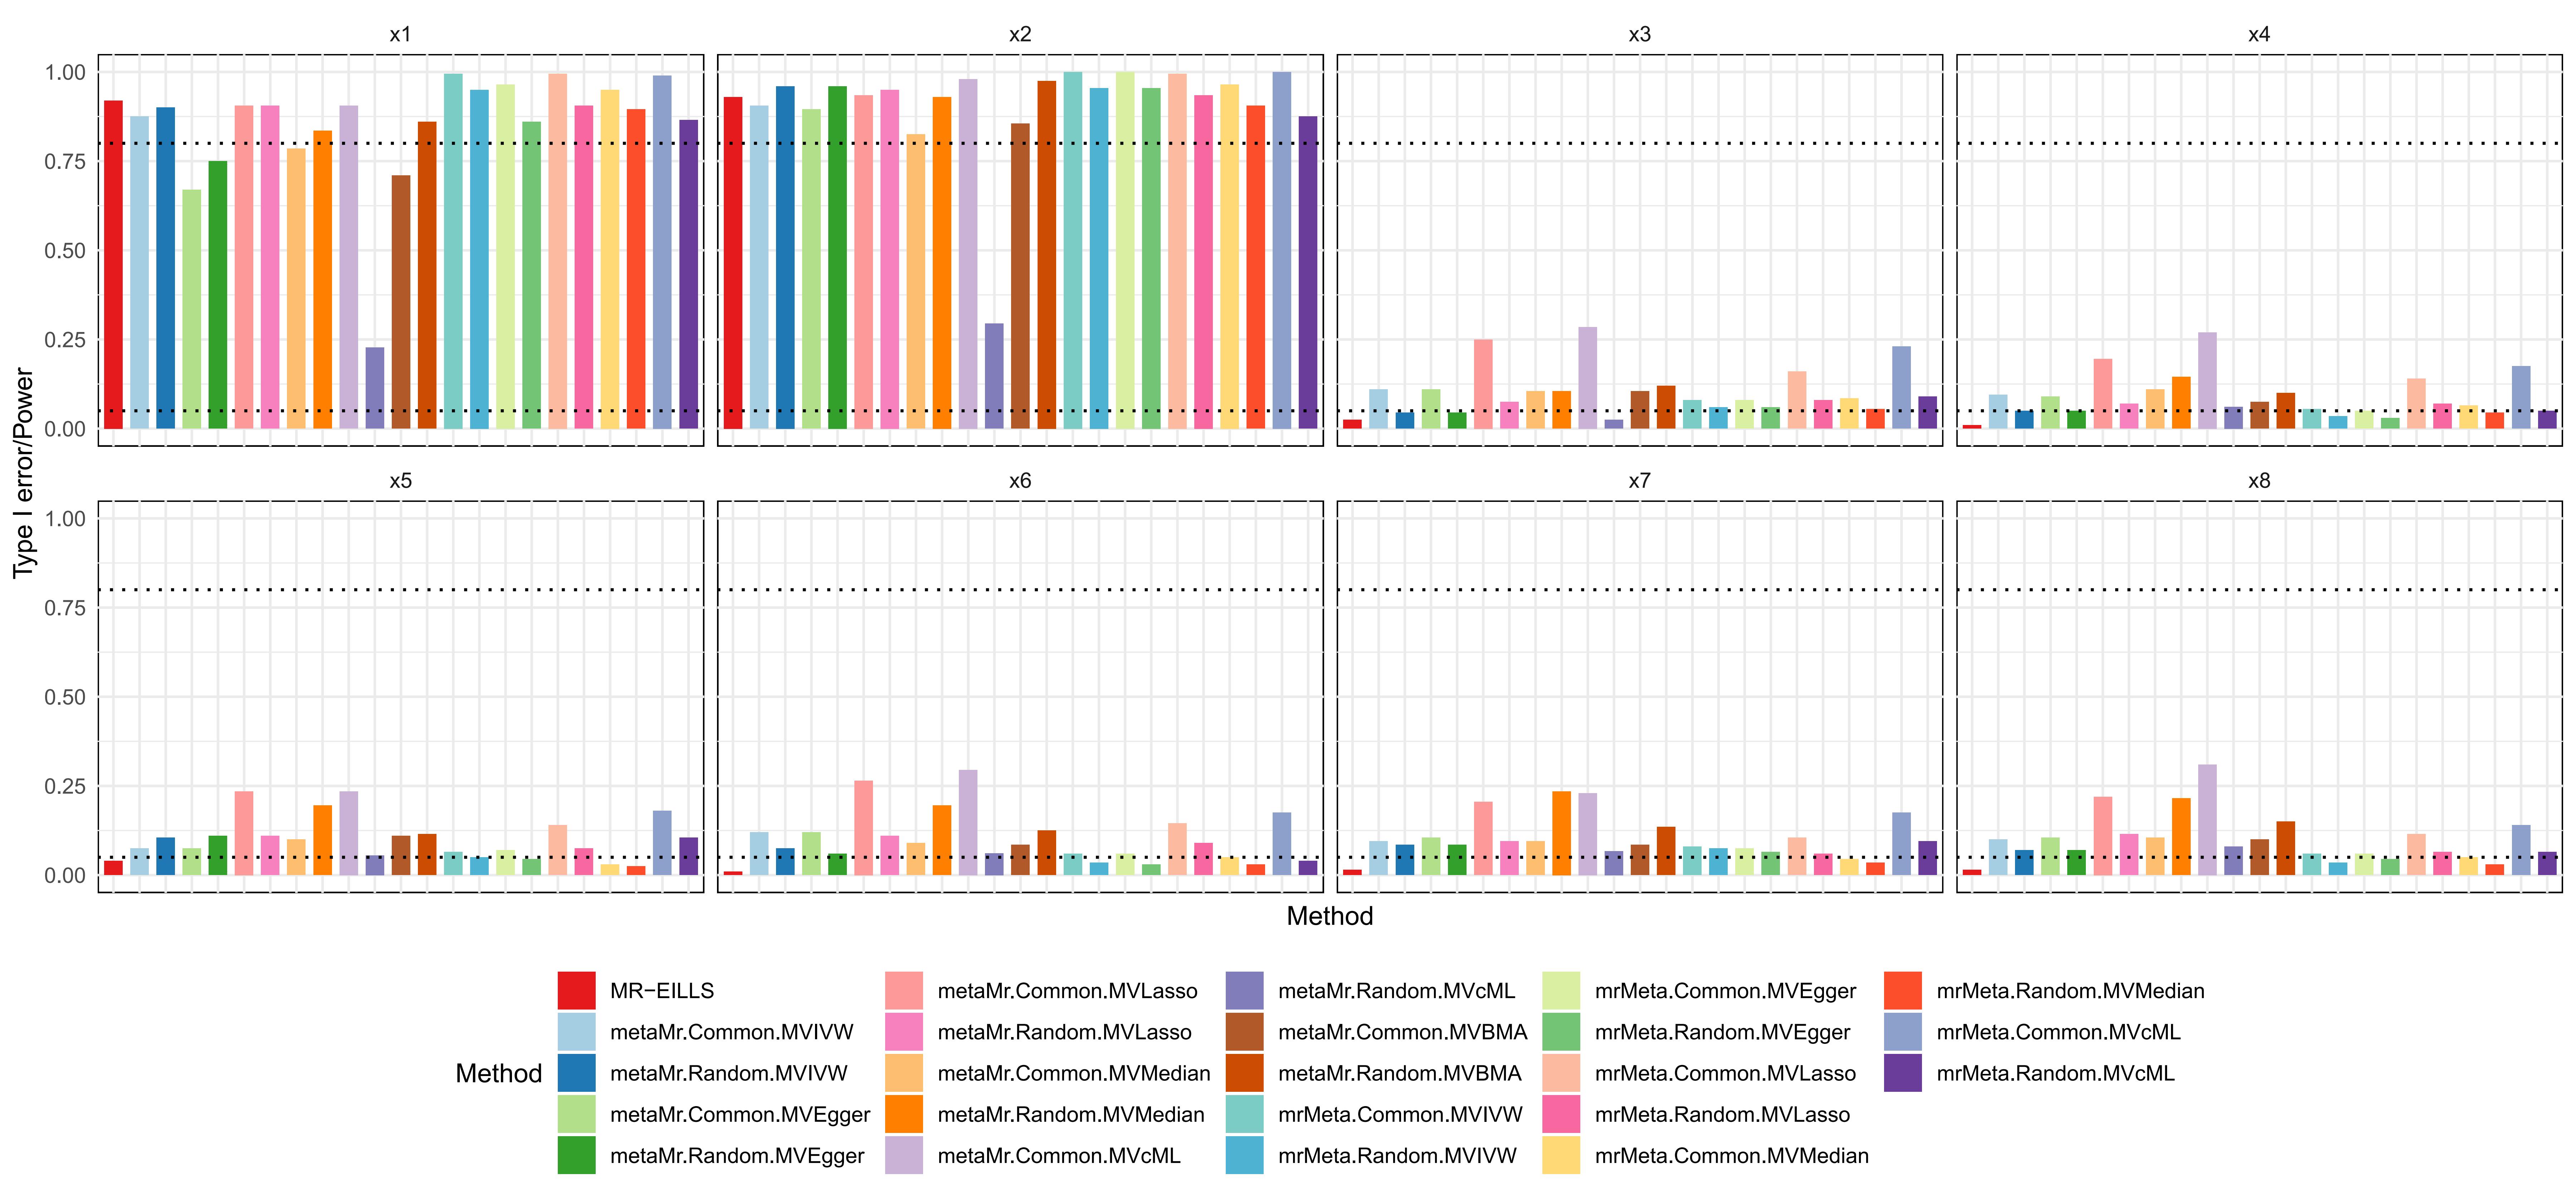


### Figure S39. Type I error/Power of causal effects’ estimation when g=100, E=3, P=8


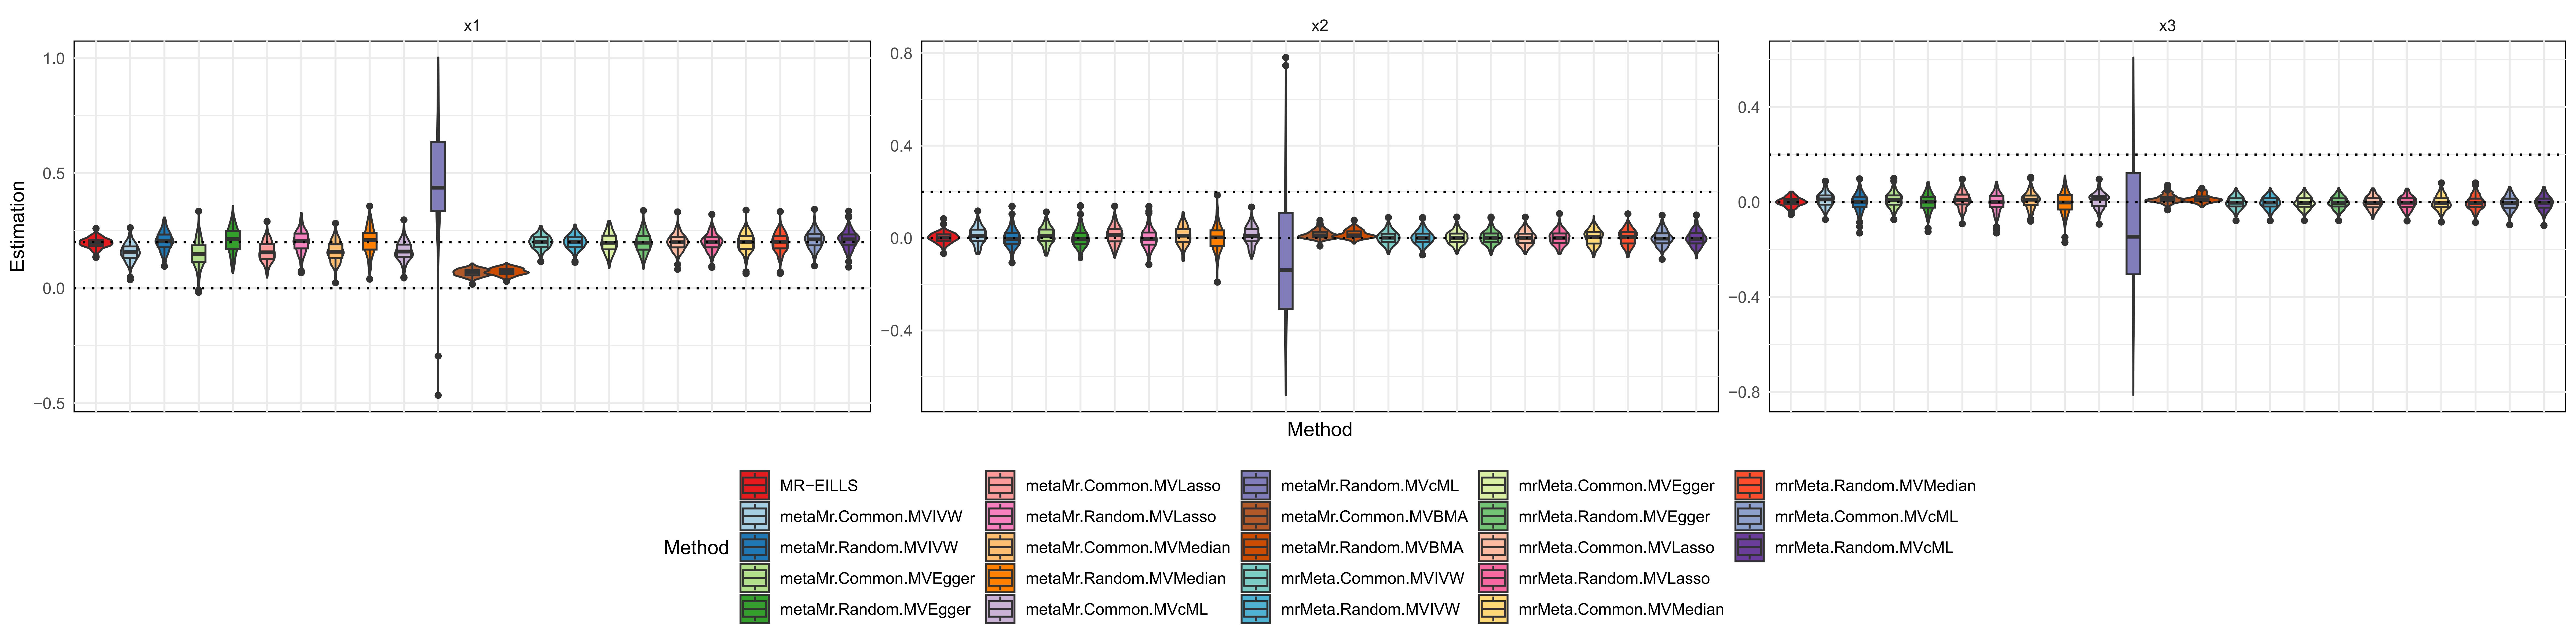


### Figure S40. Causal effects’ estimation when g=100, E=3, P=3


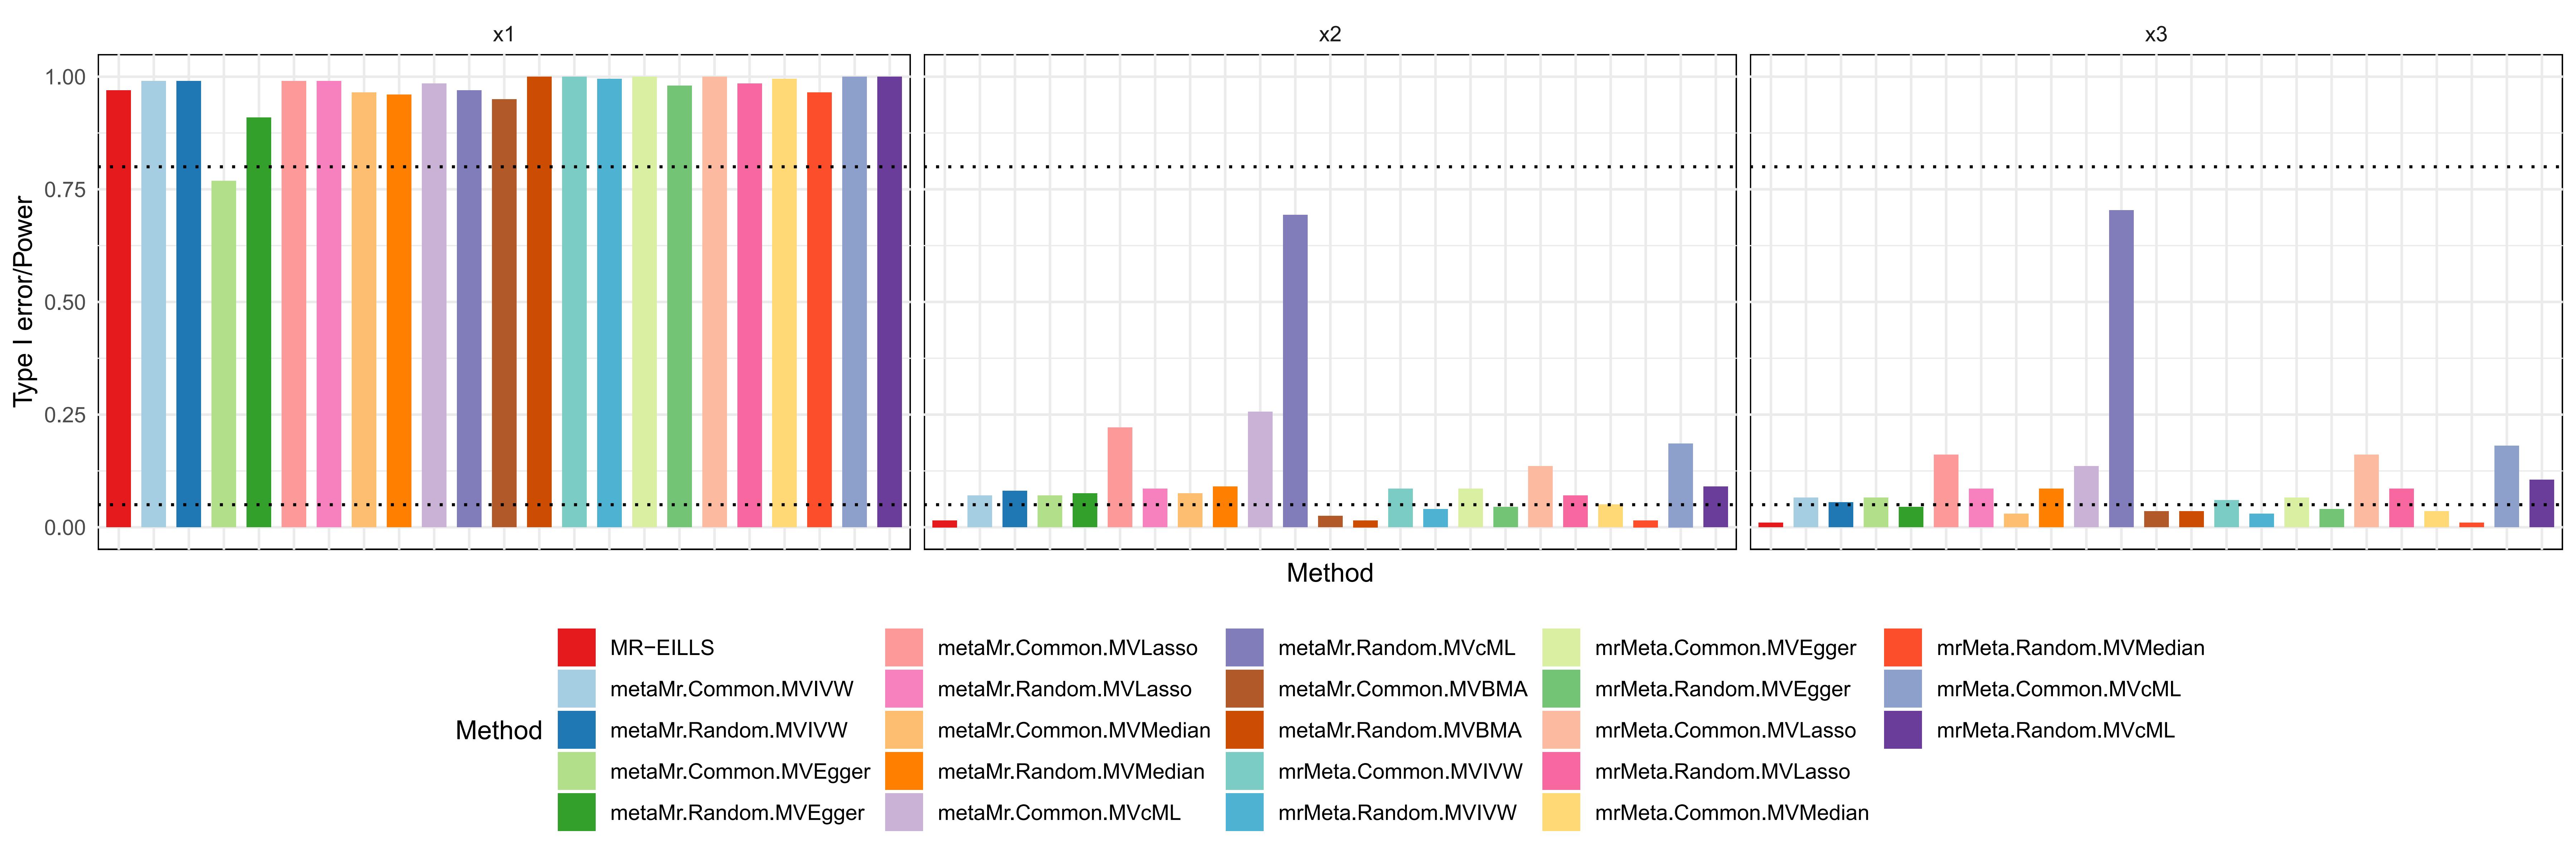


### Figure S41. Type I error/Power of causal effects’ estimation when g=100, E=3, P=3

## 7.2 Measurement of heterogeneity between datasets


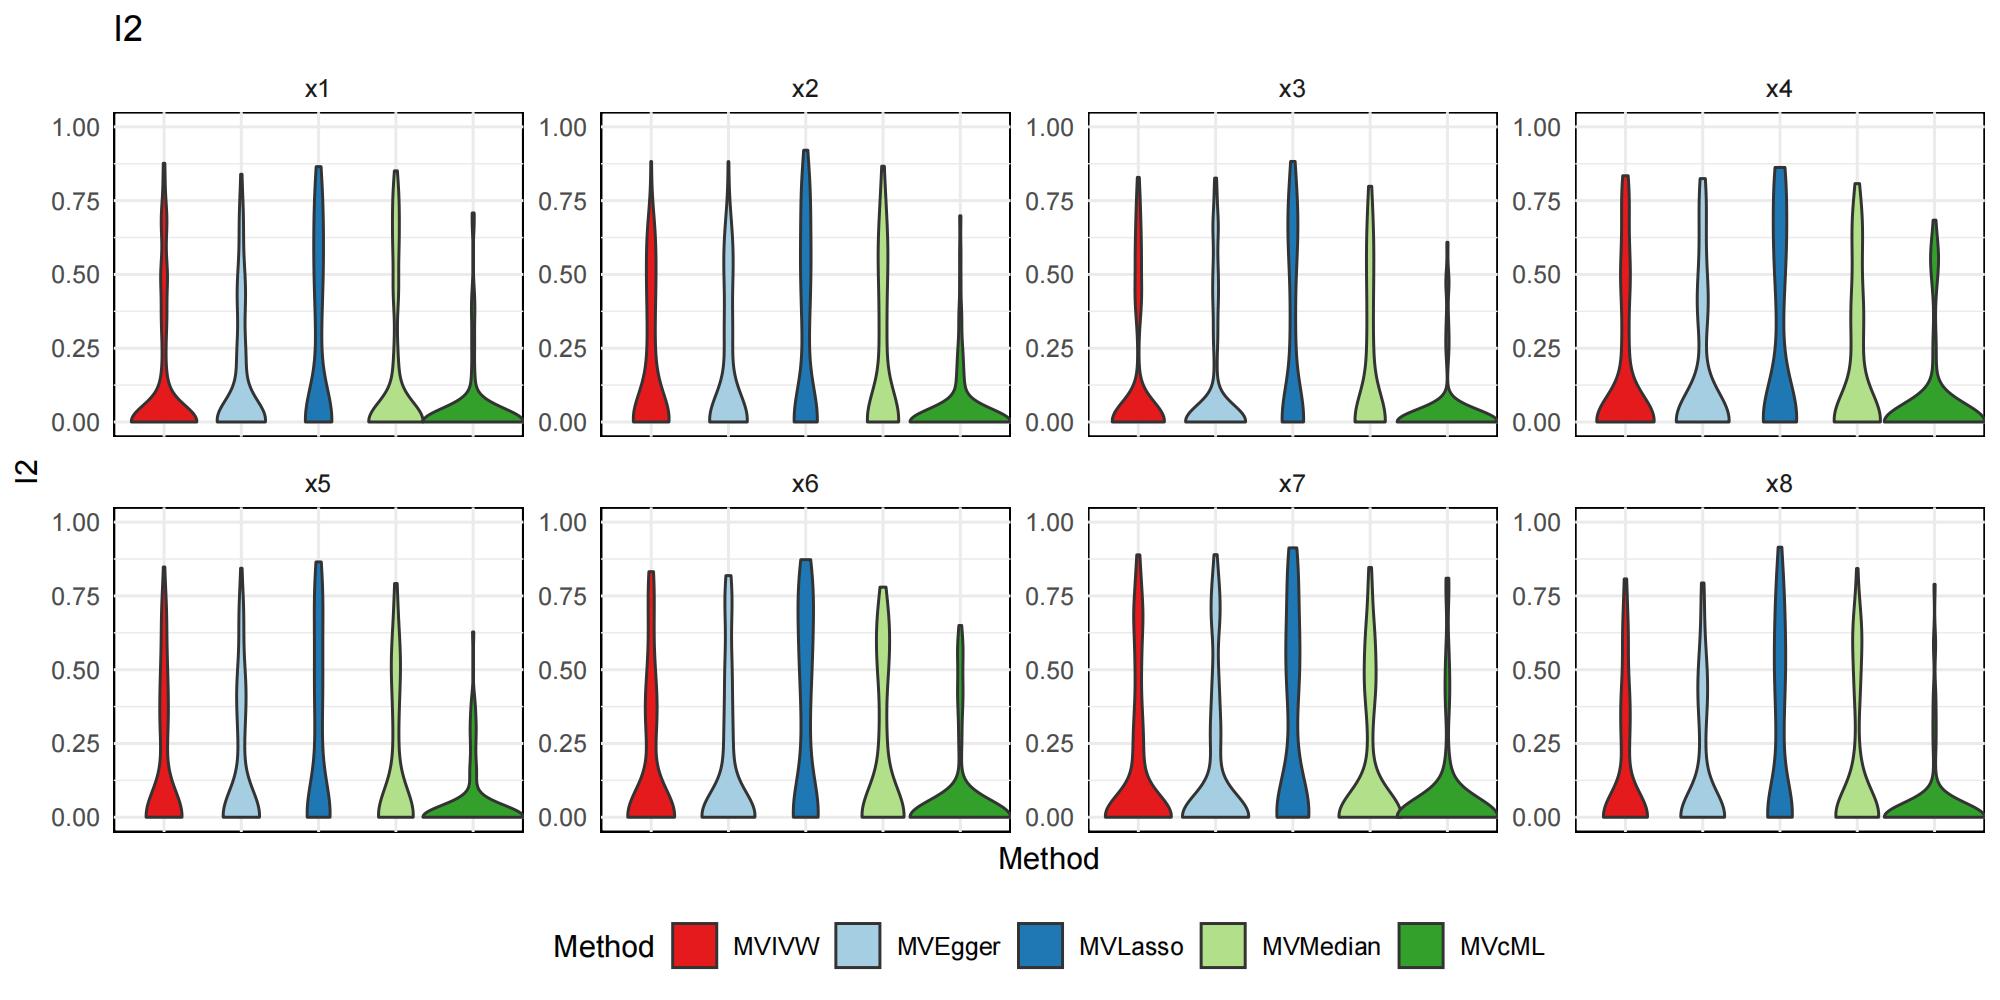


### Figure S42. of causal effect estimations in datasets

We randomly select one simulation and demonstrate its causal effects’ estimation for each MR methods and each dataset in Figure S43. The summary of for each simulation are shown in Table S3.


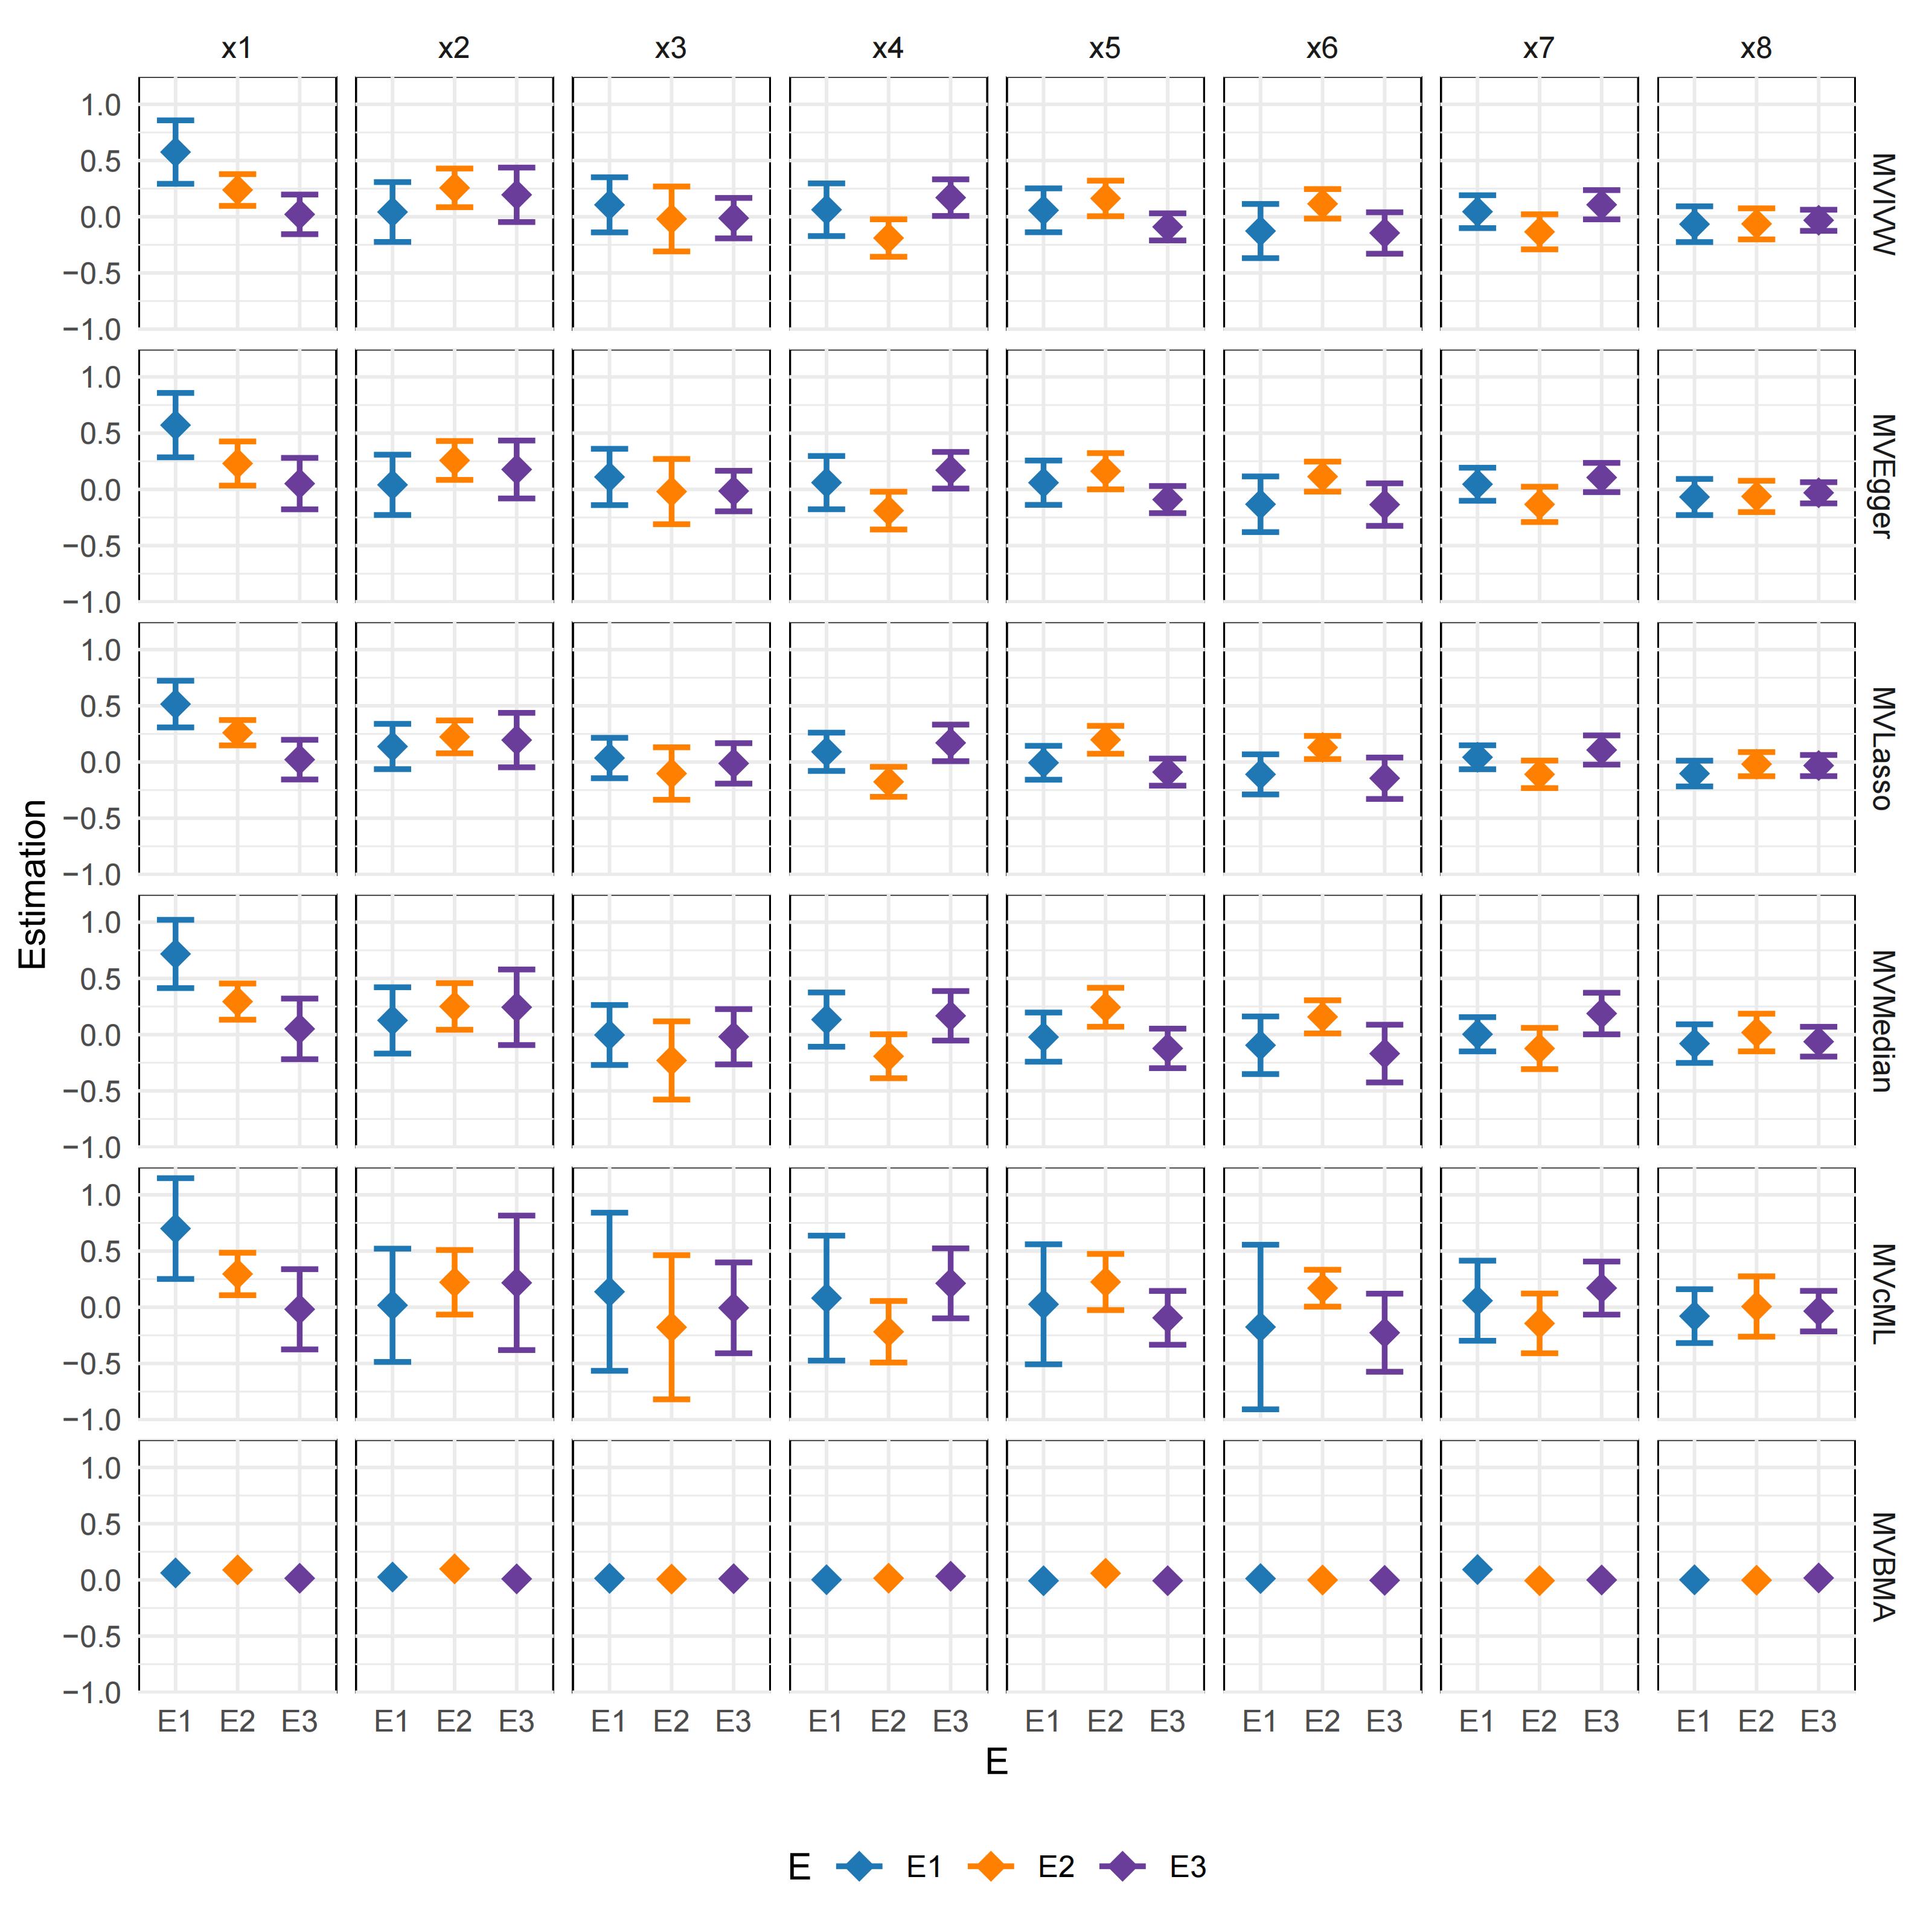


### Figure S43. Causal effects’ estimations in Simulation ID=59

# 8 Application


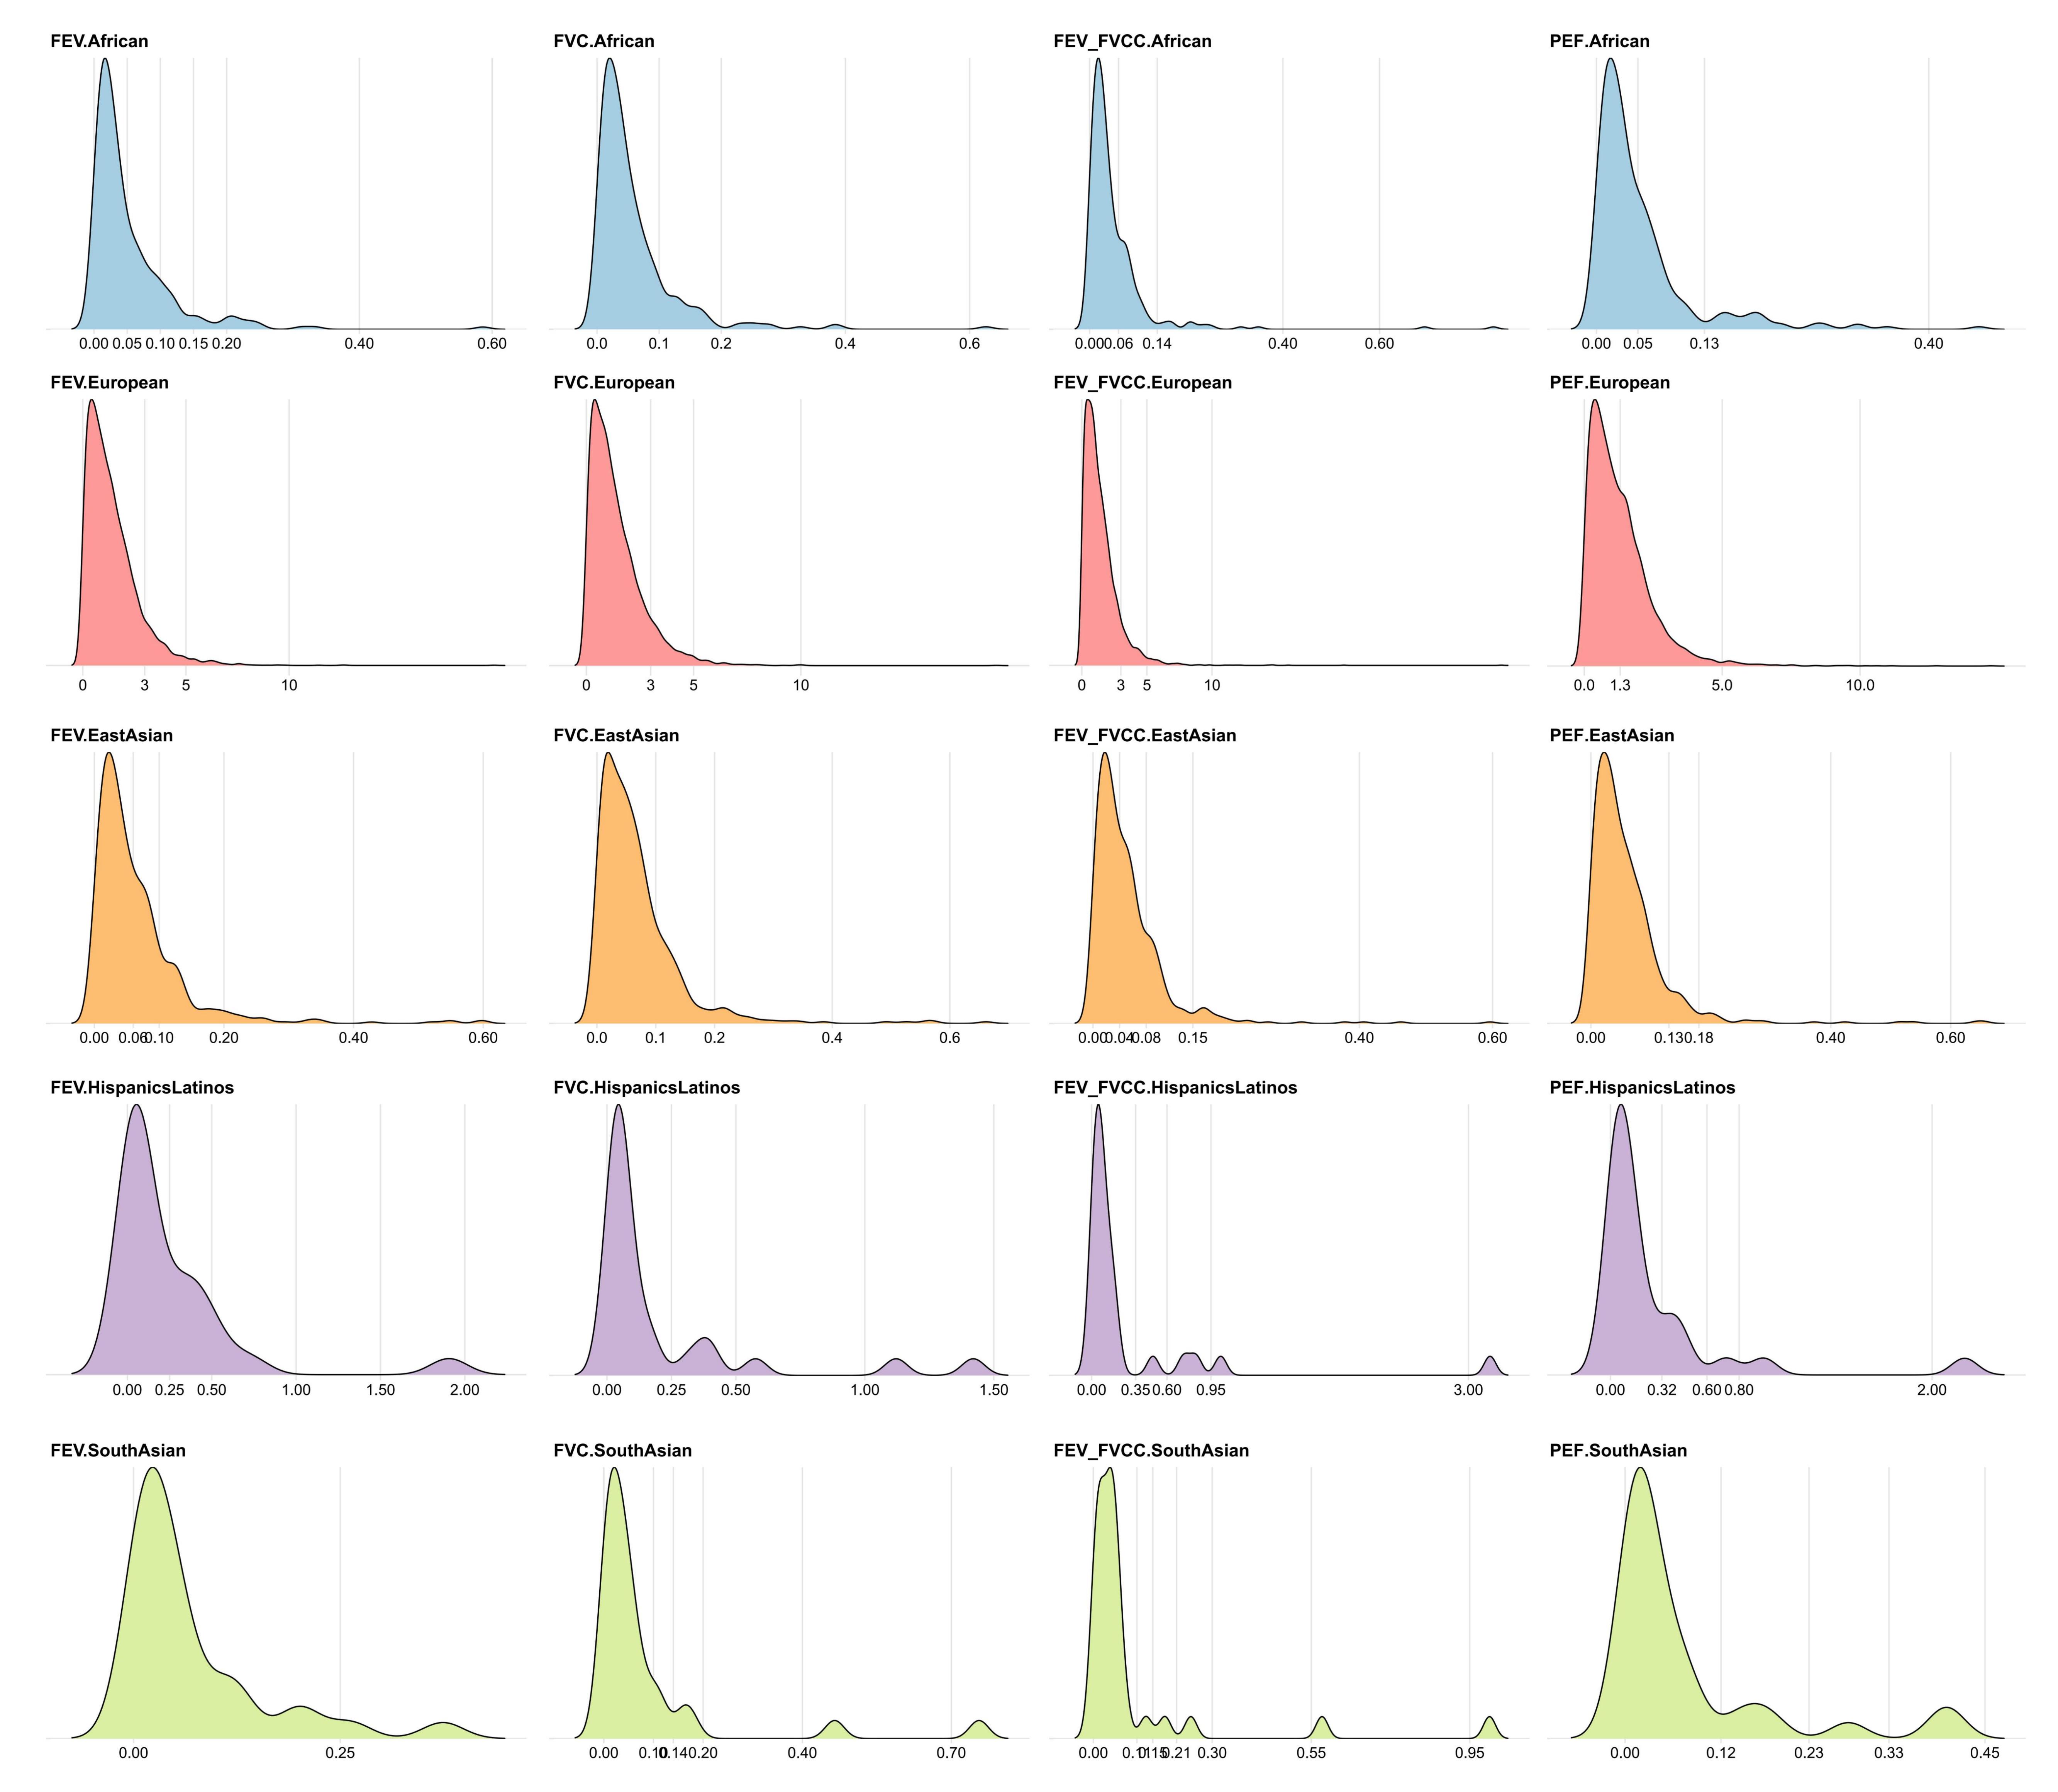


### Figure S44. Ridge plot in application

# 9 Hyper parameters


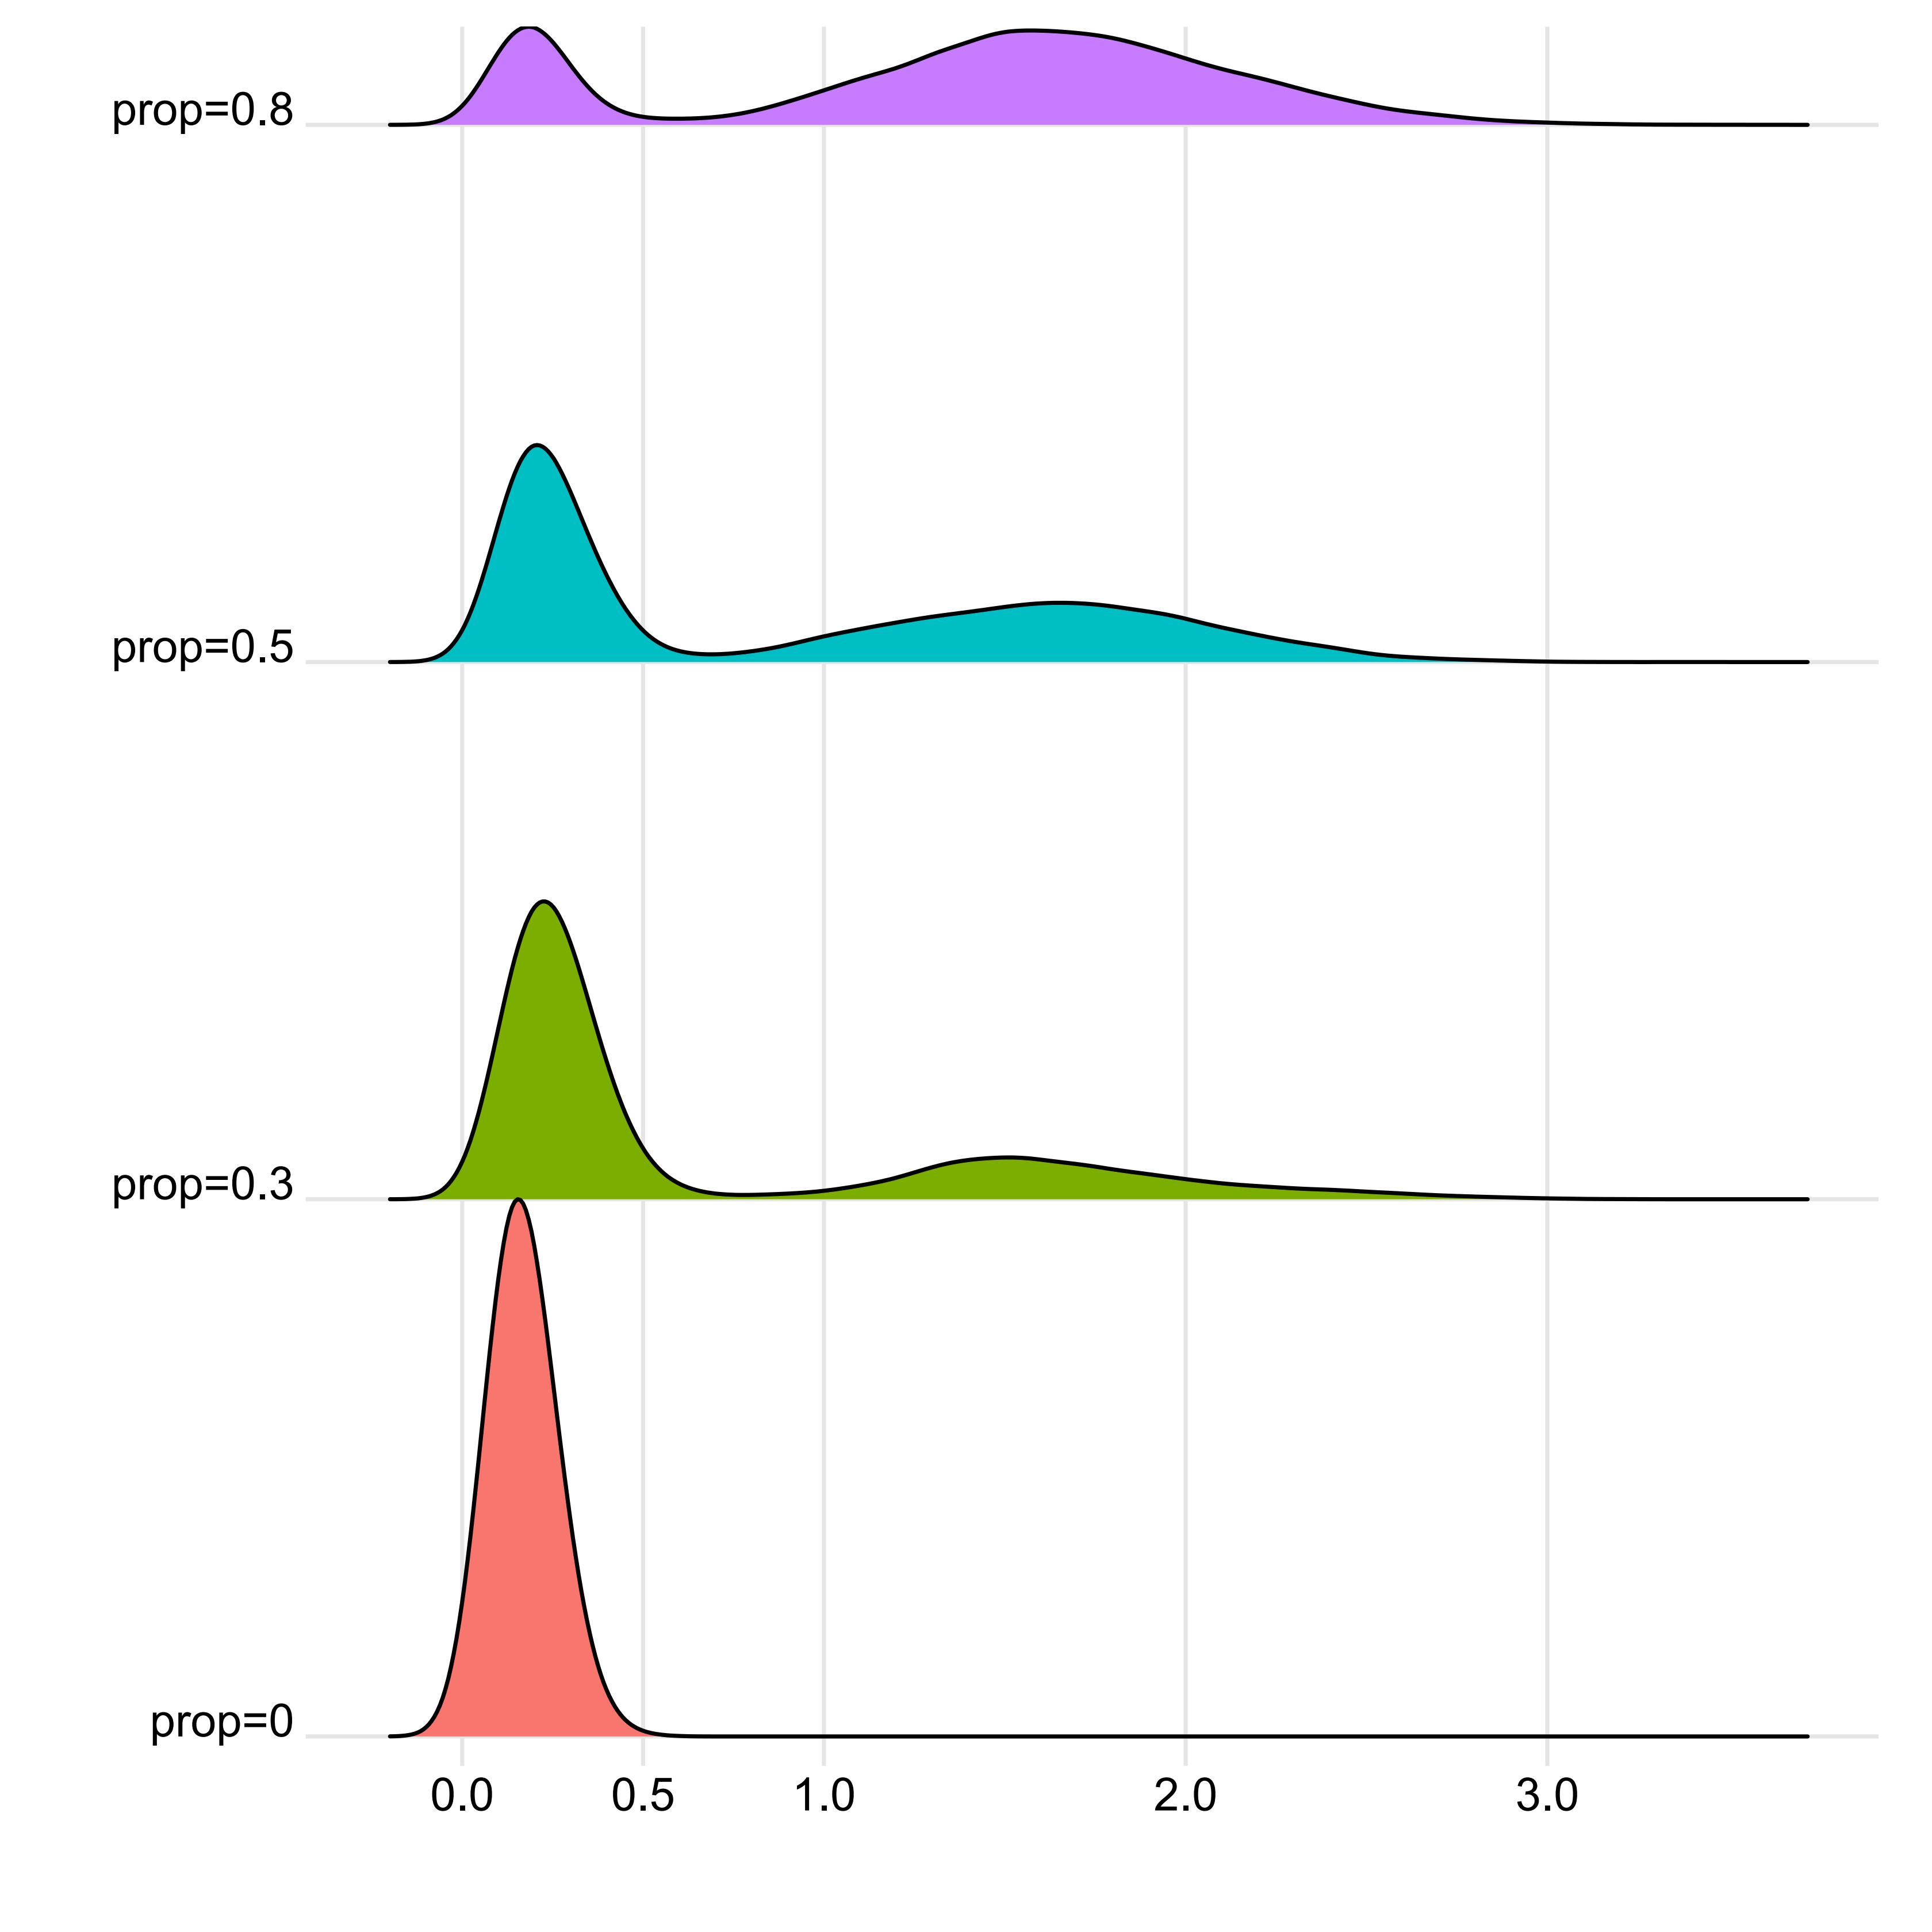


### Figure S45. Ridge plot when causal effect is zero in UVMR


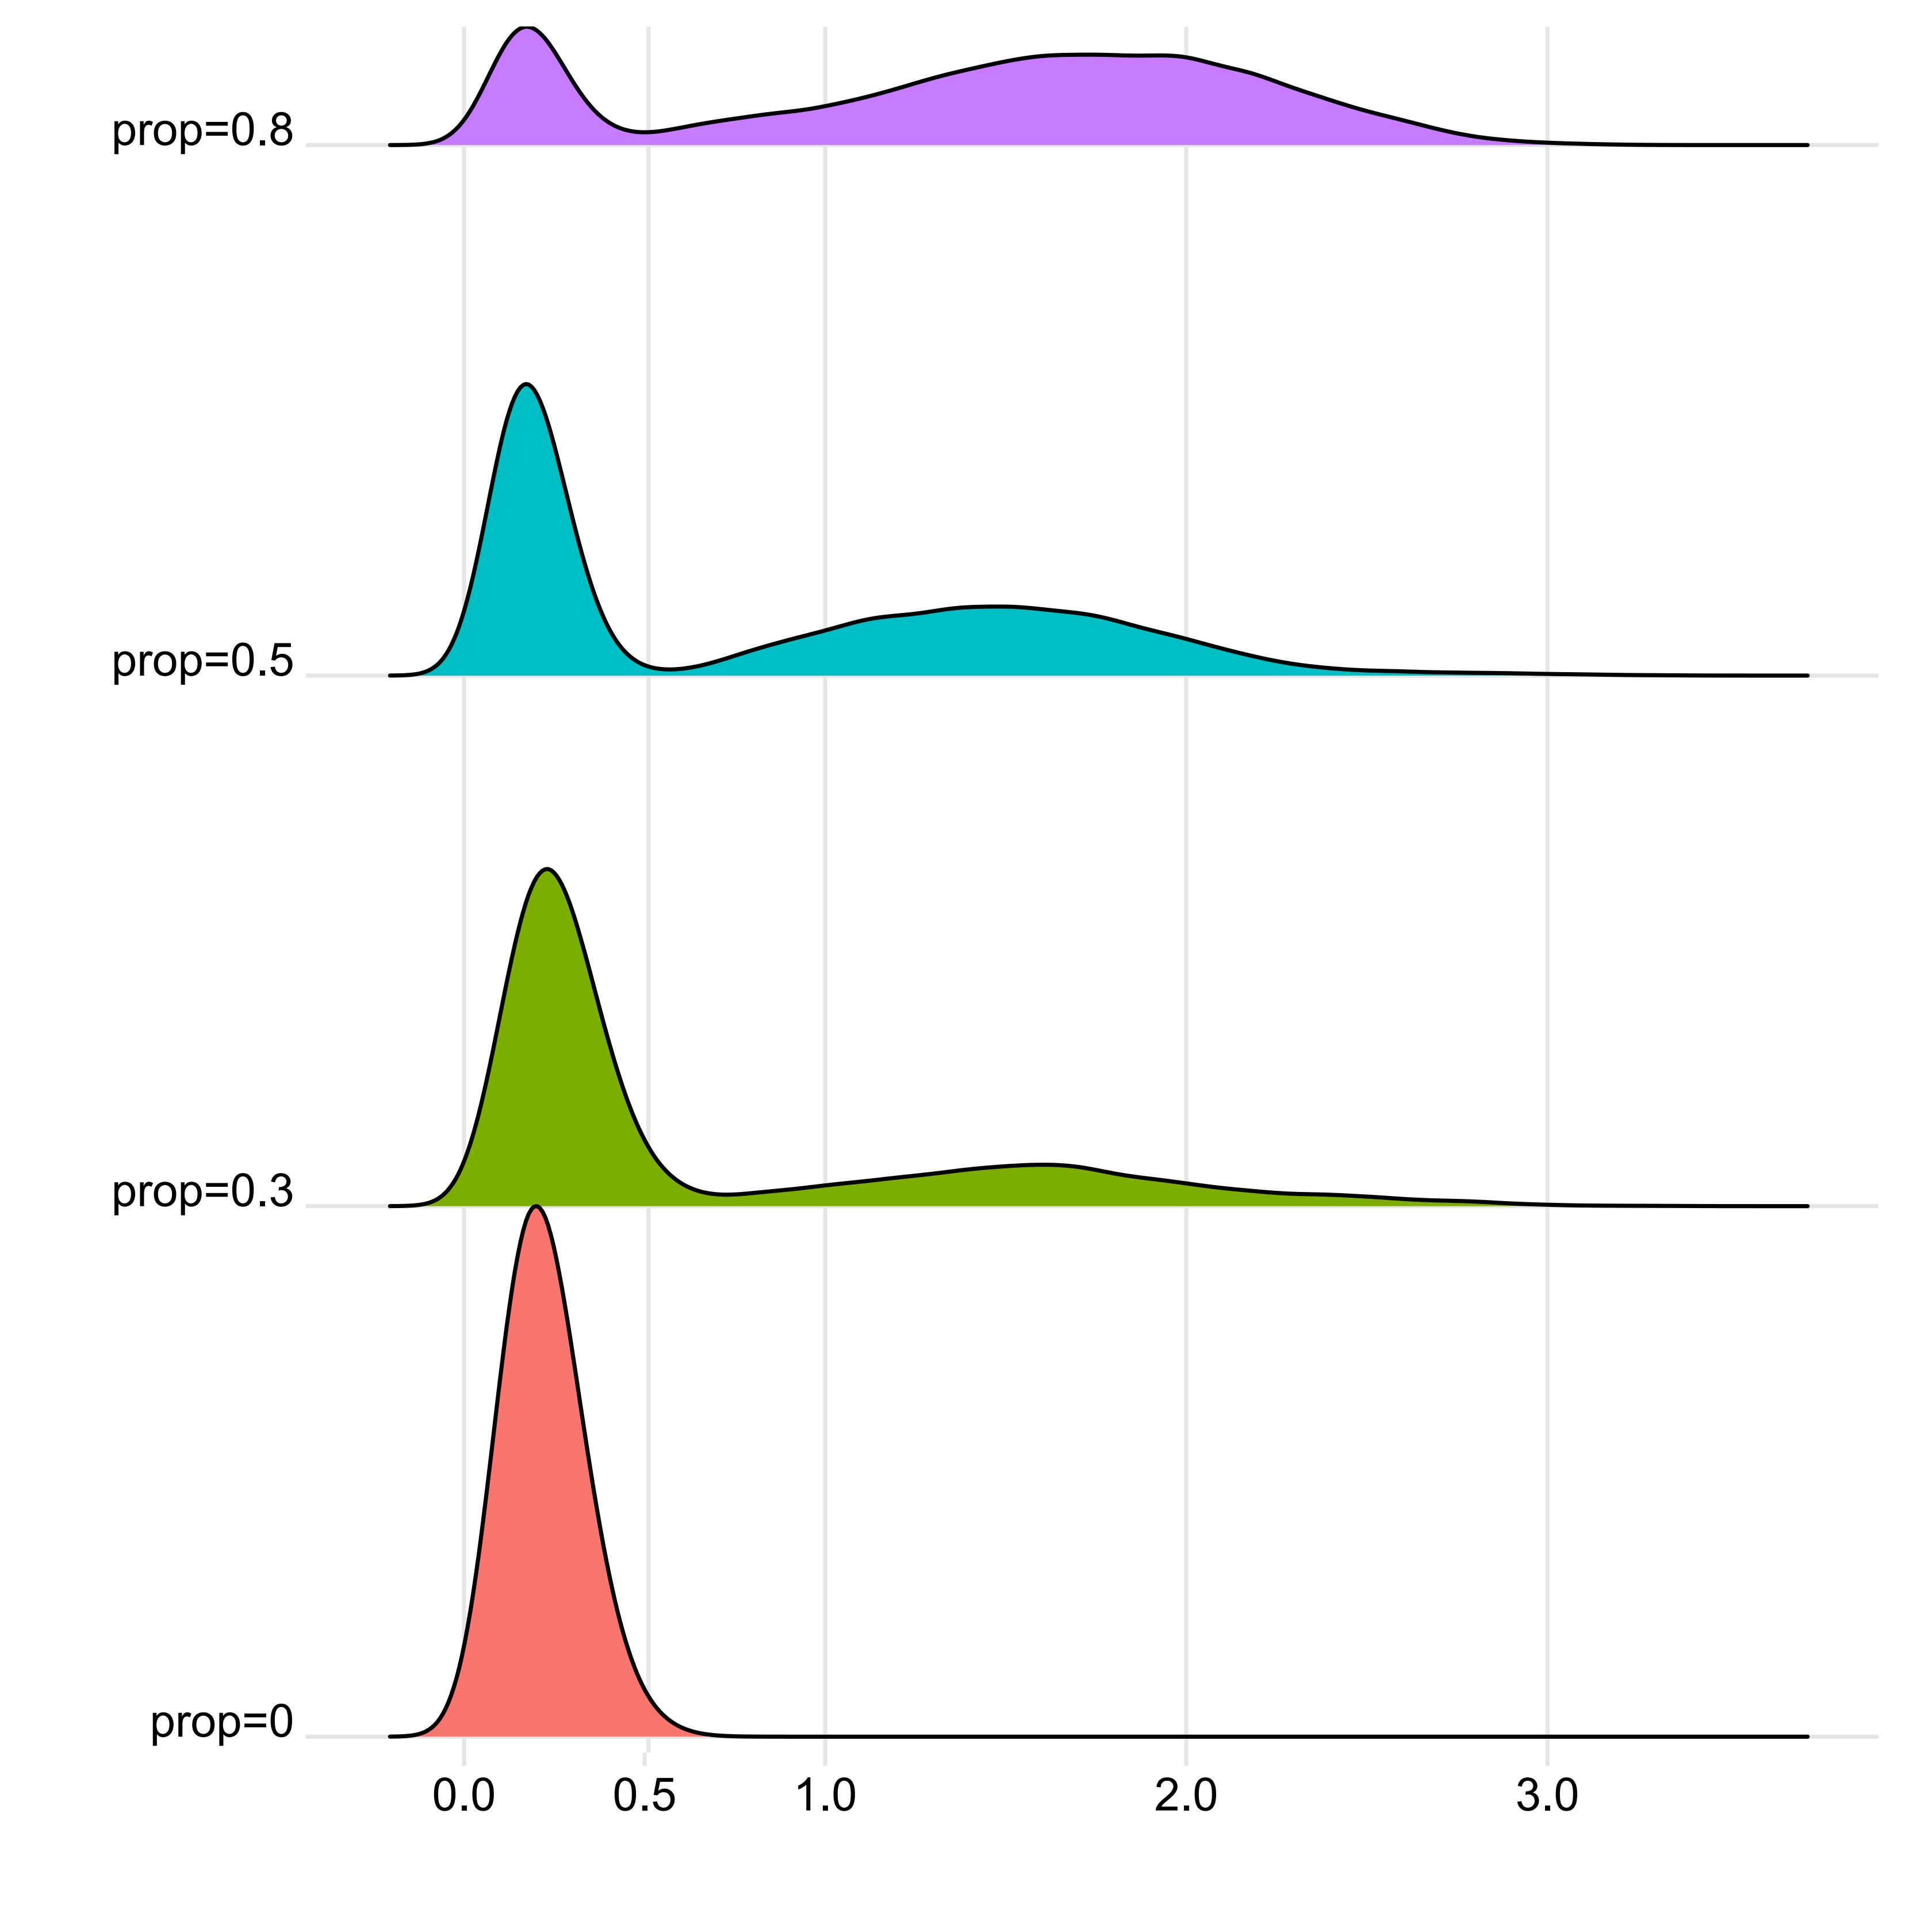


### Figure S46. Ridge plot when causal effect is 0.1 in UVMR


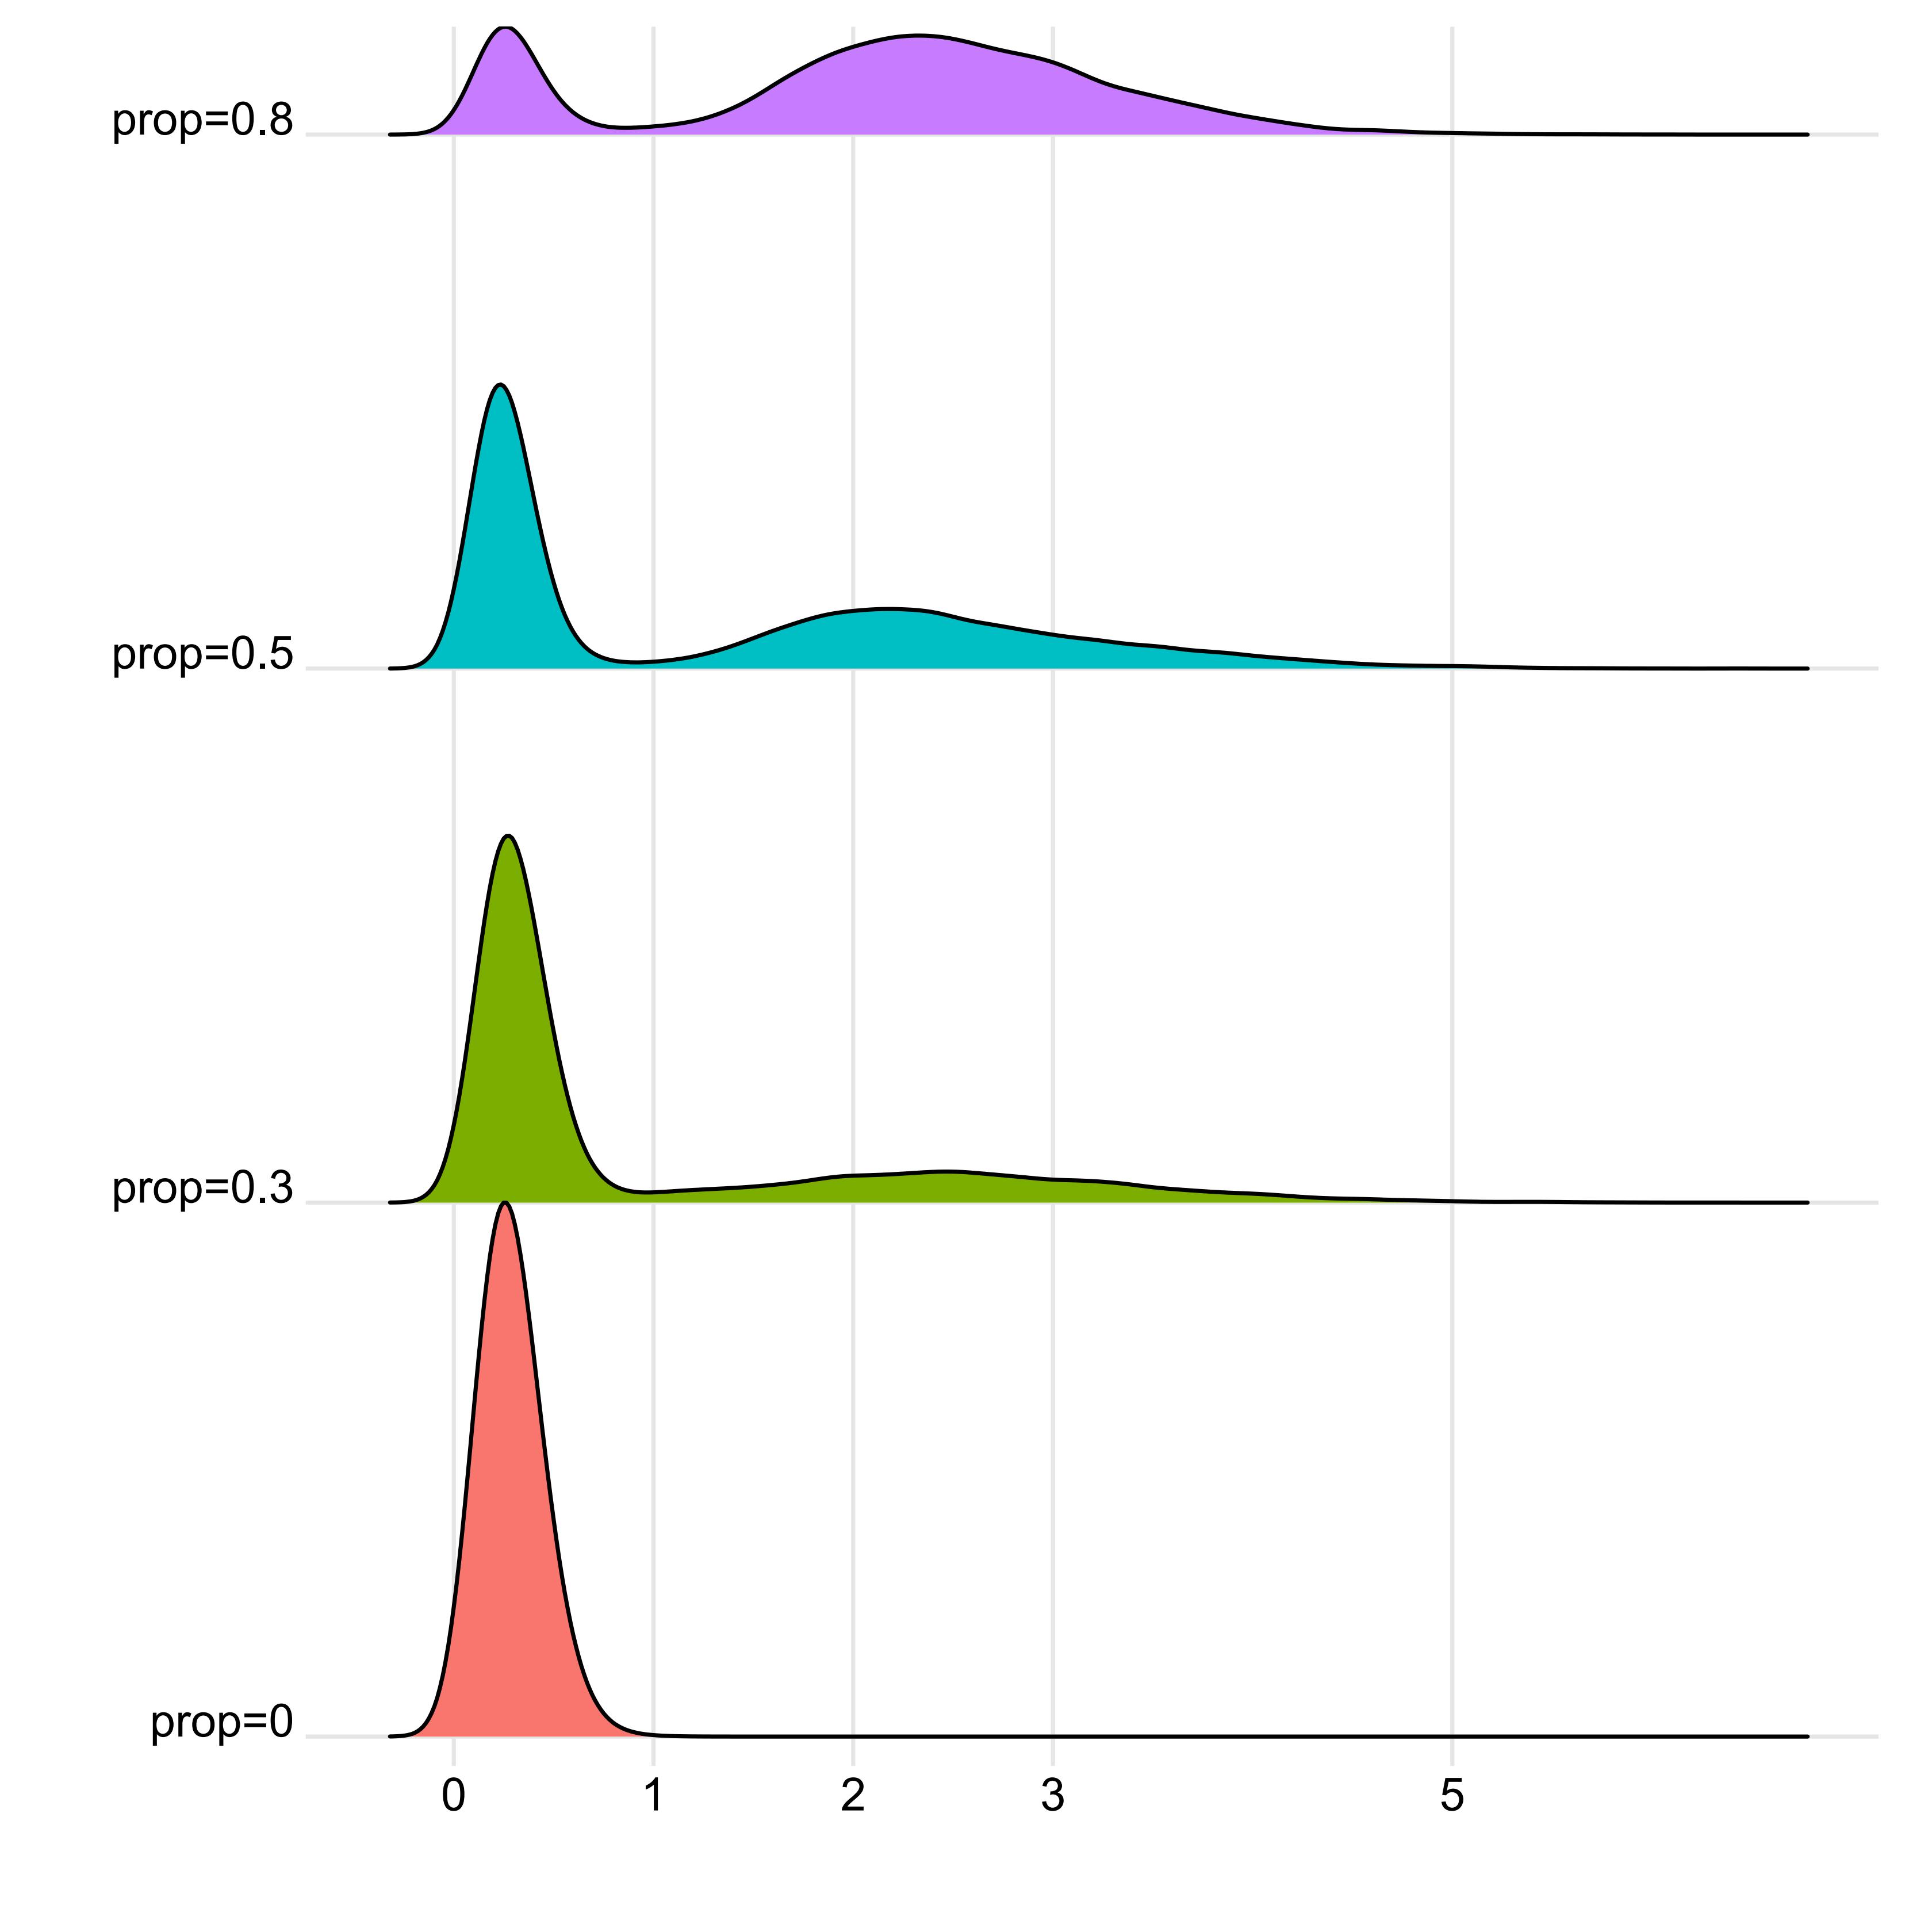


### Figure S47. Ridge plot when P=3 in MVMR


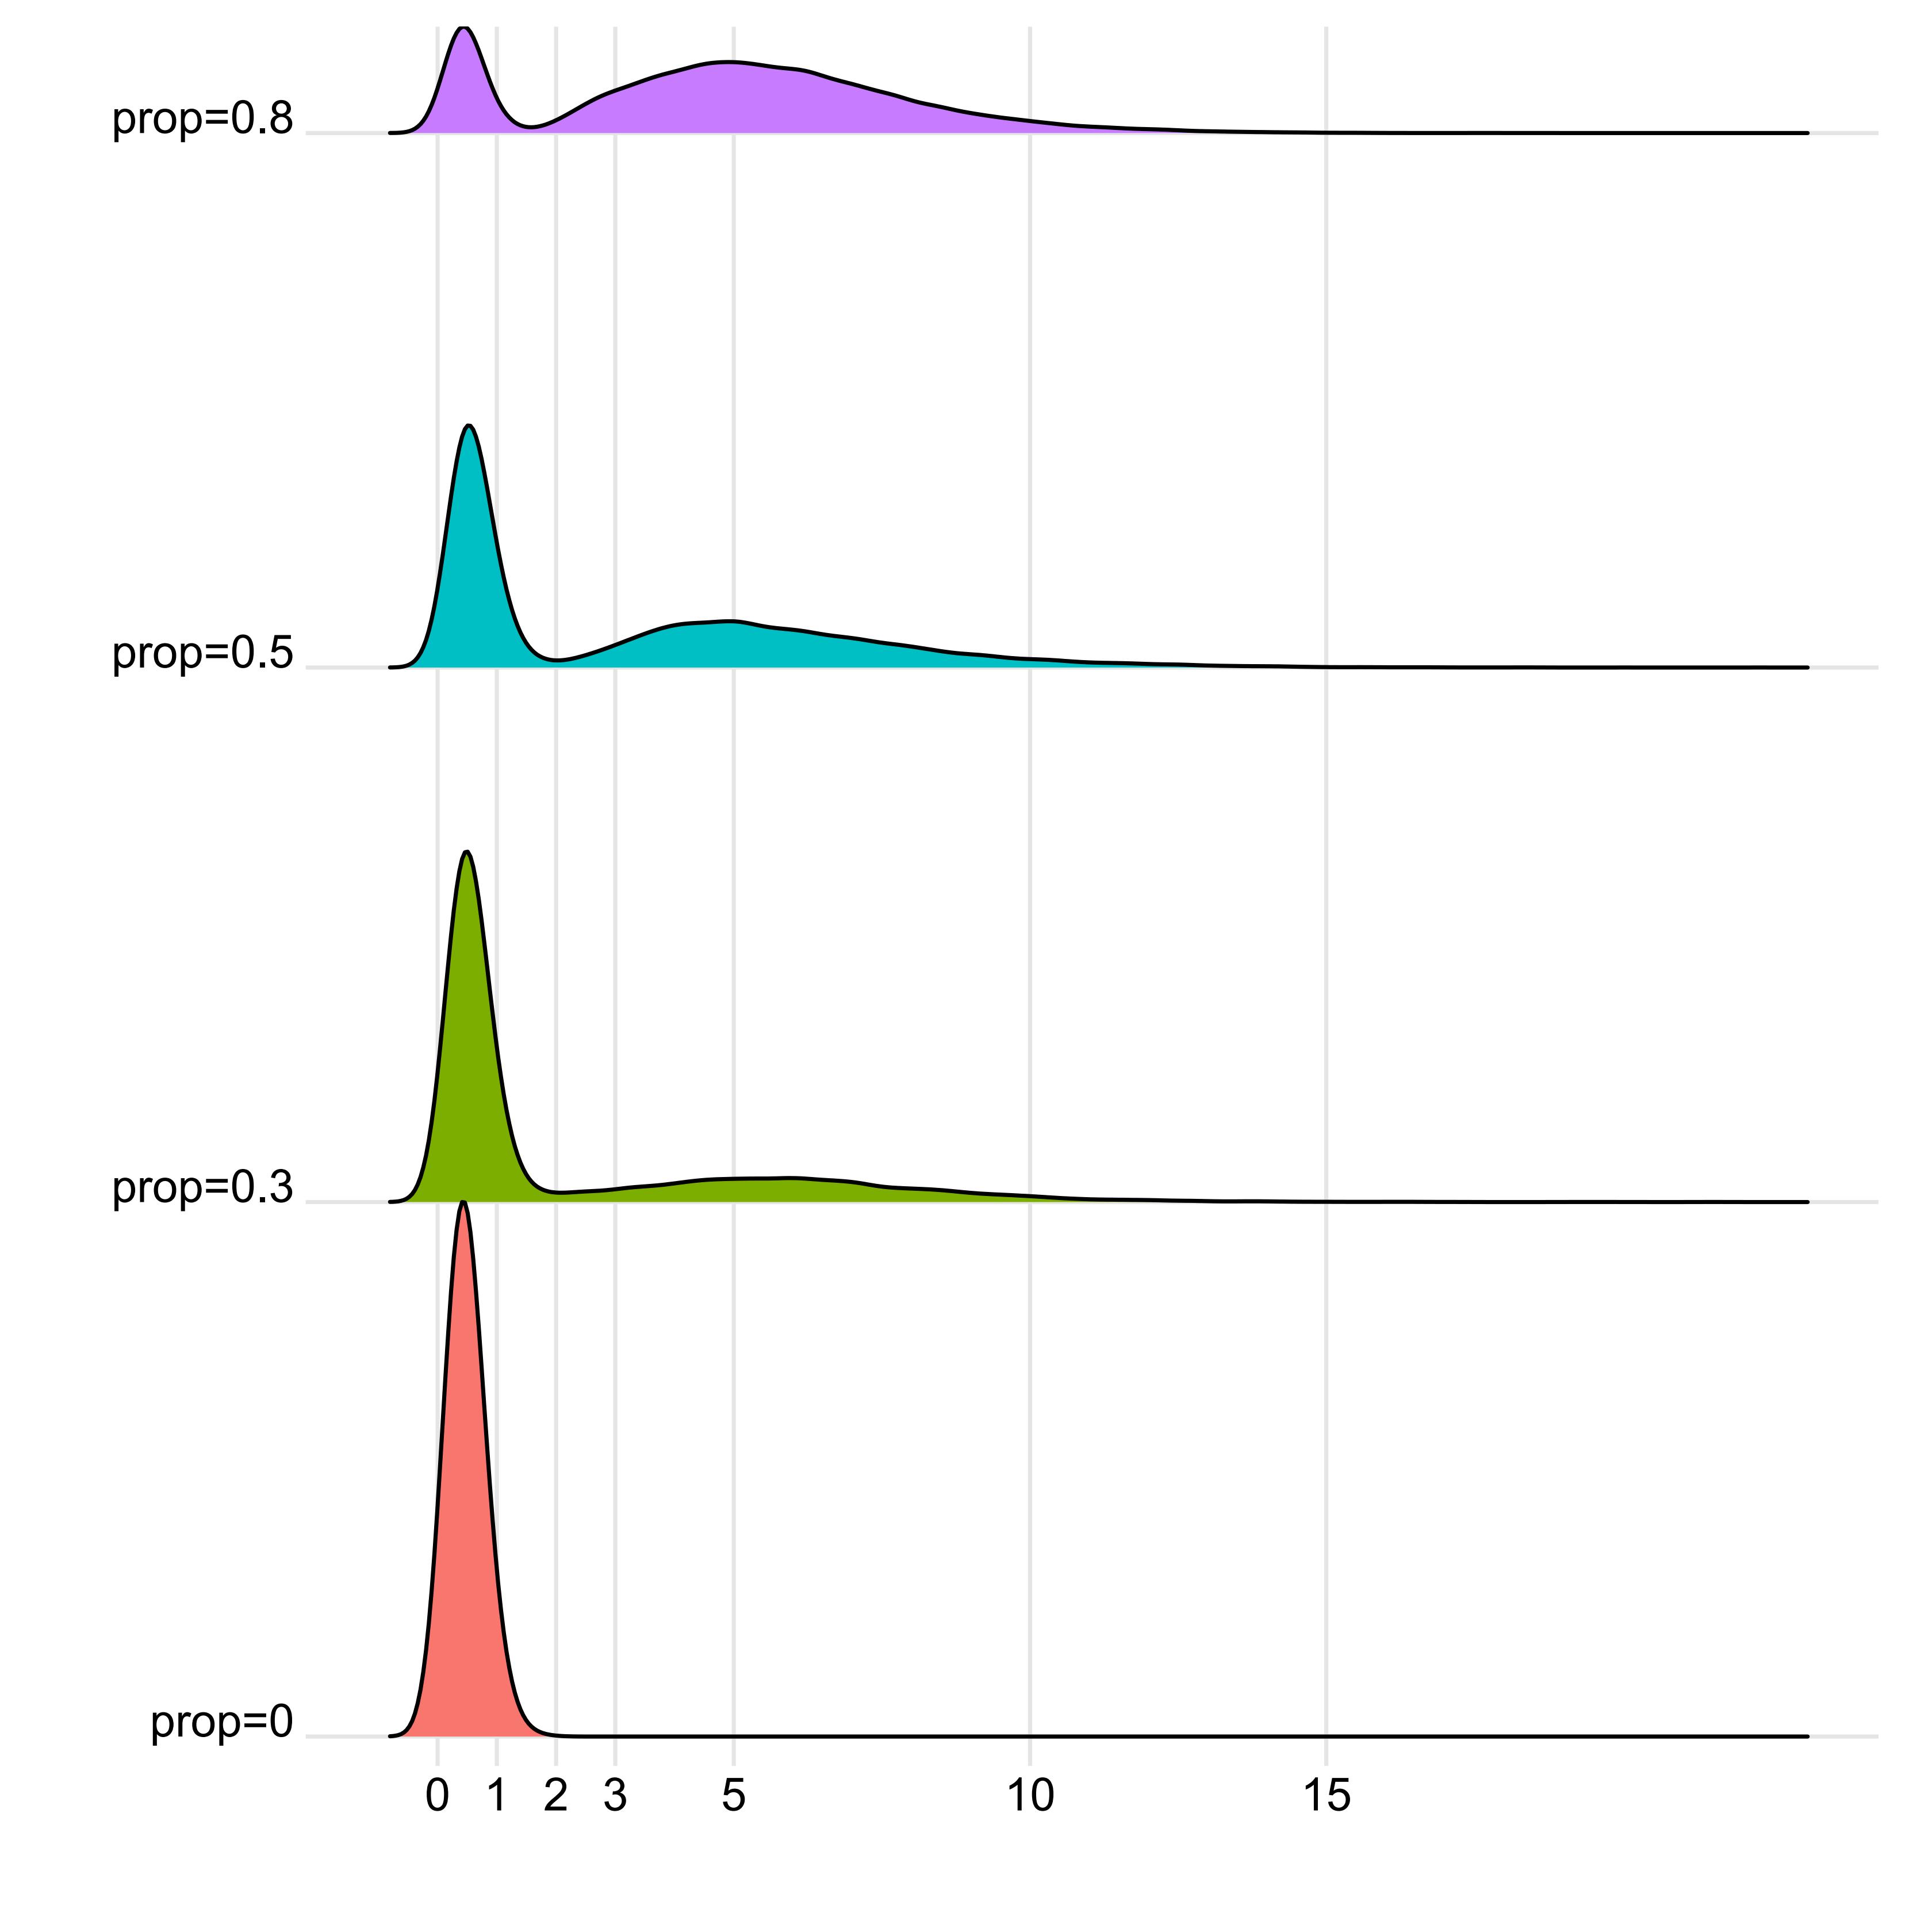


### Figure S48. Ridge plot when P=8 in MVMR


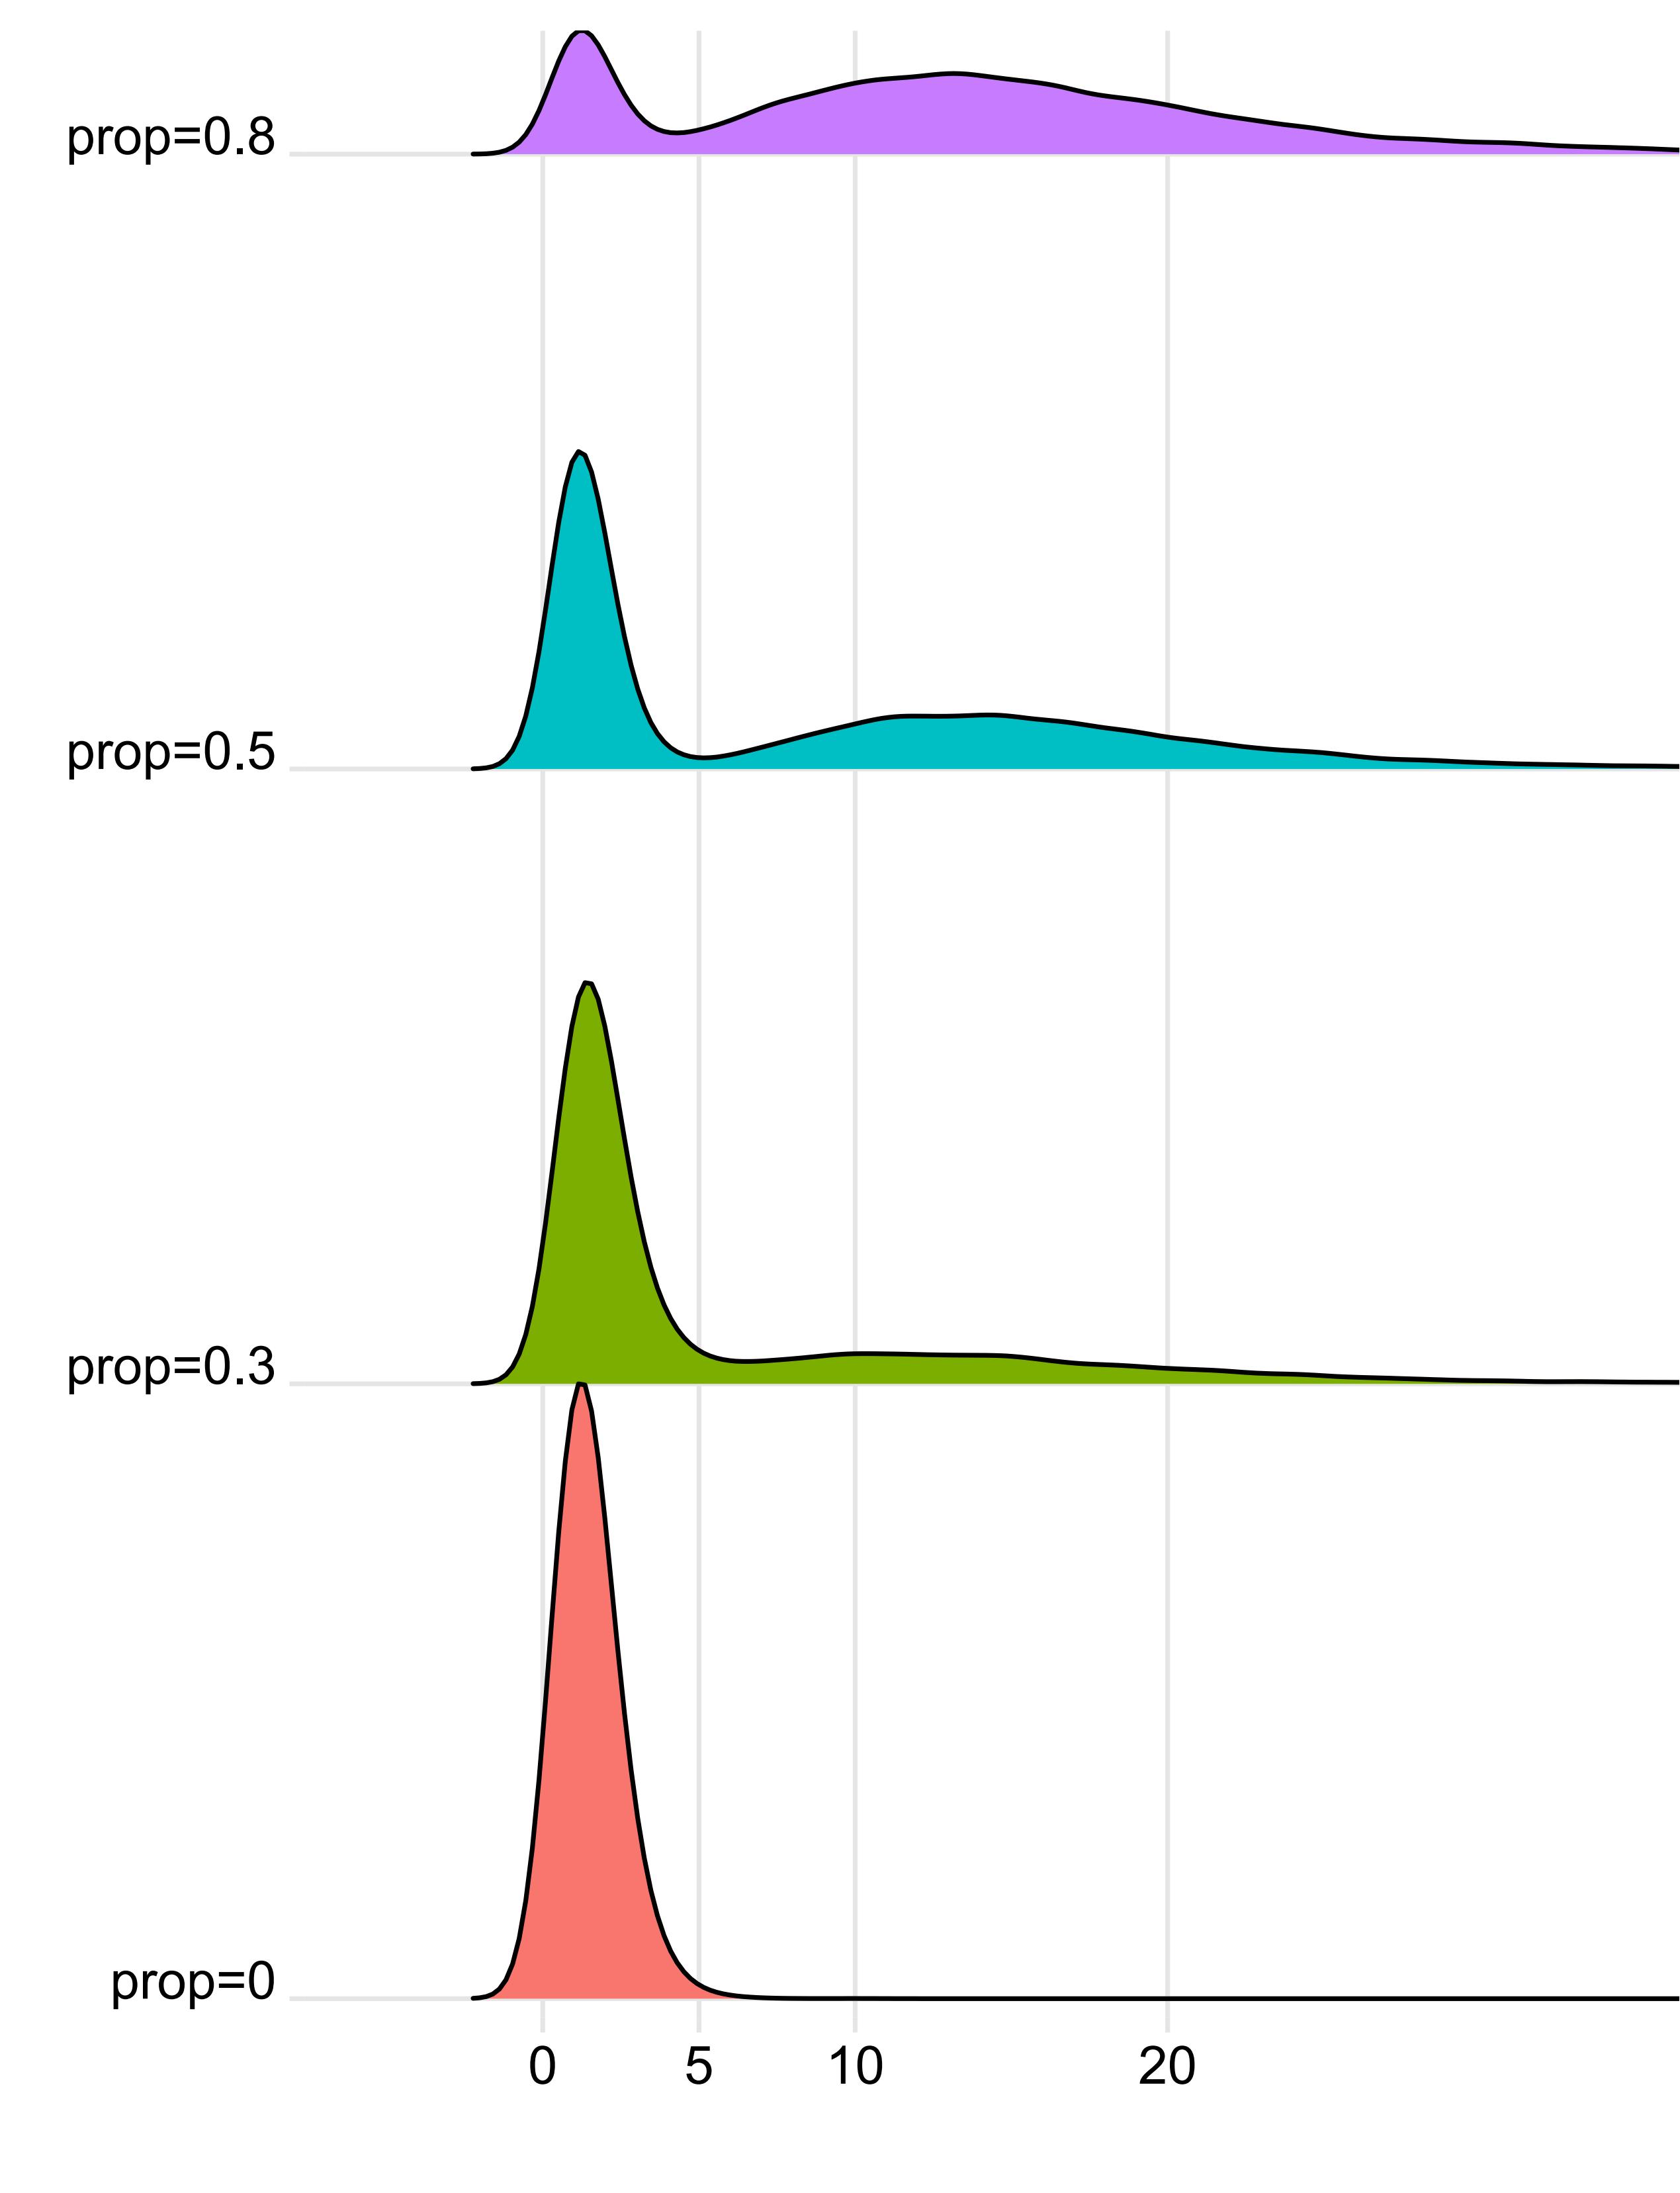


### Figure S49. Ridge plot when P=15 in MVMR

## 9.1 Scenario (a): Correlated and uncorrelated pleiotropy


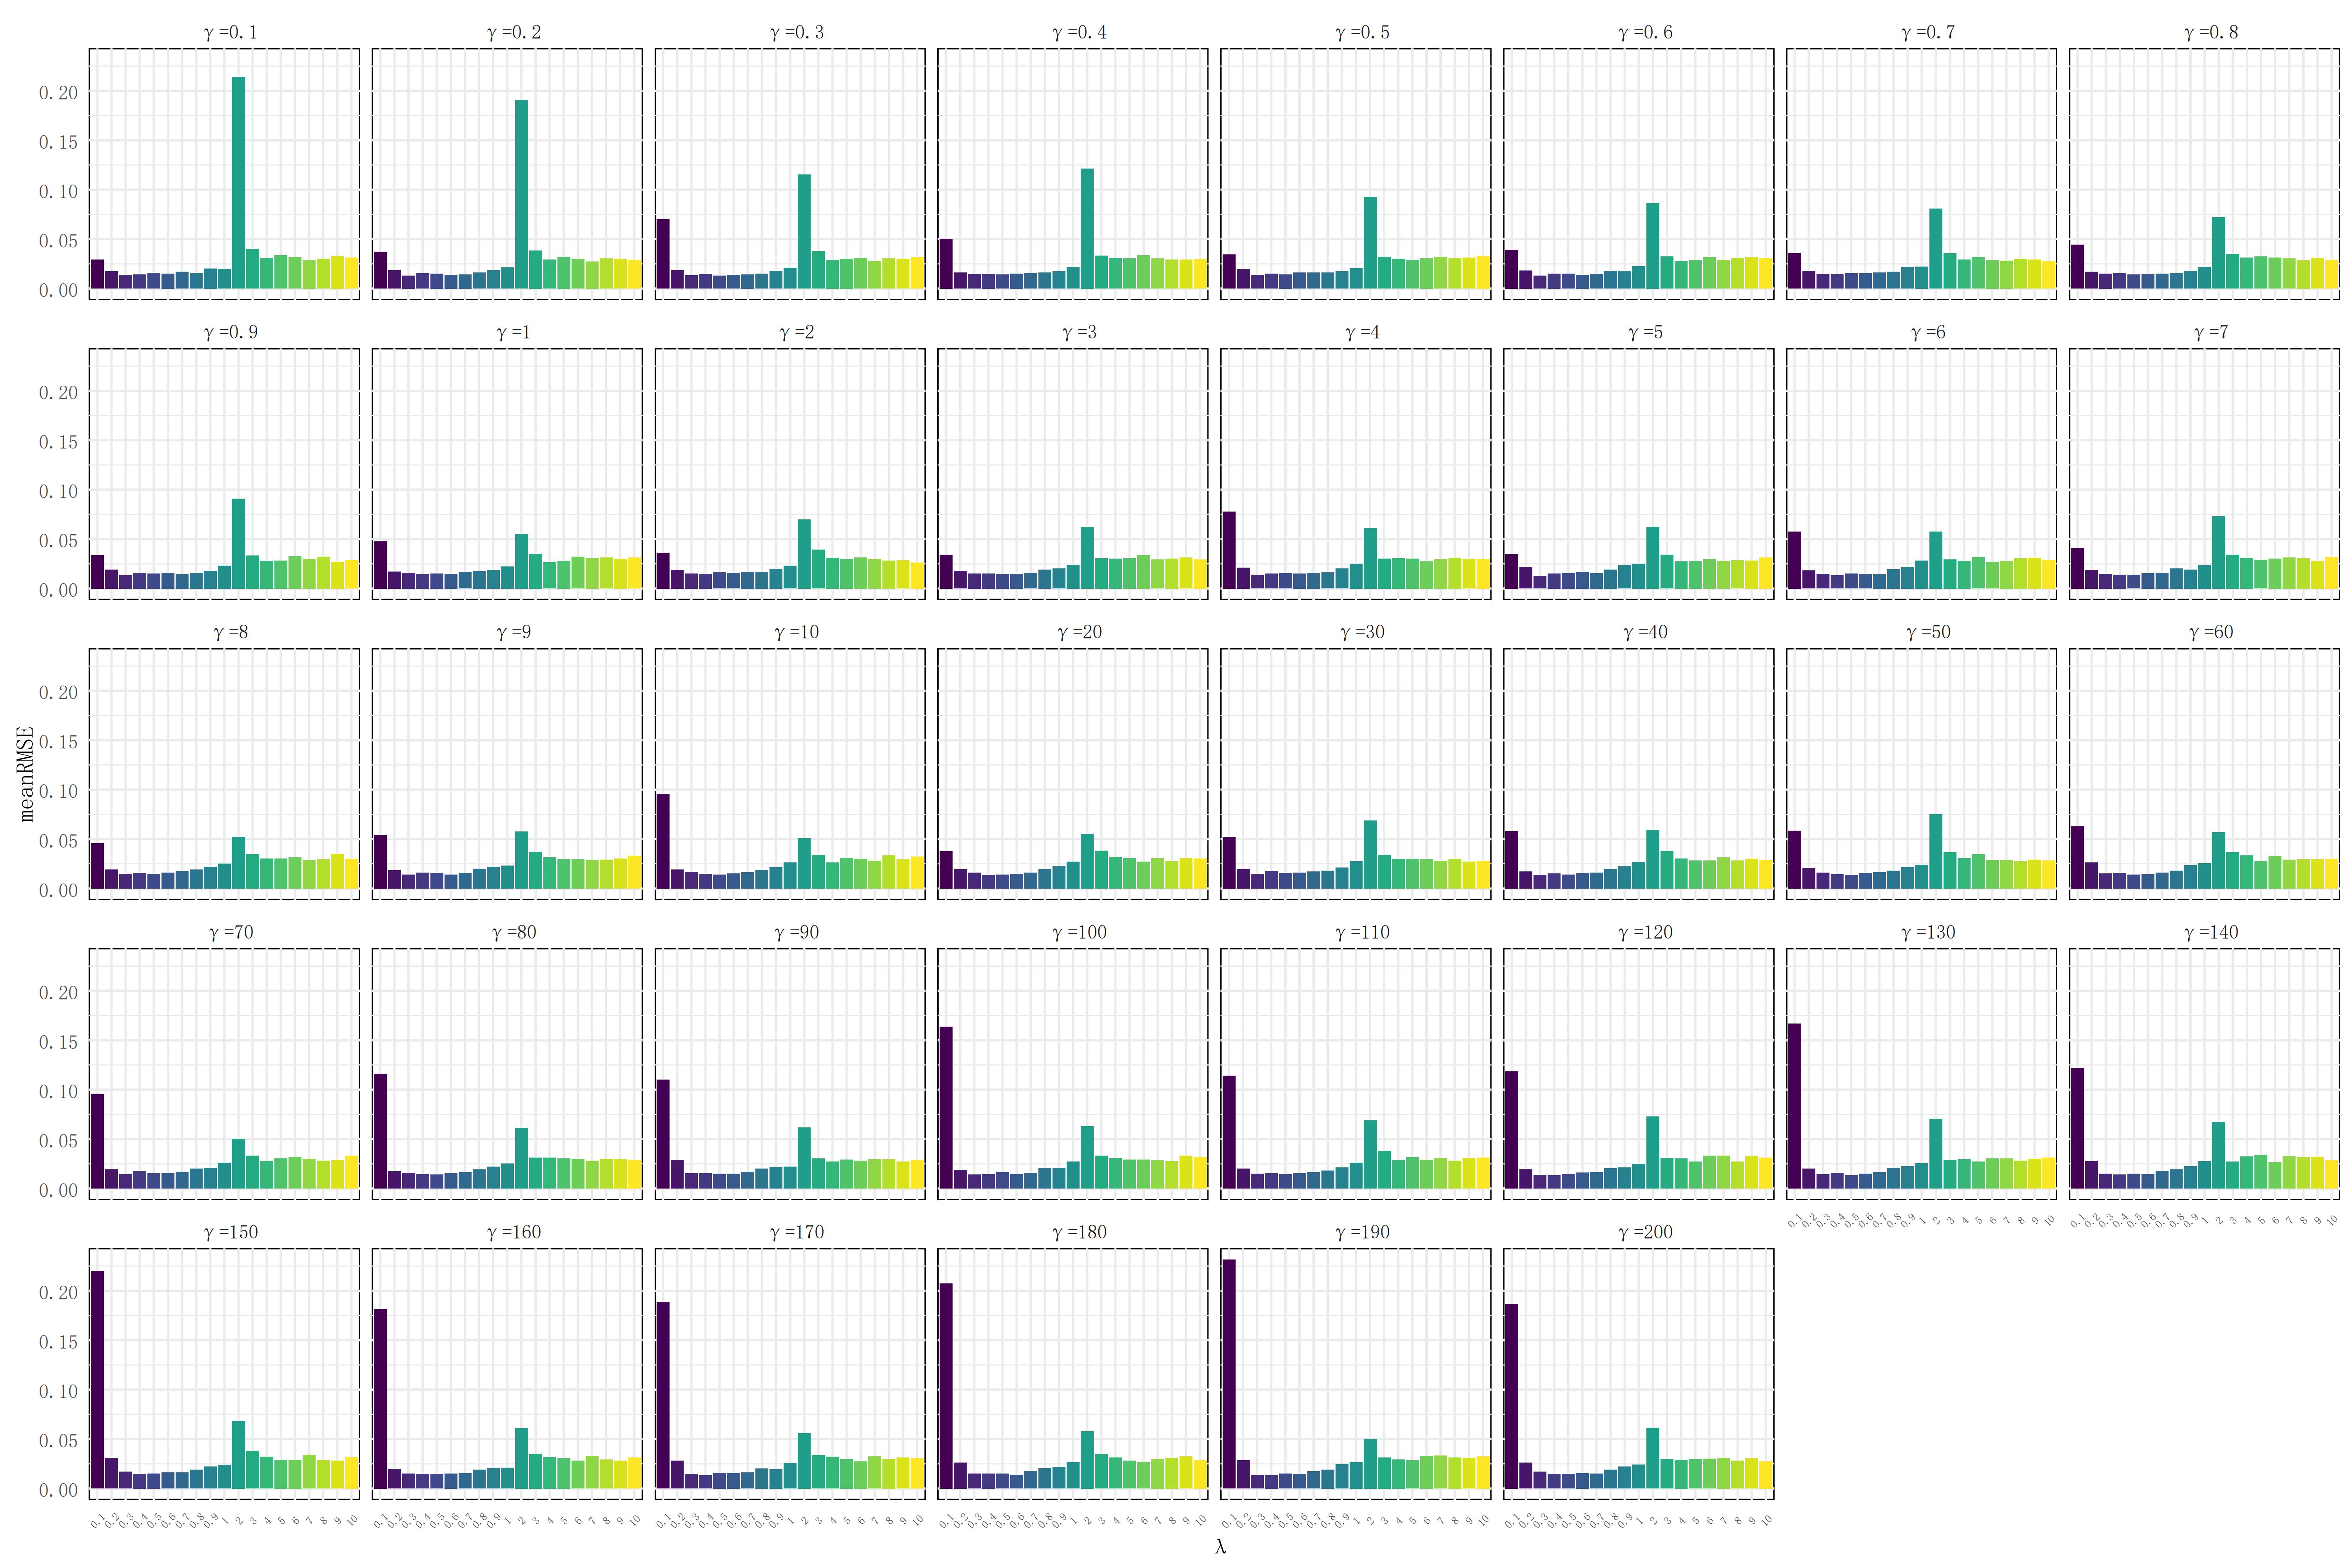


### Figure S50. RMSE of causal effect estimation (zero) in grid search in UVMR (recommend and )


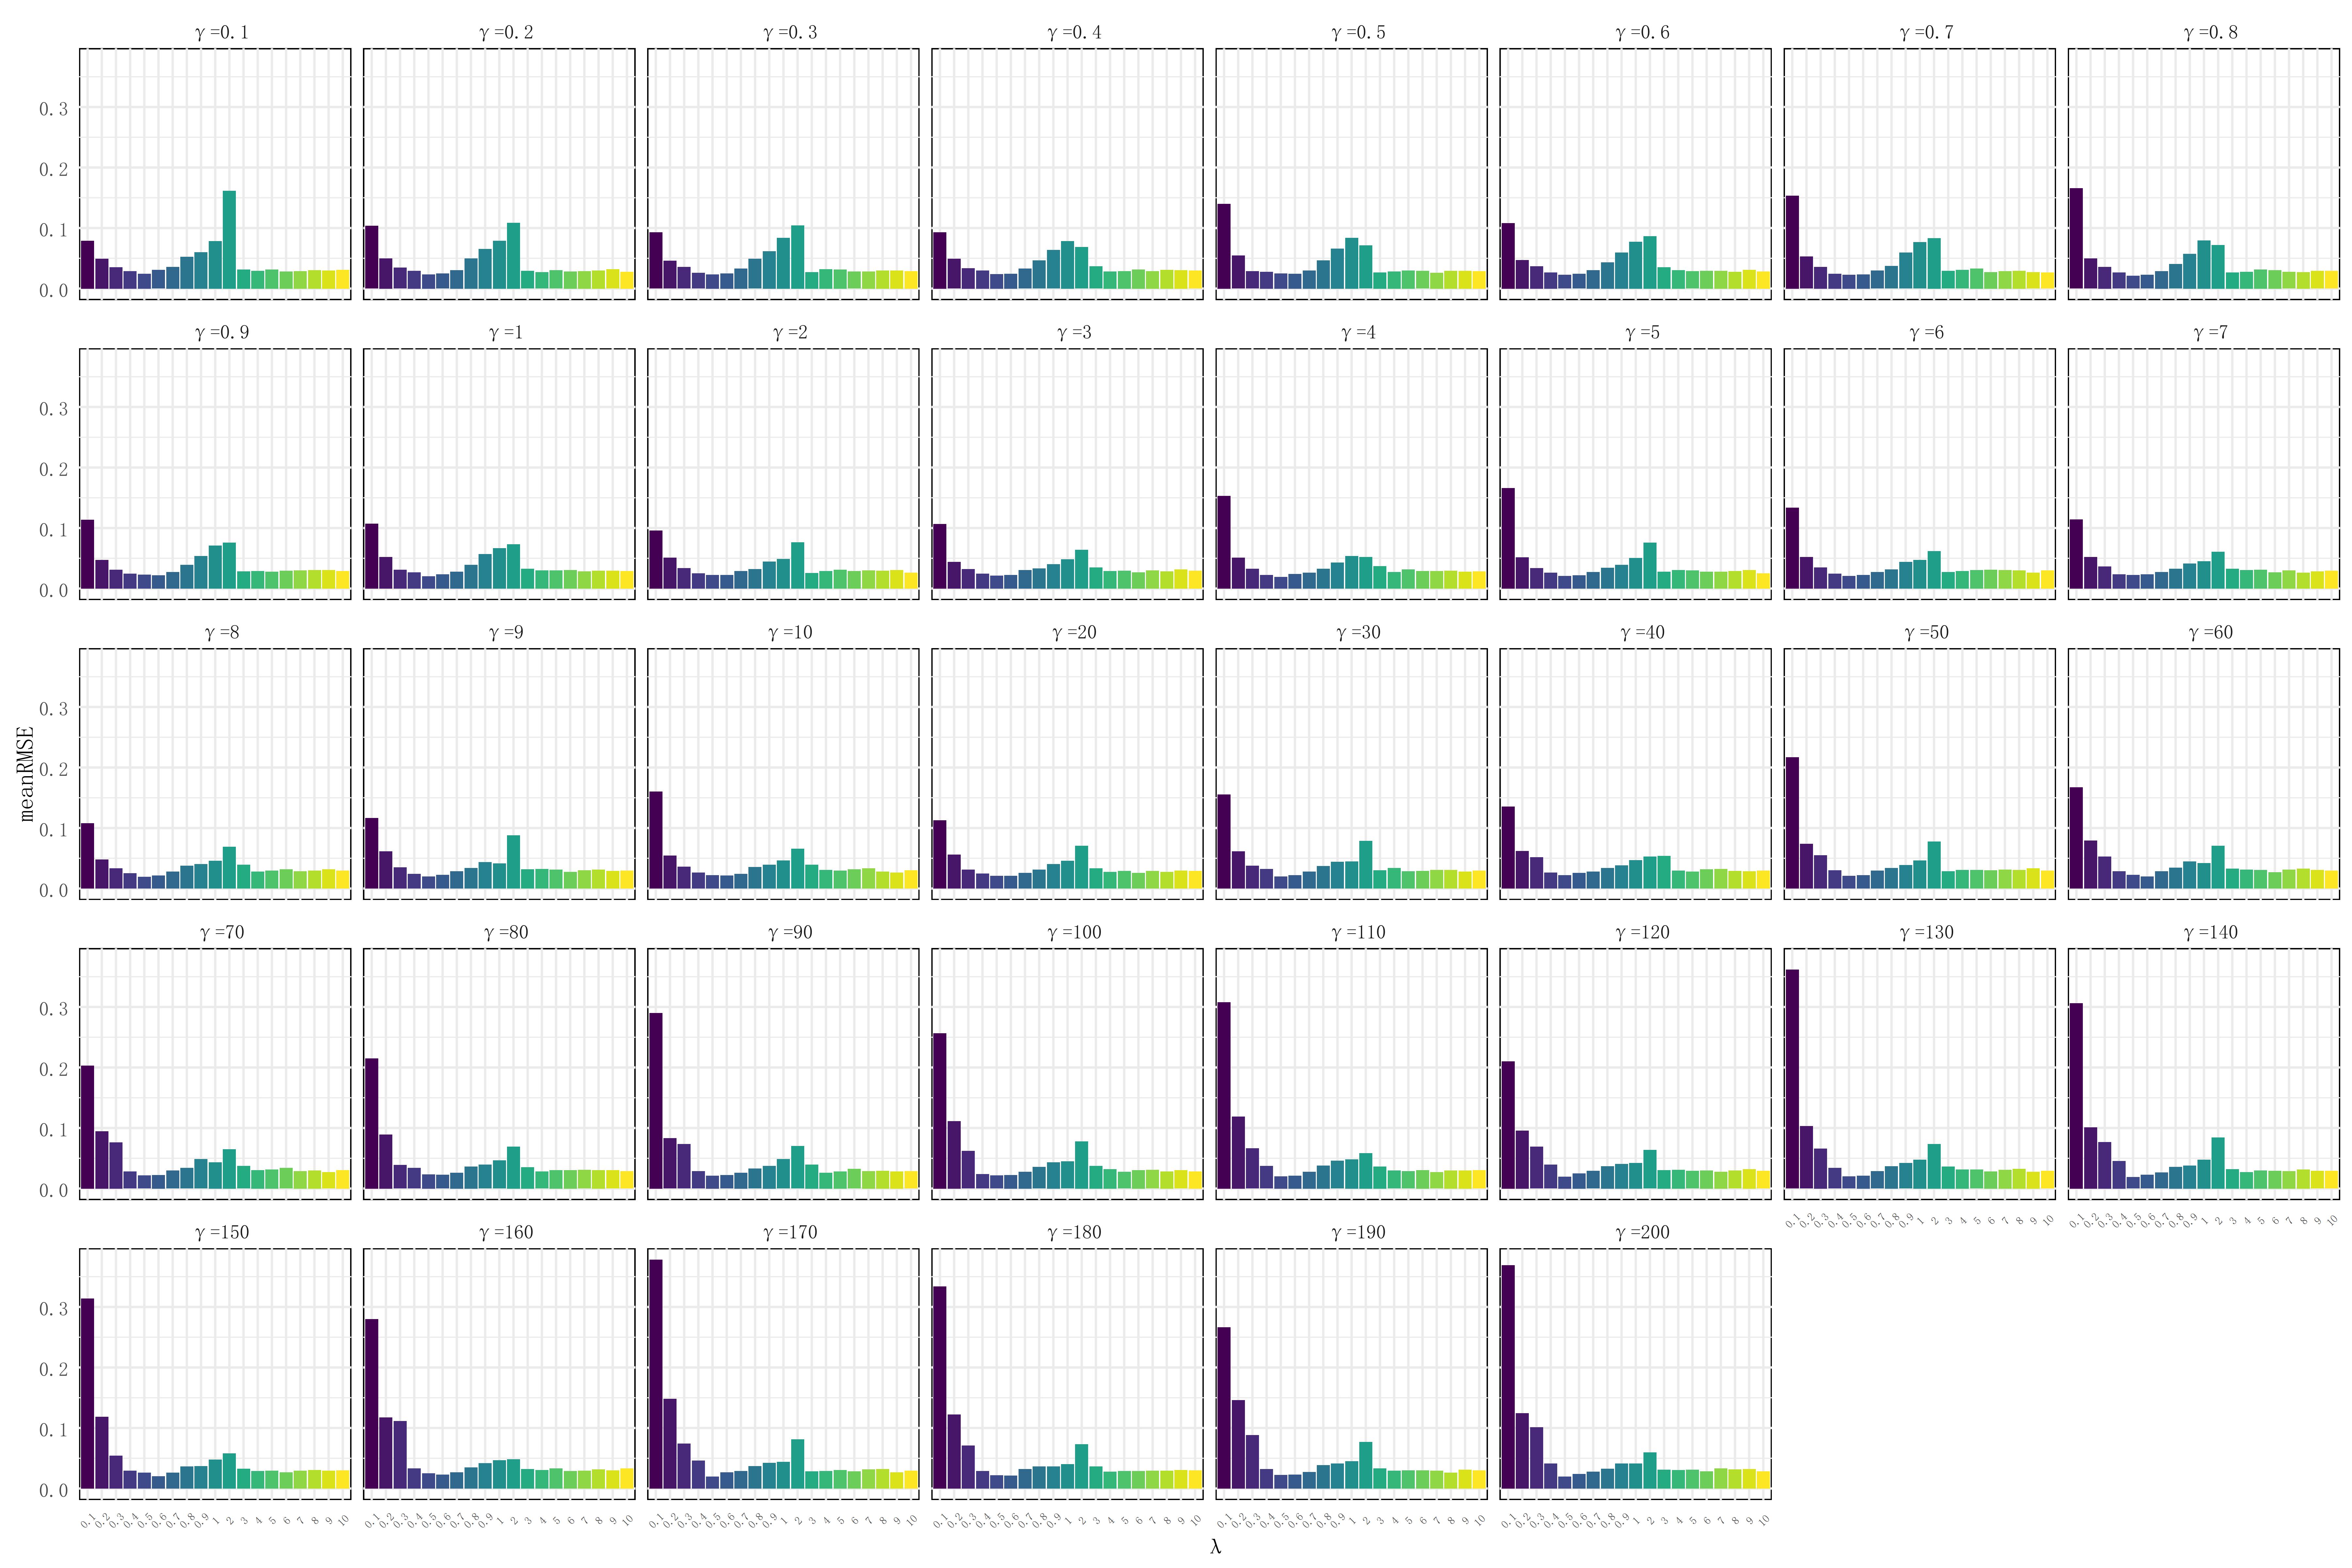


### Figure S51. RMSE of causal effect estimation (nonzero) in grid search in UVMR (recommend and )


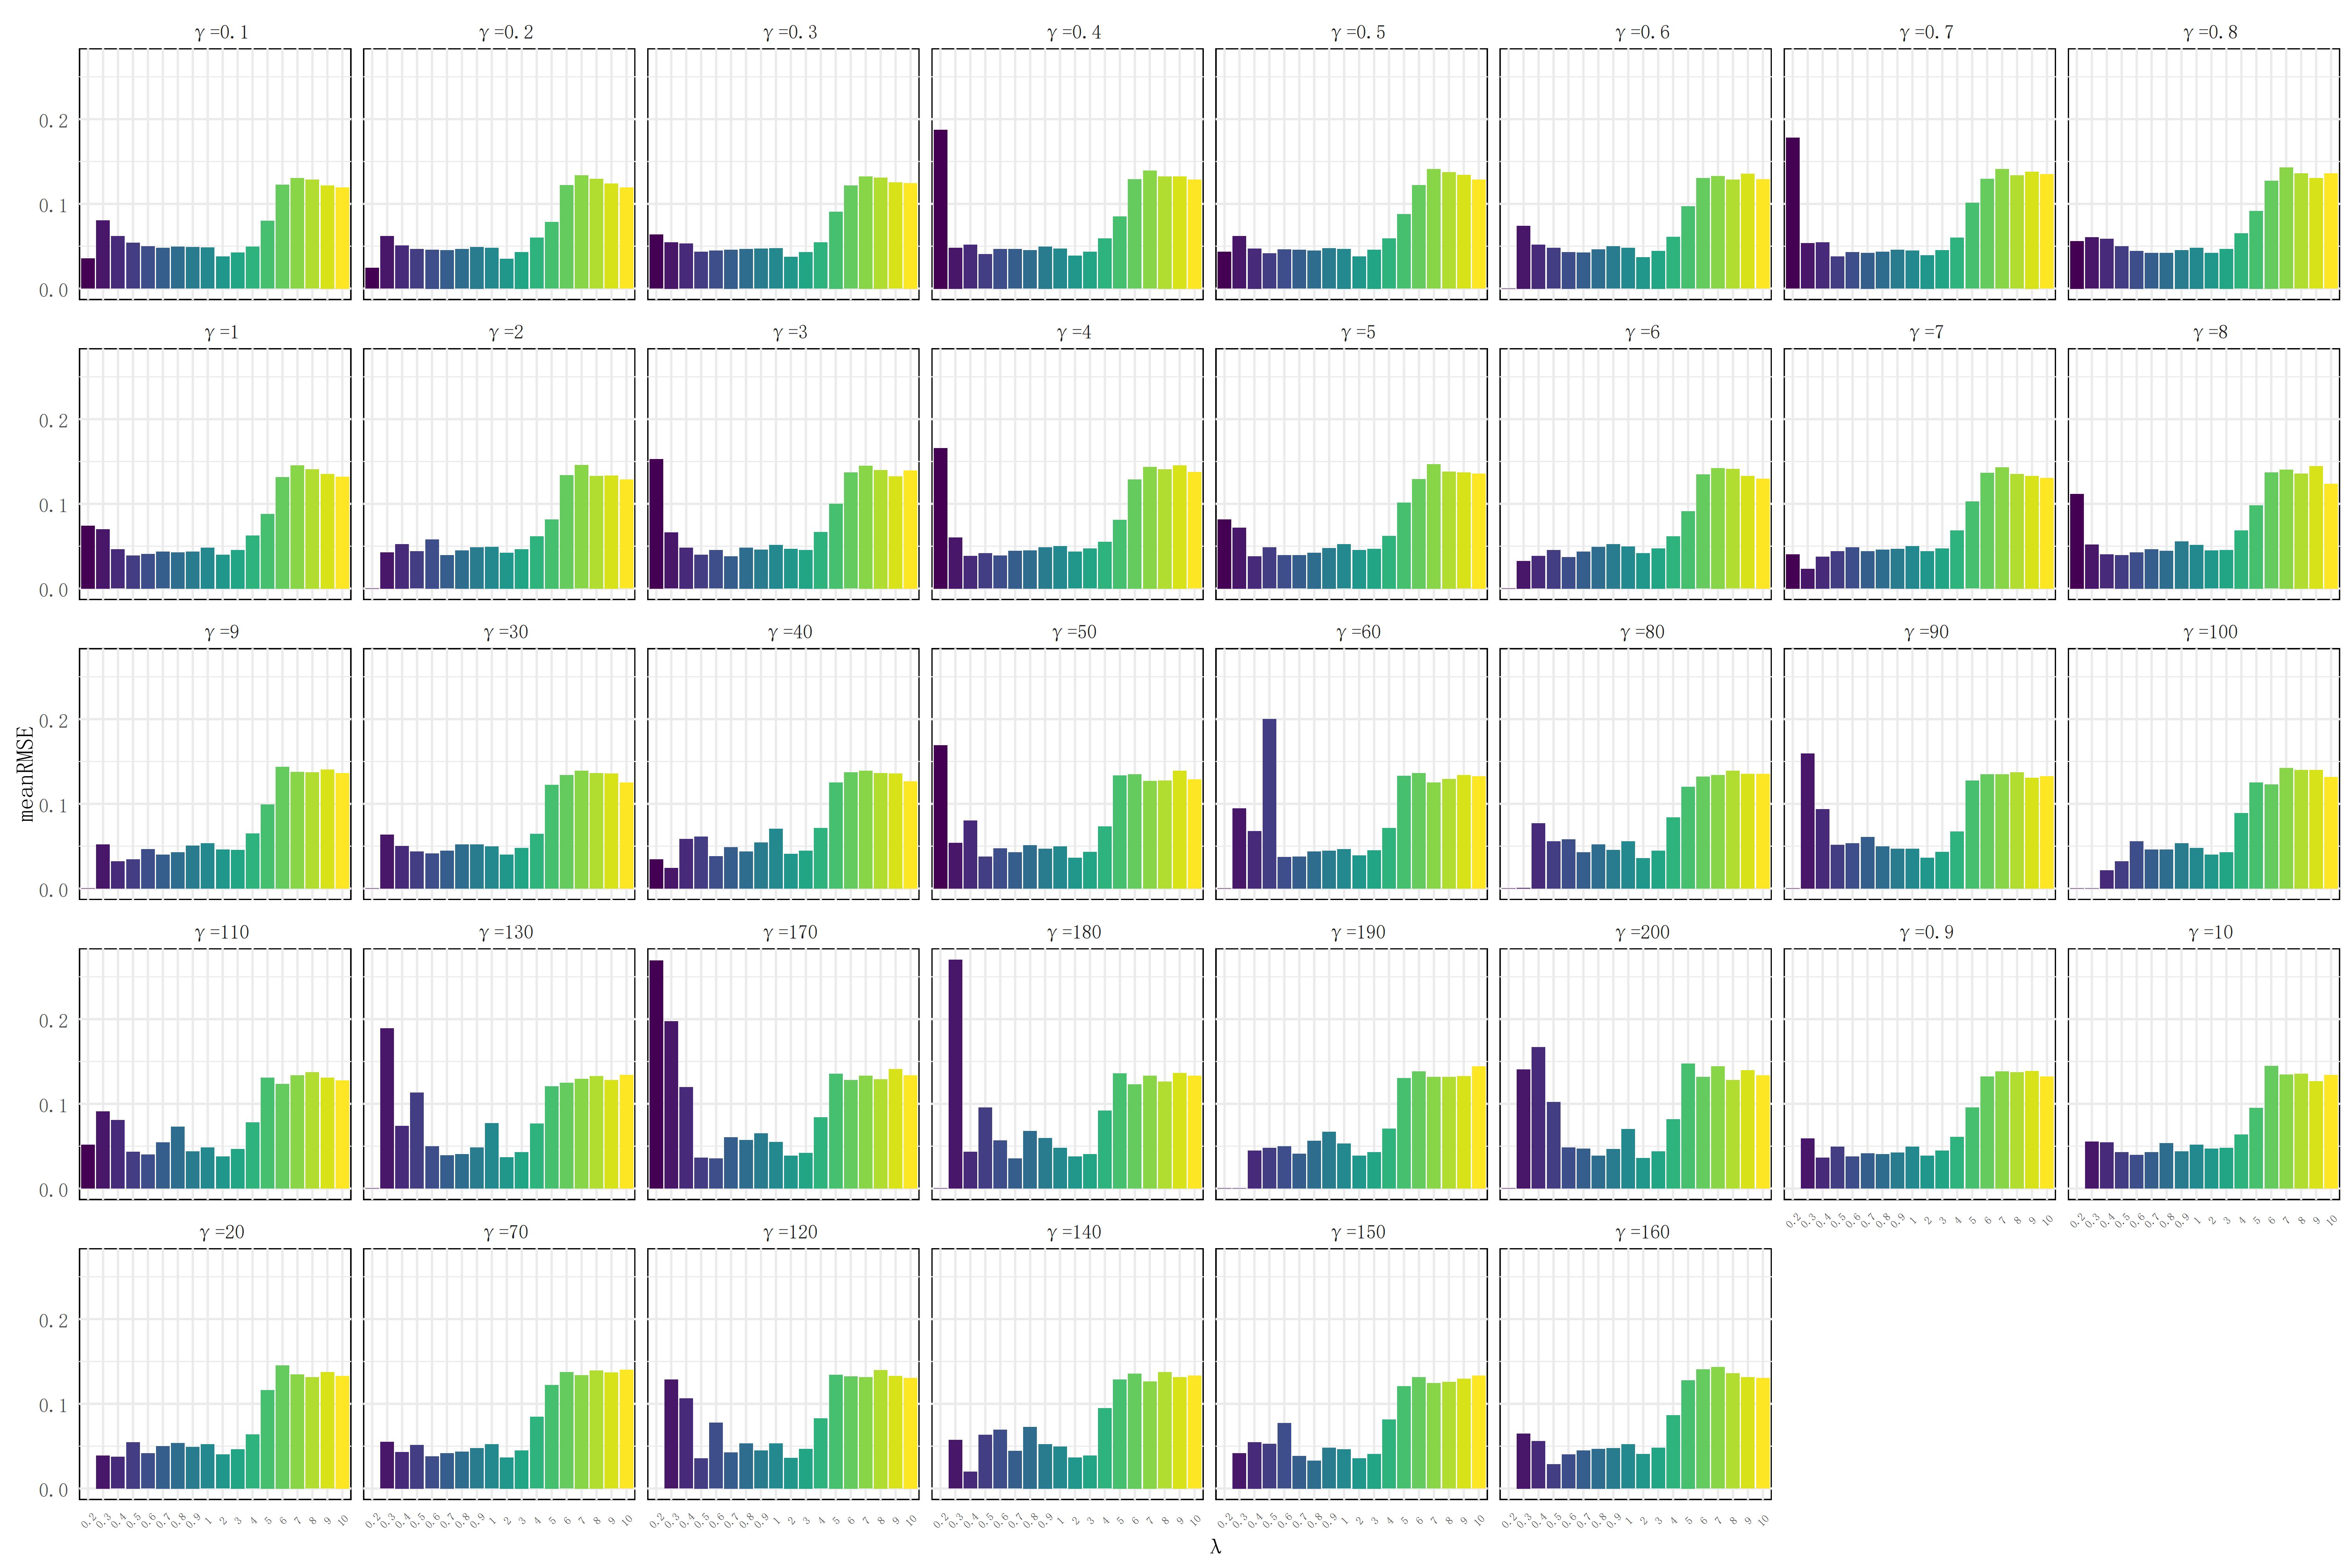


### Figure S52. RMSE of causal effect estimation in grid search in MVMR (P=8, recommend and )

## 9.2 Scenario (b): uncorrelated pleiotropy


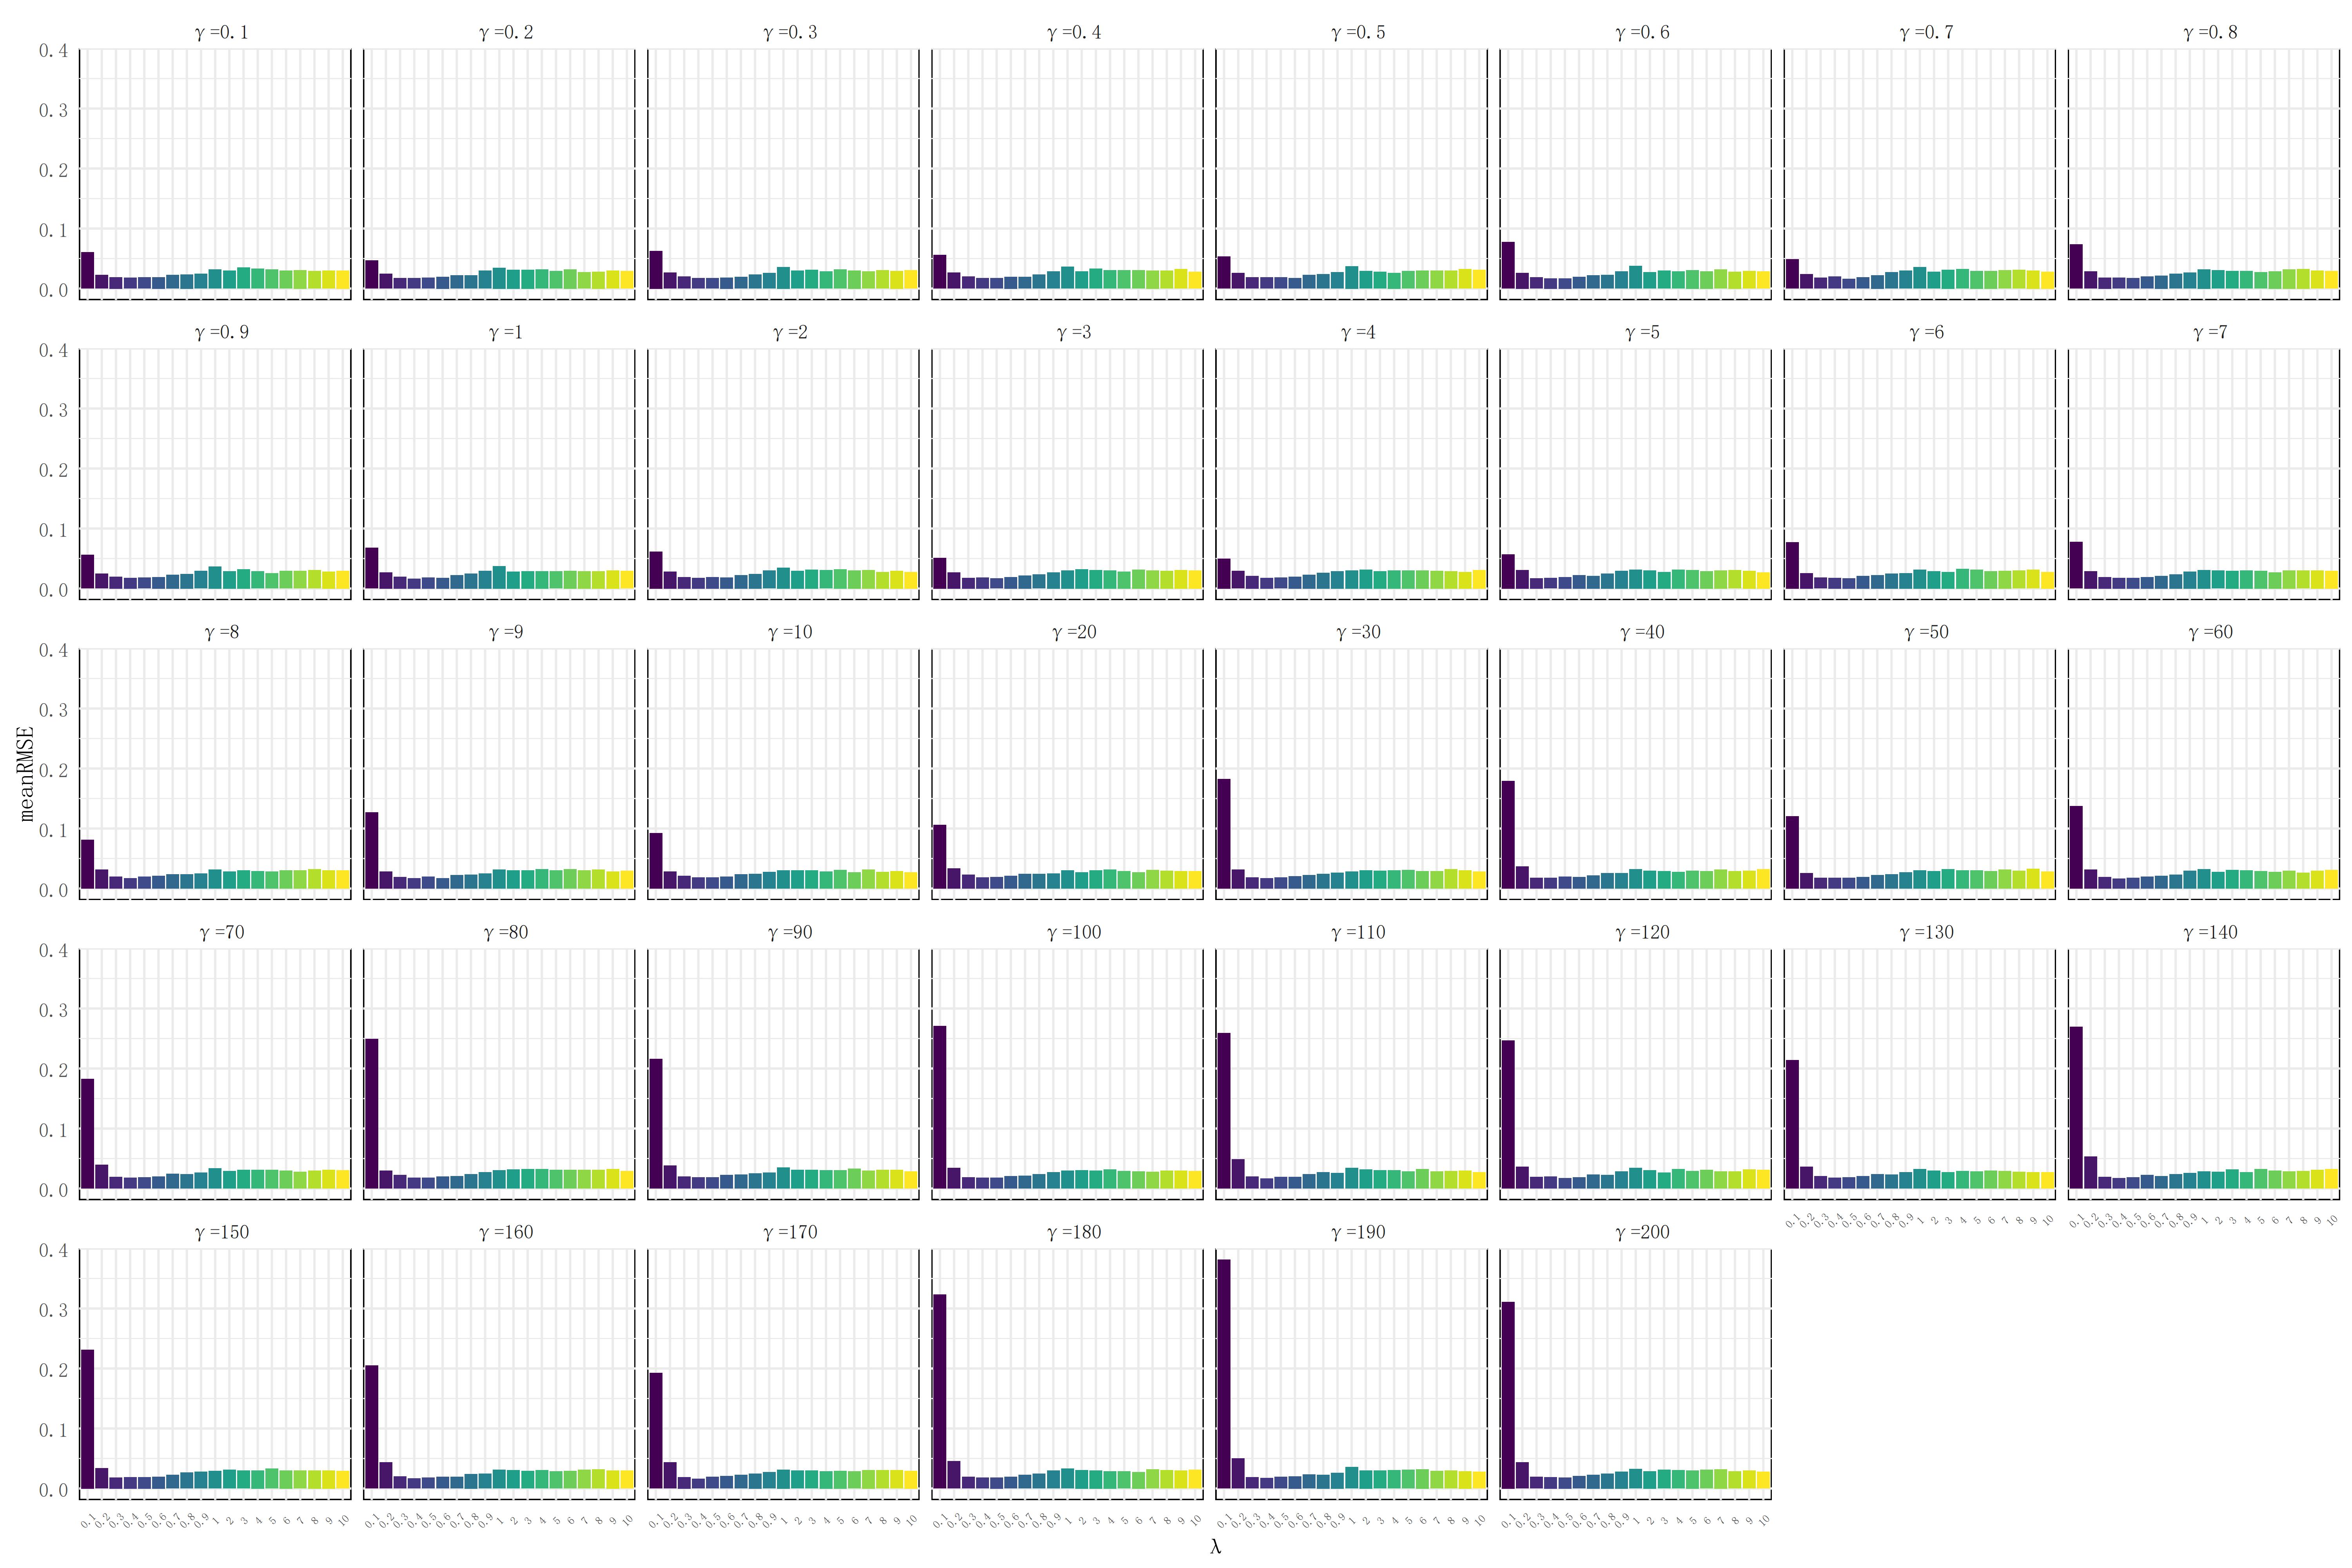


### Figure S53. RMSE of causal effect estimation (zero) in grid search in UVMR (recommend and )


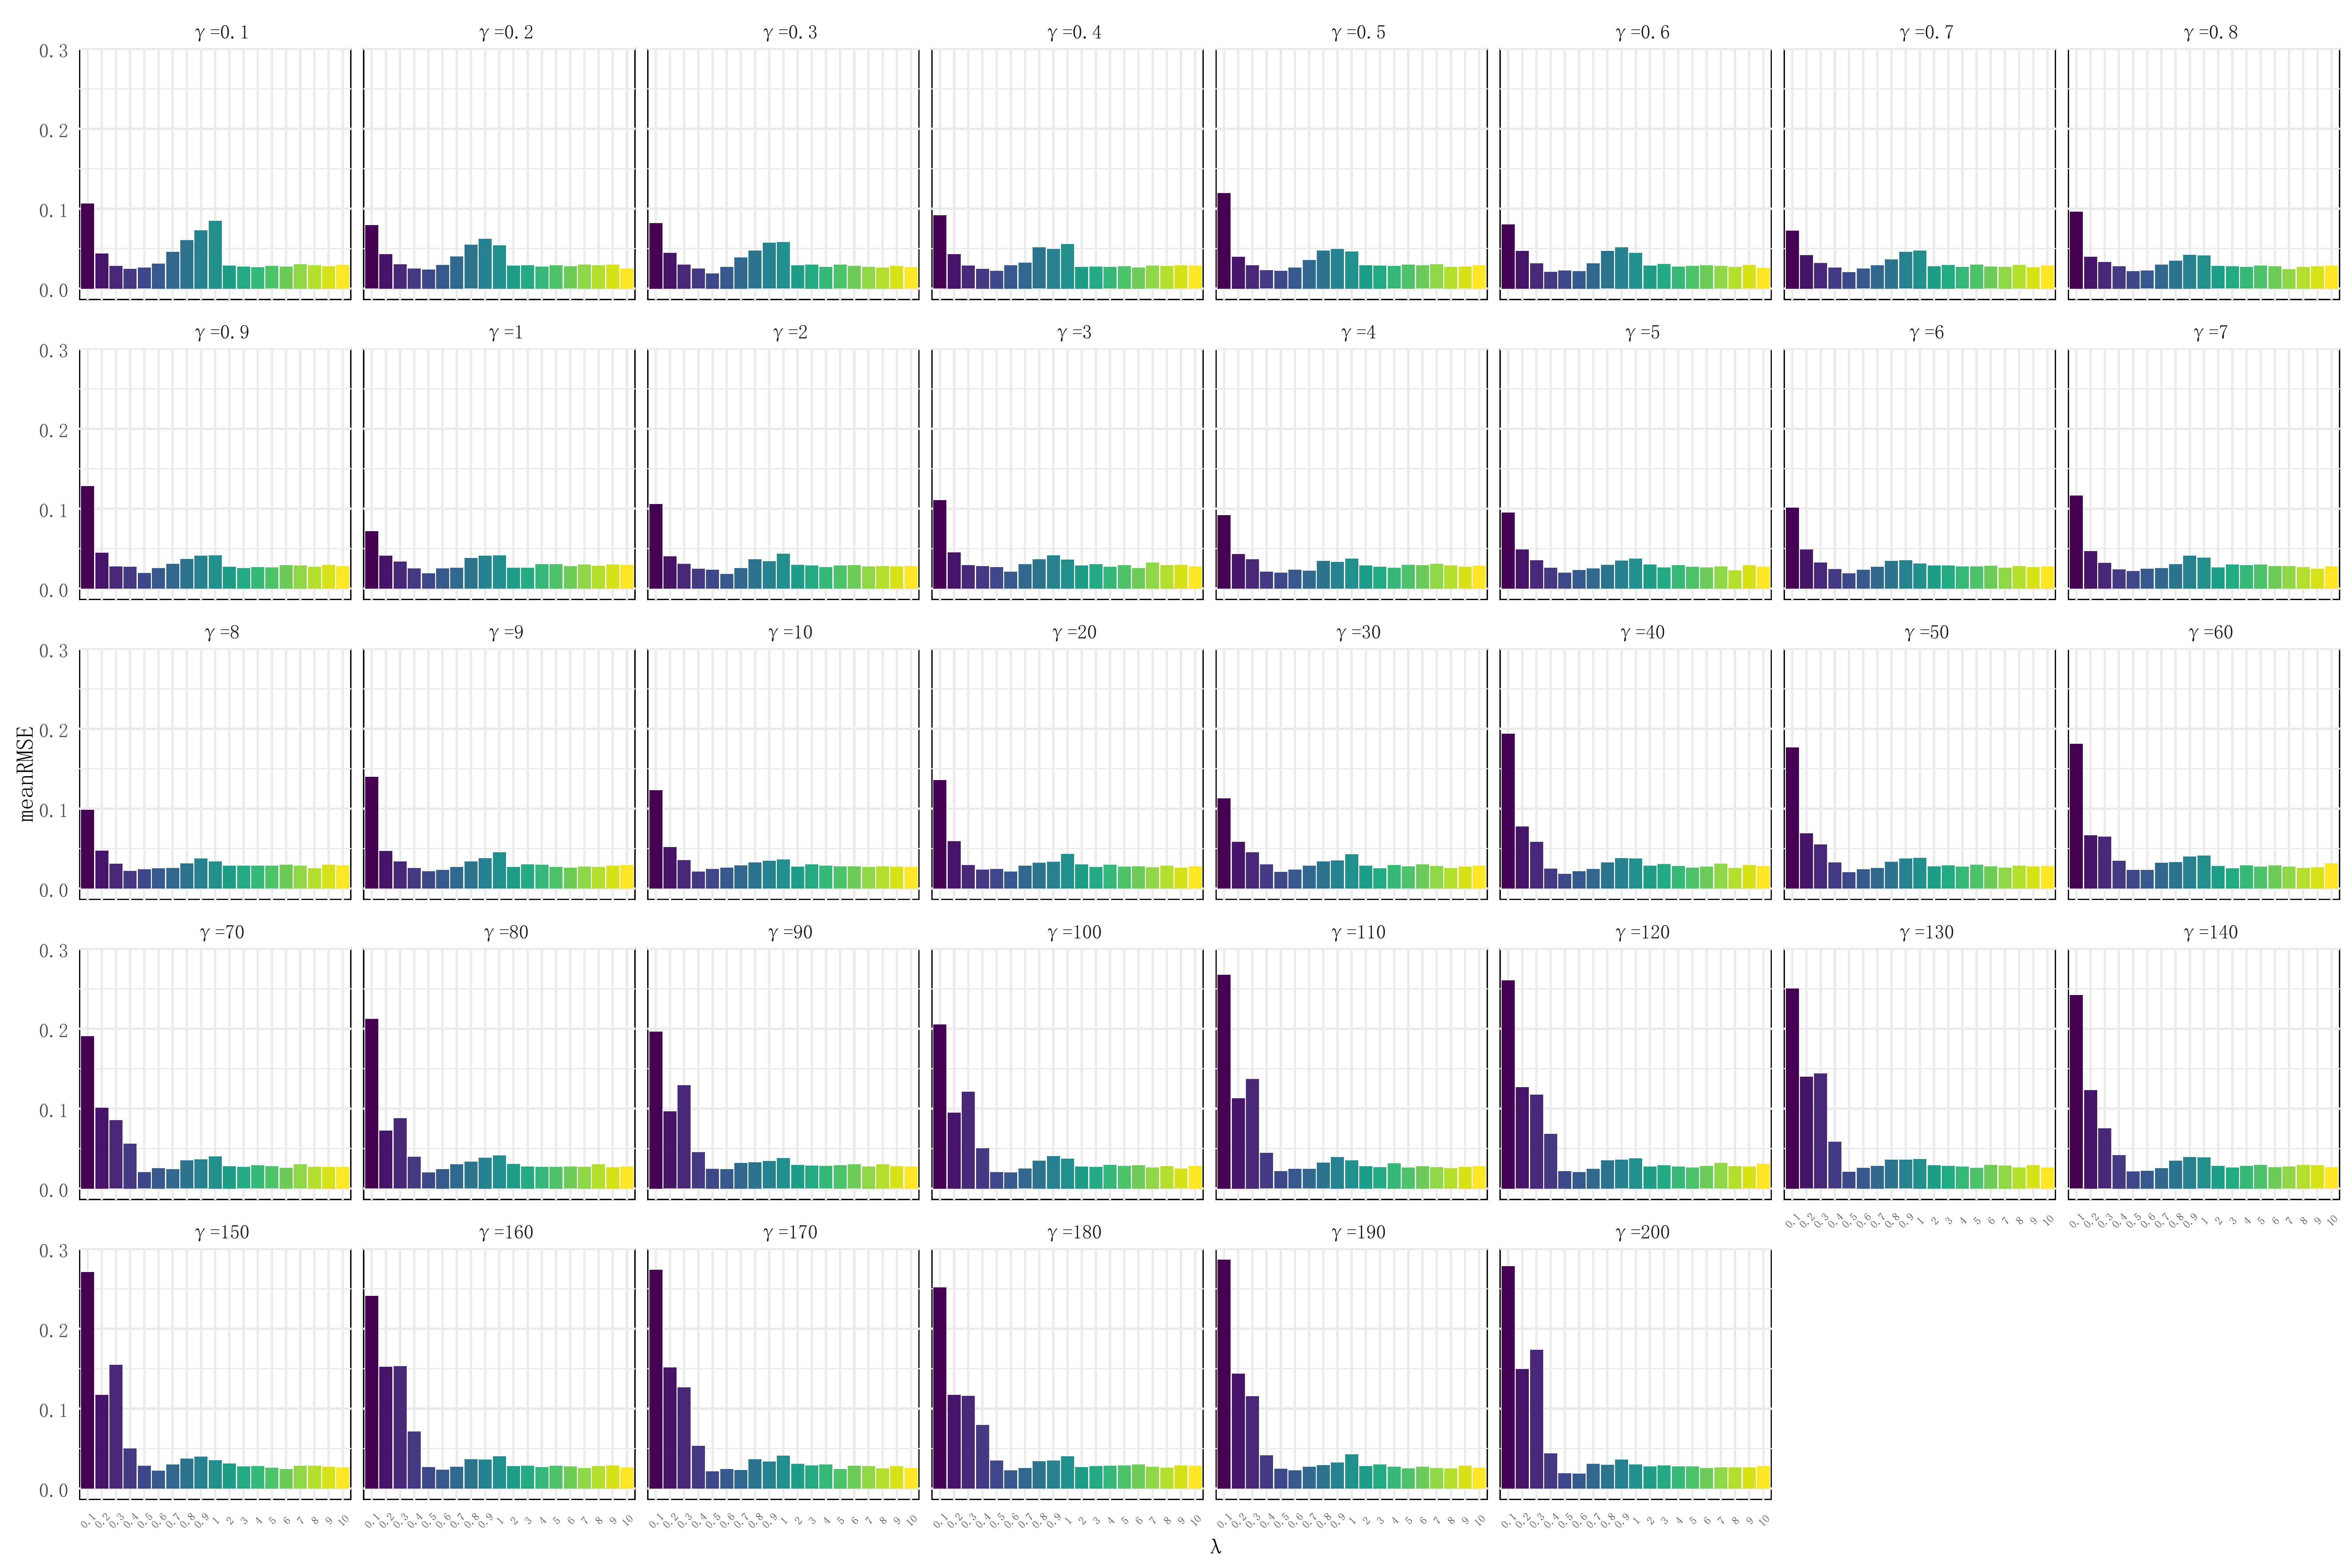


### Figure S54. RMSE of causal effect estimation (nonzero) in grid search in UVMR (recommend and )


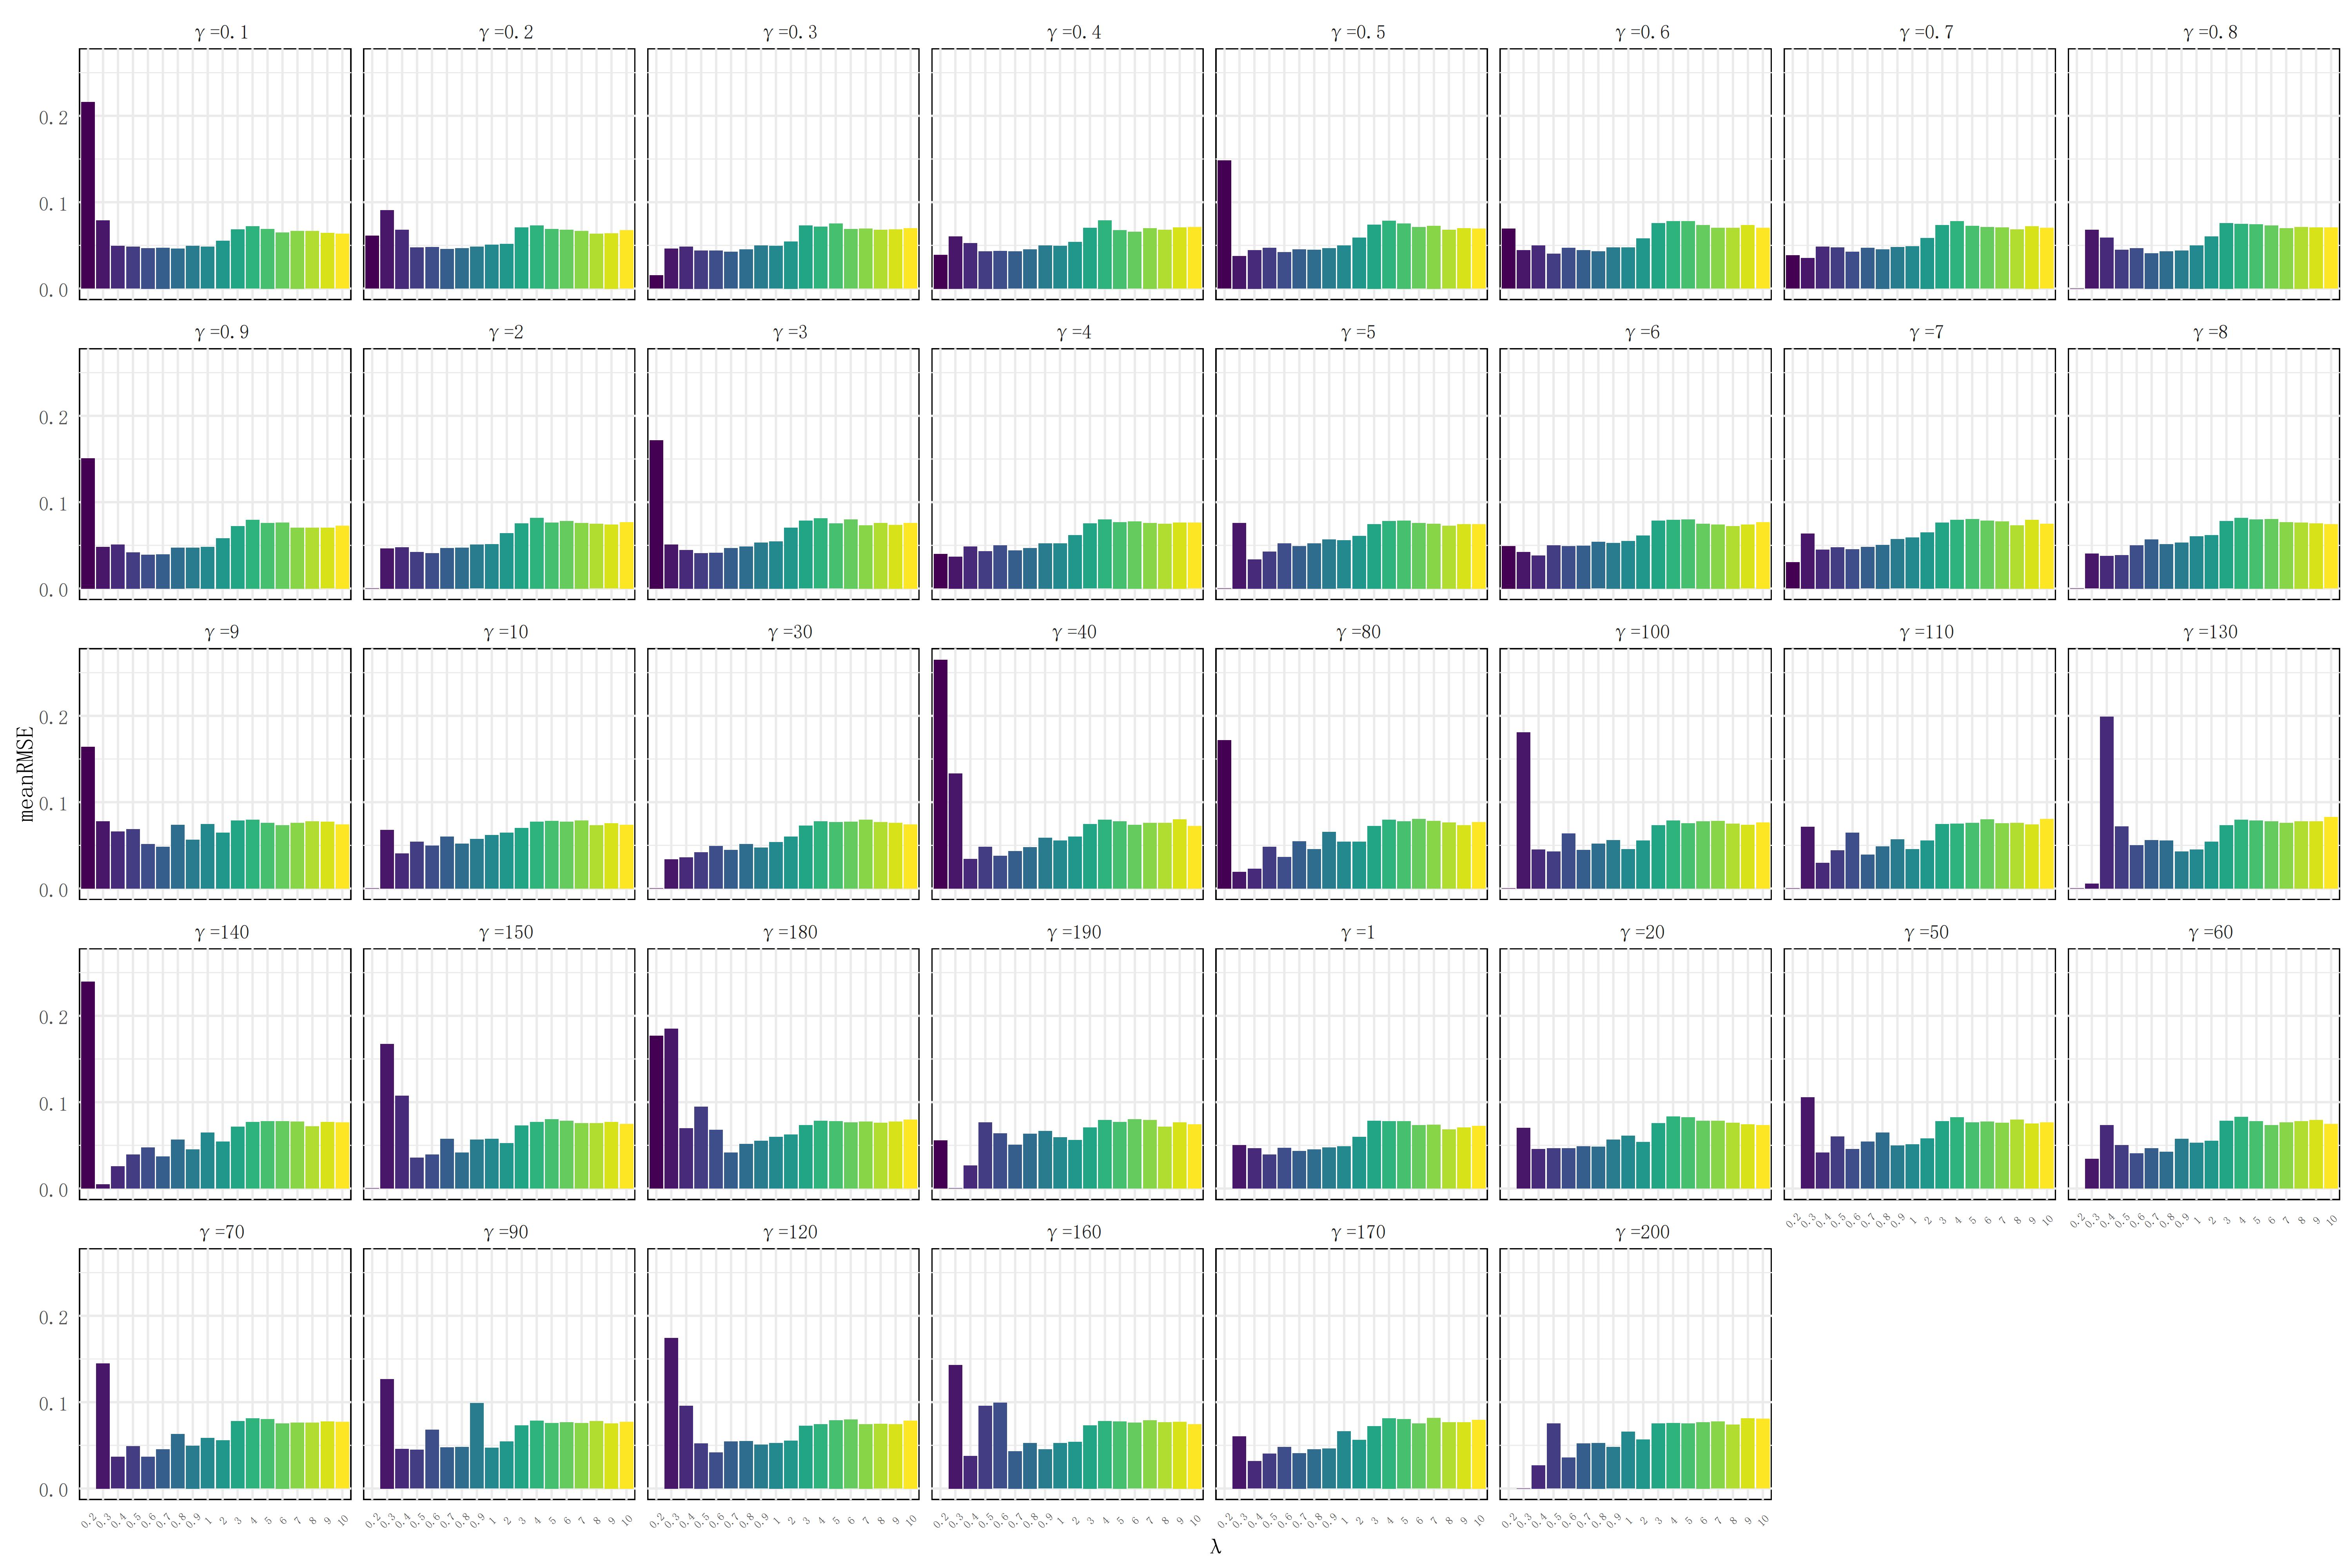


### Figure S55. RMSE of causal effect estimation in grid search in MVMR (P=8, recommend and )

## 9.3 Scenario (c): No pleiotropy


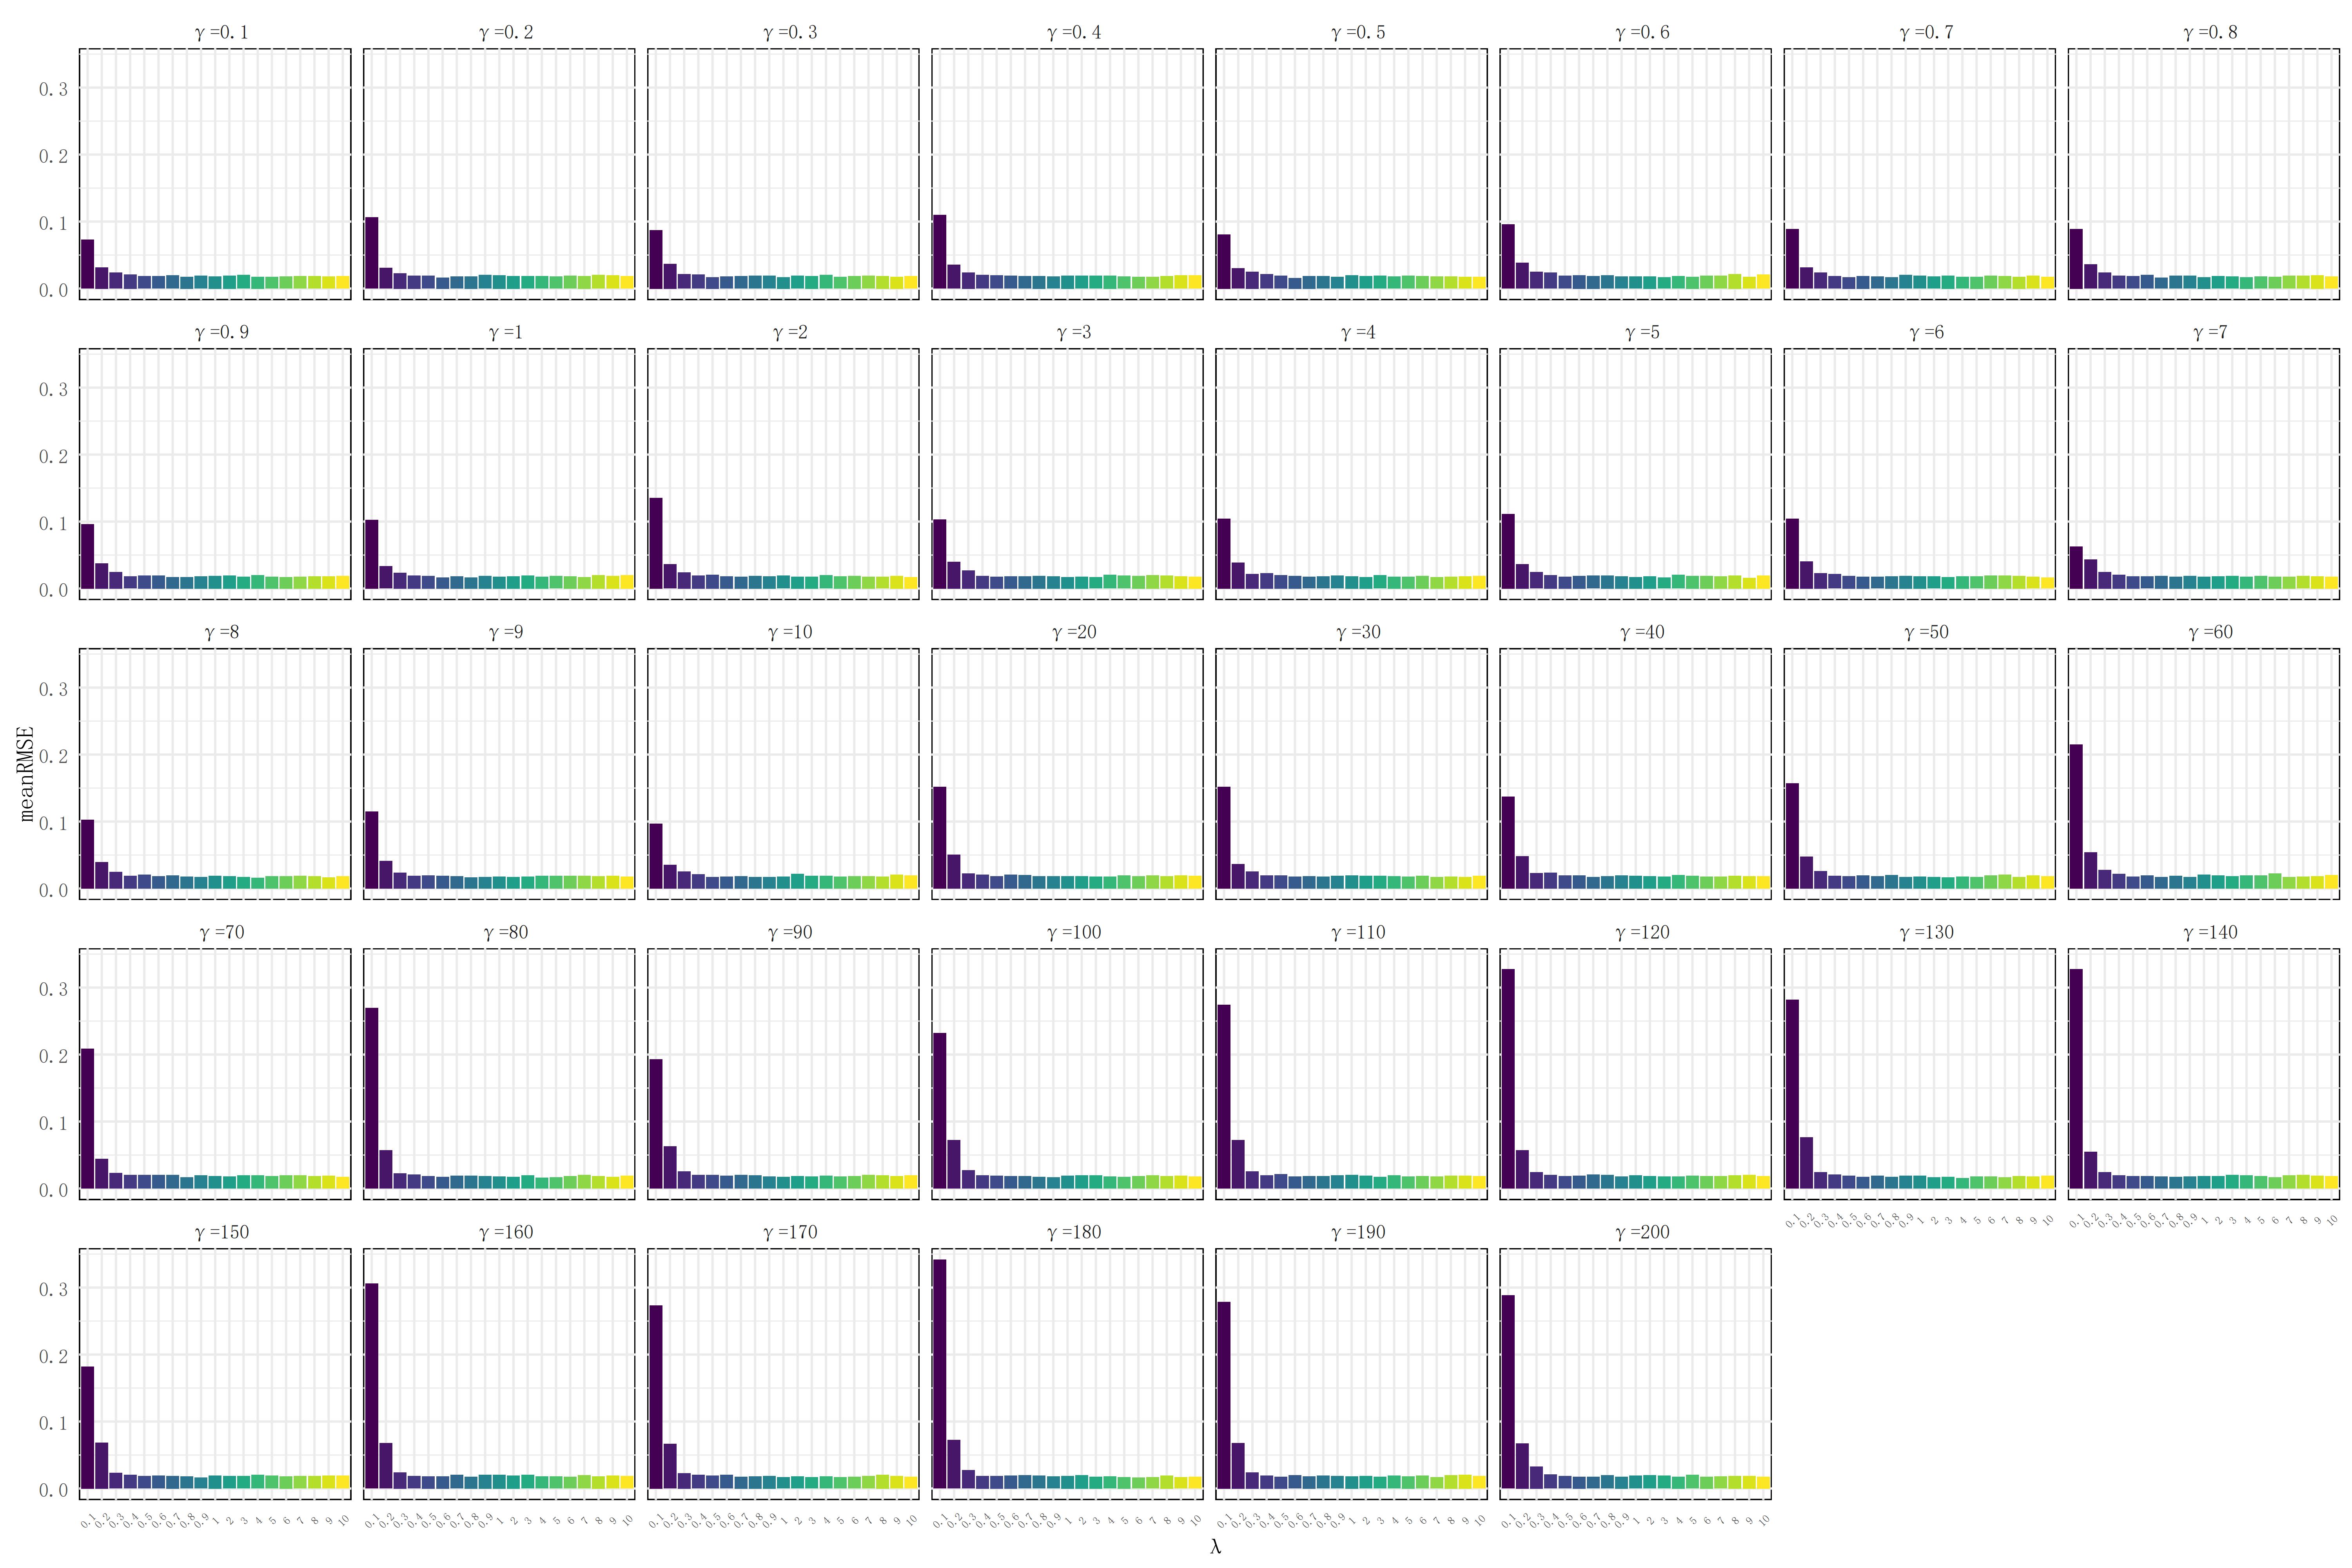


### Figure S56. RMSE of causal effect estimation (zero) in grid search in UVMR (recommend and )


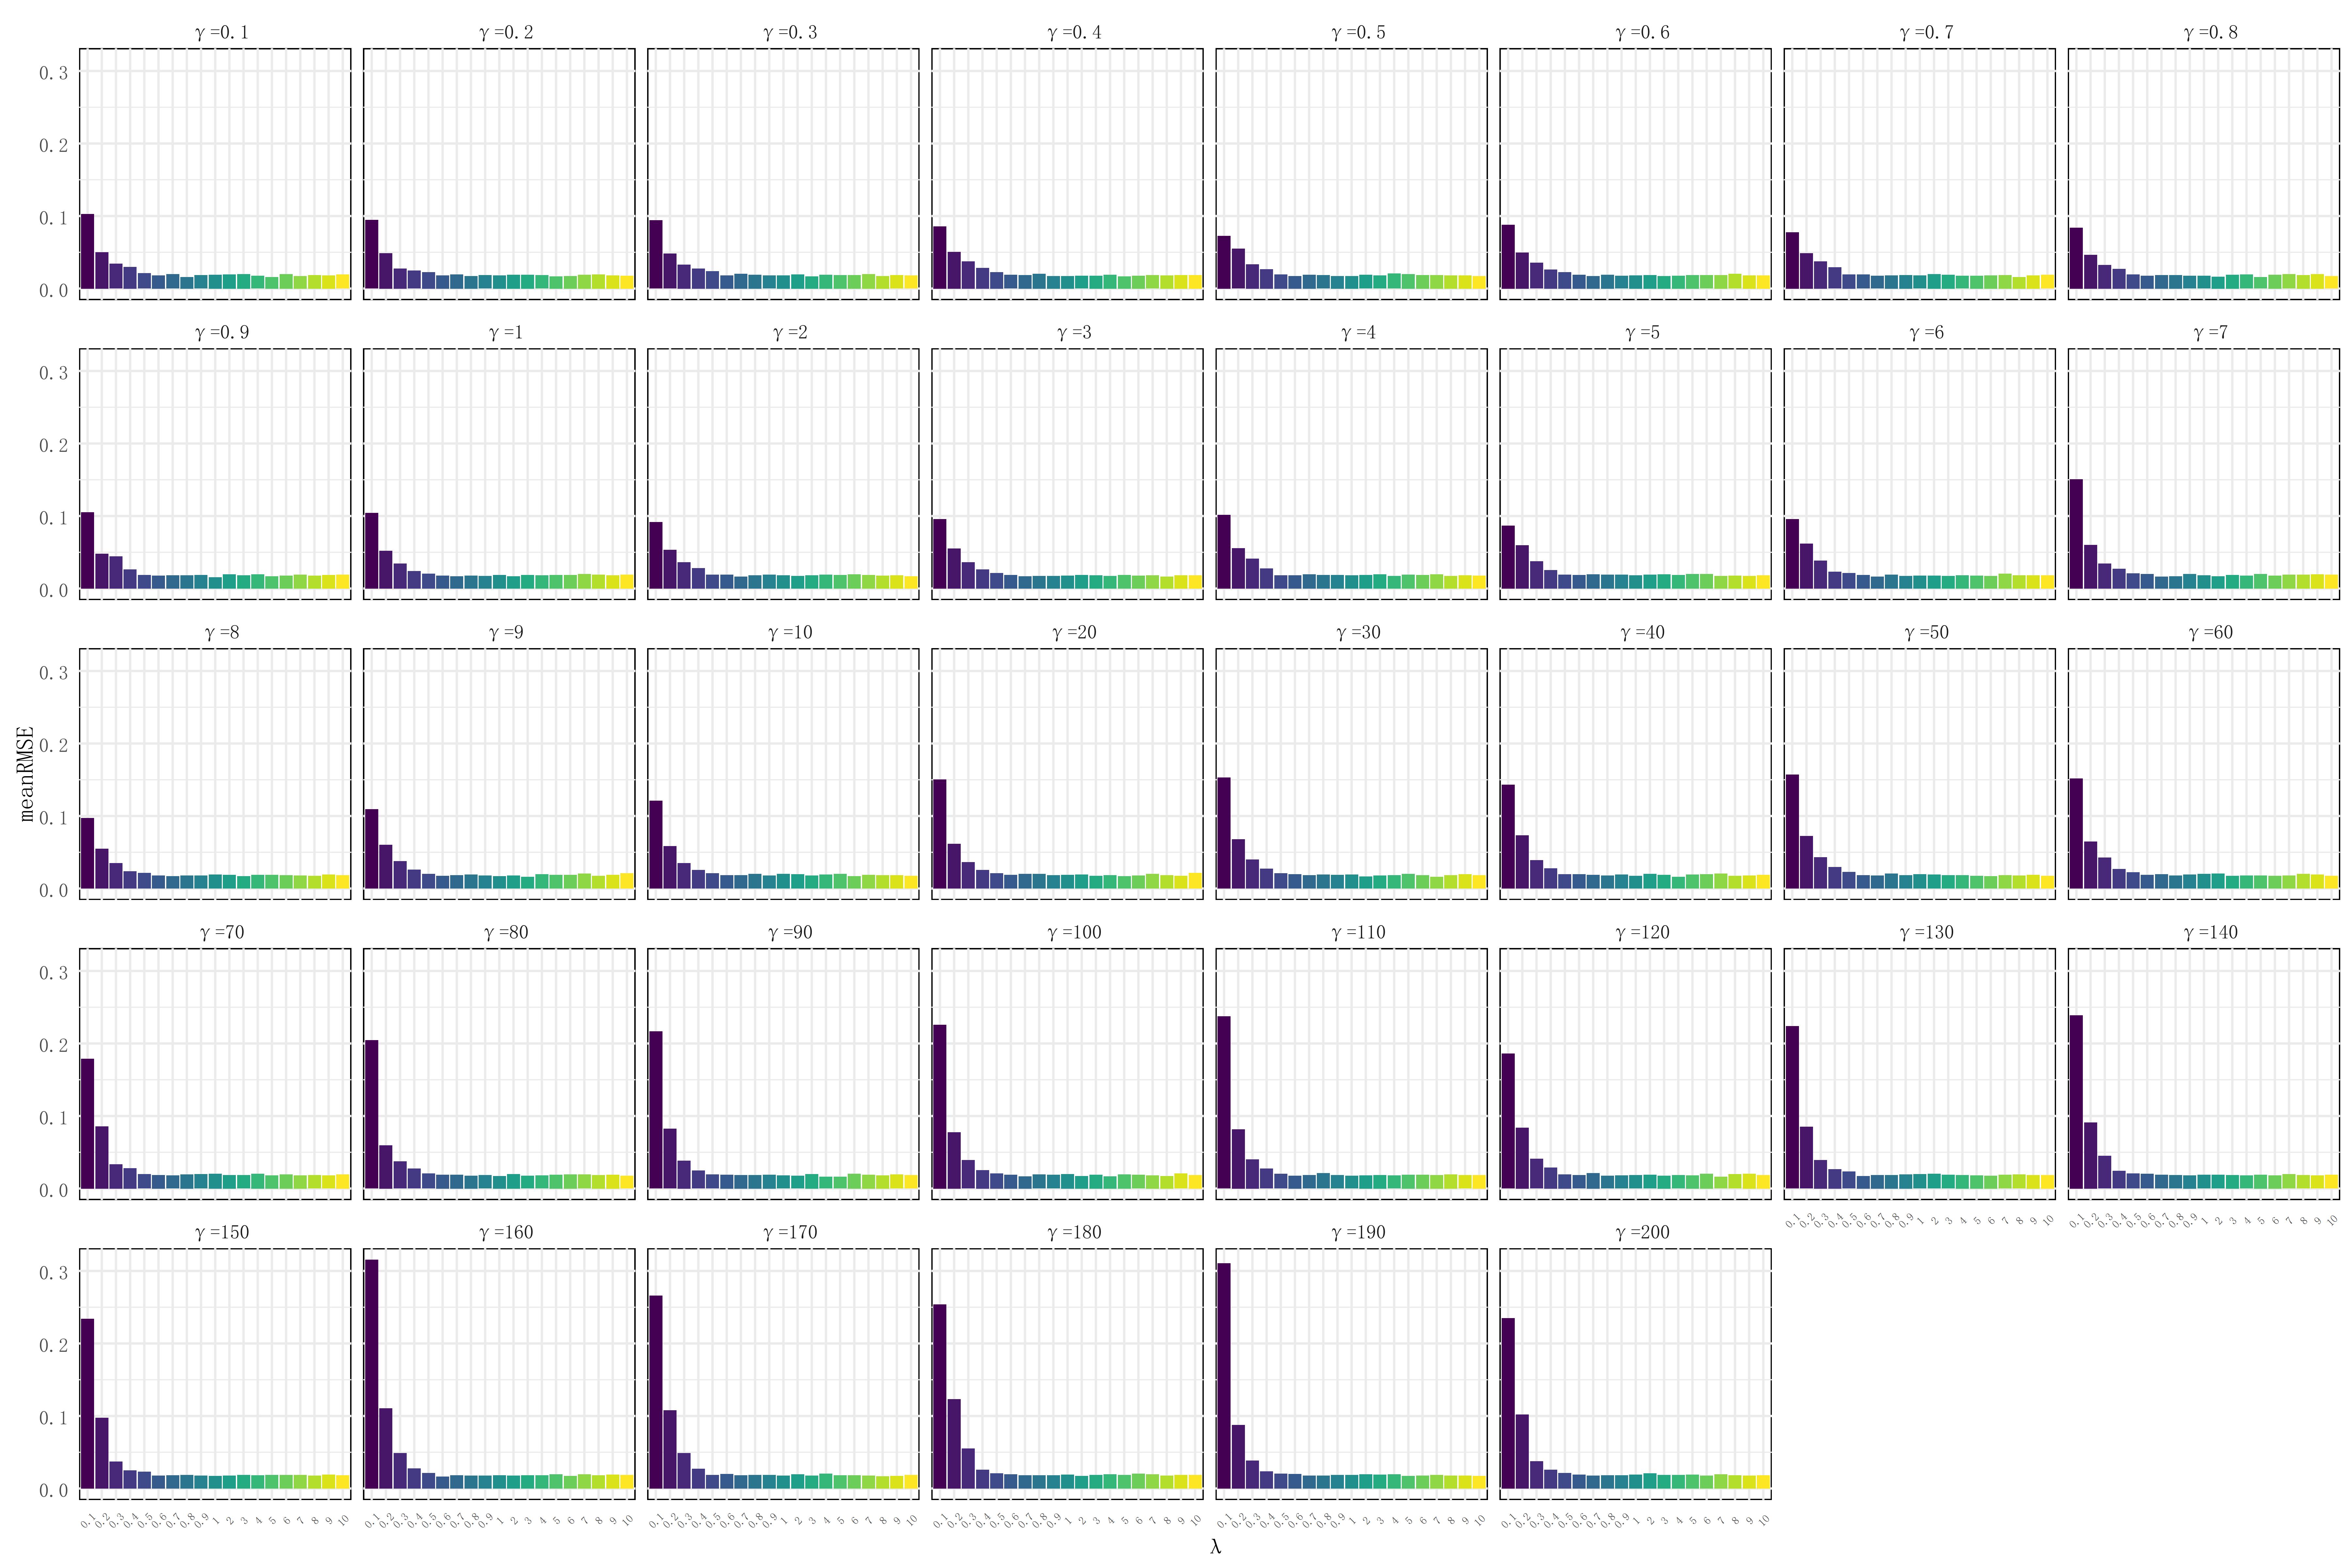


### Figure S57. RMSE of causal effect estimation (nonzero) in grid search in UVMR (recommend and )


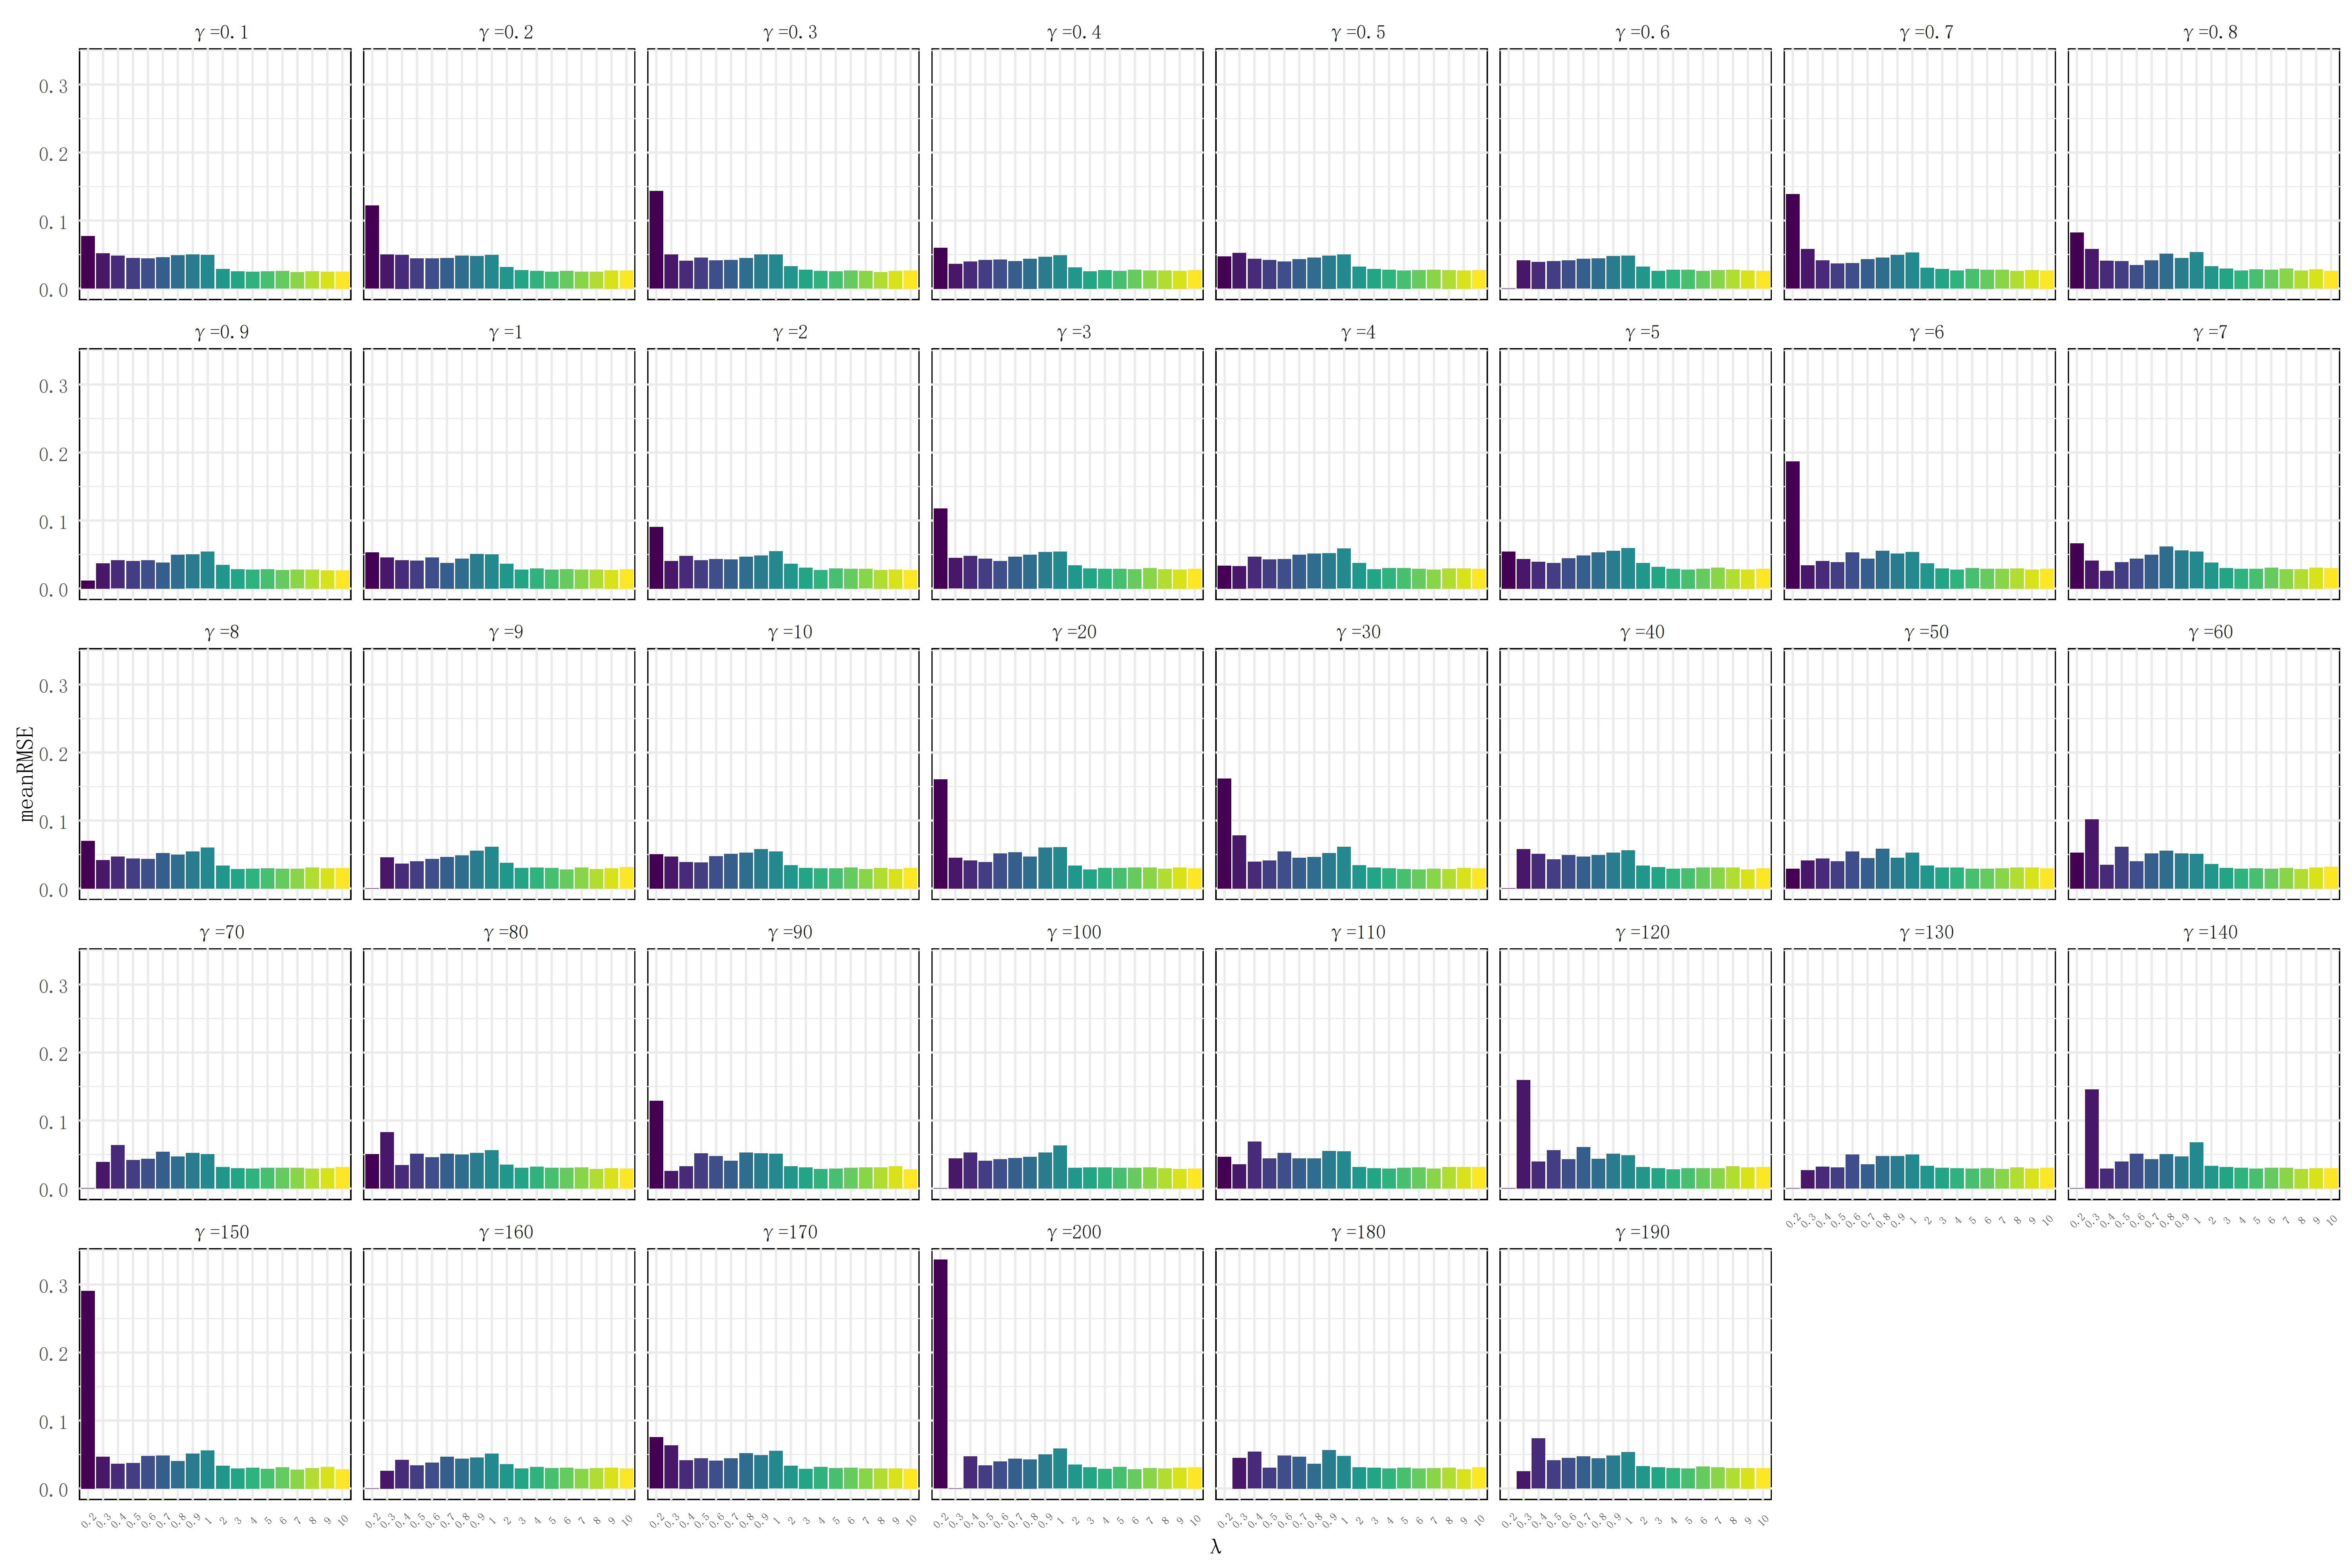


### Figure S58. RMSE of causal effect estimation in grid search in MVMR (P=8, recommend and )
