# Supplementary material for: Invariance-based Mendelian Randomization Method Integrating Multiple Heterogeneous GWAS Summary Datasets
Source: Research Square preprint supplement (doi:10.21203/rs.3.rs-5602368/v1), 2024-12-17
Supplement: Supplementary file 2 [file 5e4ba20921bfb3d035d4b9cd.xlsx]

## Sheet: Table S1
Table S1. Summary of I2 in scenerio(a)
	Min.	1st Qu.	Median	Mean	3rd Qu.	Max.
89	0	0.453522	0.819515	0.67489	0.900683	0.96941
58	0	0.432322	0.702012	0.563339	0.787129	0.925562
33	0	0.4012	0.650744	0.564809	0.801192	0.97592
21	0	0.380579	0.690895	0.575292	0.820829	0.955625
4	0	0.332859	0.661262	0.561216	0.855532	0.956883
42	0	0.320526	0.639634	0.545799	0.830309	0.956893

## Sheet: Table S2
Table S2. Summary of I2 in scenerio(b)
	Min.	1st Qu.	Median	Mean	3rd Qu.	Max.
17	0	0	0.565585	0.43068	0.720423	0.895216
74	0	0	0.47934	0.388164	0.641797	0.784432
7	0	0.012865	0.478411	0.367569	0.628071	0.761734
40	0	0	0.477813	0.403152	0.649762	0.931719
83	0	0	0.474258	0.384202	0.590872	0.866203
52	0	0	0.40333	0.39075	0.72986	0.891049

## Sheet: Table S3
Table S3. Summary of I2 in scenerio(c)
Simulation ID	Min.	1st Qu.	Median	Mean	3rd Qu.	Max.
59	0	0	0.635988	0.429787	0.724334	0.843348
12	0	0	0.445553	0.361254	0.589048	0.829713
17	0	0.071398	0.407077	0.36037	0.615388	0.828717
49	0	0	0.379037	0.362842	0.665565	0.872834
22	0	0	0.303289	0.290206	0.500314	0.815725
80	0	0	0.27057	0.301923	0.546051	0.868319

## Sheet: Table S4
Table S5. Datasets
Type	Trait	Name	PubmedID	Journal	African	European	EastAsian	HispanicsLatinos	SouthAsian	TransEthnic
Blood cells	Mean corpuscular hemoglobin	MCH	32888493	Cell	http://ftp.ebi.ac.uk/pub/databases/gwas/summary_statistics/GCST90002001-GCST90003000/GCST90002321	http://ftp.ebi.ac.uk/pub/databases/gwas/summary_statistics/GCST90002001-GCST90003000/GCST90002322	http://ftp.ebi.ac.uk/pub/databases/gwas/summary_statistics/GCST90002001-GCST90003000/GCST90002323	http://ftp.ebi.ac.uk/pub/databases/gwas/summary_statistics/GCST90002001-GCST90003000/GCST90002324	http://ftp.ebi.ac.uk/pub/databases/gwas/summary_statistics/GCST90002001-GCST90003000/GCST90002325	http://ftp.ebi.ac.uk/pub/databases/gwas/summary_statistics/GCST90002001-GCST90003000/GCST90002326
	Mean corpuscular hemoglobin concentration	MCHC			http://ftp.ebi.ac.uk/pub/databases/gwas/summary_statistics/GCST90002001-GCST90003000/GCST90002327	http://ftp.ebi.ac.uk/pub/databases/gwas/summary_statistics/GCST90002001-GCST90003000/GCST90002328	http://ftp.ebi.ac.uk/pub/databases/gwas/summary_statistics/GCST90002001-GCST90003000/GCST90002329	http://ftp.ebi.ac.uk/pub/databases/gwas/summary_statistics/GCST90002001-GCST90003000/GCST90002330	http://ftp.ebi.ac.uk/pub/databases/gwas/summary_statistics/GCST90002001-GCST90003000/GCST90002331	http://ftp.ebi.ac.uk/pub/databases/gwas/summary_statistics/GCST90002001-GCST90003000/GCST90002332
	Mean corpuscular volume	MCV			http://ftp.ebi.ac.uk/pub/databases/gwas/summary_statistics/GCST90002001-GCST90003000/GCST90002333	http://ftp.ebi.ac.uk/pub/databases/gwas/summary_statistics/GCST90002001-GCST90003000/GCST90002334	http://ftp.ebi.ac.uk/pub/databases/gwas/summary_statistics/GCST90002001-GCST90003000/GCST90002335	http://ftp.ebi.ac.uk/pub/databases/gwas/summary_statistics/GCST90002001-GCST90003000/GCST90002336	http://ftp.ebi.ac.uk/pub/databases/gwas/summary_statistics/GCST90002001-GCST90003000/GCST90002337	http://ftp.ebi.ac.uk/pub/databases/gwas/summary_statistics/GCST90002001-GCST90003000/GCST90002338
	Monocyte count	Mono			http://ftp.ebi.ac.uk/pub/databases/gwas/summary_statistics/GCST90002001-GCST90003000/GCST90002339	http://ftp.ebi.ac.uk/pub/databases/gwas/summary_statistics/GCST90002001-GCST90003000/GCST90002340	http://ftp.ebi.ac.uk/pub/databases/gwas/summary_statistics/GCST90002001-GCST90003000/GCST90002341	http://ftp.ebi.ac.uk/pub/databases/gwas/summary_statistics/GCST90002001-GCST90003000/GCST90002342	http://ftp.ebi.ac.uk/pub/databases/gwas/summary_statistics/GCST90002001-GCST90003000/GCST90002343	http://ftp.ebi.ac.uk/pub/databases/gwas/summary_statistics/GCST90002001-GCST90003000/GCST90002344
	Basophil count	Baso			http://ftp.ebi.ac.uk/pub/databases/gwas/summary_statistics/GCST90002001-GCST90003000/GCST90002291	http://ftp.ebi.ac.uk/pub/databases/gwas/summary_statistics/GCST90002001-GCST90003000/GCST90002292	http://ftp.ebi.ac.uk/pub/databases/gwas/summary_statistics/GCST90002001-GCST90003000/GCST90002293	http://ftp.ebi.ac.uk/pub/databases/gwas/summary_statistics/GCST90002001-GCST90003000/GCST90002294	http://ftp.ebi.ac.uk/pub/databases/gwas/summary_statistics/GCST90002001-GCST90003000/GCST90002295	http://ftp.ebi.ac.uk/pub/databases/gwas/summary_statistics/GCST90002001-GCST90003000/GCST90002296
	Neutrophil count	Neutro			http://ftp.ebi.ac.uk/pub/databases/gwas/summary_statistics/GCST90002001-GCST90003000/GCST90002350	http://ftp.ebi.ac.uk/pub/databases/gwas/summary_statistics/GCST90002001-GCST90003000/GCST90002351	http://ftp.ebi.ac.uk/pub/databases/gwas/summary_statistics/GCST90002001-GCST90003000/GCST90002352	http://ftp.ebi.ac.uk/pub/databases/gwas/summary_statistics/GCST90002001-GCST90003000/GCST90002353	http://ftp.ebi.ac.uk/pub/databases/gwas/summary_statistics/GCST90002001-GCST90003000/GCST90002354	http://ftp.ebi.ac.uk/pub/databases/gwas/summary_statistics/GCST90002001-GCST90003000/GCST90002355
	Platelet count	PLT			http://ftp.ebi.ac.uk/pub/databases/gwas/summary_statistics/GCST90002001-GCST90003000/GCST90002356	http://ftp.ebi.ac.uk/pub/databases/gwas/summary_statistics/GCST90002001-GCST90003000/GCST90002357	http://ftp.ebi.ac.uk/pub/databases/gwas/summary_statistics/GCST90002001-GCST90003000/GCST90002358	http://ftp.ebi.ac.uk/pub/databases/gwas/summary_statistics/GCST90002001-GCST90003000/GCST90002359	http://ftp.ebi.ac.uk/pub/databases/gwas/summary_statistics/GCST90002001-GCST90003000/GCST90002360	http://ftp.ebi.ac.uk/pub/databases/gwas/summary_statistics/GCST90002001-GCST90003000/GCST90002361
	Eosinophil counts	Eosin			http://ftp.ebi.ac.uk/pub/databases/gwas/summary_statistics/GCST90002001-GCST90003000/GCST90002297	http://ftp.ebi.ac.uk/pub/databases/gwas/summary_statistics/GCST90002001-GCST90003000/GCST90002298	http://ftp.ebi.ac.uk/pub/databases/gwas/summary_statistics/GCST90002001-GCST90003000/GCST90002299	http://ftp.ebi.ac.uk/pub/databases/gwas/summary_statistics/GCST90002001-GCST90003000/GCST90002300	http://ftp.ebi.ac.uk/pub/databases/gwas/summary_statistics/GCST90002001-GCST90003000/GCST90002301	http://ftp.ebi.ac.uk/pub/databases/gwas/summary_statistics/GCST90002001-GCST90003000/GCST90002302
	Hematocrit	HCT			http://ftp.ebi.ac.uk/pub/databases/gwas/summary_statistics/GCST90002001-GCST90003000/GCST90002303	http://ftp.ebi.ac.uk/pub/databases/gwas/summary_statistics/GCST90002001-GCST90003000/GCST90002304	http://ftp.ebi.ac.uk/pub/databases/gwas/summary_statistics/GCST90002001-GCST90003000/GCST90002305	http://ftp.ebi.ac.uk/pub/databases/gwas/summary_statistics/GCST90002001-GCST90003000/GCST90002306	http://ftp.ebi.ac.uk/pub/databases/gwas/summary_statistics/GCST90002001-GCST90003000/GCST90002307	http://ftp.ebi.ac.uk/pub/databases/gwas/summary_statistics/GCST90002001-GCST90003000/GCST90002308
	Hemoglobin concentration	HGB			http://ftp.ebi.ac.uk/pub/databases/gwas/summary_statistics/GCST90002001-GCST90003000/GCST90002309	http://ftp.ebi.ac.uk/pub/databases/gwas/summary_statistics/GCST90002001-GCST90003000/GCST90002310	http://ftp.ebi.ac.uk/pub/databases/gwas/summary_statistics/GCST90002001-GCST90003000/GCST90002311	http://ftp.ebi.ac.uk/pub/databases/gwas/summary_statistics/GCST90002001-GCST90003000/GCST90002312	http://ftp.ebi.ac.uk/pub/databases/gwas/summary_statistics/GCST90002001-GCST90003000/GCST90002313	http://ftp.ebi.ac.uk/pub/databases/gwas/summary_statistics/GCST90002001-GCST90003000/GCST90002314
	White blood cell count	WBC			http://ftp.ebi.ac.uk/pub/databases/gwas/summary_statistics/GCST90002001-GCST90003000/GCST90002373	http://ftp.ebi.ac.uk/pub/databases/gwas/summary_statistics/GCST90002001-GCST90003000/GCST90002374	http://ftp.ebi.ac.uk/pub/databases/gwas/summary_statistics/GCST90002001-GCST90003000/GCST90002375	http://ftp.ebi.ac.uk/pub/databases/gwas/summary_statistics/GCST90002001-GCST90003000/GCST90002376	http://ftp.ebi.ac.uk/pub/databases/gwas/summary_statistics/GCST90002001-GCST90003000/GCST90002377	http://ftp.ebi.ac.uk/pub/databases/gwas/summary_statistics/GCST90002001-GCST90003000/GCST90002378
Lung function	forced expiratory volume	FEV	36914875	Nature genetics	http://ftp.ebi.ac.uk/pub/databases/gwas/summary_statistics/GCST90292001-GCST90293000/GCST90292621	http://ftp.ebi.ac.uk/pub/databases/gwas/summary_statistics/GCST90292001-GCST90293000/GCST90292609	http://ftp.ebi.ac.uk/pub/databases/gwas/summary_statistics/GCST90292001-GCST90293000/GCST90292629	http://ftp.ebi.ac.uk/pub/databases/gwas/summary_statistics/GCST90292001-GCST90293000/GCST90292633	http://ftp.ebi.ac.uk/pub/databases/gwas/summary_statistics/GCST90292001-GCST90293000/GCST90292625	http://ftp.ebi.ac.uk/pub/databases/gwas/summary_statistics/GCST90244001-GCST90245000/GCST90244092
	vital capacity	FVC			http://ftp.ebi.ac.uk/pub/databases/gwas/summary_statistics/GCST90292001-GCST90293000/GCST90292622	http://ftp.ebi.ac.uk/pub/databases/gwas/summary_statistics/GCST90292001-GCST90293000/GCST90292610	http://ftp.ebi.ac.uk/pub/databases/gwas/summary_statistics/GCST90292001-GCST90293000/GCST90292630	http://ftp.ebi.ac.uk/pub/databases/gwas/summary_statistics/GCST90292001-GCST90293000/GCST90292634	http://ftp.ebi.ac.uk/pub/databases/gwas/summary_statistics/GCST90292001-GCST90293000/GCST90292626	http://ftp.ebi.ac.uk/pub/databases/gwas/summary_statistics/GCST90244001-GCST90245000/GCST90244093
	FEV/FVC ratio	FEV_FVCC			http://ftp.ebi.ac.uk/pub/databases/gwas/summary_statistics/GCST90292001-GCST90293000/GCST90292623	http://ftp.ebi.ac.uk/pub/databases/gwas/summary_statistics/GCST90292001-GCST90293000/GCST90292611	http://ftp.ebi.ac.uk/pub/databases/gwas/summary_statistics/GCST90292001-GCST90293000/GCST90292631	http://ftp.ebi.ac.uk/pub/databases/gwas/summary_statistics/GCST90292001-GCST90293000/GCST90292635	http://ftp.ebi.ac.uk/pub/databases/gwas/summary_statistics/GCST90292001-GCST90293000/GCST90292627	http://ftp.ebi.ac.uk/pub/databases/gwas/summary_statistics/GCST90244001-GCST90245000/GCST90244094
	peak expiratory flow	PEF			http://ftp.ebi.ac.uk/pub/databases/gwas/summary_statistics/GCST90292001-GCST90293000/GCST90292624	http://ftp.ebi.ac.uk/pub/databases/gwas/summary_statistics/GCST90292001-GCST90293000/GCST90292612	http://ftp.ebi.ac.uk/pub/databases/gwas/summary_statistics/GCST90292001-GCST90293000/GCST90292632	http://ftp.ebi.ac.uk/pub/databases/gwas/summary_statistics/GCST90292001-GCST90293000/GCST90292636	http://ftp.ebi.ac.uk/pub/databases/gwas/summary_statistics/GCST90292001-GCST90293000/GCST90292628	http://ftp.ebi.ac.uk/pub/databases/gwas/summary_statistics/GCST90244001-GCST90245000/GCST90244095

## Sheet: Table S5
Table S5. Setting of λ in application
	FEV	FVC	FEV/FVC	PEF
African	0.05	0.1	0.06	0.05
European	3	3	3	1.3
East Asian	0.06	0.1	0.04	0.13
Hispanics Latinos	0.25	0.25	0.35	0.32
South Asian	0.1	0.1	0.11	0.12

## Sheet: Table S6
Table S6. Results in application (mrMeta before meta)
ethnic	mrmethod	outcome	exposure	beta	se	pvalue
SouthAsian	MVMR-Median	PEF	HCT	-4.31893	0.470366	4.22866e-20
SouthAsian	MVMR-Median	PEF	HGB	4.26598	0.476266	3.33237e-19
SouthAsian	MVMR-Median	FEV_FVCC	MCH	-3.67076	0.491051	7.70274e-14
European	MVMR-Lasso	FEV_FVCC	Eosin	-9.84114	1.36781	6.25411e-13
SouthAsian	MVMR-Median	FEV_FVCC	MCV	3.04189	0.440852	5.19927e-12
European	MVMR-Median	FEV_FVCC	Eosin	-10.3598	1.80242	9.04486e-09
SouthAsian	MVMR-Median	FEV_FVCC	HCT	-2.47131	0.48332	3.1673e-07
SouthAsian	MVMR-Median	FEV_FVCC	HGB	2.32398	0.484329	1.59987e-06
European	MVMR-Lasso	FEV	Eosin	-6.3241	1.35161	2.88378e-06
European	MVMR-IVW	FEV_FVCC	Eosin	-10.1159	2.20218	4.357e-06
European	MVMR-Egger	FEV_FVCC	Eosin	-10.1245	2.20476	4.38755e-06
African	MVMR-Median	FVC	HGB	0.85615	0.186762	4.55791e-06
SouthAsian	MVMR-Median	FEV	HGB	2.27883	0.499966	5.16502e-06
European	MVMR-Median	FVC	MCV	18.8732	4.18378	6.45126e-06
European	MVMR-Median	FEV	MCHC	13.6941	3.04069	6.68032e-06
SouthAsian	MVMR-Median	FEV	HCT	-2.236	0.497166	6.876e-06
European	MVMR-Median	FVC	MCH	-20.3405	4.61362	1.03946e-05
European	MVMR-Median	FVC	WBC	-17.7268	4.02415	1.05732e-05
EastAsian	MVMR-Median	FEV	HGB	-2.35618	0.567024	3.24796e-05
HispanicsLatinos	MVMR-Median	FEV_FVCC	HGB	-3.49789	0.895748	9.42292e-05
European	MVMR-Median	FVC	MCHC	11.7424	3.01023	9.58642e-05
European	MVMR-Median	PEF	HCT	17.2891	4.49935	0.000121755
African	MVMR-Median	FVC	HCT	-0.698758	0.185472	0.000164912
European	MVMR-Lasso	PEF	Eosin	-4.88376	1.31613	0.000206692
EastAsian	MVMR-Median	FEV	HCT	1.98638	0.545916	0.000274102
European	MVMR-Median	FEV	MCV	15.4176	4.23958	0.000276273
European	MVMR-Lasso	FEV_FVCC	WBC	15.1863	4.23978	0.000341137
European	MVMR-Median	FVC	Neutro	13.1329	3.67529	0.000352506
European	MVMR-Median	FEV	HCT	16.7512	4.72251	0.000389497
African	MVMR-Median	FEV_FVCC	WBC	0.522889	0.148261	0.000420605
European	MVMR-Median	FEV	MCH	-16.1806	4.67448	0.000537237
European	MVMR-Lasso	FEV_FVCC	Neutro	-13.2486	3.86814	0.00061465
SouthAsian	MVMR-Median	FVC	HGB	1.7156	0.526843	0.00112847
European	MVMR-Median	FEV_FVCC	Neutro	-11.9821	3.68362	0.00114272
European	MVMR-Median	PEF	HGB	-14.5168	4.52317	0.00132999
European	MVMR-Median	FEV_FVCC	WBC	12.5724	4.01318	0.00173162
African	MVMR-Lasso	FEV_FVCC	PLT	-0.206247	0.0660386	0.00178938
African	MVMR-Median	PEF	MCHC	-0.360375	0.116268	0.00193835
EastAsian	MVMR-Median	FVC	HGB	-1.86212	0.602153	0.00198519
European	MVMR-Lasso	FEV	MCHC	20.0101	6.57298	0.0023323
European	MVMR-Median	FEV	HGB	-14.1648	4.76333	0.0029422
EastAsian	MVMR-Median	FVC	HCT	1.72938	0.581994	0.00296378
SouthAsian	MVMR-Median	FVC	HCT	-1.51624	0.520007	0.00354777
SouthAsian	MVMR-Median	FEV_FVCC	WBC	1.3826	0.474312	0.0035575
HispanicsLatinos	MVMR-Median	FEV_FVCC	HCT	2.88514	0.99032	0.00357588
European	MVMR-Median	FEV_FVCC	MCH	-13.2877	4.61892	0.00401722
African	MVMR-Median	FEV_FVCC	Neutro	-0.367686	0.12811	0.0041036
SouthAsian	MVMR-Median	PEF	MCHC	-1.18143	0.416396	0.00455017
African	MVMR-Median	FEV	WBC	0.446606	0.157598	0.00459954
African	MVMR-IVW	FEV_FVCC	PLT	-0.194281	0.0688333	0.00476534
African	MVMR-Egger	FEV_FVCC	PLT	-0.192981	0.0689647	0.00513795
HispanicsLatinos	MVMR-Egger	FEV_FVCC	PLT	-0.64153	0.241244	0.00783135
European	MVMR-Median	FEV_FVCC	MCV	11.1083	4.20404	0.00823448
African	MVMR-Median	FEV_FVCC	MCHC	-0.300957	0.116278	0.00964656
African	MVMR-Lasso	FEV_FVCC	Mono	-0.22876	0.0884061	0.00966468
African	MVMR-Lasso	FEV	WBC	0.589807	0.22946	0.0101576
HispanicsLatinos	MVMR-IVW	FEV_FVCC	PLT	-0.564009	0.221511	0.0108906
HispanicsLatinos	MVMR-Lasso	FEV_FVCC	PLT	-0.564009	0.221511	0.0108906
African	MVMR-Lasso	FEV	Neutro	-0.475965	0.189308	0.0119288
EastAsian	MVMR-Median	FEV	MCHC	0.870168	0.347913	0.0123805
European	MVMR-Lasso	FVC	WBC	-10.3099	4.14113	0.0127873
HispanicsLatinos	MVMR-Median	PEF	MCH	-1.53209	0.623206	0.0139559
SouthAsian	MVMR-Median	FEV_FVCC	Neutro	-1.00133	0.409378	0.0144462
African	MVMR-Median	PEF	MCH	0.349533	0.143316	0.0147324
HispanicsLatinos	MVMR-Median	FEV_FVCC	Neutro	-1.85814	0.763134	0.0148967
African	MVMR-Median	FEV	Neutro	-0.324846	0.134293	0.0155662
SouthAsian	MVMR-Lasso	PEF	Mono	-0.415755	0.173411	0.0165065
African	MVMR-Median	FEV_FVCC	MCH	0.336483	0.1421	0.0178877
European	MVMR-Median	FEV	Eosin	-4.24727	1.80167	0.0184031
European	MVMR-IVW	FEV_FVCC	Neutro	-14.9014	6.32289	0.0184363
European	MVMR-Egger	FEV_FVCC	Neutro	-14.8884	6.33538	0.0187713
European	MVMR-IVW	FEV_FVCC	WBC	16.134	6.92772	0.0198641
European	MVMR-Egger	FEV_FVCC	WBC	16.1067	6.93478	0.0202005
SouthAsian	MVMR-Lasso	FVC	Neutro	1.2528	0.540366	0.020426
European	MVMR-Median	PEF	Eosin	-4.02206	1.74165	0.0209246
HispanicsLatinos	MVMR-Median	PEF	MCV	1.20765	0.523448	0.0210489
EastAsian	MVMR-Median	FEV_FVCC	MCV	0.909914	0.403249	0.024042
African	MVMR-Median	FEV	HCT	-0.395395	0.175723	0.0244421
African	MVMR-Egger	FEV_FVCC	Mono	-0.20803	0.0924691	0.0244664
EastAsian	MVMR-Median	FEV_FVCC	MCH	-1.0173	0.45295	0.0247079
African	MVMR-IVW	FEV_FVCC	Mono	-0.204412	0.0921028	0.0264601
European	MVMR-Lasso	FEV	MCV	21.292	9.63854	0.0271713
European	MVMR-Median	FEV	WBC	-8.98659	4.07806	0.0275495
European	MVMR-IVW	FEV	Eosin	-4.46842	2.09642	0.033052
SouthAsian	MVMR-Lasso	FEV	Mono	-0.333313	0.156973	0.0337221
European	MVMR-Lasso	FEV	MCH	-23.014	10.839	0.0337333
European	MVMR-Lasso	FVC	MCHC	13.5934	6.42306	0.0343157
SouthAsian	MVMR-Median	FEV_FVCC	Mono	-0.444951	0.21094	0.034912
SouthAsian	MVMR-Median	FVC	MCHC	-0.949606	0.453838	0.0364036
HispanicsLatinos	MVMR-Median	FVC	MCH	1.17488	0.566474	0.0380771
African	MVMR-Median	FEV_FVCC	HCT	-0.338868	0.163959	0.0387539
HispanicsLatinos	MVMR-Median	FEV_FVCC	WBC	1.8916	0.916891	0.0391067
HispanicsLatinos	MVMR-IVW	PEF	PLT	-0.444482	0.216969	0.0405018
HispanicsLatinos	MVMR-Lasso	PEF	PLT	-0.444482	0.216969	0.0405018
European	MVMR-Egger	FEV	Eosin	-4.28701	2.0972	0.0409378
African	MVMR-Median	PEF	Baso	-0.255044	0.126124	0.0431588
SouthAsian	MVMR-Lasso	FVC	WBC	-1.38409	0.68818	0.0443015
African	MVMR-IVW	FVC	HCT	-1.41241	0.70326	0.0446029
European	MVMR-Egger	FVC	WBC	-12.9102	6.44371	0.0451198
African	MVMR-IVW	FVC	HGB	1.48319	0.742338	0.0457175
African	MVMR-Egger	FVC	HCT	-1.41175	0.713123	0.0477411
African	MVMR-Egger	FVC	HGB	1.48251	0.752122	0.0487126
SouthAsian	MVMR-Lasso	FEV_FVCC	Mono	-0.361651	0.185864	0.0516811
European	MVMR-Lasso	FEV	WBC	-8.22575	4.2304	0.0518424
SouthAsian	MVMR-Median	FEV	MCHC	-0.845492	0.435197	0.0520426
African	MVMR-Egger	FEV	HCT	-1.33078	0.685442	0.0521992
European	MVMR-Lasso	FVC	Neutro	7.31641	3.77139	0.0523825
African	MVMR-IVW	FEV	HCT	-1.3078	0.676019	0.0530451
HispanicsLatinos	MVMR-Egger	PEF	PLT	-0.460735	0.24003	0.0549221
African	MVMR-Lasso	FVC	Neutro	-0.367936	0.191728	0.0549775
EastAsian	MVMR-Median	FEV_FVCC	MCHC	0.58797	0.306987	0.0554553
African	MVMR-Lasso	FVC	Baso	-0.210935	0.110905	0.0571789
SouthAsian	MVMR-IVW	FEV_FVCC	Mono	-0.353709	0.188386	0.0604392
HispanicsLatinos	MVMR-IVW	FVC	Baso	0.928523	0.497902	0.0621996
HispanicsLatinos	MVMR-Lasso	FVC	Baso	0.928523	0.497902	0.0621996
African	MVMR-Egger	FEV	HGB	1.34769	0.722925	0.0622917
SouthAsian	MVMR-Egger	FEV_FVCC	Mono	-0.358935	0.193077	0.0630234
European	MVMR-IVW	FVC	WBC	-11.9668	6.4437	0.0632932
African	MVMR-IVW	FEV	HGB	1.32429	0.713582	0.0634777
European	MVMR-Median	FEV	Neutro	6.96768	3.78348	0.0655323
HispanicsLatinos	MVMR-Egger	FEV_FVCC	Mono	0.784181	0.426592	0.0660262
European	MVMR-Median	FEV_FVCC	HGB	8.55148	4.68163	0.0677598
SouthAsian	MVMR-Lasso	PEF	HCT	-3.84558	2.11432	0.0689375
European	MVMR-Lasso	FVC	MCV	17.2901	9.517	0.0692547
African	MVMR-IVW	FVC	Eosin	-0.204673	0.113859	0.0722402
African	MVMR-Egger	FVC	Eosin	-0.204693	0.114115	0.0728542
SouthAsian	MVMR-IVW	FEV	Mono	-0.330859	0.184763	0.0733383
African	MVMR-Lasso	FVC	WBC	0.416107	0.233243	0.074423
SouthAsian	MVMR-Lasso	PEF	HGB	3.97722	2.23457	0.0750984
SouthAsian	MVMR-Median	PEF	MCH	-0.830885	0.469081	0.0765102
EastAsian	MVMR-Lasso	FVC	Mono	0.361677	0.204697	0.0772465
SouthAsian	MVMR-Lasso	PEF	MCHC	-1.45568	0.825795	0.0779405
HispanicsLatinos	MVMR-IVW	FEV	Mono	0.636965	0.361713	0.0782442
HispanicsLatinos	MVMR-Lasso	FEV	Mono	0.636965	0.361713	0.0782442
SouthAsian	MVMR-Egger	FEV	Mono	-0.311065	0.176806	0.0785166
HispanicsLatinos	MVMR-Median	FEV_FVCC	PLT	-0.717934	0.408072	0.0785213
African	MVMR-IVW	FEV	MCHC	-0.478336	0.273064	0.0798194
African	MVMR-Egger	FEV	MCHC	-0.478121	0.273535	0.0804759
European	MVMR-Median	PEF	WBC	-6.83596	3.93165	0.0820873
African	MVMR-Lasso	FEV	Eosin	-0.172977	0.100185	0.0842433
HispanicsLatinos	MVMR-Median	FVC	MCHC	-0.837222	0.484997	0.0843039
African	MVMR-Lasso	FVC	Eosin	-0.174614	0.101209	0.0844768
EastAsian	MVMR-Median	FVC	MCV	-0.830069	0.481795	0.0849125
African	MVMR-Median	FVC	MCHC	-0.213547	0.124046	0.085159
African	MVMR-Median	FEV_FVCC	Mono	-0.206376	0.120171	0.0859144
African	MVMR-Lasso	FEV	MCHC	-0.406759	0.239366	0.0892592
African	MVMR-Median	PEF	HCT	-0.283822	0.169273	0.0935995
European	MVMR-Lasso	FEV	HCT	25.9294	15.5038	0.0944351
SouthAsian	MVMR-Median	PEF	MCV	0.711519	0.426799	0.0954937
HispanicsLatinos	MVMR-IVW	FEV	Baso	0.830133	0.499661	0.0966344
HispanicsLatinos	MVMR-Lasso	FEV	Baso	0.830133	0.499661	0.0966344
HispanicsLatinos	MVMR-Median	FVC	Baso	0.934427	0.563608	0.0973303
SouthAsian	MVMR-Median	FEV	Mono	-0.353308	0.21469	0.0998331
EastAsian	MVMR-Median	FEV	Mono	0.429617	0.261183	0.0999931
HispanicsLatinos	MVMR-IVW	FEV_FVCC	Mono	0.606939	0.36924	0.100227
HispanicsLatinos	MVMR-Lasso	FEV_FVCC	Mono	0.606939	0.36924	0.100227
HispanicsLatinos	MVMR-Median	FEV	WBC	-1.41716	0.86223	0.100258
European	MVMR-Lasso	FVC	MCH	-17.39	10.6989	0.104078
HispanicsLatinos	MVMR-Egger	FVC	Baso	0.829125	0.514615	0.107145
European	MVMR-IVW	PEF	Eosin	-3.02159	1.88644	0.109213
African	MVMR-Median	FVC	PLT	0.159782	0.0997717	0.109271
HispanicsLatinos	MVMR-Median	PEF	Neutro	-1.24418	0.779503	0.110462
African	MVMR-IVW	FVC	MCHC	-0.450961	0.284067	0.112396
African	MVMR-Egger	FVC	MCHC	-0.450967	0.284581	0.113042
EastAsian	MVMR-Lasso	PEF	Baso	0.251744	0.158864	0.113045
HispanicsLatinos	MVMR-Median	FEV	Mono	0.841362	0.531516	0.113433
African	MVMR-Egger	FEV	WBC	0.406172	0.25749	0.114697
African	MVMR-Lasso	FVC	MCHC	-0.381008	0.241564	0.114736
SouthAsian	MVMR-Median	FEV_FVCC	MCHC	0.664225	0.421411	0.114981
African	MVMR-IVW	FEV	WBC	0.394049	0.250903	0.116293
SouthAsian	MVMR-Egger	FEV	MCV	2.14629	1.36834	0.116755
African	MVMR-Median	FVC	Baso	-0.215046	0.138068	0.119342
SouthAsian	MVMR-Egger	FVC	MCV	2.3387	1.50721	0.12074
African	MVMR-Median	FEV_FVCC	HGB	0.258576	0.167533	0.122725
HispanicsLatinos	MVMR-Egger	FEV	Baso	0.793857	0.516422	0.124238
European	MVMR-Egger	PEF	Eosin	-2.88344	1.88821	0.126743
EastAsian	MVMR-Egger	FVC	Mono	0.369752	0.242861	0.127888
EastAsian	MVMR-IVW	FVC	Mono	0.368473	0.242238	0.12823
African	MVMR-IVW	FVC	WBC	0.396507	0.261013	0.128735
European	MVMR-Median	FEV_FVCC	HCT	-7.08552	4.67212	0.129379
African	MVMR-Lasso	PEF	Mono	-0.136601	0.0902346	0.130065
HispanicsLatinos	MVMR-Median	FVC	MCV	-0.712272	0.471997	0.131283
African	MVMR-Egger	FEV	Neutro	-0.318949	0.212267	0.132947
SouthAsian	MVMR-Egger	FEV	HGB	3.71841	2.49087	0.135486
African	MVMR-IVW	FEV	Neutro	-0.309344	0.207228	0.135498
European	MVMR-Egger	FVC	Neutro	8.77234	5.88675	0.136176
African	MVMR-IVW	FVC	Neutro	-0.320875	0.215579	0.136637
SouthAsian	MVMR-Egger	FVC	MCH	-2.83107	1.9117	0.138629
African	MVMR-Egger	FVC	WBC	0.396154	0.267888	0.139192
European	MVMR-Lasso	FEV	HGB	-22.986	15.5701	0.139866
African	MVMR-Median	FEV_FVCC	PLT	-0.133315	0.0909851	0.142856
SouthAsian	MVMR-Egger	FEV	HCT	-3.4532	2.36075	0.143535
SouthAsian	MVMR-Egger	FEV	MCH	-2.53236	1.73557	0.144538
African	MVMR-Egger	FVC	Neutro	-0.320596	0.22084	0.146582
European	MVMR-Lasso	PEF	HCT	21.6536	14.9191	0.146668
African	MVMR-Lasso	PEF	MCH	0.383758	0.264548	0.146886
African	MVMR-Lasso	FVC	PLT	0.102958	0.0710049	0.147054
African	MVMR-Lasso	FEV_FVCC	Eosin	0.136439	0.0941058	0.147101
African	MVMR-Lasso	FVC	MCV	-0.338717	0.234015	0.147781
HispanicsLatinos	MVMR-Median	FVC	WBC	-1.17378	0.821838	0.153222
EastAsian	MVMR-Median	FEV_FVCC	HGB	-0.729707	0.51253	0.154523
European	MVMR-Lasso	FEV	Neutro	5.48073	3.8589	0.155525
European	MVMR-Lasso	FEV_FVCC	Baso	-3.00251	2.12446	0.157567
SouthAsian	MVMR-Lasso	FEV_FVCC	Baso	0.674988	0.478318	0.158194
SouthAsian	MVMR-Egger	PEF	HCT	-3.02943	2.15529	0.15985
European	MVMR-Egger	FVC	MCH	-24.2743	17.3036	0.160661
HispanicsLatinos	MVMR-Egger	FEV	Mono	0.580836	0.414258	0.160882
SouthAsian	MVMR-Lasso	PEF	PLT	-0.177444	0.127027	0.162443
EastAsian	MVMR-IVW	FEV_FVCC	Neutro	0.419355	0.300475	0.162823
EastAsian	MVMR-Lasso	PEF	Eosin	-0.226654	0.162447	0.162942
EastAsian	MVMR-Egger	FEV_FVCC	Neutro	0.419631	0.300993	0.163271
SouthAsian	MVMR-Egger	FVC	HGB	3.80675	2.74415	0.165373
African	MVMR-Median	FEV	Baso	-0.185621	0.134073	0.166213
African	MVMR-IVW	PEF	Mono	-0.129124	0.0934126	0.16688
EastAsian	MVMR-Lasso	FVC	Eosin	0.245438	0.177857	0.167595
African	MVMR-Lasso	FVC	MCH	0.376418	0.274755	0.170683
SouthAsian	MVMR-Egger	FVC	HCT	-3.55476	2.6008	0.171689
HispanicsLatinos	MVMR-Median	FVC	PLT	0.515416	0.37824	0.172987
SouthAsian	MVMR-Egger	PEF	HGB	3.09066	2.27407	0.174118
SouthAsian	MVMR-Lasso	FEV_FVCC	Neutro	-0.787	0.582259	0.176493
European	MVMR-Median	FVC	HGB	6.33231	4.69323	0.177259
African	MVMR-Egger	PEF	Mono	-0.126082	0.0937993	0.178895
African	MVMR-IVW	FEV	PLT	-0.103846	0.0779754	0.182931
European	MVMR-Egger	FVC	MCV	20.362	15.3197	0.183803
HispanicsLatinos	MVMR-Median	FEV_FVCC	MCHC	0.696423	0.526551	0.185964
African	MVMR-Egger	FEV	PLT	-0.10325	0.0781579	0.186488
European	MVMR-Egger	FEV	MCH	-23.35	17.7138	0.187441
African	MVMR-Lasso	FEV	Baso	-0.143617	0.109606	0.190093
European	MVMR-Lasso	PEF	HGB	-19.4488	14.9885	0.194432
SouthAsian	MVMR-Egger	PEF	MCV	1.61921	1.24923	0.194921
SouthAsian	MVMR-Egger	PEF	MCH	-2.05187	1.5845	0.195332
EastAsian	MVMR-Median	FVC	MCH	0.698705	0.539729	0.195476
European	MVMR-IVW	FVC	Neutro	7.56139	5.88113	0.198546
European	MVMR-Lasso	FEV_FVCC	PLT	1.26688	0.988534	0.199992
SouthAsian	MVMR-Median	FEV	PLT	-0.222174	0.17359	0.200589
SouthAsian	MVMR-IVW	PEF	Mono	-0.217192	0.169786	0.200823
EastAsian	MVMR-Median	FEV	WBC	-0.556069	0.434795	0.200924
European	MVMR-Lasso	FEV_FVCC	MCH	-14.1945	11.1452	0.202807
European	MVMR-Lasso	PEF	MCHC	8.17716	6.4233	0.203001
SouthAsian	MVMR-Lasso	FEV_FVCC	MCHC	-0.955772	0.753923	0.204894
African	MVMR-Median	FVC	Eosin	-0.159316	0.125905	0.205739
EastAsian	MVMR-Lasso	FEV_FVCC	HGB	-1.41077	1.11786	0.20694
African	MVMR-Lasso	FEV	HGB	0.791772	0.629714	0.208626
SouthAsian	MVMR-Lasso	FEV	WBC	-0.902979	0.719539	0.2095
EastAsian	MVMR-Lasso	FEV_FVCC	Neutro	0.373777	0.298222	0.210078
African	MVMR-IVW	FEV	Eosin	-0.136485	0.109448	0.212386
African	MVMR-IVW	FVC	Baso	-0.158691	0.12755	0.213444
African	MVMR-Egger	FVC	Baso	-0.158638	0.128076	0.215482
African	MVMR-Egger	FEV	Eosin	-0.135774	0.109685	0.215772
HispanicsLatinos	MVMR-IVW	FVC	Eosin	-0.477495	0.388147	0.218626
HispanicsLatinos	MVMR-Lasso	FVC	Eosin	-0.477495	0.388147	0.218626
SouthAsian	MVMR-Egger	PEF	Mono	-0.19833	0.161422	0.219206
European	MVMR-Egger	FEV	MCV	19.0875	15.6829	0.223569
European	MVMR-IVW	FVC	MCV	18.3118	15.3143	0.231801
EastAsian	MVMR-Median	FVC	Mono	0.324947	0.272667	0.233364
EastAsian	MVMR-Lasso	FEV	Mono	0.232052	0.195095	0.23427
European	MVMR-Lasso	FEV	Baso	2.49477	2.10573	0.236115
African	MVMR-IVW	FEV_FVCC	MCH	0.31948	0.271232	0.238843
HispanicsLatinos	MVMR-Median	PEF	WBC	1.10202	0.937968	0.240033
African	MVMR-Lasso	FEV_FVCC	MCH	0.304817	0.260336	0.241655
European	MVMR-Lasso	FVC	Baso	2.41031	2.06054	0.242105
European	MVMR-Median	PEF	MCHC	3.5	2.9997	0.243299
SouthAsian	MVMR-Median	FVC	Neutro	0.505547	0.433602	0.243645
EastAsian	MVMR-Median	FVC	Neutro	-0.430266	0.37313	0.248859
EastAsian	MVMR-IVW	FEV_FVCC	HGB	-1.28439	1.12673	0.254319
HispanicsLatinos	MVMR-Egger	FVC	PLT	0.265699	0.233436	0.255034
SouthAsian	MVMR-Lasso	FVC	Mono	-0.175786	0.154459	0.255086
EastAsian	MVMR-Lasso	FEV_FVCC	Eosin	-0.169171	0.149832	0.258868
African	MVMR-Lasso	FEV	HCT	-0.673079	0.59871	0.260921
SouthAsian	MVMR-IVW	FVC	Mono	-0.228033	0.202926	0.26113
EastAsian	MVMR-Egger	FEV_FVCC	HGB	-1.28029	1.14214	0.262304
African	MVMR-Egger	PEF	MCH	0.330615	0.295512	0.263231
African	MVMR-Lasso	FVC	HGB	0.706116	0.635107	0.266221
European	MVMR-Lasso	PEF	Baso	2.28189	2.05485	0.266789
SouthAsian	MVMR-Lasso	FEV	Neutro	0.641704	0.578121	0.267007
African	MVMR-Lasso	PEF	MCHC	-0.258942	0.235069	0.270654
SouthAsian	MVMR-Median	PEF	PLT	-0.185238	0.168333	0.271147
SouthAsian	MVMR-IVW	FEV	PLT	-0.165052	0.150661	0.273288
European	MVMR-IVW	FEV	MCV	17.1654	15.674	0.27345
African	MVMR-IVW	PEF	Baso	-0.120154	0.10977	0.273692
European	MVMR-Lasso	FEV_FVCC	MCV	10.7991	9.90173	0.275435
SouthAsian	MVMR-Lasso	FEV_FVCC	Eosin	-0.304687	0.279368	0.275436
European	MVMR-IVW	FVC	MCH	-18.7357	17.2284	0.27682
HispanicsLatinos	MVMR-Median	FVC	Mono	0.555142	0.510828	0.277147
HispanicsLatinos	MVMR-Median	PEF	PLT	-0.449368	0.414625	0.278457
EastAsian	MVMR-Median	FEV_FVCC	HCT	0.528286	0.48769	0.278702
EastAsian	MVMR-Lasso	FEV	Eosin	-0.178521	0.164995	0.27926
EastAsian	MVMR-Median	FEV_FVCC	WBC	0.420389	0.388708	0.279473
EastAsian	MVMR-Lasso	FEV_FVCC	HCT	1.13844	1.0558	0.280913
EastAsian	MVMR-Lasso	FVC	PLT	0.128685	0.119378	0.281054
HispanicsLatinos	MVMR-Egger	FVC	WBC	-1.48816	1.38872	0.2839
SouthAsian	MVMR-Egger	FVC	Mono	-0.206641	0.194752	0.288669
African	MVMR-Egger	PEF	Baso	-0.116836	0.110183	0.288972
SouthAsian	MVMR-IVW	FEV	HGB	2.6783	2.5274	0.28928
SouthAsian	MVMR-Egger	FVC	Neutro	0.692186	0.660538	0.294679
African	MVMR-Median	PEF	HGB	0.179786	0.171843	0.295457
SouthAsian	MVMR-IVW	FEV	HCT	-2.49544	2.39976	0.298401
EastAsian	MVMR-Lasso	FEV_FVCC	MCHC	0.625196	0.603754	0.300429
European	MVMR-IVW	FEV	MCH	-18.2541	17.633	0.300564
African	MVMR-Median	PEF	MCV	-0.139137	0.134772	0.301891
EastAsian	MVMR-Lasso	PEF	Neutro	-0.326827	0.317327	0.303039
HispanicsLatinos	MVMR-IVW	PEF	Neutro	-1.02062	0.990967	0.303044
HispanicsLatinos	MVMR-Lasso	PEF	Neutro	-1.02062	0.990967	0.303044
African	MVMR-IVW	PEF	MCH	0.283213	0.275085	0.303223
HispanicsLatinos	MVMR-Median	FEV_FVCC	MCV	0.525895	0.51348	0.305752
HispanicsLatinos	MVMR-IVW	FVC	Mono	0.367951	0.360453	0.307349
HispanicsLatinos	MVMR-Lasso	FVC	Mono	0.367951	0.360453	0.307349
EastAsian	MVMR-Lasso	FEV	MCV	-0.7682	0.759867	0.312032
SouthAsian	MVMR-IVW	FVC	PLT	-0.166997	0.165464	0.312848
EastAsian	MVMR-IVW	FEV_FVCC	WBC	-0.373406	0.370763	0.313873
EastAsian	MVMR-Egger	FEV_FVCC	WBC	-0.373507	0.371124	0.314214
African	MVMR-Lasso	PEF	MCV	-0.222952	0.223323	0.318115
EastAsian	MVMR-IVW	FEV_FVCC	MCHC	0.60616	0.608807	0.319419
EastAsian	MVMR-Egger	FEV_FVCC	MCHC	0.605973	0.609413	0.32005
EastAsian	MVMR-Lasso	FEV_FVCC	WBC	-0.365192	0.367679	0.320595
African	MVMR-Median	FEV	MCH	0.148155	0.149323	0.321112
African	MVMR-Egger	FEV	Baso	-0.121368	0.123106	0.32419
EastAsian	MVMR-IVW	FEV_FVCC	Eosin	-0.148845	0.150991	0.324237
EastAsian	MVMR-Egger	FEV_FVCC	Eosin	-0.148925	0.151168	0.324545
EastAsian	MVMR-Lasso	FVC	Neutro	-0.331925	0.337249	0.325011
African	MVMR-Egger	PEF	MCHC	-0.239839	0.244826	0.327268
African	MVMR-IVW	PEF	MCHC	-0.239446	0.24447	0.327358
African	MVMR-IVW	FEV	Baso	-0.119557	0.122611	0.329515
African	MVMR-Median	FEV	HGB	0.173021	0.177468	0.329589
HispanicsLatinos	MVMR-Egger	FVC	Neutro	1.18269	1.21344	0.329728
African	MVMR-Median	FEV_FVCC	MCV	-0.12857	0.132061	0.330272
SouthAsian	MVMR-IVW	FVC	HGB	2.68532	2.77632	0.333434
SouthAsian	MVMR-Lasso	FEV	Baso	0.468353	0.485751	0.334954
HispanicsLatinos	MVMR-Median	FVC	HGB	0.804863	0.83565	0.335468
HispanicsLatinos	MVMR-Median	PEF	HCT	-0.988455	1.02964	0.337053
SouthAsian	MVMR-IVW	FEV	MCV	1.27299	1.32636	0.337178
HispanicsLatinos	MVMR-Median	FEV_FVCC	Mono	0.530349	0.552699	0.337275
SouthAsian	MVMR-IVW	FVC	MCV	1.39727	1.45673	0.337467
SouthAsian	MVMR-IVW	PEF	HCT	-2.1145	2.20521	0.337625
African	MVMR-Median	PEF	PLT	-0.0901088	0.0940628	0.338081
HispanicsLatinos	MVMR-Egger	FVC	MCV	-0.666283	0.69575	0.338241
SouthAsian	MVMR-IVW	FVC	HCT	-2.52216	2.63612	0.338684
EastAsian	MVMR-IVW	FVC	PLT	0.137141	0.143782	0.340179
EastAsian	MVMR-IVW	FEV_FVCC	HCT	1.00853	1.06409	0.343237
EastAsian	MVMR-Egger	FVC	PLT	0.136021	0.144435	0.346324
EastAsian	MVMR-Egger	FEV_FVCC	HCT	1.00477	1.07788	0.351249
EastAsian	MVMR-IVW	FEV	HGB	-1.32898	1.43211	0.353414
HispanicsLatinos	MVMR-Egger	PEF	Neutro	-1.1508	1.24753	0.356289
African	MVMR-Median	FEV	Mono	-0.103514	0.112758	0.358611
HispanicsLatinos	MVMR-IVW	FVC	PLT	0.198472	0.216222	0.358668
HispanicsLatinos	MVMR-Lasso	FVC	PLT	0.198472	0.216222	0.358668
EastAsian	MVMR-Lasso	FEV	Neutro	-0.294106	0.320667	0.359054
European	MVMR-Median	PEF	MCV	-3.70388	4.04004	0.359252
EastAsian	MVMR-Egger	FEV	HGB	-1.33039	1.45168	0.359434
SouthAsian	MVMR-Egger	FEV_FVCC	Neutro	-0.59955	0.654785	0.359854
HispanicsLatinos	MVMR-Median	FEV_FVCC	Baso	-0.561739	0.614332	0.360512
African	MVMR-Lasso	FEV	MCH	0.247218	0.27115	0.361907
African	MVMR-Lasso	PEF	PLT	-0.0609849	0.0669448	0.36231
European	MVMR-IVW	PEF	HCT	19.8797	21.9084	0.364196
EastAsian	MVMR-IVW	FEV	Mono	0.207012	0.228383	0.364711
SouthAsian	MVMR-Egger	FVC	Eosin	0.293069	0.323971	0.36567
EastAsian	MVMR-Egger	FEV	Mono	0.207093	0.228972	0.365758
European	MVMR-Median	FEV_FVCC	Mono	1.45574	1.61165	0.366389
African	MVMR-Egger	FEV_FVCC	MCH	0.263099	0.291325	0.366467
SouthAsian	MVMR-IVW	PEF	HGB	2.09707	2.32249	0.366557
African	MVMR-Egger	FEV_FVCC	WBC	0.20503	0.227199	0.366832
SouthAsian	MVMR-Lasso	FEV_FVCC	MCH	1.2757	1.41464	0.36717
HispanicsLatinos	MVMR-Egger	FEV_FVCC	Neutro	-1.12734	1.25374	0.368552
SouthAsian	MVMR-IVW	PEF	PLT	-0.124442	0.138446	0.368734
HispanicsLatinos	MVMR-IVW	FEV	Eosin	-0.349273	0.389533	0.369908
HispanicsLatinos	MVMR-Lasso	FEV	Eosin	-0.349273	0.389533	0.369908
African	MVMR-Lasso	FVC	Mono	0.0833476	0.0929729	0.370001
European	MVMR-Egger	FEV	MCHC	9.46149	10.5701	0.370726
European	MVMR-IVW	FVC	PLT	-1.38271	1.54532	0.37091
SouthAsian	MVMR-Egger	FVC	Baso	-0.493737	0.554614	0.37334
African	MVMR-Median	FEV	Eosin	-0.105781	0.119051	0.374252
SouthAsian	MVMR-IVW	FVC	Eosin	0.300573	0.338286	0.374263
European	MVMR-Lasso	FVC	Eosin	1.15729	1.3035	0.374631
SouthAsian	MVMR-IVW	FEV_FVCC	Neutro	-0.560961	0.633604	0.375969
African	MVMR-Lasso	FVC	HCT	-0.534708	0.604406	0.376328
European	MVMR-Egger	FVC	MCHC	9.08898	10.3254	0.37872
HispanicsLatinos	MVMR-Median	FEV_FVCC	Eosin	0.466708	0.530327	0.378839
SouthAsian	MVMR-Median	FEV_FVCC	Eosin	-0.239957	0.277453	0.387117
SouthAsian	MVMR-Lasso	FEV_FVCC	WBC	0.691292	0.800651	0.387911
African	MVMR-Lasso	FEV_FVCC	MCHC	-0.200273	0.232149	0.388308
European	MVMR-Lasso	PEF	PLT	0.819882	0.950749	0.388493
SouthAsian	MVMR-Egger	FEV	Neutro	0.51624	0.599703	0.389334
European	MVMR-Lasso	FEV	Mono	1.04699	1.21748	0.389809
SouthAsian	MVMR-Egger	FEV_FVCC	WBC	0.672555	0.784023	0.390989
African	MVMR-Median	FVC	Mono	0.0978885	0.114537	0.392746
EastAsian	MVMR-Median	PEF	PLT	0.140854	0.165469	0.394635
SouthAsian	MVMR-Median	FVC	WBC	-0.422728	0.497041	0.395054
European	MVMR-Egger	PEF	HCT	18.5203	21.9259	0.398291
SouthAsian	MVMR-Egger	FEV	Eosin	0.248342	0.294123	0.398474
SouthAsian	MVMR-IVW	FVC	MCH	-1.52056	1.81576	0.402353
SouthAsian	MVMR-IVW	FEV_FVCC	WBC	0.636065	0.761679	0.403671
HispanicsLatinos	MVMR-IVW	FVC	WBC	-1.06001	1.27067	0.404161
HispanicsLatinos	MVMR-Lasso	FVC	WBC	-1.06001	1.27067	0.404161
EastAsian	MVMR-Lasso	FEV	MCH	0.724882	0.869506	0.404466
SouthAsian	MVMR-IVW	FEV	MCHC	-0.745192	0.896103	0.405639
SouthAsian	MVMR-IVW	FEV	Eosin	0.255329	0.30801	0.407124
HispanicsLatinos	MVMR-Egger	FVC	MCH	0.596491	0.720634	0.407823
SouthAsian	MVMR-Egger	FEV_FVCC	MCHC	-0.769368	0.936198	0.41119
HispanicsLatinos	MVMR-IVW	PEF	WBC	1.04614	1.275	0.411929
HispanicsLatinos	MVMR-Lasso	PEF	WBC	1.04614	1.275	0.411929
African	MVMR-IVW	FEV_FVCC	MCHC	-0.19762	0.241044	0.412302
SouthAsian	MVMR-Lasso	PEF	Neutro	0.429631	0.525101	0.41325
African	MVMR-Egger	FEV_FVCC	MCHC	-0.197153	0.241356	0.414012
SouthAsian	MVMR-Lasso	FEV_FVCC	MCV	-0.931927	1.14125	0.414167
SouthAsian	MVMR-IVW	FEV_FVCC	MCHC	-0.745555	0.913687	0.414508
EastAsian	MVMR-IVW	FEV	HCT	1.10189	1.35249	0.415237
HispanicsLatinos	MVMR-Median	PEF	Baso	-0.508546	0.624246	0.415269
EastAsian	MVMR-IVW	FEV	PLT	0.109982	0.135567	0.417208
African	MVMR-Median	FVC	WBC	0.135544	0.167456	0.418269
African	MVMR-Median	FEV	MCHC	-0.0951833	0.117734	0.418826
European	MVMR-Median	FVC	HCT	-3.75354	4.64894	0.419438
EastAsian	MVMR-Egger	FEV	PLT	0.109911	0.136183	0.419618
African	MVMR-IVW	FEV_FVCC	WBC	0.178621	0.221483	0.419967
EastAsian	MVMR-Egger	FEV	HCT	1.10318	1.37002	0.420688
HispanicsLatinos	MVMR-Egger	PEF	WBC	1.14958	1.42775	0.42072
European	MVMR-Lasso	FVC	Mono	-0.968459	1.20366	0.421052
HispanicsLatinos	MVMR-IVW	FVC	MCH	0.577772	0.720218	0.422426
HispanicsLatinos	MVMR-Lasso	FVC	MCH	0.577772	0.720218	0.422426
SouthAsian	MVMR-Egger	FEV	Baso	-0.40295	0.503518	0.423555
European	MVMR-Median	FVC	Baso	2.17574	2.7213	0.423988
SouthAsian	MVMR-IVW	FEV	MCH	-1.31666	1.65327	0.425804
HispanicsLatinos	MVMR-Median	FEV	MCH	0.465269	0.584744	0.426218
HispanicsLatinos	MVMR-Egger	FVC	HGB	2.01298	2.53944	0.42796
European	MVMR-Lasso	FVC	HCT	11.7941	14.8932	0.428415
HispanicsLatinos	MVMR-Median	FEV	Baso	0.465565	0.588281	0.428711
European	MVMR-IVW	FEV	MCHC	8.3197	10.5568	0.430643
HispanicsLatinos	MVMR-Median	FEV	Neutro	0.562339	0.714172	0.431048
HispanicsLatinos	MVMR-Egger	FVC	HCT	-1.96118	2.49279	0.431434
SouthAsian	MVMR-IVW	FVC	Neutro	0.535127	0.682587	0.433059
HispanicsLatinos	MVMR-Median	FVC	Neutro	0.531296	0.680575	0.435004
EastAsian	MVMR-Median	FEV	PLT	-0.126111	0.161662	0.435337
HispanicsLatinos	MVMR-Egger	FEV_FVCC	HGB	-2.04277	2.62448	0.436363
European	MVMR-Egger	FVC	PLT	-1.20109	1.5448	0.436862
European	MVMR-Median	FVC	PLT	-1.06522	1.37311	0.437883
European	MVMR-IVW	FVC	MCHC	7.97654	10.3145	0.439327
HispanicsLatinos	MVMR-Egger	FEV	WBC	-1.07704	1.39362	0.439621
SouthAsian	MVMR-Median	FEV	Eosin	0.222624	0.29035	0.443234
SouthAsian	MVMR-Egger	FEV	MCHC	-0.655697	0.857262	0.444347
SouthAsian	MVMR-Lasso	FVC	Eosin	0.208796	0.27627	0.44979
SouthAsian	MVMR-Median	PEF	Eosin	-0.199724	0.265122	0.451253
SouthAsian	MVMR-IVW	FVC	Baso	-0.435229	0.577992	0.451449
SouthAsian	MVMR-Median	PEF	Mono	-0.168795	0.22441	0.451947
African	MVMR-Egger	FEV_FVCC	Neutro	-0.140198	0.187297	0.454138
SouthAsian	MVMR-Median	FEV	Baso	-0.34136	0.459765	0.457805
African	MVMR-Egger	PEF	PLT	-0.0518655	0.0699546	0.458441
African	MVMR-Lasso	PEF	Baso	-0.0785095	0.105936	0.458632
EastAsian	MVMR-IVW	PEF	MCV	-0.621711	0.842835	0.460732
European	MVMR-Egger	FEV	WBC	-4.86286	6.59646	0.461005
African	MVMR-IVW	PEF	WBC	0.165347	0.22463	0.461679
SouthAsian	MVMR-Median	FEV	Neutro	0.304583	0.41443	0.462373
African	MVMR-Egger	PEF	MCV	-0.178449	0.243023	0.462772
African	MVMR-IVW	PEF	PLT	-0.0507728	0.0698101	0.467043
African	MVMR-Median	PEF	WBC	0.112746	0.155512	0.468455
HispanicsLatinos	MVMR-IVW	FEV	WBC	-0.920781	1.27522	0.470259
HispanicsLatinos	MVMR-Lasso	FEV	WBC	-0.920781	1.27522	0.470259
HispanicsLatinos	MVMR-Egger	FVC	Eosin	-0.317746	0.440869	0.471078
European	MVMR-Median	PEF	Baso	1.96532	2.72981	0.471558
EastAsian	MVMR-Median	PEF	Baso	0.158545	0.220376	0.471875
EastAsian	MVMR-Egger	PEF	MCV	-0.603427	0.844338	0.47481
European	MVMR-IVW	PEF	HGB	-15.7348	22.018	0.474836
HispanicsLatinos	MVMR-Egger	FVC	MCHC	-0.621518	0.882902	0.481465
SouthAsian	MVMR-IVW	PEF	MCHC	-0.576434	0.823486	0.483933
African	MVMR-IVW	FEV	MCH	0.214461	0.307265	0.485197
European	MVMR-Median	PEF	Neutro	2.53362	3.63354	0.485623
European	MVMR-Median	PEF	MCH	3.10982	4.4807	0.487652
European	MVMR-Egger	PEF	MCHC	6.58863	9.51684	0.488741
African	MVMR-IVW	FEV	MCV	-0.177187	0.259304	0.494405
EastAsian	MVMR-Median	PEF	Eosin	-0.154183	0.225695	0.494516
EastAsian	MVMR-Lasso	FVC	HGB	-0.889599	1.3078	0.496362
European	MVMR-Lasso	FVC	HGB	-10.1913	14.9825	0.496371
HispanicsLatinos	MVMR-IVW	PEF	MCH	-0.485753	0.722693	0.501492
HispanicsLatinos	MVMR-Lasso	PEF	MCH	-0.485753	0.722693	0.501492
HispanicsLatinos	MVMR-IVW	FVC	MCV	-0.409311	0.609074	0.501569
HispanicsLatinos	MVMR-Lasso	FVC	MCV	-0.409311	0.609074	0.501569
African	MVMR-Lasso	FEV_FVCC	WBC	0.142479	0.212672	0.502891
European	MVMR-IVW	PEF	MCHC	6.29455	9.49941	0.50757
SouthAsian	MVMR-IVW	FEV	Baso	-0.348696	0.526265	0.507595
SouthAsian	MVMR-Lasso	FEV	HCT	1.57172	2.37321	0.507796
HispanicsLatinos	MVMR-Egger	PEF	MCH	-0.490284	0.740934	0.508156
African	MVMR-IVW	FVC	MCV	-0.177863	0.269747	0.509657
HispanicsLatinos	MVMR-Egger	FEV	Eosin	-0.290959	0.442431	0.510772
HispanicsLatinos	MVMR-IVW	FVC	Neutro	0.644006	0.987644	0.514361
HispanicsLatinos	MVMR-Lasso	FVC	Neutro	0.644006	0.987644	0.514361
African	MVMR-IVW	FEV_FVCC	Neutro	-0.119275	0.18293	0.514385
EastAsian	MVMR-Median	PEF	MCHC	0.215461	0.330525	0.514481
European	MVMR-Egger	PEF	HGB	-14.3223	22.0346	0.515699
African	MVMR-Egger	FEV_FVCC	Eosin	0.0627366	0.0967832	0.516844
EastAsian	MVMR-Lasso	FEV_FVCC	Baso	0.0954328	0.147526	0.517704
HispanicsLatinos	MVMR-Median	FEV_FVCC	MCH	-0.391639	0.606309	0.518318
European	MVMR-IVW	FEV_FVCC	Baso	-2.29251	3.55169	0.518623
SouthAsian	MVMR-IVW	PEF	MCV	0.784572	1.21878	0.519746
SouthAsian	MVMR-Lasso	FEV	MCH	0.966161	1.50515	0.520936
HispanicsLatinos	MVMR-Median	FEV	MCHC	-0.321994	0.504909	0.523651
European	MVMR-Egger	FEV_FVCC	Baso	-2.26272	3.55346	0.524278
EastAsian	MVMR-Median	PEF	Neutro	-0.218751	0.343952	0.524781
European	MVMR-Lasso	PEF	WBC	-2.61309	4.1231	0.526232
African	MVMR-IVW	PEF	MCV	-0.147068	0.232146	0.526398
African	MVMR-IVW	FEV_FVCC	Eosin	0.0611873	0.0966156	0.526533
African	MVMR-Egger	FVC	MCV	-0.178361	0.282485	0.527779
EastAsian	MVMR-IVW	PEF	MCH	0.604894	0.96295	0.529894
SouthAsian	MVMR-Egger	PEF	MCHC	-0.49072	0.782709	0.530692
African	MVMR-Egger	PEF	WBC	0.143144	0.230464	0.534527
EastAsian	MVMR-IVW	FEV	WBC	-0.287946	0.471284	0.541212
SouthAsian	MVMR-Egger	PEF	Neutro	0.334248	0.547457	0.5415
EastAsian	MVMR-Egger	FEV	WBC	-0.287911	0.471745	0.541656
SouthAsian	MVMR-IVW	FVC	MCHC	-0.599575	0.984229	0.542403
European	MVMR-IVW	FEV	WBC	-4.00298	6.59503	0.543872
EastAsian	MVMR-Median	PEF	HGB	-0.336013	0.555911	0.545553
EastAsian	MVMR-IVW	FEV_FVCC	Baso	0.0892102	0.148756	0.548702
EastAsian	MVMR-Egger	FEV_FVCC	Baso	0.0894844	0.149381	0.549149
SouthAsian	MVMR-Lasso	FVC	MCHC	-0.46118	0.770612	0.549533
SouthAsian	MVMR-IVW	FEV	Neutro	0.370528	0.621519	0.551066
EastAsian	MVMR-Lasso	FVC	MCV	-0.489084	0.823424	0.552536
African	MVMR-Lasso	PEF	WBC	0.128671	0.216801	0.552848
African	MVMR-Median	FVC	Neutro	-0.0844108	0.14243	0.553418
EastAsian	MVMR-Median	FEV_FVCC	Eosin	-0.124142	0.209523	0.553517
African	MVMR-Egger	FEV	MCV	-0.160053	0.271528	0.555557
African	MVMR-Median	FEV_FVCC	Baso	-0.0734468	0.125315	0.557812
SouthAsian	MVMR-IVW	PEF	MCH	-0.889995	1.51916	0.557979
SouthAsian	MVMR-IVW	FEV_FVCC	Eosin	-0.183707	0.313991	0.5585
HispanicsLatinos	MVMR-Median	FEV	HGB	-0.508641	0.869973	0.558774
African	MVMR-Lasso	FEV	MCV	-0.133007	0.228768	0.560965
EastAsian	MVMR-Lasso	FVC	HCT	0.71845	1.24027	0.562408
European	MVMR-Median	FEV	Baso	1.57194	2.7214	0.563519
EastAsian	MVMR-Egger	PEF	PLT	0.0727266	0.125977	0.563736
EastAsian	MVMR-Egger	FVC	MCV	-0.557617	0.968062	0.564606
EastAsian	MVMR-IVW	FVC	MCV	-0.553527	0.966156	0.566701
African	MVMR-Egger	FEV	MCH	0.18858	0.330171	0.567892
SouthAsian	MVMR-Lasso	FEV	HGB	-1.4098	2.47626	0.569134
HispanicsLatinos	MVMR-Median	FEV	HCT	0.541518	0.951861	0.569421
EastAsian	MVMR-Median	FVC	MCHC	0.206034	0.362609	0.5699
European	MVMR-Median	FEV	Mono	0.933588	1.64342	0.569984
HispanicsLatinos	MVMR-IVW	PEF	Eosin	0.220952	0.389365	0.570397
HispanicsLatinos	MVMR-Lasso	PEF	Eosin	0.220952	0.389365	0.570397
SouthAsian	MVMR-Egger	FVC	WBC	-0.448624	0.79098	0.570595
European	MVMR-Egger	PEF	Mono	1.01174	1.78522	0.570897
SouthAsian	MVMR-Egger	FEV_FVCC	Eosin	-0.181866	0.321137	0.571176
European	MVMR-Egger	FVC	HGB	13.5274	23.9066	0.571501
HispanicsLatinos	MVMR-Egger	PEF	MCHC	0.513541	0.907885	0.571635
EastAsian	MVMR-Median	FEV_FVCC	Neutro	-0.178077	0.314962	0.571807
EastAsian	MVMR-Egger	FVC	MCH	0.6284	1.1178	0.573996
EastAsian	MVMR-Median	FEV_FVCC	Mono	-0.137315	0.24459	0.574518
African	MVMR-Median	FVC	MCV	-0.0821337	0.147002	0.57635
HispanicsLatinos	MVMR-Egger	FEV_FVCC	HCT	1.43317	2.57628	0.57801
EastAsian	MVMR-IVW	FVC	MCH	0.612928	1.10385	0.578715
European	MVMR-Median	FVC	Mono	0.897631	1.62546	0.58079
HispanicsLatinos	MVMR-IVW	PEF	MCHC	0.47604	0.862296	0.580907
HispanicsLatinos	MVMR-Lasso	PEF	MCHC	0.47604	0.862296	0.580907
SouthAsian	MVMR-Egger	FEV_FVCC	Baso	0.302471	0.549829	0.582239
EastAsian	MVMR-Egger	PEF	MCH	0.535747	0.974934	0.582648
European	MVMR-IVW	PEF	Mono	0.977066	1.78543	0.58421
EastAsian	MVMR-Median	FEV	Baso	0.120474	0.220355	0.584568
African	MVMR-Lasso	FEV	Mono	-0.0499465	0.0917638	0.586239
HispanicsLatinos	MVMR-IVW	FVC	MCHC	-0.466309	0.859219	0.587328
HispanicsLatinos	MVMR-Lasso	FVC	MCHC	-0.466309	0.859219	0.587328
EastAsian	MVMR-Lasso	FEV	HGB	-0.650949	1.20026	0.587586
EastAsian	MVMR-IVW	PEF	PLT	0.0677198	0.125431	0.589269
EastAsian	MVMR-Median	FEV_FVCC	PLT	-0.0849523	0.157756	0.590229
European	MVMR-Median	FEV_FVCC	MCHC	1.65485	3.07565	0.590542
EastAsian	MVMR-Median	PEF	MCH	-0.264151	0.490966	0.590561
SouthAsian	MVMR-IVW	FEV_FVCC	Baso	0.288039	0.536541	0.591376
EastAsian	MVMR-IVW	FVC	WBC	-0.268335	0.499839	0.591376
EastAsian	MVMR-IVW	FEV	MCHC	0.415177	0.773843	0.591604
EastAsian	MVMR-Egger	FEV	MCHC	0.415241	0.774613	0.591915
SouthAsian	MVMR-Lasso	PEF	MCV	0.591791	1.10486	0.592219
EastAsian	MVMR-Egger	FVC	WBC	-0.267786	0.500323	0.592494
EastAsian	MVMR-IVW	FEV	Neutro	0.203815	0.381947	0.593603
HispanicsLatinos	MVMR-IVW	FVC	HCT	-1.22669	2.30001	0.593798
HispanicsLatinos	MVMR-Lasso	FVC	HCT	-1.22669	2.30001	0.593798
SouthAsian	MVMR-Egger	FVC	MCHC	-0.503233	0.944295	0.59409
EastAsian	MVMR-Egger	FEV	Neutro	0.20372	0.382607	0.594412
African	MVMR-IVW	FEV_FVCC	MCV	-0.121816	0.228894	0.594593
African	MVMR-Egger	FEV	Mono	-0.055694	0.104809	0.595152
SouthAsian	MVMR-Lasso	FEV	MCHC	-0.39746	0.762092	0.601992
SouthAsian	MVMR-Median	FVC	Mono	-0.115129	0.221181	0.6027
HispanicsLatinos	MVMR-Egger	PEF	HGB	-1.35708	2.61122	0.603266
HispanicsLatinos	MVMR-Egger	FVC	Mono	0.214268	0.412768	0.603691
African	MVMR-IVW	FEV	Mono	-0.0540325	0.104349	0.604592
HispanicsLatinos	MVMR-Median	PEF	MCHC	0.277486	0.536988	0.605334
HispanicsLatinos	MVMR-IVW	FVC	HGB	1.18195	2.29477	0.606508
HispanicsLatinos	MVMR-Lasso	FVC	HGB	1.18195	2.29477	0.606508
European	MVMR-Lasso	FEV_FVCC	MCHC	3.44168	6.71658	0.60836
HispanicsLatinos	MVMR-Median	FVC	Eosin	-0.252199	0.493069	0.60901
EastAsian	MVMR-Lasso	PEF	MCV	-0.376334	0.74786	0.614814
African	MVMR-Lasso	FEV_FVCC	Baso	0.05225	0.104023	0.615463
HispanicsLatinos	MVMR-IVW	PEF	HGB	-1.15625	2.30293	0.615613
HispanicsLatinos	MVMR-Lasso	PEF	HGB	-1.15625	2.30293	0.615613
HispanicsLatinos	MVMR-IVW	FEV_FVCC	Neutro	-0.506784	1.01174	0.616441
HispanicsLatinos	MVMR-Lasso	FEV_FVCC	Neutro	-0.506784	1.01174	0.616441
European	MVMR-Median	FEV_FVCC	Baso	-1.37299	2.76219	0.619142
African	MVMR-IVW	FEV_FVCC	Baso	0.0535675	0.108232	0.620648
European	MVMR-Median	PEF	PLT	-0.670583	1.35584	0.62089
HispanicsLatinos	MVMR-Egger	FEV_FVCC	MCV	0.355526	0.719144	0.621042
European	MVMR-Egger	FVC	Eosin	1.00715	2.04863	0.622988
African	MVMR-Lasso	FEV_FVCC	Neutro	-0.0857367	0.175833	0.625831
EastAsian	MVMR-Lasso	FVC	MCH	0.45311	0.938684	0.629303
EastAsian	MVMR-Lasso	FEV	HCT	0.547298	1.13442	0.629489
HispanicsLatinos	MVMR-Egger	FEV	MCH	0.347799	0.723277	0.630612
EastAsian	MVMR-Lasso	FVC	Baso	-0.0808224	0.168267	0.630999
HispanicsLatinos	MVMR-IVW	PEF	Mono	-0.173332	0.361566	0.63166
HispanicsLatinos	MVMR-Lasso	PEF	Mono	-0.173332	0.361566	0.63166
SouthAsian	MVMR-Median	FEV_FVCC	PLT	-0.08353	0.174623	0.632406
European	MVMR-IVW	FEV_FVCC	MCH	-8.756	18.5225	0.636411
HispanicsLatinos	MVMR-Egger	FEV	MCV	-0.329755	0.698322	0.636776
HispanicsLatinos	MVMR-IVW	FEV	MCH	0.340975	0.72286	0.637139
HispanicsLatinos	MVMR-Lasso	FEV	MCH	0.340975	0.72286	0.637139
European	MVMR-IVW	FVC	HGB	11.2755	23.9073	0.637189
HispanicsLatinos	MVMR-Median	PEF	Eosin	0.257531	0.546665	0.637573
EastAsian	MVMR-Lasso	FEV	Baso	0.0735817	0.158451	0.642374
European	MVMR-Egger	FEV_FVCC	MCH	-8.6436	18.6223	0.642537
HispanicsLatinos	MVMR-IVW	FEV_FVCC	HGB	-1.08533	2.35139	0.644391
HispanicsLatinos	MVMR-Lasso	FEV_FVCC	HGB	-1.08533	2.35139	0.644391
African	MVMR-Egger	FEV_FVCC	Baso	0.049621	0.108622	0.6478
HispanicsLatinos	MVMR-Egger	FEV_FVCC	WBC	0.654417	1.43487	0.648332
African	MVMR-Median	PEF	Mono	-0.0528248	0.116587	0.65048
HispanicsLatinos	MVMR-Egger	FEV	Neutro	0.551092	1.21771	0.650863
EastAsian	MVMR-Median	FEV	MCV	-0.204439	0.451906	0.650986
African	MVMR-Egger	PEF	Eosin	-0.043918	0.0981724	0.654618
SouthAsian	MVMR-Egger	FEV_FVCC	MCH	0.84676	1.89517	0.65502
European	MVMR-Egger	PEF	WBC	-2.64565	5.93913	0.655986
HispanicsLatinos	MVMR-Median	PEF	HGB	-0.410471	0.921641	0.656053
EastAsian	MVMR-IVW	FEV_FVCC	PLT	-0.0471932	0.106656	0.658141
SouthAsian	MVMR-Egger	FEV_FVCC	PLT	-0.0764898	0.173128	0.658627
European	MVMR-IVW	FEV	Mono	-0.876184	1.98416	0.658786
European	MVMR-Egger	FVC	HCT	-10.4343	23.7886	0.660933
EastAsian	MVMR-Egger	FEV_FVCC	PLT	-0.0469864	0.107141	0.660989
African	MVMR-IVW	FVC	MCH	0.139885	0.319641	0.661653
EastAsian	MVMR-Egger	PEF	Baso	0.076523	0.175646	0.663079
African	MVMR-IVW	PEF	Eosin	-0.0426152	0.0979865	0.663628
EastAsian	MVMR-Median	FVC	Eosin	0.104498	0.242508	0.666538
African	MVMR-Median	FVC	MCH	0.0681534	0.158558	0.667317
European	MVMR-Egger	FEV	Baso	-1.44628	3.3801	0.668737
EastAsian	MVMR-Lasso	FEV_FVCC	PLT	-0.0452214	0.105768	0.668977
European	MVMR-Egger	FEV	Mono	-0.835185	1.98281	0.673599
SouthAsian	MVMR-Lasso	PEF	MCH	-0.579309	1.37949	0.674527
African	MVMR-Egger	FVC	MCH	0.140637	0.343496	0.682225
European	MVMR-IVW	FVC	Mono	-0.790642	1.93863	0.683395
African	MVMR-Lasso	FEV_FVCC	MCV	-0.0893448	0.21968	0.684226
HispanicsLatinos	MVMR-Egger	PEF	Eosin	0.182354	0.453164	0.687389
SouthAsian	MVMR-Median	FVC	Eosin	0.122894	0.306066	0.688033
European	MVMR-IVW	FEV_FVCC	MCV	6.58138	16.4647	0.689357
European	MVMR-IVW	FEV	Baso	-1.35066	3.38113	0.689546
EastAsian	MVMR-IVW	PEF	Baso	0.0698831	0.174946	0.689558
SouthAsian	MVMR-Egger	FEV	WBC	-0.286161	0.718078	0.690254
HispanicsLatinos	MVMR-Egger	PEF	MCV	0.282963	0.715427	0.692462
European	MVMR-IVW	PEF	Neutro	-2.14096	5.41636	0.692639
EastAsian	MVMR-Median	PEF	HCT	0.210593	0.537144	0.695013
European	MVMR-Egger	FEV_FVCC	MCV	6.45397	16.4872	0.695462
HispanicsLatinos	MVMR-IVW	FEV	MCV	-0.235932	0.611332	0.699548
HispanicsLatinos	MVMR-Lasso	FEV	MCV	-0.235932	0.611332	0.699548
European	MVMR-Egger	FVC	Mono	-0.737124	1.93689	0.703522
EastAsian	MVMR-Median	FEV	Neutro	0.132994	0.350117	0.704053
EastAsian	MVMR-Egger	FVC	Eosin	0.0774025	0.203801	0.704098
SouthAsian	MVMR-Lasso	FEV	MCV	-0.452212	1.19431	0.704957
EastAsian	MVMR-IVW	FVC	Eosin	0.0769706	0.203563	0.705344
HispanicsLatinos	MVMR-Median	PEF	Mono	-0.208441	0.557244	0.708362
European	MVMR-IVW	FVC	Eosin	0.765882	2.04832	0.708473
European	MVMR-IVW	PEF	WBC	-2.1855	5.93447	0.712671
EastAsian	MVMR-Egger	PEF	WBC	-0.160292	0.436382	0.713381
SouthAsian	MVMR-Egger	FEV_FVCC	MCV	-0.548041	1.49416	0.713777
EastAsian	MVMR-Egger	PEF	MCHC	-0.262731	0.716566	0.713878
SouthAsian	MVMR-IVW	FVC	WBC	-0.300028	0.820636	0.714661
EastAsian	MVMR-IVW	PEF	WBC	-0.157844	0.436043	0.717358
HispanicsLatinos	MVMR-IVW	PEF	MCV	0.220847	0.611212	0.717855
HispanicsLatinos	MVMR-Lasso	PEF	MCV	0.220847	0.611212	0.717855
EastAsian	MVMR-IVW	PEF	MCHC	-0.258197	0.715995	0.718389
SouthAsian	MVMR-Lasso	FVC	MCV	0.435291	1.2079	0.718569
African	MVMR-Median	PEF	Eosin	0.0421819	0.117719	0.720098
HispanicsLatinos	MVMR-IVW	FEV	Neutro	0.354439	0.991123	0.720632
HispanicsLatinos	MVMR-Lasso	FEV	Neutro	0.354439	0.991123	0.720632
SouthAsian	MVMR-IVW	FEV_FVCC	HGB	0.909306	2.57689	0.724186
African	MVMR-Egger	FEV_FVCC	MCV	-0.0844902	0.239581	0.724344
European	MVMR-IVW	FVC	HCT	-8.32461	23.7883	0.72638
EastAsian	MVMR-Egger	FEV_FVCC	Mono	-0.0628681	0.180134	0.727083
EastAsian	MVMR-IVW	FEV_FVCC	Mono	-0.0626321	0.179671	0.727394
SouthAsian	MVMR-Median	FEV_FVCC	Baso	0.157319	0.453656	0.728757
HispanicsLatinos	MVMR-IVW	FEV	PLT	-0.07513	0.217029	0.729212
HispanicsLatinos	MVMR-Lasso	FEV	PLT	-0.07513	0.217029	0.729212
HispanicsLatinos	MVMR-Median	FVC	HCT	-0.314989	0.910909	0.729495
SouthAsian	MVMR-Lasso	PEF	WBC	-0.214882	0.62379	0.730486
SouthAsian	MVMR-IVW	FEV_FVCC	HCT	-0.840867	2.44676	0.731098
HispanicsLatinos	MVMR-IVW	FEV_FVCC	Eosin	0.136497	0.397612	0.731379
HispanicsLatinos	MVMR-Lasso	FEV_FVCC	Eosin	0.136497	0.397612	0.731379
SouthAsian	MVMR-IVW	PEF	Neutro	0.195099	0.571071	0.732624
SouthAsian	MVMR-Median	FVC	PLT	-0.0606706	0.177778	0.732899
SouthAsian	MVMR-Lasso	FVC	Baso	0.16894	0.501398	0.736164
European	MVMR-IVW	FEV	PLT	-0.532109	1.58161	0.736543
European	MVMR-Median	FEV	PLT	0.461123	1.37661	0.737648
SouthAsian	MVMR-Egger	FEV	PLT	-0.0526509	0.15856	0.739847
SouthAsian	MVMR-Median	FVC	Baso	-0.157762	0.478703	0.741731
European	MVMR-Lasso	FEV_FVCC	HGB	5.19308	15.9008	0.743976
HispanicsLatinos	MVMR-Egger	PEF	Mono	-0.136184	0.424305	0.748243
European	MVMR-Egger	PEF	MCH	-5.01811	15.9486	0.753033
EastAsian	MVMR-Lasso	PEF	MCH	0.268239	0.854385	0.753555
SouthAsian	MVMR-IVW	FEV_FVCC	MCH	0.524403	1.68551	0.755706
SouthAsian	MVMR-IVW	FEV_FVCC	PLT	-0.0467017	0.153602	0.761094
EastAsian	MVMR-Lasso	PEF	PLT	0.0337142	0.111199	0.761747
EastAsian	MVMR-Median	FVC	Baso	0.0682766	0.225899	0.762466
SouthAsian	MVMR-Egger	PEF	WBC	-0.19612	0.65553	0.764804
African	MVMR-Median	PEF	Neutro	-0.0393989	0.131713	0.764843
HispanicsLatinos	MVMR-Egger	FEV_FVCC	MCHC	0.267202	0.912511	0.769659
EastAsian	MVMR-IVW	FEV_FVCC	MCH	-0.237186	0.8188	0.772065
EastAsian	MVMR-Egger	FEV_FVCC	MCH	-0.240042	0.829155	0.772197
European	MVMR-Egger	PEF	Neutro	-1.55003	5.42579	0.775125
SouthAsian	MVMR-Median	PEF	Baso	0.124931	0.441958	0.777426
European	MVMR-Lasso	PEF	Mono	0.336706	1.20128	0.779255
European	MVMR-Median	FVC	Eosin	0.502309	1.79228	0.779275
EastAsian	MVMR-Egger	PEF	Eosin	-0.0490274	0.177749	0.782684
SouthAsian	MVMR-Median	FVC	MCV	0.127747	0.468094	0.784923
HispanicsLatinos	MVMR-Median	FEV	MCV	-0.134213	0.494212	0.785952
SouthAsian	MVMR-Median	FEV	MCV	0.121372	0.449384	0.787095
European	MVMR-Egger	FVC	Baso	-0.891233	3.30183	0.787221
African	MVMR-IVW	FVC	PLT	-0.0218304	0.0811118	0.787822
African	MVMR-Egger	FVC	PLT	-0.0218477	0.0813085	0.788159
European	MVMR-Lasso	FEV_FVCC	HCT	-4.23851	15.8043	0.788555
HispanicsLatinos	MVMR-Egger	FEV	MCHC	-0.236497	0.886117	0.789553
EastAsian	MVMR-IVW	PEF	Eosin	-0.0470987	0.177576	0.790831
SouthAsian	MVMR-Egger	FVC	PLT	-0.0458376	0.174648	0.792969
SouthAsian	MVMR-Lasso	PEF	Baso	-0.113854	0.440607	0.796096
SouthAsian	MVMR-Median	PEF	WBC	0.116033	0.455794	0.799052
HispanicsLatinos	MVMR-Egger	PEF	Baso	0.133001	0.528961	0.801475
HispanicsLatinos	MVMR-IVW	FEV_FVCC	HCT	0.586984	2.35675	0.803311
HispanicsLatinos	MVMR-Lasso	FEV_FVCC	HCT	0.586984	2.35675	0.803311
African	MVMR-IVW	FVC	Mono	0.0263438	0.108542	0.808233
African	MVMR-IVW	PEF	Neutro	-0.0449291	0.185528	0.80865
African	MVMR-Egger	FVC	Mono	0.0263921	0.10903	0.808732
EastAsian	MVMR-Egger	FVC	HGB	-0.369801	1.53973	0.810196
European	MVMR-Lasso	FEV_FVCC	Mono	0.29567	1.2316	0.810275
European	MVMR-Egger	FEV	HGB	5.86219	24.4733	0.810692
European	MVMR-Lasso	PEF	MCH	-2.55314	10.6998	0.811403
HispanicsLatinos	MVMR-Egger	FEV	HCT	-0.59548	2.50178	0.811863
SouthAsian	MVMR-Egger	PEF	Eosin	-0.0635977	0.268509	0.812769
EastAsian	MVMR-IVW	PEF	Neutro	-0.0836164	0.353378	0.812952
EastAsian	MVMR-Median	FEV_FVCC	Baso	0.0479178	0.20253	0.81297
EastAsian	MVMR-IVW	FVC	MCHC	-0.193525	0.82075	0.813595
HispanicsLatinos	MVMR-Median	FEV	PLT	0.0927817	0.394435	0.814032
EastAsian	MVMR-Egger	FVC	MCHC	-0.19251	0.821561	0.814735
SouthAsian	MVMR-IVW	FEV_FVCC	MCV	-0.316481	1.35224	0.814952
SouthAsian	MVMR-Egger	FEV_FVCC	HGB	0.633686	2.71998	0.815781
EastAsian	MVMR-Lasso	FEV_FVCC	MCH	-0.188055	0.812083	0.816871
African	MVMR-Lasso	PEF	Eosin	-0.0217084	0.0941633	0.817673
European	MVMR-Egger	FEV	PLT	-0.363172	1.58142	0.818365
EastAsian	MVMR-IVW	FVC	HGB	-0.347594	1.51898	0.818998
HispanicsLatinos	MVMR-Median	FEV	Eosin	-0.116086	0.508149	0.819298
SouthAsian	MVMR-Egger	FEV_FVCC	HCT	-0.587067	2.57791	0.819857
HispanicsLatinos	MVMR-IVW	PEF	Baso	0.108995	0.499485	0.827261
HispanicsLatinos	MVMR-Lasso	PEF	Baso	0.108995	0.499485	0.827261
European	MVMR-IVW	FVC	Baso	-0.719346	3.30354	0.827624
EastAsian	MVMR-Egger	PEF	Neutro	-0.0769229	0.353918	0.827938
EastAsian	MVMR-IVW	PEF	Mono	0.0458301	0.211306	0.828294
HispanicsLatinos	MVMR-Egger	FEV	PLT	-0.050591	0.234297	0.829045
HispanicsLatinos	MVMR-IVW	FEV	MCHC	-0.179857	0.862372	0.834791
HispanicsLatinos	MVMR-Lasso	FEV	MCHC	-0.179857	0.862372	0.834791
EastAsian	MVMR-Lasso	FEV	PLT	0.0233084	0.112049	0.835213
SouthAsian	MVMR-IVW	PEF	Eosin	-0.0569531	0.283015	0.840513
SouthAsian	MVMR-IVW	FEV	WBC	-0.148298	0.747161	0.842668
SouthAsian	MVMR-Lasso	FEV	Eosin	0.0538639	0.278479	0.846629
EastAsian	MVMR-Lasso	PEF	MCHC	-0.121806	0.637641	0.848506
EastAsian	MVMR-Egger	PEF	Mono	0.0401155	0.211809	0.849784
European	MVMR-Egger	FEV	Neutro	1.13847	6.0263	0.850158
European	MVMR-Egger	FEV_FVCC	PLT	0.309756	1.66253	0.852197
HispanicsLatinos	MVMR-Egger	FEV_FVCC	Baso	0.0989471	0.531714	0.852374
European	MVMR-IVW	FEV_FVCC	PLT	0.30606	1.6614	0.853843
EastAsian	MVMR-Egger	FEV_FVCC	MCV	0.130909	0.718084	0.855345
EastAsian	MVMR-IVW	FEV_FVCC	MCV	0.130153	0.716665	0.855889
SouthAsian	MVMR-Lasso	FEV_FVCC	PLT	0.0254102	0.145526	0.861386
HispanicsLatinos	MVMR-Egger	FEV_FVCC	MCH	-0.129179	0.744765	0.862298
European	MVMR-Median	FEV_FVCC	PLT	0.236133	1.3643	0.862589
EastAsian	MVMR-Lasso	FEV	WBC	0.0684499	0.397431	0.863256
EastAsian	MVMR-Median	PEF	MCV	0.0750344	0.437682	0.863881
EastAsian	MVMR-Egger	PEF	HCT	-0.216745	1.2674	0.864212
EastAsian	MVMR-Egger	FVC	HCT	0.242661	1.45312	0.867375
European	MVMR-IVW	PEF	MCH	-2.63508	15.8669	0.868099
EastAsian	MVMR-Median	FVC	PLT	0.0279673	0.168592	0.868246
European	MVMR-IVW	FEV	HGB	4.04727	24.4688	0.868625
European	MVMR-Lasso	FVC	PLT	-0.155574	0.960191	0.871287
EastAsian	MVMR-Median	FVC	WBC	0.0737801	0.461235	0.872911
African	MVMR-Median	FEV_FVCC	Eosin	0.0176837	0.113619	0.876316
EastAsian	MVMR-IVW	FVC	HCT	0.22228	1.43453	0.876861
EastAsian	MVMR-Lasso	FVC	MCHC	0.110233	0.714274	0.87735
African	MVMR-IVW	PEF	HGB	0.095971	0.638858	0.880589
SouthAsian	MVMR-Lasso	FEV	PLT	-0.0196932	0.131884	0.8813
European	MVMR-IVW	PEF	PLT	-0.211366	1.4232	0.881937
HispanicsLatinos	MVMR-IVW	FEV_FVCC	MCH	-0.107612	0.737935	0.884056
HispanicsLatinos	MVMR-Lasso	FEV_FVCC	MCH	-0.107612	0.737935	0.884056
African	MVMR-Egger	PEF	Neutro	-0.0273378	0.189988	0.885586
HispanicsLatinos	MVMR-IVW	FEV	HCT	-0.327343	2.30833	0.88723
HispanicsLatinos	MVMR-Lasso	FEV	HCT	-0.327343	2.30833	0.88723
EastAsian	MVMR-Lasso	FEV	MCHC	-0.0916082	0.654611	0.888705
African	MVMR-Lasso	PEF	HGB	0.0852516	0.61373	0.889523
African	MVMR-IVW	PEF	HCT	-0.083702	0.605228	0.890005
HispanicsLatinos	MVMR-Egger	FEV	HGB	0.327358	2.5486	0.897796
European	MVMR-Egger	PEF	Baso	-0.386652	3.04328	0.8989
SouthAsian	MVMR-Median	FVC	MCH	0.0659419	0.519813	0.899054
EastAsian	MVMR-Egger	PEF	HGB	0.169251	1.34295	0.899709
HispanicsLatinos	MVMR-IVW	FEV_FVCC	WBC	0.161515	1.30181	0.90126
HispanicsLatinos	MVMR-Lasso	FEV_FVCC	WBC	0.161515	1.30181	0.90126
African	MVMR-Lasso	PEF	HCT	-0.0716862	0.581395	0.901869
European	MVMR-Lasso	FEV	PLT	-0.119515	0.982847	0.903215
SouthAsian	MVMR-Egger	PEF	PLT	-0.0170511	0.144757	0.906233
EastAsian	MVMR-Lasso	FEV_FVCC	MCV	0.0834278	0.710802	0.906566
European	MVMR-Egger	PEF	MCV	1.63908	14.1201	0.907588
EastAsian	MVMR-Lasso	PEF	WBC	0.0449455	0.390093	0.908273
EastAsian	MVMR-IVW	FVC	Neutro	0.0456594	0.405087	0.910257
SouthAsian	MVMR-Median	PEF	Neutro	-0.0436013	0.394126	0.911911
SouthAsian	MVMR-Lasso	FEV_FVCC	HGB	0.234786	2.13834	0.912569
EastAsian	MVMR-Egger	FVC	Neutro	0.0441601	0.405784	0.91334
African	MVMR-Median	FEV	MCV	-0.0150961	0.139026	0.913532
EastAsian	MVMR-Lasso	PEF	HGB	-0.127741	1.18295	0.914008
HispanicsLatinos	MVMR-Egger	FEV_FVCC	Eosin	-0.0475743	0.455539	0.916824
African	MVMR-Egger	FEV_FVCC	HCT	-0.0619105	0.604806	0.918467
SouthAsian	MVMR-Lasso	FVC	MCH	-0.155721	1.53317	0.9191
HispanicsLatinos	MVMR-Egger	PEF	HCT	0.260166	2.56321	0.919154
EastAsian	MVMR-IVW	FEV	Baso	0.0190697	0.18907	0.919662
HispanicsLatinos	MVMR-IVW	FEV_FVCC	MCHC	0.0884797	0.880443	0.919952
HispanicsLatinos	MVMR-Lasso	FEV_FVCC	MCHC	0.0884797	0.880443	0.919952
EastAsian	MVMR-IVW	PEF	HCT	-0.125667	1.25143	0.920012
EastAsian	MVMR-Egger	FEV	Baso	0.0189756	0.189864	0.92039
HispanicsLatinos	MVMR-IVW	FEV_FVCC	MCV	0.059318	0.62413	0.924282
HispanicsLatinos	MVMR-Lasso	FEV_FVCC	MCV	0.059318	0.62413	0.924282
EastAsian	MVMR-Egger	FEV	MCV	-0.0858172	0.912691	0.925088
SouthAsian	MVMR-IVW	PEF	WBC	-0.0645193	0.686525	0.925125
EastAsian	MVMR-IVW	FEV	MCV	-0.0855578	0.910885	0.925166
EastAsian	MVMR-Median	PEF	WBC	0.0387047	0.418622	0.926335
European	MVMR-IVW	PEF	Baso	-0.280364	3.04247	0.926579
European	MVMR-Egger	FEV	HCT	-2.21719	24.3526	0.927456
African	MVMR-Lasso	FEV_FVCC	HCT	-0.0522203	0.574126	0.927528
European	MVMR-Egger	PEF	PLT	-0.127542	1.42384	0.928624
African	MVMR-Lasso	PEF	Neutro	-0.0158378	0.17902	0.929503
European	MVMR-Lasso	PEF	MCV	0.821816	9.52257	0.931226
EastAsian	MVMR-Median	FEV	MCH	-0.0422588	0.507101	0.933586
European	MVMR-Lasso	PEF	Neutro	0.30882	3.75027	0.934371
African	MVMR-Egger	PEF	HGB	0.053111	0.647049	0.934582
African	MVMR-IVW	FEV_FVCC	HGB	-0.0508241	0.629907	0.935692
African	MVMR-Lasso	FEV_FVCC	HGB	-0.0472049	0.606006	0.937912
EastAsian	MVMR-IVW	FVC	Baso	0.0148999	0.200555	0.940777
SouthAsian	MVMR-Egger	PEF	Baso	-0.0329932	0.459708	0.942785
African	MVMR-Egger	PEF	HCT	-0.0416091	0.613499	0.945927
EastAsian	MVMR-Egger	FVC	Baso	0.0134134	0.201396	0.946899
EastAsian	MVMR-Median	FEV	Eosin	0.0149633	0.232241	0.948628
EastAsian	MVMR-Egger	FEV	MCH	0.0656268	1.05386	0.950346
European	MVMR-IVW	PEF	MCV	0.876759	14.1041	0.950433
EastAsian	MVMR-IVW	FEV	MCH	0.0646464	1.0407	0.950469
SouthAsian	MVMR-Lasso	FVC	HCT	0.143855	2.51466	0.954381
EastAsian	MVMR-Egger	FEV	Eosin	0.0106667	0.192156	0.955731
EastAsian	MVMR-IVW	FEV	Eosin	0.0106394	0.191931	0.955793
SouthAsian	MVMR-Lasso	FVC	HGB	0.142227	2.61177	0.956572
EastAsian	MVMR-IVW	PEF	HGB	0.0700147	1.3251	0.957862
African	MVMR-Median	FEV	PLT	-0.00484663	0.0978677	0.960503
EastAsian	MVMR-Median	PEF	Mono	-0.0116744	0.255895	0.963612
EastAsian	MVMR-Lasso	PEF	Mono	0.00848073	0.188692	0.964151
SouthAsian	MVMR-Lasso	FEV_FVCC	HCT	-0.0872472	2.02764	0.965678
European	MVMR-IVW	FEV_FVCC	Mono	-0.0864273	2.08425	0.966924
European	MVMR-Egger	FEV_FVCC	Mono	-0.083617	2.0845	0.968002
SouthAsian	MVMR-Lasso	PEF	Eosin	0.010147	0.257365	0.96855
SouthAsian	MVMR-IVW	PEF	Baso	0.018907	0.483599	0.968814
SouthAsian	MVMR-Median	FEV	MCH	0.0194657	0.498804	0.968871
European	MVMR-IVW	FEV_FVCC	MCHC	0.430656	11.0893	0.969022
HispanicsLatinos	MVMR-IVW	PEF	HCT	0.0826714	2.30815	0.971428
HispanicsLatinos	MVMR-Lasso	PEF	HCT	0.0826714	2.30815	0.971428
EastAsian	MVMR-Lasso	PEF	HCT	0.0381897	1.11811	0.972753
European	MVMR-IVW	FEV_FVCC	HCT	0.861354	25.5752	0.973133
HispanicsLatinos	MVMR-IVW	FEV_FVCC	Baso	-0.0155724	0.510025	0.975642
HispanicsLatinos	MVMR-Lasso	FEV_FVCC	Baso	-0.0155724	0.510025	0.975642
European	MVMR-Egger	FEV_FVCC	MCHC	0.334842	11.1123	0.975961
European	MVMR-Median	PEF	Mono	-0.0475026	1.60553	0.976397
European	MVMR-Egger	FEV_FVCC	HCT	0.744352	25.6016	0.976805
European	MVMR-IVW	FEV	HCT	-0.586349	24.347	0.980786
European	MVMR-Egger	FEV_FVCC	HGB	0.587214	25.7285	0.981791
SouthAsian	MVMR-Lasso	FVC	PLT	-0.00286384	0.131818	0.982667
African	MVMR-Lasso	FEV	PLT	0.00150587	0.0705832	0.982979
African	MVMR-IVW	FEV_FVCC	HCT	-0.0118441	0.596749	0.984165
SouthAsian	MVMR-Median	FEV	WBC	0.0093621	0.480727	0.984462
European	MVMR-IVW	FEV_FVCC	HGB	0.431386	25.7031	0.986609
EastAsian	MVMR-Lasso	FVC	WBC	0.00449794	0.418511	0.991425
HispanicsLatinos	MVMR-IVW	FEV	HGB	0.0239887	2.3031	0.99169
HispanicsLatinos	MVMR-Lasso	FEV	HGB	0.0239887	2.3031	0.99169
European	MVMR-IVW	FEV	Neutro	0.0586089	6.01924	0.992231
EastAsian	MVMR-Lasso	FEV_FVCC	Mono	-0.000285053	0.17896	0.998729
African	MVMR-Egger	FEV_FVCC	HGB	0.000154682	0.63788	0.999807

## Sheet: Table S7
Table S7. Results in application (mrMeta after meta)
Outcome	Exposure	Method	TE.common	se.common	pval.common	TE.random	se.random	pval.random	Q	pval.Q	I2	lower.I2	upper.I2	TE.common.CIlow	TE.common.CIup	TE.random.CIlow	TE.random.CIup
FEV	MCH	MVMR-IVW	0.177081	0.26921	0.510679	0.177078	0.269219	0.510701	1.98678	0.738191	0	0	0.792036	-0.35057	0.704732	-0.350592	0.704748
FEV	MCHC	MVMR-IVW	-0.385573	0.237825	0.104964	-0.385573	0.237825	0.104964	2.0841	0.720294	0	0	0.792036	-0.851709	0.0805633	-0.851709	0.0805633
FEV	MCV	MVMR-IVW	-0.1333	0.227473	0.557873	-0.1333	0.227474	0.557876	2.40178	0.662305	0	0	0.792036	-0.579148	0.312547	-0.57915	0.31255
FEV	Mono	MVMR-IVW	-0.0407522	0.0821436	0.619817	0.0166914	0.158504	0.916133	7.34628	0.118682	0.455507	0	0.800387	-0.201754	0.120249	-0.293976	0.327359
FEV	Baso	MVMR-IVW	-0.0535386	0.0989197	0.588347	-0.0535386	0.0989197	0.588347	4.02687	0.402381	0.00667342	0	0.793424	-0.247421	0.140344	-0.247421	0.140344
FEV	Neutro	MVMR-IVW	-0.132781	0.172068	0.440304	-0.0710199	0.216968	0.74342	2.40102	0.662444	0	0	0.792036	-0.470034	0.204471	-0.496278	0.354238
FEV	PLT	MVMR-IVW	-0.0708954	0.05928	0.231719	-0.0708954	0.05928	0.231719	2.43473	0.656361	0	0	0.792036	-0.187084	0.0452933	-0.187084	0.0452933
FEV	Eosin	MVMR-IVW	-0.0916683	0.0883934	0.299713	-0.0916644	0.0883999	0.299769	6.51693	0.163727	0.386214	0	0.772363	-0.264919	0.0815827	-0.264928	0.0815995
FEV	HCT	MVMR-IVW	-0.889341	0.568158	0.117511	-0.75006	0.7383	0.309663	3.05809	0.548151	0	0	0.792036	-2.00293	0.224249	-2.19713	0.697008
FEV	HGB	MVMR-IVW	0.851729	0.597807	0.154228	0.670157	0.811608	0.408966	3.42577	0.489254	0	0	0.792036	-0.319972	2.02343	-0.920595	2.26091
FEV	WBC	MVMR-IVW	0.177028	0.209351	0.397774	0.0882272	0.27257	0.746176	3.05397	0.548834	0	0	0.792036	-0.2333	0.587356	-0.446011	0.622465
FEV	MCH	MVMR-Egger	0.124891	0.284897	0.661117	0.12489	0.284898	0.66112	4.23574	0.375041	0.0556554	0	0.80361	-0.433508	0.68329	-0.433511	0.683291
FEV	MCHC	MVMR-Egger	-0.385112	0.23786	0.105431	-0.385112	0.23786	0.105431	2.17872	0.702927	0	0	0.792036	-0.851317	0.0810926	-0.851317	0.0810926
FEV	MCV	MVMR-Egger	-0.0994765	0.240058	0.678592	-0.0994764	0.240058	0.678592	4.3492	0.360805	0.0802902	0	0.808733	-0.56999	0.371037	-0.56999	0.371037
FEV	Mono	MVMR-Egger	-0.0533046	0.08215	0.516423	-0.023083	0.129178	0.858181	5.91804	0.205353	0.324101	0	0.742799	-0.214319	0.107709	-0.276273	0.230107
FEV	Baso	MVMR-Egger	-0.0612896	0.0992551	0.536908	-0.0612896	0.0992551	0.536908	3.78723	0.435566	0	0	0.792036	-0.25583	0.13325	-0.25583	0.13325
FEV	Neutro	MVMR-Egger	-0.118393	0.175391	0.499663	-0.0199571	0.243408	0.934654	3.06712	0.546656	0	0	0.792036	-0.46216	0.225374	-0.497036	0.457122
FEV	PLT	MVMR-Egger	-0.0512175	0.0601914	0.394819	-0.0512175	0.0601914	0.394819	1.88211	0.757431	0	0	0.792036	-0.169193	0.0667577	-0.169193	0.0667577
FEV	Eosin	MVMR-Egger	-0.0832978	0.0887014	0.347689	-0.0832959	0.088704	0.347715	5.97748	0.200837	0.330822	0	0.746275	-0.257153	0.090557	-0.257156	0.0905641
FEV	HCT	MVMR-Egger	-0.987046	0.577149	0.0872268	-0.878195	0.781483	0.261117	3.69754	0.448484	0	0	0.792036	-2.11826	0.144165	-2.4099	0.653512
FEV	HGB	MVMR-Egger	0.963825	0.608045	0.112939	0.825114	0.869411	0.342595	4.10492	0.391992	0.0255607	0	0.797351	-0.227944	2.15559	-0.87893	2.52916
FEV	WBC	MVMR-Egger	0.163746	0.212942	0.44191	0.0510535	0.289093	0.859824	3.56898	0.467468	0	0	0.792036	-0.25362	0.581113	-0.515569	0.617676
FEV	MCH	MVMR-Lasso	0.301047	0.240509	0.210677	0.301051	0.240519	0.210689	5.10221	0.27697	0.216027	0	0.671349	-0.170351	0.772446	-0.170366	0.772468
FEV	MCHC	MVMR-Lasso	-0.339916	0.209077	0.103993	-0.339912	0.209084	0.10401	9.84726	0.0430806	0.593796	0	0.848351	-0.749706	0.0698744	-0.749717	0.0698938
FEV	MCV	MVMR-Lasso	-0.1895	0.203164	0.350953	-0.189502	0.203168	0.350957	5.66228	0.225829	0.293571	0	0.725911	-0.587702	0.208702	-0.587711	0.208707
FEV	Mono	MVMR-Lasso	-0.0401539	0.0718086	0.576039	0.0539561	0.168588	0.748934	9.7476	0.0449009	0.589643	0	0.846994	-0.180899	0.100591	-0.276477	0.384389
FEV	Baso	MVMR-Lasso	-0.0239572	0.0871912	0.783496	0.093838	0.161682	0.561654	6.95057	0.138524	0.424508	0	0.78834	-0.194852	0.146938	-0.223058	0.410734
FEV	Neutro	MVMR-Lasso	-0.323517	0.154846	0.0366828	-0.218759	0.223974	0.32871	6.17469	0.186477	0.352194	0	0.756843	-0.627015	-0.0200181	-0.657748	0.220231
FEV	PLT	MVMR-Lasso	-0.00192211	0.052695	0.970903	-0.00192211	0.052695	0.970903	0.199318	0.995352	0	0	0.792036	-0.105204	0.10136	-0.105204	0.10136
FEV	Eosin	MVMR-Lasso	-0.184534	0.0799622	0.0210123	-1.11677	1.01332	0.270423	21.5597	0.000245189	0.814469	0.569347	0.920071	-0.34126	-0.027808	-3.10287	0.869336
FEV	HCT	MVMR-Lasso	-0.286304	0.504036	0.57002	-0.286303	0.504037	0.570021	4.42978	0.350955	0.0970206	0	0.812213	-1.27421	0.701606	-1.27421	0.701609
FEV	HGB	MVMR-Lasso	0.342876	0.529131	0.516986	0.286062	0.574441	0.618496	3.95884	0.411605	0	0	0.792036	-0.694221	1.37997	-0.839843	1.41197
FEV	WBC	MVMR-Lasso	0.317461	0.189232	0.0934194	-0.0329143	0.384284	0.931744	9.69935	0.0458083	0.587601	0	0.846327	-0.0534335	0.688356	-0.786111	0.720282
FEV	MCH	MVMR-Median	0.128818	0.133958	0.336234	0.128818	0.13396	0.336246	12.683	0.0129331	0.684618	0.187728	0.877546	-0.133739	0.391376	-0.133745	0.39138
FEV	MCHC	MVMR-Median	-0.0437384	0.105576	0.678668	2.02527	2.26763	0.371792	31.2013	2.78518e-06	0.8718	0.724135	0.940423	-0.250668	0.163191	-2.41929	6.46983
FEV	MCV	MVMR-Median	-0.0132779	0.123338	0.91427	-0.0132774	0.123349	0.91428	13.5763	0.00877753	0.70537	0.250449	0.884188	-0.255021	0.228466	-0.255041	0.228486
FEV	Mono	MVMR-Median	-0.0520122	0.0917024	0.570588	0.0833479	0.215307	0.698674	8.76335	0.0672946	0.543553	0	0.831693	-0.231749	0.127725	-0.338654	0.50535
FEV	Baso	MVMR-Median	-0.0940991	0.109121	0.388503	-0.0827554	0.121182	0.494668	2.98328	0.560628	0	0	0.792036	-0.307977	0.119779	-0.320271	0.154761
FEV	Neutro	MVMR-Median	-0.189824	0.118296	0.108571	0.00127683	0.220065	0.995371	7.97228	0.0925989	0.498262	0	0.816026	-0.421684	0.0420364	-0.430051	0.432604
FEV	PLT	MVMR-Median	-0.0649022	0.0739607	0.380203	-0.0649022	0.0739607	0.380203	1.64657	0.8004	0	0	0.792036	-0.209865	0.0800608	-0.209865	0.0800608
FEV	Eosin	MVMR-Median	-0.0599523	0.0975254	0.53873	-0.0599507	0.097528	0.538752	6.61319	0.157797	0.395149	0	0.776217	-0.251102	0.131198	-0.251106	0.131204
FEV	HCT	MVMR-Median	-0.338031	0.156298	0.0305621	1.87228	2.25809	0.407025	46.7581	1.71244e-09	0.914453	0.830124	0.95692	-0.644376	-0.031686	-2.55358	6.29813
FEV	HGB	MVMR-Median	0.148792	0.157666	0.345315	-0.949514	1.3587	0.484652	47.2867	1.32899e-09	0.91541	0.832387	0.957309	-0.160234	0.457818	-3.61257	1.71354
FEV	WBC	MVMR-Median	0.246348	0.13964	0.0777035	-0.228573	0.372274	0.539221	14.1117	0.00694685	0.716548	0.284061	0.887777	-0.0273457	0.520041	-0.95823	0.501084
FVC	MCH	MVMR-IVW	0.191679	0.279042	0.492135	0.191679	0.279043	0.492136	2.55546	0.634734	0	0	0.792036	-0.355244	0.738602	-0.355246	0.738604
FVC	MCHC	MVMR-IVW	-0.433314	0.247893	0.0804657	-0.433314	0.247893	0.0804657	0.784006	0.940579	0	0	0.792036	-0.919183	0.0525556	-0.919183	0.0525556
FVC	MCV	MVMR-IVW	-0.189274	0.235797	0.422147	-0.189274	0.235797	0.422148	2.9201	0.571285	0	0	0.792036	-0.651436	0.272887	-0.651437	0.272888
FVC	Mono	MVMR-IVW	0.0417349	0.0863326	0.628797	0.0547249	0.112252	0.625891	4.61013	0.329688	0.132346	0	0.819559	-0.127477	0.210947	-0.165289	0.274739
FVC	Baso	MVMR-IVW	-0.0749841	0.103447	0.468539	-0.0656976	0.112185	0.558133	5.12018	0.275187	0.218778	0	0.673685	-0.27774	0.127771	-0.285581	0.154186
FVC	Neutro	MVMR-IVW	-0.149253	0.180154	0.407399	-0.100578	0.21304	0.63685	4.23459	0.375188	0.0553979	0	0.803557	-0.502355	0.203848	-0.518137	0.316981
FVC	PLT	MVMR-IVW	0.00341004	0.0621729	0.95626	0.00341004	0.0621729	0.95626	3.64097	0.45677	0	0	0.792036	-0.118449	0.125269	-0.118449	0.125269
FVC	Eosin	MVMR-IVW	-0.122265	0.0924957	0.186221	-0.0983211	0.116184	0.397413	4.06972	0.396652	0.0171315	0	0.795598	-0.303556	0.059027	-0.326043	0.1294
FVC	HCT	MVMR-IVW	-1.18109	0.593121	0.0464466	-1.18109	0.593121	0.0464466	1.4146	0.841654	0	0	0.792036	-2.34361	-0.0185719	-2.34361	-0.0185719
FVC	HGB	MVMR-IVW	1.21948	0.623849	0.0506108	1.21948	0.623849	0.0506108	1.64648	0.800415	0	0	0.792036	-0.00326604	2.44222	-0.00326604	2.44222
FVC	WBC	MVMR-IVW	0.161264	0.219216	0.46195	0.036763	0.299245	0.902224	6.33322	0.175607	0.36841	0	0.76442	-0.268399	0.590927	-0.549757	0.623283
FVC	MCH	MVMR-Egger	0.173176	0.295163	0.557396	0.173176	0.295166	0.5574	4.98569	0.288769	0.197703	0	0.833151	-0.405344	0.751696	-0.405349	0.751702
FVC	MCHC	MVMR-Egger	-0.438962	0.248123	0.0768723	-0.438962	0.248123	0.0768723	0.990658	0.911209	0	0	0.792036	-0.925283	0.0473595	-0.925283	0.0473595
FVC	MCV	MVMR-Egger	-0.191839	0.249153	0.441319	-0.191839	0.249156	0.441324	5.22899	0.264598	0.235034	0	0.686762	-0.680179	0.2965	-0.680184	0.296505
FVC	Mono	MVMR-Egger	0.0307091	0.0865234	0.722648	0.0313364	0.0888455	0.724309	3.7907	0.435071	0	0	0.792036	-0.138877	0.200295	-0.142801	0.205474
FVC	Baso	MVMR-Egger	-0.0851498	0.103842	0.412221	-0.0851498	0.103842	0.412221	4.32746	0.363499	0.0756711	0	0.807773	-0.288681	0.118381	-0.288681	0.118381
FVC	Neutro	MVMR-Egger	-0.123831	0.183874	0.500659	0.000719824	0.261294	0.997802	5.9345	0.204094	0.325975	0	0.743776	-0.484224	0.236563	-0.511417	0.512857
FVC	PLT	MVMR-Egger	0.024268	0.0631507	0.700765	0.024268	0.0631507	0.700765	2.78031	0.595236	0	0	0.792036	-0.0995073	0.148043	-0.0995073	0.148043
FVC	Eosin	MVMR-Egger	-0.107599	0.0929364	0.246957	-0.0736569	0.120312	0.540396	3.60078	0.46272	0	0	0.792036	-0.289755	0.0745561	-0.309469	0.162155
FVC	HCT	MVMR-Egger	-1.28002	0.602966	0.0337651	-1.28002	0.602966	0.0337651	2.11989	0.713719	0	0	0.792036	-2.46183	-0.0982028	-2.46183	-0.0982028
FVC	HGB	MVMR-Egger	1.33353	0.635106	0.0357548	1.33353	0.635106	0.0357548	2.40707	0.661349	0	0	0.792036	0.0887276	2.57834	0.0887276	2.57834
FVC	WBC	MVMR-Egger	0.132078	0.223215	0.554047	-0.0404076	0.326803	0.901596	7.60738	0.107066	0.474195	0	0.807345	-0.305423	0.569579	-0.680942	0.600127
FVC	MCH	MVMR-Lasso	0.38201	0.244386	0.118019	0.38201	0.244391	0.118027	2.9623	0.564154	0	0	0.792036	-0.0969858	0.861006	-0.0969973	0.861017
FVC	MCHC	MVMR-Lasso	-0.333578	0.21243	0.116347	-0.333577	0.212434	0.116354	5.17733	0.269581	0.227401	0	0.680769	-0.749942	0.0827854	-0.749947	0.0827932
FVC	MCV	MVMR-Lasso	-0.32518	0.207939	0.117859	-0.32518	0.207944	0.117868	3.88434	0.421885	0	0	0.792036	-0.732741	0.0823807	-0.73275	0.0823908
FVC	Mono	MVMR-Lasso	0.0688383	0.0725751	0.342869	0.0822341	0.115422	0.476178	6.01053	0.198363	0.334502	0	0.748146	-0.0734089	0.211086	-0.143993	0.308461
FVC	Baso	MVMR-Lasso	-0.120278	0.0894906	0.178941	-0.0353307	0.146406	0.809307	7.00125	0.135822	0.428673	0	0.79	-0.295679	0.055124	-0.322287	0.251626
FVC	Neutro	MVMR-Lasso	-0.184186	0.157103	0.241041	0.238159	0.430221	0.57987	12.8408	0.0120807	0.688492	0.199464	0.878785	-0.492109	0.123736	-0.605074	1.08139
FVC	PLT	MVMR-Lasso	0.0957211	0.053564	0.0739308	0.0957211	0.053564	0.0739308	0.94029	0.918711	0	0	0.792036	-0.00926437	0.200707	-0.00926437	0.200707
FVC	Eosin	MVMR-Lasso	-0.0604451	0.0817683	0.459771	-0.00210991	0.143403	0.988261	7.20727	0.125332	0.445005	0	0.796382	-0.220711	0.0998208	-0.283179	0.278959
FVC	HCT	MVMR-Lasso	-0.308259	0.517144	0.551122	-0.308259	0.517144	0.551122	1.67774	0.794756	0	0	0.792036	-1.32186	0.705343	-1.32186	0.705343
FVC	HGB	MVMR-Lasso	0.420099	0.541944	0.438239	0.420099	0.541944	0.438239	1.82887	0.767196	0	0	0.792036	-0.642111	1.48231	-0.642111	1.48231
FVC	WBC	MVMR-Lasso	0.129989	0.192879	0.500348	-0.401743	0.485263	0.407735	13.6678	0.00843425	0.707342	0.25639	0.88482	-0.248054	0.508032	-1.35286	0.549373
FVC	MCH	MVMR-Median	0.160947	0.141318	0.254745	-2.67315	3.37674	0.428574	24.3187	6.89443e-05	0.835517	0.627539	0.927363	-0.116036	0.43793	-9.29156	3.94527
FVC	MCHC	MVMR-Median	-0.234505	0.11056	0.0339161	1.21203	1.81116	0.503368	21.362	0.000268402	0.812751	0.564537	0.919483	-0.451202	-0.0178076	-2.33785	4.7619
FVC	MCV	MVMR-Median	-0.149307	0.129431	0.248676	2.59922	3.15315	0.409756	24.6509	5.91304e-05	0.837734	0.633582	0.928141	-0.402991	0.104376	-3.58096	8.77939
FVC	Mono	MVMR-Median	0.10449	0.0935234	0.263885	0.10449	0.0935234	0.263885	2.65933	0.61635	0	0	0.792036	-0.0788163	0.287795	-0.0788163	0.287795
FVC	Baso	MVMR-Median	-0.0927966	0.112013	0.407417	-0.0348582	0.154507	0.821505	5.32756	0.255308	0.249187	0	0.697251	-0.312341	0.126748	-0.337692	0.267975
FVC	Neutro	MVMR-Median	-0.0381569	0.124972	0.76012	-0.0381487	0.124983	0.760191	16.325	0.00261267	0.754977	0.398311	0.900221	-0.283102	0.206789	-0.283116	0.206819
FVC	PLT	MVMR-Median	0.103852	0.0756358	0.169738	0.103852	0.0756358	0.169738	3.28214	0.511767	0	0	0.792036	-0.0443947	0.252098	-0.0443947	0.252098
FVC	Eosin	MVMR-Median	-0.0823897	0.102497	0.421498	-0.0823897	0.102497	0.421498	1.64209	0.801208	0	0	0.792036	-0.283284	0.118505	-0.283284	0.118505
FVC	HCT	MVMR-Median	-0.577946	0.164461	0.000441126	-0.301177	0.687683	0.661416	19.9474	0.000511483	0.799473	0.527068	0.914975	-0.900291	-0.255602	-1.64903	1.04668
FVC	HGB	MVMR-Median	0.740413	0.165504	7.68775e-06	0.540942	0.767866	0.481137	23.9159	8.30362e-05	0.832747	0.619963	0.926393	0.416026	1.0648	-0.964075	2.04596
FVC	WBC	MVMR-Median	0.013859	0.147519	0.925151	-2.89829	2.74229	0.290563	22.8401	0.000136288	0.824869	0.598278	0.923652	-0.275278	0.302996	-8.27318	2.4766
FEV_FVCC	MCH	MVMR-IVW	0.228664	0.240591	0.341895	0.228664	0.240591	0.341895	0.909543	0.923188	0	0	0.792036	-0.242894	0.700222	-0.242894	0.700222
FEV_FVCC	MCHC	MVMR-IVW	-0.113423	0.211265	0.591353	-0.113423	0.211265	0.591353	2.05268	0.72607	0	0	0.792036	-0.527503	0.300656	-0.527503	0.300656
FEV_FVCC	MCV	MVMR-IVW	-0.0856337	0.203484	0.673873	-0.0856337	0.203484	0.673873	0.362697	0.985415	0	0	0.792036	-0.484461	0.313194	-0.484461	0.313194
FEV_FVCC	Mono	MVMR-IVW	-0.171025	0.0736003	0.0201415	-0.171025	0.0736003	0.0201415	5.87655	0.208559	0.319329	0	0.740281	-0.315282	-0.0267686	-0.315282	-0.0267686
FEV_FVCC	Baso	MVMR-IVW	0.0678724	0.0851397	0.425341	0.0678724	0.0851397	0.425341	0.67486	0.954393	0	0	0.792036	-0.0990014	0.234746	-0.0990014	0.234746
FEV_FVCC	Neutro	MVMR-IVW	-0.0266513	0.149987	0.858965	-0.0229167	0.209065	0.912715	8.93032	0.0628649	0.552088	0	0.834567	-0.320625	0.267322	-0.432685	0.386851
FEV_FVCC	PLT	MVMR-IVW	-0.161606	0.052552	0.0021039	-0.15982	0.0601631	0.00789699	5.31506	0.256471	0.247421	0	0.695983	-0.264608	-0.0586039	-0.277739	-0.0419001
FEV_FVCC	Eosin	MVMR-IVW	-0.018249	0.0772285	0.8132	-0.018249	0.0772285	0.8132	22.8782	0.000133923	0.825161	0.599084	0.923753	-0.169617	0.133119	-0.169617	0.133119
FEV_FVCC	HCT	MVMR-IVW	0.203961	0.497524	0.681841	0.203961	0.497524	0.681841	0.911908	0.922846	0	0	0.792036	-0.771186	1.17911	-0.771186	1.17911
FEV_FVCC	HGB	MVMR-IVW	-0.329174	0.524075	0.529936	-0.329174	0.524075	0.529936	1.24926	0.869924	0	0	0.792036	-1.35636	0.698014	-1.35636	0.698014
FEV_FVCC	WBC	MVMR-IVW	0.0817732	0.182591	0.654262	0.0762621	0.198258	0.700489	7.6007	0.10735	0.473733	0	0.807175	-0.276105	0.439651	-0.312324	0.464848
FEV_FVCC	MCH	MVMR-Egger	0.178104	0.255477	0.485713	0.178104	0.255477	0.485713	0.858567	0.930428	0	0	0.792036	-0.32263	0.678838	-0.32263	0.678838
FEV_FVCC	MCHC	MVMR-Egger	-0.103875	0.212194	0.624469	-0.103875	0.212194	0.624469	2.17836	0.702992	0	0	0.792036	-0.519775	0.312026	-0.519775	0.312026
FEV_FVCC	MCV	MVMR-Egger	-0.0345987	0.21444	0.871822	-0.0345987	0.21444	0.871822	0.663745	0.955723	0	0	0.792036	-0.454901	0.385703	-0.454901	0.385703
FEV_FVCC	Mono	MVMR-Egger	-0.175274	0.0744693	0.0185905	-0.175274	0.0744693	0.0185905	6.48018	0.166044	0.382733	0	0.770839	-0.321234	-0.0293142	-0.321234	-0.0293142
FEV_FVCC	Baso	MVMR-Egger	0.0687734	0.0855946	0.421698	0.0687734	0.0855946	0.421698	0.66468	0.955612	0	0	0.792036	-0.098992	0.236539	-0.098992	0.236539
FEV_FVCC	Neutro	MVMR-Egger	-0.0435192	0.153325	0.776536	-0.0534295	0.233439	0.818962	9.59305	0.04787	0.583031	0	0.844829	-0.344037	0.256998	-0.510969	0.40411
FEV_FVCC	PLT	MVMR-Egger	-0.166911	0.0535843	0.0018399	-0.166334	0.0606428	0.00609075	5.62133	0.229268	0.288425	0	0.722865	-0.271937	-0.061886	-0.285194	-0.0474746
FEV_FVCC	Eosin	MVMR-Egger	-0.0235714	0.0777935	0.76189	-1.62186	1.63595	0.321497	22.7182	0.000144146	0.823929	0.595677	0.923326	-0.176047	0.128904	-4.82831	1.5846
FEV_FVCC	HCT	MVMR-Egger	0.211509	0.506553	0.67628	0.211509	0.506553	0.67628	1.06724	0.899434	0	0	0.792036	-0.781335	1.20435	-0.781335	1.20435
FEV_FVCC	HGB	MVMR-Egger	-0.339725	0.534057	0.524697	-0.339725	0.534057	0.524697	1.51253	0.82442	0	0	0.792036	-1.38648	0.707026	-1.38648	0.707026
FEV_FVCC	WBC	MVMR-Egger	0.104534	0.186448	0.57503	0.0978897	0.21673	0.651508	7.85126	0.0971811	0.490528	0	0.813268	-0.260905	0.469972	-0.3269	0.52268
FEV_FVCC	MCH	MVMR-Lasso	0.243774	0.231775	0.292904	0.24377	0.231783	0.29293	2.77484	0.596184	0	0	0.792036	-0.210504	0.698053	-0.210525	0.698066
FEV_FVCC	MCHC	MVMR-Lasso	-0.143293	0.202568	0.47933	-0.143293	0.202568	0.47933	3.19595	0.525586	0	0	0.792036	-0.540326	0.253741	-0.540326	0.253741
FEV_FVCC	MCV	MVMR-Lasso	-0.0821368	0.195944	0.675081	-0.0821367	0.195944	0.675082	1.86878	0.759877	0	0	0.792036	-0.466187	0.301914	-0.466188	0.301914
FEV_FVCC	Mono	MVMR-Lasso	-0.17898	0.0714078	0.0121949	-0.123221	0.121846	0.311882	6.95899	0.138072	0.425204	0	0.788618	-0.31894	-0.0390211	-0.362039	0.115598
FEV_FVCC	Baso	MVMR-Lasso	0.0779212	0.0825351	0.34512	0.0779213	0.0825354	0.345121	3.76921	0.438141	0	0	0.792036	-0.0838477	0.23969	-0.0838481	0.239691
FEV_FVCC	Neutro	MVMR-Lasso	-0.047755	0.14497	0.741844	-0.0919243	0.227904	0.686693	15.509	0.00375397	0.742086	0.360244	0.896023	-0.331897	0.236387	-0.538616	0.354767
FEV_FVCC	PLT	MVMR-Lasso	-0.155774	0.0508123	0.00217184	-0.143247	0.0819498	0.0804667	8.69443	0.069208	0.539935	0	0.830468	-0.255366	-0.0561815	-0.303868	0.0173746
FEV_FVCC	Eosin	MVMR-Lasso	-0.00242558	0.0751358	0.974247	-1.85183	1.83995	0.314197	56.4486	1.61465e-11	0.929139	0.86424	0.963014	-0.149692	0.144841	-5.45814	1.75448
FEV_FVCC	HCT	MVMR-Lasso	0.213474	0.479014	0.655849	0.213474	0.479014	0.655849	1.10815	0.892978	0	0	0.792036	-0.725394	1.15234	-0.725394	1.15234
FEV_FVCC	HGB	MVMR-Lasso	-0.351922	0.504641	0.485571	-0.351922	0.504641	0.485571	1.44421	0.836476	0	0	0.792036	-1.34102	0.637175	-1.34102	0.637175
FEV_FVCC	WBC	MVMR-Lasso	0.0778024	0.177577	0.661289	0.0778023	0.177577	0.66129	14.8341	0.00505799	0.730351	0.325354	0.892224	-0.270248	0.425852	-0.270249	0.425853
FEV_FVCC	MCH	MVMR-Median	-0.0849071	0.127711	0.506153	-1.68226	1.03968	0.105651	74.7827	2.21499e-15	0.946512	0.90265	0.970611	-0.33522	0.165406	-3.72003	0.355517
FEV_FVCC	MCHC	MVMR-Median	-0.102145	0.103188	0.322228	0.318463	0.290181	0.272439	13.9107	0.00758568	0.712451	0.271758	0.88646	-0.304395	0.100104	-0.250292	0.887217
FEV_FVCC	MCV	MVMR-Median	0.227615	0.117458	0.0526418	1.35578	0.756375	0.0730571	57.9252	7.91175e-12	0.930945	0.868337	0.963782	-0.00260196	0.457832	-0.126713	2.83828
FEV_FVCC	Mono	MVMR-Median	-0.216687	0.094451	0.0217807	-0.216687	0.094451	0.0217807	4.18738	0.38124	0.0447491	0	0.801342	-0.401811	-0.0315627	-0.401811	-0.0315627
FEV_FVCC	Baso	MVMR-Median	-0.0461113	0.102223	0.651929	-0.0461113	0.102223	0.651929	1.39945	0.844291	0	0	0.792036	-0.246469	0.154247	-0.246469	0.154247
FEV_FVCC	Neutro	MVMR-Median	-0.434778	0.112674	0.000113976	-0.695114	0.29448	0.0182515	16.1594	0.00281258	0.752466	0.390918	0.899401	-0.655619	-0.213938	-1.2723	-0.117932
FEV_FVCC	PLT	MVMR-Median	-0.131998	0.0706549	0.0617322	-0.131998	0.0706549	0.0617322	2.30069	0.680643	0	0	0.792036	-0.270482	0.00648508	-0.270482	0.00648508
FEV_FVCC	Eosin	MVMR-Median	-0.0521328	0.0924117	0.572661	-1.78095	1.87276	0.341615	34.6159	5.57049e-07	0.884446	0.756511	0.945161	-0.23326	0.128994	-5.45156	1.88965
FEV_FVCC	HCT	MVMR-Median	-0.392441	0.146255	0.00729065	-0.257811	1.05471	0.806892	35.1775	4.27125e-07	0.886291	0.761171	0.945862	-0.6791	-0.105781	-2.32505	1.80942
FEV_FVCC	HGB	MVMR-Median	0.275008	0.149087	0.0650936	0.138132	1.22634	0.910318	42.6161	1.24307e-08	0.906139	0.810219	0.953578	-0.0172024	0.567218	-2.2655	2.54176
FEV_FVCC	WBC	MVMR-Median	0.618364	0.131524	2.58232e-06	0.854053	0.289251	0.00315077	14.0711	0.00707142	0.71573	0.281608	0.887514	0.360576	0.876152	0.28712	1.42099
PEF	MCH	MVMR-IVW	0.184366	0.245106	0.451938	0.184366	0.245106	0.451938	1.71135	0.788655	0	0	0.792036	-0.296042	0.664773	-0.296042	0.664773
PEF	MCHC	MVMR-IVW	-0.216151	0.215599	0.316072	-0.216151	0.215599	0.316072	1.31806	0.858304	0	0	0.792036	-0.638725	0.206422	-0.638725	0.206422
PEF	MCV	MVMR-IVW	-0.10637	0.207086	0.607495	-0.10637	0.207086	0.607495	1.23044	0.873062	0	0	0.792036	-0.512258	0.299518	-0.512258	0.299518
PEF	Mono	MVMR-IVW	-0.124269	0.0746082	0.0957881	-0.124269	0.0746082	0.0957881	1.34915	0.852983	0	0	0.792036	-0.270501	0.0219628	-0.270501	0.0219628
PEF	Baso	MVMR-IVW	-0.0580463	0.089782	0.517939	-0.0580463	0.089782	0.517939	0.997359	0.910196	0	0	0.792036	-0.234019	0.117926	-0.234019	0.117926
PEF	Neutro	MVMR-IVW	-0.060442	0.155834	0.698119	-0.060442	0.155834	0.698119	1.29791	0.86173	0	0	0.792036	-0.365877	0.244993	-0.365877	0.244993
PEF	PLT	MVMR-IVW	-0.0646484	0.0540215	0.231418	-0.0646484	0.0540215	0.231418	4.41505	0.35274	0.0940071	0	0.811586	-0.170531	0.0412338	-0.170531	0.0412338
PEF	Eosin	MVMR-IVW	-0.0388774	0.0802633	0.628121	-0.0388773	0.0802641	0.628125	2.95296	0.565728	0	0	0.792036	-0.196193	0.118439	-0.196195	0.11844
PEF	HCT	MVMR-IVW	-0.182423	0.51544	0.7234	-0.182423	0.51544	0.7234	1.64804	0.800134	0	0	0.792036	-1.19268	0.827838	-1.19268	0.827838
PEF	HGB	MVMR-IVW	0.121722	0.542673	0.822524	0.121722	0.542673	0.822524	1.55313	0.81719	0	0	0.792036	-0.941917	1.18536	-0.941917	1.18536
PEF	WBC	MVMR-IVW	0.103843	0.189514	0.583732	0.103843	0.189514	0.583732	1.1903	0.879692	0	0	0.792036	-0.267605	0.475291	-0.267605	0.475291
PEF	MCH	MVMR-Egger	0.17787	0.26058	0.494865	0.17787	0.26058	0.494865	3.30153	0.50869	0	0	0.792036	-0.332867	0.688608	-0.332867	0.688608
PEF	MCHC	MVMR-Egger	-0.214926	0.215728	0.319112	-0.214926	0.215728	0.319112	1.29385	0.862418	0	0	0.792036	-0.637753	0.2079	-0.637753	0.2079
PEF	MCV	MVMR-Egger	-0.108401	0.218561	0.61991	-0.108401	0.218561	0.61991	2.65388	0.617308	0	0	0.792036	-0.536781	0.319978	-0.536781	0.319978
PEF	Mono	MVMR-Egger	-0.11924	0.0744955	0.109457	-0.11924	0.0744955	0.109457	1.21436	0.875728	0	0	0.792036	-0.265251	0.0267707	-0.265251	0.0267707
PEF	Baso	MVMR-Egger	-0.0557313	0.0900948	0.53619	-0.0557313	0.0900948	0.53619	1.01608	0.907349	0	0	0.792036	-0.232317	0.120854	-0.232317	0.120854
PEF	Neutro	MVMR-Egger	-0.0264057	0.158709	0.867859	-0.0264057	0.158709	0.867859	1.34557	0.853597	0	0	0.792036	-0.337475	0.284663	-0.337475	0.284663
PEF	PLT	MVMR-Egger	-0.0447224	0.0548054	0.414487	-0.0447224	0.0548054	0.414487	3.92343	0.416467	0	0	0.792036	-0.152141	0.0626962	-0.152141	0.0626962
PEF	Eosin	MVMR-Egger	-0.044755	0.0804703	0.578096	-0.044755	0.0804706	0.578097	2.51686	0.641619	0	0	0.792036	-0.202477	0.112967	-0.202477	0.112967
PEF	HCT	MVMR-Egger	-0.224587	0.523497	0.667914	-0.224587	0.523497	0.667914	2.54922	0.635844	0	0	0.792036	-1.25064	0.801467	-1.25064	0.801467
PEF	HGB	MVMR-Egger	0.179546	0.551732	0.744861	0.179546	0.551732	0.744861	2.45643	0.652454	0	0	0.792036	-0.901848	1.26094	-0.901848	1.26094
PEF	WBC	MVMR-Egger	0.0700414	0.192719	0.716277	0.0700414	0.192719	0.716277	1.32486	0.857144	0	0	0.792036	-0.307687	0.44777	-0.307687	0.44777
PEF	MCH	MVMR-Lasso	0.253712	0.235002	0.280313	0.253712	0.235002	0.280313	1.72236	0.786653	0	0	0.792036	-0.206892	0.714316	-0.206892	0.714316
PEF	MCHC	MVMR-Lasso	-0.268547	0.206759	0.193999	-0.268547	0.206761	0.194002	4.59569	0.331352	0.129619	0	0.818992	-0.673795	0.136701	-0.673799	0.136704
PEF	MCV	MVMR-Lasso	-0.160115	0.198631	0.42019	-0.160115	0.198631	0.42019	1.02502	0.905979	0	0	0.792036	-0.549431	0.229201	-0.549431	0.229201
PEF	Mono	MVMR-Lasso	-0.163413	0.0720753	0.0233745	-0.163732	0.0728323	0.0245719	3.20976	0.523355	0	0	0.792036	-0.304681	-0.0221457	-0.306483	-0.0209806
PEF	Baso	MVMR-Lasso	0.0243983	0.0850868	0.774307	0.0552153	0.126371	0.662162	4.32571	0.363716	0.075297	0	0.807695	-0.142372	0.191168	-0.192472	0.302903
PEF	Neutro	MVMR-Lasso	-0.0697724	0.147683	0.636607	-0.0697724	0.147683	0.636607	2.58236	0.629952	0	0	0.792036	-0.359231	0.219686	-0.359231	0.219686
PEF	PLT	MVMR-Lasso	-0.0783179	0.0507458	0.122749	-0.0783197	0.0507485	0.12276	5.43164	0.245804	0.263574	0	0.70718	-0.17778	0.021144	-0.177787	0.0211474
PEF	Eosin	MVMR-Lasso	-0.070808	0.0760404	0.351755	-0.070808	0.0760404	0.351755	15.2256	0.00425554	0.737284	0.345993	0.894466	-0.219847	0.0782311	-0.219847	0.0782311
PEF	HCT	MVMR-Lasso	-0.222552	0.489457	0.649332	-0.222553	0.48946	0.649331	5.22562	0.264921	0.23454	0	0.686382	-1.18189	0.736784	-1.1819	0.736788
PEF	HGB	MVMR-Lasso	0.166627	0.515521	0.746529	0.166627	0.515522	0.746529	5.03019	0.284214	0.204801	0	0.661411	-0.843796	1.17705	-0.843797	1.17705
PEF	WBC	MVMR-Lasso	0.0955418	0.179343	0.594219	0.0955418	0.179343	0.594219	1.27527	0.865558	0	0	0.792036	-0.25597	0.447054	-0.25597	0.447054
PEF	MCH	MVMR-Median	0.139252	0.129095	0.28073	-0.408968	0.405041	0.312641	14.737	0.00527886	0.728575	0.320056	0.891651	-0.113773	0.392277	-1.20285	0.384912
PEF	MCHC	MVMR-Median	-0.326023	0.10399	0.00171763	-0.246124	0.297031	0.407323	9.88124	0.0424764	0.595193	0	0.848806	-0.529843	-0.122204	-0.828304	0.336056
PEF	MCV	MVMR-Median	0.0117754	0.119973	0.921813	0.321961	0.301133	0.284996	10.0281	0.0399577	0.601119	0	0.850735	-0.223371	0.246921	-0.26826	0.912182
PEF	Mono	MVMR-Median	-0.0721779	0.0943618	0.444327	-0.0721779	0.0943618	0.444327	0.328854	0.987876	0	0	0.792036	-0.257127	0.112771	-0.257127	0.112771
PEF	Baso	MVMR-Median	-0.144293	0.10467	0.168035	-0.0964508	0.152824	0.527961	3.96826	0.410318	0	0	0.792036	-0.349446	0.0608611	-0.395987	0.203085
PEF	Neutro	MVMR-Median	-0.0842576	0.116048	0.467803	-0.0842576	0.116048	0.467803	3.01285	0.555677	0	0	0.792036	-0.311711	0.143196	-0.311711	0.143196
PEF	PLT	MVMR-Median	-0.0761298	0.0723202	0.292489	-0.0761298	0.0723202	0.292489	3.16434	0.53071	0	0	0.792036	-0.217877	0.0656178	-0.217877	0.0656178
PEF	Eosin	MVMR-Median	-0.0299787	0.0954783	0.753533	-0.0299904	0.0954892	0.753467	6.61899	0.157446	0.395679	0	0.776443	-0.217116	0.157159	-0.217149	0.157168
PEF	HCT	MVMR-Median	-0.655788	0.150964	1.39917e-05	1.37913	3.03665	0.649713	84.0922	2.36342e-17	0.952433	0.915191	0.973321	-0.951678	-0.359898	-4.57271	7.33097
PEF	HGB	MVMR-Median	0.529202	0.152972	0.00054122	-0.858613	2.21564	0.698369	80.2209	1.56388e-16	0.950138	0.910366	0.972262	0.229378	0.829027	-5.20128	3.48405
PEF	WBC	MVMR-Median	0.1178	0.137269	0.390798	0.117801	0.13728	0.390832	4.266	0.371202	0.062354	0	0.805003	-0.151247	0.386847	-0.151267	0.386869

## Sheet: Table S8
Table S8. Results in application (metaMR)
metaMethod	mrMethod	outcome	exposure	beta	se	low	up	pvalue
common	MVMR-IVW	FEV	MCH	0.354407	1.66537	-2.90966	3.61847	0.831475
common	MVMR-IVW	FEV	MCHC	0.379216	1.43459	-2.43253	3.19096	0.79152
common	MVMR-IVW	FEV	MCV	0.0468518	1.35926	-2.61726	2.71096	0.972504
common	MVMR-IVW	FEV	Mono	0.0385869	0.673616	-1.28168	1.35885	0.95432
common	MVMR-IVW	FEV	Baso	-0.0405776	0.33528	-0.697715	0.61656	0.90367
common	MVMR-IVW	FEV	Neutro	-0.156253	1.0003	-2.11681	1.80431	0.875871
common	MVMR-IVW	FEV	PLT	-0.058292	0.296663	-0.639741	0.523157	0.844225
common	MVMR-IVW	FEV	Eosin	0.0537047	0.326474	-0.586173	0.693582	0.869338
common	MVMR-IVW	FEV	HCT	4.11752	4.15123	-4.01875	12.2538	0.321257
common	MVMR-IVW	FEV	HGB	-4.3262	4.38522	-12.9211	4.26868	0.323868
common	MVMR-IVW	FEV	WBC	0.0485995	1.46116	-2.81522	2.91242	0.973466
common	MVMR-Egger	FEV	MCH	1.2279	1.8229	-2.34491	4.80072	0.500567
common	MVMR-Egger	FEV	MCHC	0.131652	1.44989	-2.71009	2.97339	0.92765
common	MVMR-Egger	FEV	MCV	-0.534131	1.44592	-3.36809	2.29983	0.711826
common	MVMR-Egger	FEV	Mono	0.272466	0.702248	-1.10392	1.64885	0.698023
common	MVMR-Egger	FEV	Baso	0.0342799	0.341246	-0.634549	0.703109	0.919983
common	MVMR-Egger	FEV	Neutro	-0.0788065	1.00246	-2.0436	1.88598	0.93734
common	MVMR-Egger	FEV	PLT	-0.0978153	0.298553	-0.682969	0.487338	0.74319
common	MVMR-Egger	FEV	Eosin	-0.0744969	0.344125	-0.74897	0.599976	0.828612
common	MVMR-Egger	FEV	HCT	4.39947	4.15812	-3.7503	12.5492	0.290036
common	MVMR-Egger	FEV	HGB	-4.39827	4.38565	-12.994	4.19744	0.31592
common	MVMR-Egger	FEV	WBC	0.0146127	1.46144	-2.84976	2.87899	0.992022
common	MVMR-Lasso	FEV	MCH	0.354407	1.66537	-2.90966	3.61847	0.831475
common	MVMR-Lasso	FEV	MCHC	0.379216	1.43459	-2.43253	3.19096	0.79152
common	MVMR-Lasso	FEV	MCV	0.0468518	1.35926	-2.61726	2.71096	0.972504
common	MVMR-Lasso	FEV	Mono	0.0385869	0.673616	-1.28168	1.35885	0.95432
common	MVMR-Lasso	FEV	Baso	-0.0405776	0.33528	-0.697715	0.61656	0.90367
common	MVMR-Lasso	FEV	Neutro	-0.156253	1.0003	-2.11681	1.80431	0.875871
common	MVMR-Lasso	FEV	PLT	-0.058292	0.296663	-0.639741	0.523157	0.844225
common	MVMR-Lasso	FEV	Eosin	0.0537047	0.326474	-0.586173	0.693582	0.869338
common	MVMR-Lasso	FEV	HCT	4.11752	4.15123	-4.01875	12.2538	0.321257
common	MVMR-Lasso	FEV	HGB	-4.3262	4.38522	-12.9211	4.26868	0.323868
common	MVMR-Lasso	FEV	WBC	0.0485995	1.46116	-2.81522	2.91242	0.973466
common	MVMR-Median	FEV	MCH	-0.839507	1.30555	-3.39834	1.71932	0.520205
common	MVMR-Median	FEV	MCHC	1.15598	0.971005	-0.747151	3.05912	0.233849
common	MVMR-Median	FEV	MCV	1.00042	1.11754	-1.18991	3.19076	0.37068
common	MVMR-Median	FEV	Mono	0.0847037	0.746026	-1.37748	1.54689	0.909603
common	MVMR-Median	FEV	Baso	0.0575472	0.49938	-0.92122	1.03631	0.908257
common	MVMR-Median	FEV	Neutro	-1.26971	0.948035	-3.12782	0.588408	0.180472
common	MVMR-Median	FEV	PLT	-0.475371	0.388806	-1.23742	0.286675	0.221464
common	MVMR-Median	FEV	Eosin	-0.15459	0.396897	-0.932494	0.623314	0.696909
common	MVMR-Median	FEV	HCT	4.99104	1.47116	2.10761	7.87446	0.000692375
common	MVMR-Median	FEV	HGB	-5.47633	1.53147	-8.47796	-2.47469	0.000349085
common	MVMR-Median	FEV	WBC	1.43014	1.3535	-1.22267	4.08294	0.290683
random	MVMR-IVW	FEV	MCH	1.1305	2.34391	-3.46347	5.72448	0.629582
random	MVMR-IVW	FEV	MCHC	1.27106	1.83983	-2.33493	4.87706	0.489654
random	MVMR-IVW	FEV	MCV	-0.429056	1.75558	-3.86993	3.01181	0.806924
random	MVMR-IVW	FEV	Mono	-1.00164	0.94946	-2.86255	0.859266	0.291444
random	MVMR-IVW	FEV	Baso	0.124333	0.418568	-0.696044	0.944711	0.766432
random	MVMR-IVW	FEV	Neutro	-0.822992	1.22917	-3.23212	1.58614	0.503144
random	MVMR-IVW	FEV	PLT	0.0354193	0.521957	-0.987598	1.05844	0.945898
random	MVMR-IVW	FEV	Eosin	0.022742	0.448977	-0.857236	0.90272	0.959602
random	MVMR-IVW	FEV	HCT	9.54294	5.02684	-0.309478	19.3954	0.0576436
random	MVMR-IVW	FEV	HGB	-9.82826	5.27564	-20.1683	0.511805	0.0624691
random	MVMR-IVW	FEV	WBC	1.36767	1.77422	-2.10974	4.84507	0.440793
random	MVMR-Egger	FEV	MCH	1.62346	2.80302	-3.87035	7.11728	0.562465
random	MVMR-Egger	FEV	MCHC	0.999202	2.02574	-2.97118	4.96959	0.621835
random	MVMR-Egger	FEV	MCV	-0.756018	2.03017	-4.73507	3.22304	0.709601
random	MVMR-Egger	FEV	Mono	-0.883725	1.01818	-2.87931	1.11186	0.385422
random	MVMR-Egger	FEV	Baso	0.148233	0.425151	-0.685047	0.981513	0.727345
random	MVMR-Egger	FEV	Neutro	-0.776814	1.23758	-3.20242	1.64879	0.530207
random	MVMR-Egger	FEV	PLT	-0.0087978	0.539862	-1.06691	1.04931	0.986998
random	MVMR-Egger	FEV	Eosin	0.00299401	0.45318	-0.885223	0.891211	0.994729
random	MVMR-Egger	FEV	HCT	9.35537	5.06075	-0.563524	19.2743	0.0645138
random	MVMR-Egger	FEV	HGB	-9.54299	5.35011	-20.029	0.943041	0.0744727
random	MVMR-Egger	FEV	WBC	1.30669	1.78438	-2.19062	4.80401	0.463987
random	MVMR-Lasso	FEV	MCH	1.1305	2.34391	-3.46347	5.72448	0.629582
random	MVMR-Lasso	FEV	MCHC	1.27106	1.83983	-2.33493	4.87706	0.489654
random	MVMR-Lasso	FEV	MCV	-0.429056	1.75558	-3.86993	3.01181	0.806924
random	MVMR-Lasso	FEV	Mono	-1.00164	0.94946	-2.86255	0.859266	0.291444
random	MVMR-Lasso	FEV	Baso	0.124333	0.418568	-0.696044	0.944711	0.766432
random	MVMR-Lasso	FEV	Neutro	-0.822992	1.22917	-3.23212	1.58614	0.503144
random	MVMR-Lasso	FEV	PLT	0.0354193	0.521957	-0.987598	1.05844	0.945898
random	MVMR-Lasso	FEV	Eosin	0.022742	0.448977	-0.857236	0.90272	0.959602
random	MVMR-Lasso	FEV	HCT	9.54294	5.02684	-0.309478	19.3954	0.0576436
random	MVMR-Lasso	FEV	HGB	-9.82826	5.27564	-20.1683	0.511805	0.0624691
random	MVMR-Lasso	FEV	WBC	1.36767	1.77422	-2.10974	4.84507	0.440793
random	MVMR-Median	FEV	MCH	-1.65443	1.91168	-5.40126	2.09239	0.3868
random	MVMR-Median	FEV	MCHC	1.77177	1.37021	-0.913796	4.45734	0.195989
random	MVMR-Median	FEV	MCV	1.40575	1.50395	-1.54195	4.35345	0.349941
random	MVMR-Median	FEV	Mono	-0.785827	1.09979	-2.94138	1.36973	0.474904
random	MVMR-Median	FEV	Baso	0.0396078	0.688507	-1.30984	1.38906	0.954125
random	MVMR-Median	FEV	Neutro	-1.07611	1.34389	-3.71008	1.55787	0.423282
random	MVMR-Median	FEV	PLT	0.033876	0.7915	-1.51743	1.58519	0.965861
random	MVMR-Median	FEV	Eosin	-0.0940026	0.637553	-1.34358	1.15558	0.882783
random	MVMR-Median	FEV	HCT	6.00833	2.03886	2.01225	10.0044	0.00320964
random	MVMR-Median	FEV	HGB	-6.47757	2.12338	-10.6393	-2.31582	0.00228389
random	MVMR-Median	FEV	WBC	1.72472	1.86155	-1.92385	5.37329	0.354187
common	MVMR-IVW	FVC	MCH	0.887114	1.67791	-2.40153	4.17576	0.597012
common	MVMR-IVW	FVC	MCHC	-0.297839	1.4446	-3.1292	2.53352	0.836655
common	MVMR-IVW	FVC	MCV	-0.39008	1.37016	-3.07555	2.29539	0.775877
common	MVMR-IVW	FVC	Mono	0.00258594	0.678343	-1.32694	1.33211	0.996958
common	MVMR-IVW	FVC	Baso	-0.00211127	0.338515	-0.665588	0.661366	0.995024
common	MVMR-IVW	FVC	Neutro	0.00892308	1.00712	-1.965	1.98284	0.992931
common	MVMR-IVW	FVC	PLT	0.0141547	0.298901	-0.571681	0.599991	0.96223
common	MVMR-IVW	FVC	Eosin	0.0514522	0.329321	-0.594005	0.69691	0.875846
common	MVMR-IVW	FVC	HCT	2.38426	4.18339	-5.81503	10.5835	0.568722
common	MVMR-IVW	FVC	HGB	-2.45008	4.42061	-11.1143	6.21415	0.579414
common	MVMR-IVW	FVC	WBC	-0.0393119	1.47159	-2.92357	2.84494	0.978688
common	MVMR-Egger	FVC	MCH	1.47439	1.8351	-2.12235	5.07113	0.421722
common	MVMR-Egger	FVC	MCHC	-0.460649	1.45921	-3.32066	2.39936	0.752243
common	MVMR-Egger	FVC	MCV	-0.780512	1.45651	-3.63522	2.07419	0.592042
common	MVMR-Egger	FVC	Mono	0.15924	0.706712	-1.22589	1.54437	0.821726
common	MVMR-Egger	FVC	Baso	0.0478824	0.344375	-0.62708	0.722845	0.889417
common	MVMR-Egger	FVC	Neutro	0.0592598	1.00913	-1.9186	2.03712	0.953172
common	MVMR-Egger	FVC	PLT	-0.011925	0.300718	-0.601321	0.577471	0.968368
common	MVMR-Egger	FVC	Eosin	-0.0348407	0.346951	-0.714853	0.645172	0.920011
common	MVMR-Egger	FVC	HCT	2.58451	4.19105	-5.62981	10.7988	0.537451
common	MVMR-Egger	FVC	HGB	-2.50968	4.42125	-11.1752	6.15581	0.570279
common	MVMR-Egger	FVC	WBC	-0.0596733	1.47181	-2.94437	2.82502	0.967659
common	MVMR-Lasso	FVC	MCH	0.887114	1.67791	-2.40153	4.17576	0.597012
common	MVMR-Lasso	FVC	MCHC	-0.297839	1.4446	-3.1292	2.53352	0.836655
common	MVMR-Lasso	FVC	MCV	-0.39008	1.37016	-3.07555	2.29539	0.775877
common	MVMR-Lasso	FVC	Mono	0.00258594	0.678343	-1.32694	1.33211	0.996958
common	MVMR-Lasso	FVC	Baso	-0.00211127	0.338515	-0.665588	0.661366	0.995024
common	MVMR-Lasso	FVC	Neutro	0.00892308	1.00712	-1.965	1.98284	0.992931
common	MVMR-Lasso	FVC	PLT	0.0141547	0.298901	-0.571681	0.599991	0.96223
common	MVMR-Lasso	FVC	Eosin	0.0514522	0.329321	-0.594005	0.69691	0.875846
common	MVMR-Lasso	FVC	HCT	2.38426	4.18339	-5.81503	10.5835	0.568722
common	MVMR-Lasso	FVC	HGB	-2.45008	4.42061	-11.1143	6.21415	0.579414
common	MVMR-Lasso	FVC	WBC	-0.0393119	1.47159	-2.92357	2.84494	0.978688
common	MVMR-Median	FVC	MCH	0.00380869	1.22501	-2.39716	2.40478	0.997519
common	MVMR-Median	FVC	MCHC	-0.592155	0.926001	-2.40708	1.22277	0.522513
common	MVMR-Median	FVC	MCV	0.301515	1.055	-1.76625	2.36928	0.775034
common	MVMR-Median	FVC	Mono	0.0247279	0.71534	-1.37731	1.42677	0.972424
common	MVMR-Median	FVC	Baso	0.252835	0.486826	-0.701326	1.207	0.603514
common	MVMR-Median	FVC	Neutro	-1.39155	0.900926	-3.15733	0.374232	0.122448
common	MVMR-Median	FVC	PLT	-0.479725	0.378882	-1.22232	0.26287	0.205456
common	MVMR-Median	FVC	Eosin	-0.301495	0.380784	-1.04782	0.444828	0.428492
common	MVMR-Median	FVC	HCT	1.01119	1.3746	-1.68297	3.70536	0.461958
common	MVMR-Median	FVC	HGB	-0.947433	1.41731	-3.72531	1.83045	0.503832
common	MVMR-Median	FVC	WBC	1.90493	1.28945	-0.622341	4.43221	0.139589
random	MVMR-IVW	FVC	MCH	1.81747	2.04115	-2.1831	5.81805	0.373241
random	MVMR-IVW	FVC	MCHC	0.500701	1.76058	-2.94997	3.95137	0.776107
random	MVMR-IVW	FVC	MCV	-0.930325	1.56777	-4.0031	2.14245	0.552909
random	MVMR-IVW	FVC	Mono	-1.0076	0.879119	-2.73064	0.715444	0.251736
random	MVMR-IVW	FVC	Baso	0.150427	0.47438	-0.77934	1.08019	0.751166
random	MVMR-IVW	FVC	Neutro	-0.68144	1.27425	-3.17892	1.81604	0.592804
random	MVMR-IVW	FVC	PLT	-0.00173113	0.544007	-1.06797	1.0645	0.997461
random	MVMR-IVW	FVC	Eosin	-0.0139403	0.432594	-0.861809	0.833929	0.974293
random	MVMR-IVW	FVC	HCT	8.28957	5.20461	-1.91129	18.4904	0.11122
random	MVMR-IVW	FVC	HGB	-8.28147	5.42342	-18.9112	2.34823	0.126765
random	MVMR-IVW	FVC	WBC	1.32215	1.80351	-2.21265	4.85696	0.463497
random	MVMR-Egger	FVC	MCH	1.82517	2.5206	-3.11513	6.76546	0.469005
random	MVMR-Egger	FVC	MCHC	0.496319	1.95165	-3.32884	4.32148	0.799258
random	MVMR-Egger	FVC	MCV	-0.935426	1.84909	-4.55958	2.68873	0.612938
random	MVMR-Egger	FVC	Mono	-1.0056	0.958993	-2.88519	0.873988	0.294361
random	MVMR-Egger	FVC	Baso	0.150982	0.486222	-0.801995	1.10396	0.756165
random	MVMR-Egger	FVC	Neutro	-0.680751	1.28111	-3.19168	1.83017	0.595157
random	MVMR-Egger	FVC	PLT	-0.00257711	0.567788	-1.11542	1.11027	0.996379
random	MVMR-Egger	FVC	Eosin	-0.0143927	0.441245	-0.879216	0.850431	0.973979
random	MVMR-Egger	FVC	HCT	8.28588	5.25277	-2.00936	18.5811	0.114696
random	MVMR-Egger	FVC	HGB	-8.27624	5.51588	-19.0872	2.53468	0.133501
random	MVMR-Egger	FVC	WBC	1.32124	1.81206	-2.23033	4.87281	0.465919
random	MVMR-Lasso	FVC	MCH	1.81747	2.04115	-2.1831	5.81805	0.373241
random	MVMR-Lasso	FVC	MCHC	0.500701	1.76058	-2.94997	3.95137	0.776107
random	MVMR-Lasso	FVC	MCV	-0.930325	1.56777	-4.0031	2.14245	0.552909
random	MVMR-Lasso	FVC	Mono	-1.0076	0.879119	-2.73064	0.715444	0.251736
random	MVMR-Lasso	FVC	Baso	0.150427	0.47438	-0.77934	1.08019	0.751166
random	MVMR-Lasso	FVC	Neutro	-0.68144	1.27425	-3.17892	1.81604	0.592804
random	MVMR-Lasso	FVC	PLT	-0.00173113	0.544007	-1.06797	1.0645	0.997461
random	MVMR-Lasso	FVC	Eosin	-0.0139403	0.432594	-0.861809	0.833929	0.974293
random	MVMR-Lasso	FVC	HCT	8.28957	5.20461	-1.91129	18.4904	0.11122
random	MVMR-Lasso	FVC	HGB	-8.28147	5.42342	-18.9112	2.34823	0.126765
random	MVMR-Lasso	FVC	WBC	1.32215	1.80351	-2.21265	4.85696	0.463497
random	MVMR-Median	FVC	MCH	-0.126502	1.70566	-3.46952	3.21652	0.940878
random	MVMR-Median	FVC	MCHC	-0.119995	1.26104	-2.59158	2.35159	0.924191
random	MVMR-Median	FVC	MCV	0.333739	1.37634	-2.36383	3.03131	0.808406
random	MVMR-Median	FVC	Mono	-0.839459	0.991222	-2.78222	1.1033	0.397055
random	MVMR-Median	FVC	Baso	0.211244	0.73844	-1.23607	1.65856	0.774826
random	MVMR-Median	FVC	Neutro	-1.12161	1.24427	-3.56033	1.3171	0.367362
random	MVMR-Median	FVC	PLT	-0.0466869	0.737499	-1.49216	1.39878	0.949524
random	MVMR-Median	FVC	Eosin	-0.264042	0.546636	-1.33543	0.807346	0.629074
random	MVMR-Median	FVC	HCT	3.3316	1.88298	-0.358977	7.02219	0.0768403
random	MVMR-Median	FVC	HGB	-3.1345	1.92926	-6.91578	0.646778	0.104223
random	MVMR-Median	FVC	WBC	2.0114	1.70364	-1.32768	5.35047	0.237743
common	MVMR-IVW	FEV_FVCC	MCH	-0.521109	1.76089	-3.97239	2.93017	0.767279
common	MVMR-IVW	FEV_FVCC	MCHC	1.53231	1.51842	-1.44373	4.50835	0.312902
common	MVMR-IVW	FEV_FVCC	MCV	0.683122	1.43674	-2.13284	3.49909	0.634455
common	MVMR-IVW	FEV_FVCC	Mono	-0.219339	0.71231	-1.61544	1.17676	0.758139
common	MVMR-IVW	FEV_FVCC	Baso	0.0947125	0.352867	-0.596893	0.786318	0.788385
common	MVMR-IVW	FEV_FVCC	Neutro	-0.0628041	1.0553	-2.13115	2.00554	0.952543
common	MVMR-IVW	FEV_FVCC	PLT	0.0816168	0.31375	-0.533321	0.696555	0.794761
common	MVMR-IVW	FEV_FVCC	Eosin	0.086958	0.343708	-0.586696	0.760612	0.800268
common	MVMR-IVW	FEV_FVCC	HCT	6.78438	4.39053	-1.8209	15.3897	0.122291
common	MVMR-IVW	FEV_FVCC	HGB	-6.86278	4.63753	-15.9522	2.2266	0.138917
common	MVMR-IVW	FEV_FVCC	WBC	-0.224742	1.54113	-3.24531	2.79583	0.884056
common	MVMR-Egger	FEV_FVCC	MCH	0.00484667	1.96339	-3.84332	3.85301	0.99803
common	MVMR-Egger	FEV_FVCC	MCHC	1.38042	1.56327	-1.68352	4.44437	0.377215
common	MVMR-Egger	FEV_FVCC	MCV	0.333199	1.55676	-2.71799	3.38439	0.830521
common	MVMR-Egger	FEV_FVCC	Mono	-0.0782961	0.756362	-1.56074	1.40415	0.917553
common	MVMR-Egger	FEV_FVCC	Baso	0.140109	0.365875	-0.576993	0.857211	0.701763
common	MVMR-Egger	FEV_FVCC	Neutro	-0.0163558	1.07686	-2.12696	2.09425	0.987882
common	MVMR-Egger	FEV_FVCC	PLT	0.0572703	0.321609	-0.573072	0.687612	0.858665
common	MVMR-Egger	FEV_FVCC	Eosin	0.00968631	0.369184	-0.713902	0.733274	0.979068
common	MVMR-Egger	FEV_FVCC	HCT	6.94593	4.47732	-1.82946	15.7213	0.120816
common	MVMR-Egger	FEV_FVCC	HGB	-6.89764	4.72237	-16.1533	2.35803	0.144117
common	MVMR-Egger	FEV_FVCC	WBC	-0.245372	1.56954	-3.32162	2.83088	0.87577
common	MVMR-Lasso	FEV_FVCC	MCH	-1.42023	2.05126	-5.44063	2.60017	0.488705
common	MVMR-Lasso	FEV_FVCC	MCHC	0.71646	1.86869	-2.94611	4.37903	0.701422
common	MVMR-Lasso	FEV_FVCC	MCV	1.36634	1.64415	-1.85615	4.58882	0.405958
common	MVMR-Lasso	FEV_FVCC	Mono	-0.113697	0.756234	-1.59589	1.3685	0.880492
common	MVMR-Lasso	FEV_FVCC	Baso	0.0464483	0.333359	-0.606924	0.699821	0.889186
common	MVMR-Lasso	FEV_FVCC	Neutro	-0.323973	1.21176	-2.69899	2.05104	0.789195
common	MVMR-Lasso	FEV_FVCC	PLT	-0.0312208	0.383398	-0.782667	0.720226	0.935099
common	MVMR-Lasso	FEV_FVCC	Eosin	0.0173559	0.41228	-0.790698	0.82541	0.966421
common	MVMR-Lasso	FEV_FVCC	HCT	3.61601	5.83508	-7.82054	15.0526	0.535454
common	MVMR-Lasso	FEV_FVCC	HGB	-3.58157	6.46869	-16.26	9.09682	0.579799
common	MVMR-Lasso	FEV_FVCC	WBC	0.00694822	1.68657	-3.29866	3.31256	0.996713
common	MVMR-Median	FEV_FVCC	MCH	-0.569638	1.43899	-3.39001	2.25073	0.692209
common	MVMR-Median	FEV_FVCC	MCHC	2.53764	1.03663	0.505888	4.56939	0.0143661
common	MVMR-Median	FEV_FVCC	MCV	0.741676	1.21754	-1.64466	3.12801	0.542419
common	MVMR-Median	FEV_FVCC	Mono	0.440875	0.797388	-1.12198	2.00373	0.580333
common	MVMR-Median	FEV_FVCC	Baso	-0.406254	0.518893	-1.42327	0.610757	0.433671
common	MVMR-Median	FEV_FVCC	Neutro	1.33223	1.05358	-0.732756	3.39722	0.206059
common	MVMR-Median	FEV_FVCC	PLT	0.327268	0.390498	-0.438093	1.09263	0.401986
common	MVMR-Median	FEV_FVCC	Eosin	0.750694	0.430962	-0.0939762	1.59536	0.0815255
common	MVMR-Median	FEV_FVCC	HCT	8.23909	1.62221	5.05962	11.4186	3.79562e-07
common	MVMR-Median	FEV_FVCC	HGB	-8.83644	1.68917	-12.1472	-5.52573	1.68384e-07
common	MVMR-Median	FEV_FVCC	WBC	-2.76234	1.51038	-5.72264	0.197953	0.0674142
random	MVMR-IVW	FEV_FVCC	MCH	0.285071	2.02416	-3.68222	4.25236	0.888001
random	MVMR-IVW	FEV_FVCC	MCHC	1.11066	1.60906	-2.04305	4.26436	0.490036
random	MVMR-IVW	FEV_FVCC	MCV	0.0437986	1.63444	-3.15965	3.24725	0.978621
random	MVMR-IVW	FEV_FVCC	Mono	-0.634542	0.828163	-2.25771	0.988628	0.443555
random	MVMR-IVW	FEV_FVCC	Baso	0.198071	0.393078	-0.572348	0.96849	0.614334
random	MVMR-IVW	FEV_FVCC	Neutro	-0.542267	1.14165	-2.77986	1.69532	0.634797
random	MVMR-IVW	FEV_FVCC	PLT	0.0746546	0.339312	-0.590385	0.739694	0.825857
random	MVMR-IVW	FEV_FVCC	Eosin	0.024912	0.432309	-0.822399	0.872223	0.954047
random	MVMR-IVW	FEV_FVCC	HCT	6.34506	4.4836	-2.44263	15.1327	0.157018
random	MVMR-IVW	FEV_FVCC	HGB	-6.6032	4.68415	-15.784	2.57757	0.158631
random	MVMR-IVW	FEV_FVCC	WBC	0.793754	1.75326	-2.64258	4.23009	0.650744
random	MVMR-Egger	FEV_FVCC	MCH	0.673649	2.17849	-3.59612	4.94342	0.757149
random	MVMR-Egger	FEV_FVCC	MCHC	1.0034	1.65503	-2.24039	4.24719	0.544334
random	MVMR-Egger	FEV_FVCC	MCV	-0.20318	1.72578	-3.58566	3.1793	0.90628
random	MVMR-Egger	FEV_FVCC	Mono	-0.463023	0.898474	-2.224	1.29795	0.606313
random	MVMR-Egger	FEV_FVCC	Baso	0.219857	0.403494	-0.570977	1.01069	0.585834
random	MVMR-Egger	FEV_FVCC	Neutro	-0.460183	1.17551	-2.76413	1.84377	0.695445
random	MVMR-Egger	FEV_FVCC	PLT	0.0471283	0.350094	-0.639044	0.733301	0.892916
random	MVMR-Egger	FEV_FVCC	Eosin	-0.0227095	0.449635	-0.903978	0.858559	0.959719
random	MVMR-Egger	FEV_FVCC	HCT	6.50099	4.58979	-2.49484	15.4968	0.156658
random	MVMR-Egger	FEV_FVCC	HGB	-6.62602	4.78669	-16.0078	2.75572	0.166279
random	MVMR-Egger	FEV_FVCC	WBC	0.704897	1.79839	-2.81988	4.22968	0.695088
random	MVMR-Lasso	FEV_FVCC	MCH	0.872444	1.93097	-2.91219	4.65708	0.651402
random	MVMR-Lasso	FEV_FVCC	MCHC	1.96452	1.5633	-1.09949	5.02852	0.208881
random	MVMR-Lasso	FEV_FVCC	MCV	-0.432847	1.55932	-3.48906	2.62336	0.781329
random	MVMR-Lasso	FEV_FVCC	Mono	-1.05748	0.803086	-2.6315	0.516542	0.187916
random	MVMR-Lasso	FEV_FVCC	Baso	0.134457	0.372924	-0.59646	0.865374	0.718438
random	MVMR-Lasso	FEV_FVCC	Neutro	0.059085	1.10876	-2.11405	2.23222	0.957501
random	MVMR-Lasso	FEV_FVCC	PLT	0.283452	0.332558	-0.36835	0.935254	0.394027
random	MVMR-Lasso	FEV_FVCC	Eosin	0.238366	0.418568	-0.582012	1.05874	0.569031
random	MVMR-Lasso	FEV_FVCC	HCT	8.3226	4.32145	-0.147289	16.7925	0.0541193
random	MVMR-Lasso	FEV_FVCC	HGB	-9.52819	4.59554	-18.5353	-0.521098	0.0381391
random	MVMR-Lasso	FEV_FVCC	WBC	-0.100526	1.70007	-3.43261	3.23156	0.952848
random	MVMR-Median	FEV_FVCC	MCH	-1.6966	1.66095	-4.95199	1.55879	0.307033
random	MVMR-Median	FEV_FVCC	MCHC	2.7167	1.14911	0.464491	4.9689	0.0180698
random	MVMR-Median	FEV_FVCC	MCV	1.58345	1.39776	-1.15611	4.32302	0.257278
random	MVMR-Median	FEV_FVCC	Mono	-0.253952	0.938071	-2.09254	1.58463	0.786609
random	MVMR-Median	FEV_FVCC	Baso	-0.046016	0.624588	-1.27019	1.17815	0.94127
random	MVMR-Median	FEV_FVCC	Neutro	-0.87358	1.21145	-3.24798	1.50082	0.470847
random	MVMR-Median	FEV_FVCC	PLT	-0.22874	0.451633	-1.11393	0.656445	0.612524
random	MVMR-Median	FEV_FVCC	Eosin	0.166364	0.622566	-1.05384	1.38657	0.789297
random	MVMR-Median	FEV_FVCC	HCT	8.04361	1.89311	4.33317	11.754	2.14842e-05
random	MVMR-Median	FEV_FVCC	HGB	-8.70432	1.93388	-12.4947	-4.91399	6.76459e-06
random	MVMR-Median	FEV_FVCC	WBC	1.39472	1.79502	-2.12346	4.91289	0.437164
common	MVMR-IVW	PEF	MCH	0.968479	1.66309	-2.29112	4.22808	0.56034
common	MVMR-IVW	PEF	MCHC	-0.668633	1.43322	-3.4777	2.14043	0.64084
common	MVMR-IVW	PEF	MCV	-0.565227	1.35733	-3.22555	2.0951	0.677099
common	MVMR-IVW	PEF	Mono	-0.505821	0.672635	-1.82416	0.812519	0.452051
common	MVMR-IVW	PEF	Baso	-0.0474322	0.334316	-0.70268	0.607816	0.887176
common	MVMR-IVW	PEF	Neutro	-0.178236	0.998104	-2.13448	1.77801	0.858272
common	MVMR-IVW	PEF	PLT	0.0876271	0.296287	-0.493084	0.668338	0.76742
common	MVMR-IVW	PEF	Eosin	0.225035	0.325521	-0.412975	0.863045	0.489373
common	MVMR-IVW	PEF	HCT	0.78787	4.14663	-7.33938	8.91512	0.849307
common	MVMR-IVW	PEF	HGB	-0.939656	4.38036	-9.525	7.64569	0.830145
common	MVMR-IVW	PEF	WBC	0.0882034	1.45779	-2.76901	2.94542	0.951753
common	MVMR-Egger	PEF	MCH	2.42155	1.8205	-1.14656	5.98967	0.183466
common	MVMR-Egger	PEF	MCHC	-1.0823	1.44864	-3.92159	1.75699	0.454995
common	MVMR-Egger	PEF	MCV	-1.53171	1.44393	-4.36177	1.29834	0.288784
common	MVMR-Egger	PEF	Mono	-0.116683	0.701259	-1.49112	1.25776	0.867849
common	MVMR-Egger	PEF	Baso	0.0773568	0.340311	-0.58964	0.744354	0.820181
common	MVMR-Egger	PEF	Neutro	-0.0502323	1.00023	-2.01065	1.91019	0.959947
common	MVMR-Egger	PEF	PLT	0.0214483	0.2982	-0.563013	0.60591	0.942661
common	MVMR-Egger	PEF	Eosin	0.0116144	0.34321	-0.661065	0.684294	0.973004
common	MVMR-Egger	PEF	HCT	1.25155	4.15336	-6.88888	9.39199	0.763159
common	MVMR-Egger	PEF	HGB	-1.05406	4.38075	-9.64017	7.53204	0.809856
common	MVMR-Egger	PEF	WBC	0.0323694	1.45807	-2.82539	2.89013	0.982288
common	MVMR-Lasso	PEF	MCH	0.968479	1.66309	-2.29112	4.22808	0.56034
common	MVMR-Lasso	PEF	MCHC	-0.668633	1.43322	-3.4777	2.14043	0.64084
common	MVMR-Lasso	PEF	MCV	-0.565227	1.35733	-3.22555	2.0951	0.677099
common	MVMR-Lasso	PEF	Mono	-0.505821	0.672635	-1.82416	0.812519	0.452051
common	MVMR-Lasso	PEF	Baso	-0.0474322	0.334316	-0.70268	0.607816	0.887176
common	MVMR-Lasso	PEF	Neutro	-0.178236	0.998104	-2.13448	1.77801	0.858272
common	MVMR-Lasso	PEF	PLT	0.0876271	0.296287	-0.493084	0.668338	0.76742
common	MVMR-Lasso	PEF	Eosin	0.225035	0.325521	-0.412975	0.863045	0.489373
common	MVMR-Lasso	PEF	HCT	0.78787	4.14663	-7.33938	8.91512	0.849307
common	MVMR-Lasso	PEF	HGB	-0.939656	4.38036	-9.525	7.64569	0.830145
common	MVMR-Lasso	PEF	WBC	0.0882034	1.45779	-2.76901	2.94542	0.951753
common	MVMR-Median	PEF	MCH	1.2006	1.33985	-1.42545	3.82666	0.370214
common	MVMR-Median	PEF	MCHC	-0.987969	0.990962	-2.93022	0.95428	0.318774
common	MVMR-Median	PEF	MCV	-0.999974	1.12874	-3.21226	1.21231	0.375659
common	MVMR-Median	PEF	Mono	-0.519273	0.727773	-1.94568	0.907136	0.47553
common	MVMR-Median	PEF	Baso	0.0370208	0.523857	-0.98972	1.06376	0.943661
common	MVMR-Median	PEF	Neutro	-0.657258	0.955296	-2.5296	1.21509	0.491443
common	MVMR-Median	PEF	PLT	-0.0977673	0.373397	-0.829613	0.634078	0.793451
common	MVMR-Median	PEF	Eosin	0.121603	0.409043	-0.680106	0.923311	0.766248
common	MVMR-Median	PEF	HCT	-1.01157	1.51503	-3.98097	1.95782	0.50433
common	MVMR-Median	PEF	HGB	0.840033	1.55446	-2.20666	3.88672	0.58892
common	MVMR-Median	PEF	WBC	0.864925	1.35681	-1.79438	3.52423	0.523819
random	MVMR-IVW	PEF	MCH	-0.0541508	2.52465	-5.00238	4.89408	0.982888
random	MVMR-IVW	PEF	MCHC	-0.549236	1.70393	-3.88888	2.79041	0.7472
random	MVMR-IVW	PEF	MCV	0.136817	1.89529	-3.57789	3.85153	0.942452
random	MVMR-IVW	PEF	Mono	-0.129069	0.959448	-2.00955	1.75141	0.892988
random	MVMR-IVW	PEF	Baso	-0.107449	0.387178	-0.866304	0.651406	0.781382
random	MVMR-IVW	PEF	Neutro	-0.0961647	1.15149	-2.35305	2.16072	0.933444
random	MVMR-IVW	PEF	PLT	-0.0478174	0.342023	-0.71817	0.622535	0.888812
random	MVMR-IVW	PEF	Eosin	0.308379	0.410704	-0.496586	1.11334	0.45274
random	MVMR-IVW	PEF	HCT	-0.467478	4.55164	-9.38853	8.45358	0.918197
random	MVMR-IVW	PEF	HGB	0.412247	4.75159	-8.90071	9.7252	0.930862
random	MVMR-IVW	PEF	WBC	-0.124522	1.802	-3.65637	3.40733	0.944908
random	MVMR-Egger	PEF	MCH	1.64158	2.65193	-3.5561	6.83926	0.535907
random	MVMR-Egger	PEF	MCHC	-1.00057	1.71757	-4.36695	2.36582	0.560199
random	MVMR-Egger	PEF	MCV	-0.930815	1.96298	-4.77819	2.91656	0.635369
random	MVMR-Egger	PEF	Mono	0.382437	0.990196	-1.55831	2.32319	0.699331
random	MVMR-Egger	PEF	Baso	-0.0578474	0.387906	-0.818128	0.702433	0.881453
random	MVMR-Egger	PEF	Neutro	0.220811	1.16145	-2.05558	2.4972	0.849217
random	MVMR-Egger	PEF	PLT	-0.0837108	0.342454	-0.754908	0.587487	0.806887
random	MVMR-Egger	PEF	Eosin	0.186656	0.414816	-0.626369	0.999681	0.65273
random	MVMR-Egger	PEF	HCT	0.509329	4.57559	-8.45867	9.47733	0.911367
random	MVMR-Egger	PEF	HGB	-0.118822	4.75839	-9.44509	9.20745	0.980078
random	MVMR-Egger	PEF	WBC	-0.520228	1.81192	-4.07153	3.03108	0.774025
random	MVMR-Lasso	PEF	MCH	-0.0541508	2.52465	-5.00238	4.89408	0.982888
random	MVMR-Lasso	PEF	MCHC	-0.549236	1.70393	-3.88888	2.79041	0.7472
random	MVMR-Lasso	PEF	MCV	0.136817	1.89529	-3.57789	3.85153	0.942452
random	MVMR-Lasso	PEF	Mono	-0.129069	0.959448	-2.00955	1.75141	0.892988
random	MVMR-Lasso	PEF	Baso	-0.107449	0.387178	-0.866304	0.651406	0.781382
random	MVMR-Lasso	PEF	Neutro	-0.0961647	1.15149	-2.35305	2.16072	0.933444
random	MVMR-Lasso	PEF	PLT	-0.0478174	0.342023	-0.71817	0.622535	0.888812
random	MVMR-Lasso	PEF	Eosin	0.308379	0.410704	-0.496586	1.11334	0.45274
random	MVMR-Lasso	PEF	HCT	-0.467478	4.55164	-9.38853	8.45358	0.918197
random	MVMR-Lasso	PEF	HGB	0.412247	4.75159	-8.90071	9.7252	0.930862
random	MVMR-Lasso	PEF	WBC	-0.124522	1.802	-3.65637	3.40733	0.944908
random	MVMR-Median	PEF	MCH	-1.63767	1.72522	-5.01905	1.7437	0.342492
random	MVMR-Median	PEF	MCHC	0.868838	1.30074	-1.68056	3.41823	0.50416
random	MVMR-Median	PEF	MCV	1.26828	1.3798	-1.43609	3.97264	0.358006
random	MVMR-Median	PEF	Mono	0.381286	0.899306	-1.38132	2.14389	0.671582
random	MVMR-Median	PEF	Baso	-0.472326	0.607537	-1.66308	0.718425	0.436897
random	MVMR-Median	PEF	Neutro	-0.374283	1.16556	-2.65873	1.91017	0.74812
random	MVMR-Median	PEF	PLT	-0.145998	0.431543	-0.991807	0.699811	0.735125
random	MVMR-Median	PEF	Eosin	0.727709	0.54829	-0.346921	1.80234	0.184432
random	MVMR-Median	PEF	HCT	0.785834	1.83202	-2.80485	4.37652	0.667963
random	MVMR-Median	PEF	HGB	-1.10515	1.86744	-4.76526	2.55496	0.553983
random	MVMR-Median	PEF	WBC	-0.15145	1.70984	-3.50267	3.19977	0.929419

## Sheet: Table S9
Table S9. Results in application (MR-EILLS)
Out	Exp	Beta	low	up	Sig
FEV	MCH	0.05	0.180953	-0.0887524
FEV	MCHC	0.05	0.200211	-0.0965603
FEV	MCV	0.05	0.188324	-0.0908243
FEV	Mono	0.05	0.660446	-0.570088
FEV	Baso	0.06	0.233754	-0.0800882
FEV	Neutro	-0.17	-0.0712402	-0.2706	*
FEV	PLT	-0.02	0.0779135	-0.108195
FEV	Eosin	-0.02	0.0864086	-0.117845
FEV	HCT	-0.09	0.0222661	-0.207828
FEV	HGB	-0.29	-0.0252479	-0.546876	*
FEV	WBC	-0.14	-0.0400689	-0.234443	*
FVC	MCH	0.08	0.194051	-0.0353704
FVC	MCHC	0.03	0.250838	-0.189529
FVC	MCV	0.08	0.177051	-0.0225144
FVC	Mono	-0.05	0.0882562	-0.196604
FVC	Baso	0.05	0.136014	-0.0286193
FVC	Neutro	-0.09	-0.00899576	-0.17547	*
FVC	PLT	0.01	0.112318	-0.0884514
FVC	Eosin	-0.03	0.0617458	-0.113372
FVC	HCT	-0.06	-0.0016871	-0.126671	*
FVC	HGB	-0.05	0.0277182	-0.133587
FVC	WBC	-0.09	0.0113194	-0.195313
FEV_FVC	MCH	-0.05	0.0180933	-0.1274
FEV_FVC	MCHC	-0.06	0.0571683	-0.175787
FEV_FVC	MCV	0	0.106228	-0.102979
FEV_FVC	Mono	0.15	0.436554	-0.143242
FEV_FVC	Baso	0.09	0.189432	-0.019299
FEV_FVC	Neutro	-0.16	-0.0212929	-0.300987	*
FEV_FVC	PLT	-0.26	-0.0246574	-0.486834	*
FEV_FVC	Eosin	-0.05	0.111341	-0.216885
FEV_FVC	HCT	-0.1	0.113523	-0.311975
FEV_FVC	HGB	-0.08	0.101678	-0.262355
FEV_FVC	WBC	-0.03	0.091873	-0.161454
PEF	MCH	-0.08	-0.0014624	-0.160867	*
PEF	MCHC	-0.09	0.225467	-0.398636
PEF	MCV	-0.03	0.18603	-0.240926
PEF	Mono	-0.06	0.0839233	-0.20958
PEF	Baso	0.06	0.208166	-0.0905991
PEF	Neutro	-0.06	0.0517125	-0.175627
PEF	PLT	-0.07	0.0337887	-0.17644
PEF	Eosin	0	0.118683	-0.119607
PEF	HCT	-0.05	0.16249	-0.255848
PEF	HGB	-0.07	0.175612	-0.307706
PEF	WBC	-0.05	0.0287037	-0.137362

## Sheet: Table S10
Table S10. IVs in application (mrMeta and MR-EILLS)
ethnic	chromosome	base_pair_location	effect_allele	other_allele	effect_allele_frequency	beta	standard_error	p_value	ID	Phenotype	SNP
African	10	64862314	T	G	0.573692	-0.009251	0.01339	0.489641	10:64862314_T_G	MCH	rs4363488
African	11	3953878	C	T	0.97395	0.179984	0.041659	1.58e-05	11:3953878_C_T	MCH	rs112706563
African	11	4947734	T	G	0.975777	0.18124	0.043626	3.3e-05	11:4947734_T_G	MCH	rs59618482
African	11	5214857	A	G	0.449729	0.064975	0.013583	1.75e-06	11:5214857_A_G	MCH	rs7482866
African	11	5259768	A	G	0.715188	-0.048252	0.015152	0.001456	11:5259768_A_G	MCH	rs10488681
African	11	5306996	C	T	0.961238	0.081589	0.035651	0.022128	11:5306996_C_T	MCH	rs112915912
African	11	63698035	T	A	0.375071	0.023186	0.013884	0.094931	11:63698035_T_A	MCH	rs11231642
African	12	111843000	T	C	0.864966	0.009633	0.019408	0.619683	12:111843000_T_C	MCH	rs114985662
African	13	113969390	T	C	0.508615	-0.036714	0.013651	0.007174	13:113969390_T_C	MCH	rs7326696
African	14	64692465	T	C	0.467245	-0.023408	0.013301	0.078443	14:64692465_T_C	MCH	rs1048315
African	16	108585	T	C	0.126741	0.167762	0.029569	1.43e-08	16:108585_T_C	MCH	rs216598
African	16	130429	G	C	0.957194	0.201261	0.033296	1.54e-09	16:130429_G_C	MCH	rs3176399
African	16	136142	C	T	0.137415	0.14304	0.02603	3.99e-08	16:136142_C_T	MCH	rs2541623
African	16	143503	C	T	0.89301	-0.13916	0.021913	2.22e-10	16:143503_C_T	MCH	rs6600233
African	16	174926	A	C	0.879988	-0.171129	0.02022	2.74e-17	16:174926_A_C	MCH	rs34291820
African	16	2028402	A	C	0.401352	0.061988	0.014114	1.14e-05	16:2028402_A_C	MCH	rs8460
African	16	207373	A	T	0.95498	-0.181014	0.033019	4.3e-08	16:207373_A_T	MCH	rs538965378
African	16	225185	A	G	0.984784	0.481515	0.063256	2.82e-14	16:225185_A_G	MCH	rs555255920
African	16	3004161	T	A	0.16631	0.095571	0.021878	1.27e-05	16:3004161_T_A	MCH	rs4785921
African	16	304514	C	T	0.868053	-0.129545	0.019538	3.47e-11	16:304514_C_T	MCH	rs3213508
African	16	319822	G	C	0.983461	0.568365	0.056573	1.02e-23	16:319822_G_C	MCH	rs112877257
African	16	321754	T	G	0.965477	-0.221739	0.041176	7.4e-08	16:321754_T_G	MCH	rs183388202
African	16	324479	C	G	0.77787	0.343395	0.018864	5.51e-74	16:324479_C_G	MCH	rs3752435
African	16	326773	A	G	0.755095	0.206327	0.019061	2.83e-27	16:326773_A_G	MCH	rs73486221
African	16	336071	A	T	0.978171	0.535252	0.074215	5.73e-13	16:336071_A_T	MCH	rs546817919
African	16	360148	C	T	0.861775	-0.112532	0.019308	5.76e-09	16:360148_C_T	MCH	rs55931984
African	16	408299	C	T	0.962502	0.254908	0.036273	2.18e-12	16:408299_C_T	MCH	rs77621702
African	16	418154	G	C	0.966852	-0.236793	0.043209	4.35e-08	16:418154_G_C	MCH	rs150051846
African	16	4473077	T	C	0.832384	-0.099579	0.018032	3.42e-08	16:4473077_T_C	MCH	rs3948237
African	16	449659	G	A	0.438596	-0.093437	0.013765	1.18e-11	16:449659_G_A	MCH	rs14293
African	16	450759	C	G	0.257293	0.128756	0.016738	1.51e-14	16:450759_C_G	MCH	rs407983
African	16	617757	A	G	0.96932	0.339576	0.042056	7.12e-16	16:617757_A_G	MCH	rs115165076
African	16	66679	T	C	0.724497	-0.160384	0.026879	2.49e-09	16:66679_T_C	MCH	rs575317242
African	16	68704	C	T	0.966401	0.52589	0.064296	3e-16	16:68704_C_T	MCH	rs537557137
African	16	771108	C	A	0.657123	-0.091389	0.014698	5.2e-10	16:771108_C_A	MCH	rs56085648
African	16	796508	G	T	0.879775	0.137463	0.02697	3.52e-07	16:796508_G_T	MCH	rs182560663
African	16	817561	G	A	0.296367	0.080244	0.01851	1.48e-05	16:817561_G_A	MCH	rs536284860
African	16	82334	G	A	0.985984	0.78449	0.061003	8.3e-38	16:82334_G_A	MCH	rs35391410
African	16	83562	C	T	0.918965	0.318704	0.027909	3.63e-30	16:83562_C_T	MCH	rs2541685
African	16	85065	G	A	0.809776	-0.129588	0.020148	1.3e-10	16:85065_G_A	MCH	rs3930588
African	16	858094	A	G	0.443098	0.075004	0.01417	1.23e-07	16:858094_A_G	MCH	rs72759417
African	16	85932730	C	A	0.935456	0.013982	0.027268	0.608148	16:85932730_C_A	MCH	rs12325654
African	16	99565	G	A	0.984661	0.320578	0.056122	1.14e-08	16:99565_G_A	MCH	rs150800825
African	17	38028634	G	T	0.622438	-0.026468	0.013441	0.048953	17:38028634_G_T	MCH	rs11557467
African	19	16185559	G	A	0.900048	-0.000801	0.022978	0.972179	19:16185559_G_A	MCH	rs8109288
African	19	6802571	C	T	0.91295	-0.043849	0.023959	0.067233	19:6802571_C_T	MCH	rs8106212
African	1	100846956	T	C	0.138819	0.014631	0.025776	0.57031	1:100846956_T_C	MCH	rs565590
African	1	102502084	T	C	0.952588	-0.028348	0.032617	0.38478	1:102502084_T_C	MCH	rs12046299
African	1	103025218	T	C	0.467849	0.018061	0.013202	0.171295	1:103025218_T_C	MCH	rs1589096
African	1	106081299	A	G	0.506296	-0.018988	0.013632	0.163638	1:106081299_A_G	MCH	rs1710774
African	1	107535806	T	A	0.754787	-0.011672	0.01548	0.450854	1:107535806_T_A	MCH	rs9435338
African	1	109827253	A	G	0.491319	0.007189	0.013665	0.598846	1:109827253_A_G	MCH	rs672569
African	1	110231777	G	A	0.954108	-0.022795	0.044999	0.612478	1:110231777_G_A	MCH	rs4147565
African	1	111100498	G	A	0.850068	0.021155	0.019804	0.28542	1:111100498_G_A	MCH	rs11102131
African	1	111163693	C	T	0.77731	0.00382	0.016121	0.812672	1:111163693_C_T	MCH	rs12132073
African	1	111748488	A	G	0.903457	0.006262	0.024235	0.796093	1:111748488_A_G	MCH	rs2783440
African	1	112320846	T	G	0.387263	-0.028826	0.013875	0.037775	1:112320846_T_G	MCH	rs535183
African	1	112612098	G	A	0.60657	-0.016366	0.013636	0.230052	1:112612098_G_A	MCH	rs269127
African	1	112767483	T	C	0.478384	-0.026099	0.013963	0.061619	1:112767483_T_C	MCH	rs56693678
African	1	112824160	C	T	0.92137	-0.014703	0.025375	0.562331	1:112824160_C_T	MCH	rs4073809
African	1	112941134	G	A	0.527098	0.033665	0.013428	0.012196	1:112941134_G_A	MCH	rs2492508
African	1	113022434	A	G	0.498112	-0.011214	0.013254	0.397526	1:113022434_A_G	MCH	rs10857956
African	1	113085721	A	C	0.176067	-0.000886	0.020716	0.965859	1:113085721_A_C	MCH	rs4838959
African	1	113344299	G	A	0.512299	-0.020472	0.013749	0.136477	1:113344299_G_A	MCH	rs10745336
African	1	113874773	T	G	0.966737	-0.020282	0.036984	0.583439	1:113874773_T_G	MCH	rs1935746
African	1	114078037	A	G	0.668261	-0.020716	0.014336	0.148444	1:114078037_A_G	MCH	rs12026423
African	1	114671733	C	A	0.905757	0.017844	0.023109	0.440029	1:114671733_C_A	MCH	rs79356431
African	1	114681932	T	C	0.094374	0.112139	0.045827	0.014425	1:114681932_T_C	MCH	rs2629808
African	1	115618547	T	C	0.954043	0.012368	0.032757	0.705769	1:115618547_T_C	MCH	rs4839022
African	1	115734289	G	A	0.780169	-0.012762	0.01613	0.42883	1:115734289_G_A	MCH	rs195203
African	1	116083584	C	T	0.666577	0.000952	0.014125	0.94625	1:116083584_C_T	MCH	rs6672158
African	1	116416579	C	T	0.945073	-0.012892	0.029836	0.665688	1:116416579_C_T	MCH	rs10923690
African	1	116724459	A	G	0.498625	-0.016795	0.013168	0.202109	1:116724459_A_G	MCH	rs911221
African	1	116886547	G	T	0.489165	-0.018703	0.0134	0.162753	1:116886547_G_T	MCH	rs6701849
African	1	116923792	A	G	0.381267	-0.004009	0.013728	0.770261	1:116923792_A_G	MCH	rs6428896
African	1	117554421	A	G	0.931506	-0.01252	0.0267	0.639144	1:117554421_A_G	MCH	rs3754112
African	1	117728652	A	G	0.730282	0.022374	0.015267	0.142754	1:117728652_A_G	MCH	rs10047089
African	1	117771515	C	T	0.464264	-0.009431	0.013408	0.481823	1:117771515_C_T	MCH	rs10754343
African	1	117793269	T	A	0.37483	-0.00657	0.014472	0.649861	1:117793269_T_A	MCH	rs6428700
African	1	118126591	C	T	0.262519	-0.00127	0.016847	0.939895	1:118126591_C_T	MCH	rs861152
African	1	118282130	A	C	0.870622	0.008967	0.019516	0.645921	1:118282130_A_C	MCH	rs12137791
African	1	119054510	T	A	0.879976	-0.008667	0.02064	0.674549	1:119054510_T_A	MCH	rs7519196
African	1	119992162	C	G	0.853241	0.002728	0.019272	0.887401	1:119992162_C_G	MCH	rs12039340
African	1	120021503	T	G	0.476151	-0.002452	0.013231	0.852982	1:120021503_T_G	MCH	rs74525369
African	1	121153366	G	C	0.847539	0.02749	0.023	0.231985	1:121153366_G_C	MCH	rs2003134
African	1	121429112	C	G	0.34563	-0.019985	0.019424	0.303517	1:121429112_C_G	MCH	rs200129125
African	1	143396820	T	C	0.076465	-0.001617	0.049323	0.97383	1:143396820_T_C	MCH	rs3105533
African	1	143734242	C	T	0.8845	-0.012453	0.038008	0.743196	1:143734242_C_T	MCH	rs12132106
African	1	145554450	T	C	0.943254	-0.06661	0.029741	0.025134	1:145554450_T_C	MCH	rs12125340
African	1	145560476	G	A	0.323027	0.001604	0.014814	0.913766	1:145560476_G_A	MCH	rs10797650
African	1	146589758	C	T	0.395668	0.00184	0.013719	0.893266	1:146589758_C_T	MCH	rs750467
African	1	146817245	A	T	0.508361	0.001039	0.013005	0.936312	1:146817245_A_T	MCH	rs6693667
African	1	147003202	G	T	0.945457	0.050716	0.0311	0.102939	1:147003202_G_T	MCH	rs112530376
African	1	147013836	A	C	0.317848	-0.018059	0.014857	0.224154	1:147013836_A_C	MCH	rs594132
African	1	147056280	C	A	0.645972	-0.005428	0.014231	0.702904	1:147056280_C_A	MCH	rs628928
African	1	147220045	C	A	0.960622	-0.02152	0.033991	0.526687	1:147220045_C_A	MCH	rs12032789
African	1	147381558	G	A	0.516916	0.009486	0.015401	0.53796	1:147381558_G_A	MCH	rs2132397
African	1	147797417	G	A	0.51904	-0.014216	0.014202	0.316802	1:147797417_G_A	MCH	rs2105069
African	1	149868334	C	T	0.495627	-0.010659	0.014024	0.447234	1:149868334_C_T	MCH	rs12062387
African	1	149892872	A	G	0.894249	-0.020582	0.023002	0.370898	1:149892872_A_G	MCH	rs11205277
African	1	150047928	T	C	0.408762	-0.018184	0.013763	0.186417	1:150047928_T_C	MCH	rs10888571
African	1	150202423	A	G	0.659993	0.022328	0.014082	0.112823	1:150202423_A_G	MCH	rs11205344
African	1	150244046	G	A	0.693983	0.002614	0.014494	0.856887	1:150244046_G_A	MCH	rs73011380
African	1	150672262	T	C	0.408996	-0.021493	0.013441	0.109813	1:150672262_T_C	MCH	rs1932864
African	1	151118035	C	G	0.356952	-0.003484	0.014177	0.805863	1:151118035_C_G	MCH	rs11204782
African	1	151343545	T	C	0.869311	-0.003628	0.019984	0.855943	1:151343545_T_C	MCH	rs61818027
African	1	151445752	C	T	0.591133	-0.00368	0.01395	0.791957	1:151445752_C_T	MCH	rs10888415
African	1	151692483	A	G	0.820407	-0.014982	0.017426	0.389928	1:151692483_A_G	MCH	rs6683687
African	1	151737129	A	G	0.745975	-0.009125	0.015093	0.545477	1:151737129_A_G	MCH	rs61186168
African	1	152007599	T	C	0.717062	0.003316	0.014303	0.816664	1:152007599_T_C	MCH	rs3007676
African	1	152161103	T	G	0.404872	-0.006891	0.013584	0.612	1:152161103_T_G	MCH	rs1390489
African	1	152391282	C	A	0.590044	0.008111	0.01319	0.538637	1:152391282_C_A	MCH	rs4845766
African	1	152552285	C	A	0.834335	-0.020012	0.017462	0.25177	1:152552285_C_A	MCH	rs512208
African	1	152558146	G	A	0.878543	0.014115	0.021698	0.51537	1:152558146_G_A	MCH	rs76340524
African	1	152779534	A	T	0.859102	-0.005506	0.019514	0.777813	1:152779534_A_T	MCH	rs28649970
African	1	152887237	T	C	0.518929	-0.004371	0.01329	0.742269	1:152887237_T_C	MCH	rs6587711
African	1	152946894	A	G	0.776006	-0.01201	0.015797	0.447109	1:152946894_A_G	MCH	rs10159262
African	1	153065287	A	C	0.449803	-0.009118	0.013693	0.50548	1:153065287_A_C	MCH	rs3843257
African	1	153143504	C	G	0.533876	-0.006134	0.013576	0.651427	1:153143504_C_G	MCH	rs498131
African	1	153200987	C	T	0.874913	0.042028	0.020545	0.040808	1:153200987_C_T	MCH	rs12081567
African	1	153334077	C	A	0.789807	0.007592	0.017446	0.663468	1:153334077_C_A	MCH	rs3014869
African	1	153337943	G	A	0.910123	0.013658	0.023743	0.565159	1:153337943_G_A	MCH	rs3014874
African	1	153390542	G	C	0.590358	0.000259	0.014108	0.985336	1:153390542_G_C	MCH	rs3006412
African	1	153459023	C	T	0.58153	-0.007842	0.014032	0.576272	1:153459023_C_T	MCH	rs7535089
African	1	153530231	T	A	0.640082	0.002182	0.014281	0.878571	1:153530231_T_A	MCH	rs28689606
African	1	153630726	T	C	0.67516	0.01758	0.0143	0.218915	1:153630726_T_C	MCH	rs58379041
African	1	154044453	T	C	0.965692	-0.025847	0.046122	0.575228	1:154044453_T_C	MCH	rs113462784
African	1	154206358	T	C	0.979755	-0.095275	0.048806	0.050942	1:154206358_T_C	MCH	rs12027999
African	1	154292348	G	A	0.233125	-0.015487	0.017029	0.363108	1:154292348_G_A	MCH	rs1685606
African	1	154342517	C	T	0.95343	-0.031123	0.033899	0.358555	1:154342517_C_T	MCH	rs79438587
African	1	154407419	A	C	0.789369	-0.010424	0.016305	0.522651	1:154407419_A_C	MCH	rs7518199
African	1	154440604	T	C	0.832719	-0.007141	0.018106	0.6933	1:154440604_T_C	MCH	rs41308415
African	1	154665606	T	C	0.970686	0.093257	0.044726	0.037081	1:154665606_T_C	MCH	rs57541561
African	1	154726546	G	C	0.850342	0.017513	0.019236	0.362591	1:154726546_G_C	MCH	rs10494300
African	1	154731622	C	T	0.909803	0.030809	0.024351	0.205777	1:154731622_C_T	MCH	rs12038684
African	1	154763613	G	T	0.925631	-0.058703	0.025731	0.022547	1:154763613_G_T	MCH	rs113920303
African	1	154788815	C	T	0.754819	-0.011637	0.015681	0.458017	1:154788815_C_T	MCH	rs59517499
African	1	154822907	C	T	0.744092	-0.031624	0.01542	0.040301	1:154822907_C_T	MCH	rs906595
African	1	155008610	A	G	0.262237	-0.014422	0.015999	0.367351	1:155008610_A_G	MCH	rs4845406
African	1	155129499	A	G	0.6758	-0.008823	0.014177	0.533722	1:155129499_A_G	MCH	rs150587259
African	1	155682870	C	T	0.297032	0.018031	0.015117	0.23295	1:155682870_C_T	MCH	rs490608
African	1	156085375	T	C	0.548672	0.002325	0.013381	0.862037	1:156085375_T_C	MCH	rs547915
African	1	156184659	T	G	0.777096	0.021429	0.015864	0.176732	1:156184659_T_G	MCH	rs7530415
African	1	156247481	C	T	0.88482	0.006727	0.020315	0.740533	1:156247481_C_T	MCH	rs10908493
African	1	156361116	G	A	0.849899	-0.024591	0.018883	0.192806	1:156361116_G_A	MCH	rs73010652
African	1	156407051	T	C	0.463007	-0.023597	0.013746	0.086059	1:156407051_T_C	MCH	rs6665039
African	1	156484318	C	G	0.293984	0.000876	0.015164	0.95389	1:156484318_C_G	MCH	rs6427312
African	1	156613517	C	A	0.288257	-0.020114	0.016315	0.217605	1:156613517_C_A	MCH	rs4233511
African	1	156619135	A	T	0.245024	0.004163	0.017215	0.808895	1:156619135_A_T	MCH	rs4233512
African	1	156687576	C	T	0.277441	-0.006711	0.016894	0.691191	1:156687576_C_T	MCH	rs4661214
African	1	156819216	T	C	0.850618	-0.000975	0.019284	0.959652	1:156819216_T_C	MCH	rs74118779
African	1	156833913	A	G	0.739591	0.004056	0.016071	0.80072	1:156833913_A_G	MCH	rs74118782
African	1	156838974	C	T	0.777045	0.001308	0.016399	0.936422	1:156838974_C_T	MCH	rs61813772
African	1	157016710	C	T	0.945556	-0.033856	0.028856	0.240664	1:157016710_C_T	MCH	rs11264606
African	1	157069154	A	G	0.48069	-0.01788	0.013403	0.18217	1:157069154_A_G	MCH	rs16838075
African	1	157126453	C	G	0.937195	0.063812	0.028634	0.025865	1:157126453_C_G	MCH	rs61799686
African	1	157140430	C	A	0.81342	0.002209	0.017176	0.897663	1:157140430_C_A	MCH	rs6657979
African	1	157154912	C	G	0.735289	-0.018053	0.016337	0.269138	1:157154912_C_G	MCH	rs74119210
African	1	157275048	C	T	0.96542	-0.005103	0.03862	0.894848	1:157275048_C_T	MCH	rs12047109
African	1	157321422	C	T	0.330516	-0.017574	0.014806	0.235244	1:157321422_C_T	MCH	rs9427263
African	1	157341048	A	G	0.794345	-0.00299	0.016814	0.858848	1:157341048_A_G	MCH	rs12080330
African	1	157435230	G	A	0.515499	0.01435	0.013381	0.283515	1:157435230_G_A	MCH	rs4111874
African	1	157479006	G	A	0.976048	-0.05615	0.055272	0.309671	1:157479006_G_A	MCH	rs4110937
African	1	157485275	T	G	0.562742	0.018377	0.013035	0.158568	1:157485275_T_G	MCH	rs3811036
African	1	157541674	A	C	0.289695	0.007953	0.015277	0.602702	1:157541674_A_C	MCH	rs849819
African	1	157820033	T	C	0.887434	0.004742	0.021103	0.822209	1:157820033_T_C	MCH	rs16839297
African	1	157979035	A	G	0.688691	-0.005366	0.014364	0.708731	1:157979035_A_G	MCH	rs6680700
African	1	157991269	G	C	0.674882	-0.022363	0.014065	0.111852	1:157991269_G_C	MCH	rs11264874
African	1	158024742	A	G	0.216344	0.018895	0.018311	0.302105	1:158024742_A_G	MCH	rs7523161
African	1	158032447	T	G	0.185827	-0.021079	0.020435	0.302295	1:158032447_T_G	MCH	rs6677623
African	1	158053170	A	G	0.559116	0.000117	0.013101	0.99286	1:158053170_A_G	MCH	rs73024667
African	1	158084162	T	C	0.805675	-0.026702	0.017144	0.119333	1:158084162_T_C	MCH	rs57035221
African	1	158108284	T	A	0.597869	0.013174	0.013699	0.33619	1:158108284_T_A	MCH	rs10908624
African	1	158265973	T	C	0.768277	-0.012114	0.016015	0.449416	1:158265973_T_C	MCH	rs73023953
African	1	158365697	C	T	0.716752	0.011187	0.015328	0.465481	1:158365697_C_T	MCH	rs12405213
African	1	158398965	C	T	0.978352	-0.060754	0.046742	0.193663	1:158398965_C_T	MCH	rs144581779
African	1	158542883	G	A	0.818631	-0.027279	0.017327	0.115409	1:158542883_G_A	MCH	rs55755372
African	1	158618455	G	A	0.877901	0.027269	0.021323	0.200919	1:158618455_G_A	MCH	rs2246434
African	1	158644851	A	G	0.166171	0.021735	0.02168	0.316064	1:158644851_A_G	MCH	rs703117
African	1	158679507	A	T	0.888631	0.043072	0.020913	0.039452	1:158679507_A_T	MCH	rs434260
African	1	158701660	A	C	0.952076	0.006721	0.030463	0.825368	1:158701660_A_C	MCH	rs77800865
African	1	158785094	C	T	0.671321	0.004274	0.013813	0.757027	1:158785094_C_T	MCH	rs857786
African	1	158833656	G	T	0.123388	0.038917	0.031974	0.22353	1:158833656_G_T	MCH	rs2820126
African	1	158903759	T	G	0.368883	0.015037	0.018101	0.406137	1:158903759_T_G	MCH	rs1772397
African	1	158907751	A	C	0.966059	-0.034032	0.04045	0.400162	1:158907751_A_C	MCH	rs113812917
African	1	158912448	G	A	0.19772	-0.021901	0.019821	0.269165	1:158912448_G_A	MCH	rs856081
African	1	158950333	T	C	0.290483	-0.001142	0.015071	0.939586	1:158950333_T_C	MCH	rs856138
African	1	158980645	G	A	0.229556	0.003894	0.017217	0.821074	1:158980645_G_A	MCH	rs864439
African	1	159162922	G	A	0.691634	0.004731	0.014634	0.746488	1:159162922_G_A	MCH	rs2852717
African	1	159252040	G	T	0.928947	0.036168	0.025809	0.161085	1:159252040_G_T	MCH	rs16841975
African	1	159511202	C	T	0.480332	0.028293	0.013347	0.034042	1:159511202_C_T	MCH	rs4465205
African	1	159608533	T	C	0.798063	-0.000456	0.016507	0.977935	1:159608533_T_C	MCH	rs74122971
African	1	159737983	C	T	0.856475	-0.002278	0.019969	0.909137	1:159737983_C_T	MCH	rs10159314
African	1	159768918	C	T	0.95384	-0.013492	0.032577	0.678771	1:159768918_C_T	MCH	rs72700611
African	1	159782360	G	A	0.866687	0.01264	0.019966	0.52672	1:159782360_G_A	MCH	rs77142732
African	1	159800098	A	G	0.771872	0.008639	0.016169	0.593157	1:159800098_A_G	MCH	rs41317533
African	1	159815940	G	T	0.132865	-0.052232	0.027852	0.060757	1:159815940_G_T	MCH	rs2501353
African	1	159818817	T	C	0.872351	-0.009727	0.022145	0.660521	1:159818817_T_C	MCH	rs2501345
African	1	159884207	G	C	0.748489	0.00994	0.015862	0.530874	1:159884207_G_C	MCH	rs12067321
African	1	159927907	T	C	0.735914	-0.016829	0.015282	0.270754	1:159927907_T_C	MCH	rs12144158
African	1	160009121	A	C	0.397706	0.001791	0.014018	0.898342	1:160009121_A_C	MCH	rs1053074
African	1	160038698	G	A	0.871712	0.009283	0.021059	0.659383	1:160038698_G_A	MCH	rs80298170
African	1	160125463	T	C	0.775094	-0.00355	0.016509	0.829712	1:160125463_T_C	MCH	rs16831449
African	1	160145688	C	G	0.219398	0.021701	0.01727	0.208874	1:160145688_C_G	MCH	rs1884996
African	1	160158031	G	A	0.827437	0.012476	0.018676	0.504151	1:160158031_G_A	MCH	rs76138322
African	1	160162872	A	G	0.867433	0.014811	0.019771	0.453808	1:160162872_A_G	MCH	rs617698
African	1	160206394	G	A	0.746465	-0.015383	0.015097	0.308233	1:160206394_G_A	MCH	rs9633341
African	1	160489974	A	G	0.358593	0.002383	0.014015	0.864947	1:160489974_A_G	MCH	rs3845627
African	1	160651728	A	G	0.724253	-0.018694	0.016068	0.244641	1:160651728_A_G	MCH	rs16832311
African	1	160666350	A	G	0.352218	0.000377	0.014638	0.979463	1:160666350_A_G	MCH	rs504716
African	1	160729163	G	C	0.976135	0.011588	0.04739	0.806813	1:160729163_G_C	MCH	rs11265475
African	1	160736598	T	C	0.303606	0.038408	0.015102	0.011004	1:160736598_T_C	MCH	rs492484
African	1	160773029	G	A	0.904155	0.006597	0.022455	0.768927	1:160773029_G_A	MCH	rs1961611
African	1	161225699	G	C	0.870981	0.002758	0.02094	0.895179	1:161225699_G_C	MCH	rs543799247
African	1	161475750	G	A	0.975085	0.037183	0.044579	0.404233	1:161475750_G_A	MCH	rs10494360
African	1	161481546	T	C	0.820553	-0.005045	0.018568	0.785831	1:161481546_T_C	MCH	rs114926793
African	1	161567067	T	A	0.554547	-0.007541	0.015192	0.619661	1:161567067_T_A	MCH	rs61801824
African	1	161595730	C	A	0.722994	-0.012082	0.01705	0.47857	1:161595730_C_A	MCH	rs143596860
African	1	161698125	C	T	0.892116	-0.031424	0.021165	0.137611	1:161698125_C_T	MCH	rs113563530
African	1	161708194	T	G	0.719855	0.015222	0.014997	0.310085	1:161708194_T_G	MCH	rs10799941
African	1	162061209	C	T	0.673505	0.024843	0.014074	0.07753	1:162061209_C_T	MCH	rs16851902
African	1	162177803	G	A	0.310002	-0.012422	0.014742	0.399443	1:162177803_G_A	MCH	rs4656359
African	1	162322803	G	A	0.750851	-0.004933	0.01585	0.75562	1:162322803_G_A	MCH	rs1848843
African	1	162335256	C	T	0.576804	0.001469	0.013413	0.912768	1:162335256_C_T	MCH	rs348624
African	1	162367874	G	T	0.972759	-0.024225	0.04147	0.559141	1:162367874_G_T	MCH	rs61809468
African	1	162446878	G	A	0.710634	0.015033	0.01531	0.326128	1:162446878_G_A	MCH	rs469951
African	1	162606728	T	C	0.73962	0.01226	0.0151	0.416854	1:162606728_T_C	MCH	rs4656375
African	1	162650763	G	A	0.698617	0.037125	0.01436	0.009747	1:162650763_G_A	MCH	rs72709727
African	1	162827240	T	G	0.786105	-0.009939	0.016203	0.539625	1:162827240_T_G	MCH	rs11585029
African	1	162852760	C	T	0.504151	0.006118	0.013149	0.641741	1:162852760_C_T	MCH	rs4657233
African	1	162929447	G	T	0.143256	-0.004589	0.025159	0.85524	1:162929447_G_T	MCH	rs10732281
African	1	162970868	A	T	0.913049	0.011595	0.025853	0.653804	1:162970868_A_T	MCH	rs112616660
African	1	163072899	G	A	0.90079	-0.022009	0.021966	0.316363	1:163072899_G_A	MCH	rs2661299
African	1	163123382	G	A	0.865533	0.005144	0.01935	0.790363	1:163123382_G_A	MCH	rs6664123
African	1	163216705	A	G	0.896016	0.027379	0.023029	0.234469	1:163216705_A_G	MCH	rs2814369
African	1	163217392	G	A	0.973408	-0.058608	0.045554	0.198232	1:163217392_G_A	MCH	rs114466359
African	1	163241577	G	A	0.925471	-0.005204	0.025207	0.83642	1:163241577_G_A	MCH	rs61812168
African	1	163345829	C	T	0.896739	-0.022699	0.023684	0.337851	1:163345829_C_T	MCH	rs10917739
African	1	163513839	G	A	0.876732	0.037879	0.023726	0.11037	1:163513839_G_A	MCH	rs12067389
African	1	163579955	T	C	0.935395	-0.023049	0.029381	0.432773	1:163579955_T_C	MCH	rs2791149
African	1	163590197	T	C	0.837531	0.00796	0.018239	0.662561	1:163590197_T_C	MCH	rs7541708
African	1	163855599	C	T	0.559051	-0.018047	0.013314	0.175255	1:163855599_C_T	MCH	rs7520589
African	1	164068531	C	T	0.860098	-0.017208	0.019254	0.371456	1:164068531_C_T	MCH	rs12139028
African	1	164392501	A	G	0.542177	-0.001766	0.013022	0.892088	1:164392501_A_G	MCH	rs2821398
African	1	164492154	C	T	0.926677	0.006313	0.025532	0.804701	1:164492154_C_T	MCH	rs12402920
African	1	164540861	A	G	0.466953	-0.00971	0.014344	0.498442	1:164540861_A_G	MCH	rs200773115
African	1	164609305	T	C	0.400639	-0.016971	0.014542	0.243164	1:164609305_T_C	MCH	rs1780349
African	1	164735436	G	T	0.421352	0.0157	0.013743	0.25328	1:164735436_G_T	MCH	rs1780360
African	1	164764500	G	A	0.844947	0.051768	0.018353	0.004806	1:164764500_G_A	MCH	rs4657375
African	1	164934507	T	G	0.414382	-0.01197	0.013757	0.384231	1:164934507_T_G	MCH	rs1361843
African	1	165117049	T	C	0.164325	0.005349	0.021657	0.804894	1:165117049_T_C	MCH	rs4657405
African	1	165189595	G	A	0.972961	0.05157	0.042296	0.222728	1:165189595_G_A	MCH	rs61800524
African	1	165196183	T	C	0.343962	-0.012451	0.014495	0.390341	1:165196183_T_C	MCH	rs2221418
African	1	165393753	G	T	0.743395	-0.001374	0.01511	0.927526	1:165393753_G_T	MCH	rs3753896
African	1	165562982	C	T	0.755085	-0.037764	0.015234	0.013195	1:165562982_C_T	MCH	rs1538116
African	1	165605310	A	G	0.221689	0.000825	0.017315	0.961995	1:165605310_A_G	MCH	rs10800120
African	1	165743761	G	C	0.778716	-0.012984	0.016261	0.424599	1:165743761_G_C	MCH	rs61800457
African	1	166640635	T	C	0.600329	-0.005266	0.013294	0.692052	1:166640635_T_C	MCH	rs472293
African	1	166976836	A	G	0.425209	-0.001133	0.013483	0.933024	1:166976836_A_G	MCH	rs66805418
African	1	167164887	A	G	0.43174	0.009355	0.014133	0.508032	1:167164887_A_G	MCH	rs3931265
African	1	167420425	T	G	0.887612	-0.018763	0.020695	0.36457	1:167420425_T_G	MCH	rs2056626
African	1	167667620	C	T	0.426636	0.000252	0.013746	0.985388	1:167667620_C_T	MCH	rs13374598
African	1	168355541	C	G	0.230798	-0.010576	0.017824	0.552954	1:168355541_C_G	MCH	rs909638
African	1	172332009	A	G	0.682563	-0.02172	0.014457	0.132982	1:172332009_A_G	MCH	rs979935
African	1	173163568	A	G	0.230616	0.031093	0.01706	0.068379	1:173163568_A_G	MCH	rs7518129
African	1	174242805	G	A	0.310366	-0.025467	0.014752	0.0843	1:174242805_G_A	MCH	rs10912754
African	1	178097515	G	A	0.71941	-0.002971	0.014976	0.842721	1:178097515_G_A	MCH	rs451341
African	1	43771880	G	A	0.965804	0.044566	0.037347	0.232738	1:43771880_G_A	MCH	rs74069551
African	1	94980123	G	A	0.950118	0.017433	0.031244	0.576896	1:94980123_G_A	MCH	rs72729511
African	2	135777869	G	A	0.974726	-0.007093	0.042511	0.867472	2:135777869_G_A	MCH	rs140516485
African	2	182308352	A	G	0.380752	-0.005511	0.013718	0.687881	2:182308352_A_G	MCH	rs6740847
African	2	182318491	G	A	0.859019	-0.00587	0.018958	0.756863	2:182318491_G_A	MCH	rs72894360
African	2	46308680	A	G	0.24244	-0.007172	0.017254	0.677694	2:46308680_A_G	MCH	rs11690784
African	3	128330526	T	C	0.386933	-0.015803	0.013403	0.238368	3:128330526_T_C	MCH	rs67445542
African	3	183857545	C	G	0.920098	0.017384	0.025022	0.487223	3:183857545_C_G	MCH	rs141985150
African	3	184094724	T	C	0.801548	-0.002157	0.016447	0.895645	3:184094724_T_C	MCH	rs13084750
African	3	56849749	T	C	0.758316	0.007864	0.015459	0.610983	3:56849749_T_C	MCH	rs1354034
African	5	95162889	G	A	0.947208	0.155384	0.029342	1.21e-07	5:95162889_G_A	MCH	rs4869251
African	6	135419018	T	C	0.94796	-0.173087	0.03014	9.56e-09	6:135419018_T_C	MCH	rs9399137
African	6	139831180	G	A	0.552567	0.070414	0.013041	6.83e-08	6:139831180_G_A	MCH	rs679582
African	6	143558736	T	A	0.963063	-0.05515	0.035909	0.12457	6:143558736_T_A	MCH	rs73594114
African	6	33482146	C	G	0.420618	-0.0185	0.013582	0.173168	6:33482146_C_G	MCH	rs210194
African	7	106366781	G	A	0.504434	-0.007855	0.013104	0.548885	7:106366781_G_A	MCH	rs10278865
African	7	28711319	G	A	0.860051	-0.013696	0.020784	0.50994	7:28711319_G_A	MCH	rs73304938
African	7	80219147	G	C	0.799659	0.03659	0.016394	0.02564	7:80219147_G_C	MCH	rs79957681
African	7	92387918	T	C	0.836376	0.029771	0.017748	0.09346	7:92387918_T_C	MCH	rs6970319
African	8	130602281	A	C	0.500001	0.008447	0.013331	0.526318	8:130602281_A_C	MCH	rs10103048
African	8	86154040	A	G	0.900986	-0.018652	0.021918	0.394777	8:86154040_A_G	MCH	rs75562449
African	9	91505937	G	A	0.840632	-0.014678	0.018278	0.421952	9:91505937_G_A	MCH	rs12345705
African	10	64862314	T	G	0.571439	-0.010824	0.012945	0.403061	10:64862314_T_G	MCHC	rs4363488
African	11	3953878	C	T	0.974723	-0.024917	0.040951	0.54291	11:3953878_C_T	MCHC	rs112706563
African	11	4947734	T	G	0.975386	-0.285623	0.041845	9.07e-12	11:4947734_T_G	MCHC	rs59618482
African	11	5214857	A	G	0.449087	-0.007104	0.013273	0.592504	11:5214857_A_G	MCHC	rs7482866
African	11	5259768	A	G	0.716564	0.035485	0.014637	0.015357	11:5259768_A_G	MCHC	rs10488681
African	11	5306996	C	T	0.961525	-0.23552	0.034444	8.35e-12	11:5306996_C_T	MCHC	rs112915912
African	11	63698035	T	A	0.373143	0.001096	0.013468	0.935132	11:63698035_T_A	MCHC	rs11231642
African	12	111843000	T	C	0.864971	0.011615	0.018764	0.535919	12:111843000_T_C	MCHC	rs114985662
African	13	113969390	T	C	0.512053	-0.019083	0.013204	0.148376	13:113969390_T_C	MCHC	rs7326696
African	14	64692465	T	C	0.469786	-0.010961	0.012849	0.393622	14:64692465_T_C	MCHC	rs1048315
African	16	108585	T	C	0.122403	0.108338	0.028581	0.000152	16:108585_T_C	MCHC	rs216598
African	16	130429	G	C	0.957996	0.155717	0.032932	2.3e-06	16:130429_G_C	MCHC	rs3176399
African	16	136142	C	T	0.133319	0.1318	0.025129	1.6e-07	16:136142_C_T	MCHC	rs2541623
African	16	143503	C	T	0.890448	-0.091582	0.021073	1.41e-05	16:143503_C_T	MCHC	rs6600233
African	16	174926	A	C	0.882136	-0.123817	0.019764	3.85e-10	16:174926_A_C	MCHC	rs34291820
African	16	2028402	A	C	0.401323	0.020667	0.013627	0.129361	16:2028402_A_C	MCHC	rs8460
African	16	207373	A	T	0.95498	-0.160309	0.032999	1.21e-06	16:207373_A_T	MCHC	rs538965378
African	16	225185	A	G	0.984784	0.424585	0.063205	1.91e-11	16:225185_A_G	MCHC	rs555255920
African	16	3004161	T	A	0.165404	0.06455	0.020913	0.002033	16:3004161_T_A	MCHC	rs4785921
African	16	304514	C	T	0.867113	-0.10538	0.018887	2.47e-08	16:304514_C_T	MCHC	rs3213508
African	16	319822	G	C	0.983461	0.465272	0.056611	2.16e-16	16:319822_G_C	MCHC	rs112877257
African	16	321754	T	G	0.96591	-0.117332	0.040514	0.00379	16:321754_T_G	MCHC	rs183388202
African	16	324479	C	G	0.779011	0.251609	0.018542	6.64e-42	16:324479_C_G	MCHC	rs3752435
African	16	326773	A	G	0.755095	0.146098	0.019092	2.06e-14	16:326773_A_G	MCHC	rs73486221
African	16	336071	A	T	0.978171	0.356227	0.074217	1.62e-06	16:336071_A_T	MCHC	rs546817919
African	16	360148	C	T	0.862801	-0.065755	0.018783	0.000467	16:360148_C_T	MCHC	rs55931984
African	16	408299	C	T	0.962593	0.184591	0.035148	1.54e-07	16:408299_C_T	MCHC	rs77621702
African	16	418154	G	C	0.96682	-0.154847	0.042105	0.000237	16:418154_G_C	MCHC	rs150051846
African	16	4473077	T	C	0.82607	-0.053582	0.017171	0.001813	16:4473077_T_C	MCHC	rs3948237
African	16	449659	G	A	0.439361	-0.056678	0.013347	2.2e-05	16:449659_G_A	MCHC	rs14293
African	16	450759	C	G	0.259315	0.086189	0.016159	9.83e-08	16:450759_C_G	MCHC	rs407983
African	16	617757	A	G	0.968646	0.279735	0.040549	5.45e-12	16:617757_A_G	MCHC	rs115165076
African	16	66679	T	C	0.724497	-0.096898	0.026875	0.000314	16:66679_T_C	MCHC	rs575317242
African	16	68704	C	T	0.966401	0.393997	0.064295	9.17e-10	16:68704_C_T	MCHC	rs537557137
African	16	771108	C	A	0.658782	-0.082425	0.014201	6.64e-09	16:771108_C_A	MCHC	rs56085648
African	16	796508	G	T	0.879775	0.060387	0.026958	0.025109	16:796508_G_T	MCHC	rs182560663
African	16	817561	G	A	0.296367	0.044534	0.018495	0.016065	16:817561_G_A	MCHC	rs536284860
African	16	82334	G	A	0.985984	0.570457	0.061159	1.15e-20	16:82334_G_A	MCHC	rs35391410
African	16	83562	C	T	0.918965	0.220832	0.027979	3.1e-15	16:83562_C_T	MCHC	rs2541685
African	16	85065	G	A	0.811526	-0.099696	0.019303	2.46e-07	16:85065_G_A	MCHC	rs3930588
African	16	858094	A	G	0.444358	0.045418	0.013737	0.000951	16:858094_A_G	MCHC	rs72759417
African	16	85932730	C	A	0.93581	-0.01677	0.02646	0.526249	16:85932730_C_A	MCHC	rs12325654
African	16	99565	G	A	0.984661	0.194965	0.056124	0.000516	16:99565_G_A	MCHC	rs150800825
African	17	38028634	G	T	0.622059	-0.004227	0.013003	0.745133	17:38028634_G_T	MCHC	rs11557467
African	19	16185559	G	A	0.900632	0.024104	0.022351	0.280813	19:16185559_G_A	MCHC	rs8109288
African	19	6802571	C	T	0.91295	-0.03086	0.023944	0.197447	19:6802571_C_T	MCHC	rs8106212
African	1	100846956	T	C	0.137377	0.031305	0.024469	0.200749	1:100846956_T_C	MCHC	rs565590
African	1	102502084	T	C	0.948624	0.044234	0.030305	0.144374	1:102502084_T_C	MCHC	rs12046299
African	1	103025218	T	C	0.463171	0.014934	0.012763	0.241954	1:103025218_T_C	MCHC	rs1589096
African	1	106081299	A	G	0.503431	0.017345	0.01319	0.188482	1:106081299_A_G	MCHC	rs1710774
African	1	107535806	T	A	0.749811	0.000728	0.014884	0.960997	1:107535806_T_A	MCHC	rs9435338
African	1	109827253	A	G	0.488826	0.032507	0.01323	0.014025	1:109827253_A_G	MCHC	rs672569
African	1	110231777	G	A	0.954108	-0.030041	0.044958	0.504022	1:110231777_G_A	MCHC	rs4147565
African	1	111100498	G	A	0.84668	0.022559	0.018956	0.233998	1:111100498_G_A	MCHC	rs11102131
African	1	111163693	C	T	0.774362	0.012747	0.015466	0.409835	1:111163693_C_T	MCHC	rs12132073
African	1	111748488	A	G	0.901541	0.0221	0.023292	0.342701	1:111748488_A_G	MCHC	rs2783440
African	1	112320846	T	G	0.38835	-0.031249	0.013402	0.019737	1:112320846_T_G	MCHC	rs535183
African	1	112612098	G	A	0.610316	-0.017881	0.013164	0.17436	1:112612098_G_A	MCHC	rs269127
African	1	112767483	T	C	0.478384	-0.013907	0.013942	0.318487	1:112767483_T_C	MCHC	rs56693678
African	1	112824160	C	T	0.921235	-0.02345	0.024427	0.337056	1:112824160_C_T	MCHC	rs4073809
African	1	112941134	G	A	0.531748	0.00199	0.012956	0.877894	1:112941134_G_A	MCHC	rs2492508
African	1	113022434	A	G	0.500113	-0.01998	0.01283	0.119406	1:113022434_A_G	MCHC	rs10857956
African	1	113085721	A	C	0.174935	0.008281	0.019745	0.674966	1:113085721_A_C	MCHC	rs4838959
African	1	113344299	G	A	0.509388	-0.010615	0.013281	0.424128	1:113344299_G_A	MCHC	rs10745336
African	1	113874773	T	G	0.966027	0.064303	0.035386	0.069193	1:113874773_T_G	MCHC	rs1935746
African	1	114078037	A	G	0.665499	-0.01469	0.013834	0.288287	1:114078037_A_G	MCHC	rs12026423
African	1	114671733	C	A	0.90518	0.002298	0.022211	0.917577	1:114671733_C_A	MCHC	rs79356431
African	1	114681932	T	C	0.090986	0.103746	0.043099	0.0161	1:114681932_T_C	MCHC	rs2629808
African	1	115618547	T	C	0.95332	0.070328	0.03136	0.024946	1:115618547_T_C	MCHC	rs4839022
African	1	115734289	G	A	0.777664	-0.013589	0.015462	0.37947	1:115734289_G_A	MCHC	rs195203
African	1	116083584	C	T	0.668115	-0.01119	0.01368	0.413358	1:116083584_C_T	MCHC	rs6672158
African	1	116416579	C	T	0.943871	0.009519	0.028523	0.738602	1:116416579_C_T	MCHC	rs10923690
African	1	116724459	A	G	0.502705	-0.034113	0.012717	0.007327	1:116724459_A_G	MCHC	rs911221
African	1	116886547	G	T	0.493	-0.021268	0.012956	0.100668	1:116886547_G_T	MCHC	rs6701849
African	1	116923792	A	G	0.384795	-0.004931	0.013206	0.708879	1:116923792_A_G	MCHC	rs6428896
African	1	117554421	A	G	0.927451	-0.023233	0.025442	0.361148	1:117554421_A_G	MCHC	rs3754112
African	1	117728652	A	G	0.728293	0.018794	0.014725	0.201828	1:117728652_A_G	MCHC	rs10047089
African	1	117771515	C	T	0.461888	-0.003286	0.012993	0.800335	1:117771515_C_T	MCHC	rs10754343
African	1	117793269	T	A	0.377906	-0.00545	0.013938	0.695826	1:117793269_T_A	MCHC	rs6428700
African	1	118126591	C	T	0.262469	-0.008004	0.016239	0.622124	1:118126591_C_T	MCHC	rs861152
African	1	118282130	A	C	0.868431	0.020486	0.018743	0.274368	1:118282130_A_C	MCHC	rs12137791
African	1	119054510	T	A	0.87594	0.000924	0.01961	0.962404	1:119054510_T_A	MCHC	rs7519196
African	1	119992162	C	G	0.850065	0.023015	0.018459	0.212443	1:119992162_C_G	MCHC	rs12039340
African	1	120021503	T	G	0.481949	0.008687	0.012805	0.497534	1:120021503_T_G	MCHC	rs74525369
African	1	121153366	G	C	0.846455	0.009753	0.02196	0.656961	1:121153366_G_C	MCHC	rs2003134
African	1	121429112	C	G	0.34563	-0.013685	0.019392	0.480398	1:121429112_C_G	MCHC	rs200129125
African	1	143396820	T	C	0.076465	0.023208	0.049219	0.637289	1:143396820_T_C	MCHC	rs3105533
African	1	143734242	C	T	0.8845	-0.016039	0.037928	0.672402	1:143734242_C_T	MCHC	rs12132106
African	1	145554450	T	C	0.941247	-0.030725	0.028419	0.27962	1:145554450_T_C	MCHC	rs12125340
African	1	145560476	G	A	0.324293	-0.002947	0.014259	0.836224	1:145560476_G_A	MCHC	rs10797650
African	1	146589758	C	T	0.397949	-0.001465	0.013243	0.911866	1:146589758_C_T	MCHC	rs750467
African	1	146817245	A	T	0.505591	0.011568	0.01259	0.358179	1:146817245_A_T	MCHC	rs6693667
African	1	147003202	G	T	0.94362	0.048857	0.029608	0.098911	1:147003202_G_T	MCHC	rs112530376
African	1	147013836	A	C	0.318699	-0.013583	0.014312	0.342591	1:147013836_A_C	MCHC	rs594132
African	1	147056280	C	A	0.640338	0.011392	0.013702	0.405765	1:147056280_C_A	MCHC	rs628928
African	1	147220045	C	A	0.958733	0.001832	0.032154	0.954547	1:147220045_C_A	MCHC	rs12032789
African	1	147381558	G	A	0.516493	0.007696	0.014699	0.600599	1:147381558_G_A	MCHC	rs2132397
African	1	147797417	G	A	0.516673	-0.01766	0.013658	0.195981	1:147797417_G_A	MCHC	rs2105069
African	1	149868334	C	T	0.497348	-0.017703	0.013472	0.188794	1:149868334_C_T	MCHC	rs12062387
African	1	149892872	A	G	0.892702	0.003819	0.0219	0.861536	1:149892872_A_G	MCHC	rs11205277
African	1	150047928	T	C	0.406498	-0.008606	0.013313	0.518015	1:150047928_T_C	MCHC	rs10888571
African	1	150202423	A	G	0.662445	-0.003098	0.013642	0.820365	1:150202423_A_G	MCHC	rs11205344
African	1	150244046	G	A	0.695891	-0.004054	0.014066	0.773193	1:150244046_G_A	MCHC	rs73011380
African	1	150672262	T	C	0.406527	-0.012573	0.01302	0.334182	1:150672262_T_C	MCHC	rs1932864
African	1	151118035	C	G	0.357738	-0.003614	0.013666	0.791444	1:151118035_C_G	MCHC	rs11204782
African	1	151343545	T	C	0.867176	0.016445	0.019288	0.393881	1:151343545_T_C	MCHC	rs61818027
African	1	151445752	C	T	0.587706	-0.013576	0.013508	0.314854	1:151445752_C_T	MCHC	rs10888415
African	1	151692483	A	G	0.817629	-0.016522	0.016773	0.32459	1:151692483_A_G	MCHC	rs6683687
African	1	151737129	A	G	0.747177	-0.011846	0.014653	0.418852	1:151737129_A_G	MCHC	rs61186168
African	1	152007599	T	C	0.71844	6e-06	0.013855	0.999627	1:152007599_T_C	MCHC	rs3007676
African	1	152161103	T	G	0.402118	0.003873	0.01312	0.767843	1:152161103_T_G	MCHC	rs1390489
African	1	152391282	C	A	0.5876	0.0029	0.012754	0.820114	1:152391282_C_A	MCHC	rs4845766
African	1	152552285	C	A	0.832301	-0.002638	0.0168	0.875204	1:152552285_C_A	MCHC	rs512208
African	1	152558146	G	A	0.87643	-0.016691	0.020815	0.422626	1:152558146_G_A	MCHC	rs76340524
African	1	152779534	A	T	0.859102	0.00463	0.019511	0.81241	1:152779534_A_T	MCHC	rs28649970
African	1	152887237	T	C	0.521197	-0.006375	0.012848	0.619817	1:152887237_T_C	MCHC	rs6587711
African	1	152946894	A	G	0.777739	-0.005005	0.015328	0.74406	1:152946894_A_G	MCHC	rs10159262
African	1	153065287	A	C	0.450646	-0.009112	0.013195	0.489864	1:153065287_A_C	MCHC	rs3843257
African	1	153143504	C	G	0.535543	0.012848	0.013152	0.328613	1:153143504_C_G	MCHC	rs498131
African	1	153200987	C	T	0.873312	0.026625	0.019782	0.178306	1:153200987_C_T	MCHC	rs12081567
African	1	153334077	C	A	0.791959	-0.014075	0.016827	0.402908	1:153334077_C_A	MCHC	rs3014869
African	1	153337943	G	A	0.908201	0.038175	0.022996	0.0969	1:153337943_G_A	MCHC	rs3014874
African	1	153390542	G	C	0.590358	-0.004837	0.014093	0.731429	1:153390542_G_C	MCHC	rs3006412
African	1	153459023	C	T	0.578462	0.010022	0.013548	0.459483	1:153459023_C_T	MCHC	rs7535089
African	1	153530231	T	A	0.64146	0.027122	0.013807	0.049507	1:153530231_T_A	MCHC	rs28689606
African	1	153630726	T	C	0.67516	0.010186	0.014286	0.475845	1:153630726_T_C	MCHC	rs58379041
African	1	154044453	T	C	0.965692	0.019868	0.046062	0.666245	1:154044453_T_C	MCHC	rs113462784
African	1	154206358	T	C	0.978851	-0.001888	0.04582	0.967113	1:154206358_T_C	MCHC	rs12027999
African	1	154292348	G	A	0.232304	-0.007871	0.016393	0.631136	1:154292348_G_A	MCHC	rs1685606
African	1	154342517	C	T	0.95279	-0.036987	0.032791	0.259313	1:154342517_C_T	MCHC	rs79438587
African	1	154407419	A	C	0.787005	-0.002408	0.01571	0.878137	1:154407419_A_C	MCHC	rs7518199
African	1	154440604	T	C	0.834825	-0.009925	0.017661	0.574169	1:154440604_T_C	MCHC	rs41308415
African	1	154665606	T	C	0.968904	0.096167	0.042834	0.024784	1:154665606_T_C	MCHC	rs57541561
African	1	154726546	G	C	0.847885	0.029967	0.018554	0.106275	1:154726546_G_C	MCHC	rs10494300
African	1	154731622	C	T	0.908216	0.057051	0.023449	0.014996	1:154731622_C_T	MCHC	rs12038684
African	1	154763613	G	T	0.923267	-0.080299	0.02463	0.001119	1:154763613_G_T	MCHC	rs113920303
African	1	154788815	C	T	0.754784	-0.020986	0.015191	0.167104	1:154788815_C_T	MCHC	rs59517499
African	1	154822907	C	T	0.742674	-0.017813	0.014872	0.231006	1:154822907_C_T	MCHC	rs906595
African	1	155008610	A	G	0.260773	-0.022197	0.01543	0.150255	1:155008610_A_G	MCHC	rs4845406
African	1	155129499	A	G	0.678103	0.003971	0.013742	0.772619	1:155129499_A_G	MCHC	rs150587259
African	1	155682870	C	T	0.297915	0.000477	0.014529	0.973776	1:155682870_C_T	MCHC	rs490608
African	1	156085375	T	C	0.545228	0.011629	0.012936	0.368643	1:156085375_T_C	MCHC	rs547915
African	1	156184659	T	G	0.779278	0.008936	0.0154	0.561766	1:156184659_T_G	MCHC	rs7530415
African	1	156247481	C	T	0.883748	0.02233	0.01961	0.254803	1:156247481_C_T	MCHC	rs10908493
African	1	156361116	G	A	0.850862	-0.020267	0.018333	0.26892	1:156361116_G_A	MCHC	rs73010652
African	1	156407051	T	C	0.463814	-0.018082	0.013249	0.172309	1:156407051_T_C	MCHC	rs6665039
African	1	156484318	C	G	0.295471	0.017253	0.014627	0.238171	1:156484318_C_G	MCHC	rs6427312
African	1	156613517	C	A	0.28594	3.6e-05	0.015783	0.998182	1:156613517_C_A	MCHC	rs4233511
African	1	156619135	A	T	0.244585	-0.02357	0.016548	0.154332	1:156619135_A_T	MCHC	rs4233512
African	1	156687576	C	T	0.274088	0.010736	0.016375	0.512104	1:156687576_C_T	MCHC	rs4661214
African	1	156819216	T	C	0.851985	-0.019157	0.018842	0.30927	1:156819216_T_C	MCHC	rs74118779
African	1	156833913	A	G	0.742581	0.013808	0.015657	0.377832	1:156833913_A_G	MCHC	rs74118782
African	1	156838974	C	T	0.777814	-0.009283	0.015909	0.559566	1:156838974_C_T	MCHC	rs61813772
African	1	157016710	C	T	0.943857	-0.003953	0.027526	0.885791	1:157016710_C_T	MCHC	rs11264606
African	1	157069154	A	G	0.482196	-0.004241	0.012975	0.743766	1:157069154_A_G	MCHC	rs16838075
African	1	157126453	C	G	0.936322	0.056738	0.027457	0.038805	1:157126453_C_G	MCHC	rs61799686
African	1	157140430	C	A	0.813285	-0.024521	0.016579	0.13912	1:157140430_C_A	MCHC	rs6657979
African	1	157154912	C	G	0.73769	-0.034421	0.015909	0.030515	1:157154912_C_G	MCHC	rs74119210
African	1	157275048	C	T	0.964471	0.010117	0.036711	0.782858	1:157275048_C_T	MCHC	rs12047109
African	1	157321422	C	T	0.328786	-0.010344	0.014323	0.470157	1:157321422_C_T	MCHC	rs9427263
African	1	157341048	A	G	0.795599	4.3e-05	0.016333	0.997922	1:157341048_A_G	MCHC	rs12080330
African	1	157435230	G	A	0.514969	0.017317	0.012994	0.182599	1:157435230_G_A	MCHC	rs4111874
African	1	157479006	G	A	0.976048	-0.052519	0.055273	0.342011	1:157479006_G_A	MCHC	rs4110937
African	1	157485275	T	G	0.565533	0.014197	0.012667	0.262355	1:157485275_T_G	MCHC	rs3811036
African	1	157541674	A	C	0.290823	0.002052	0.014654	0.888616	1:157541674_A_C	MCHC	rs849819
African	1	157820033	T	C	0.887896	0.0048	0.020455	0.814463	1:157820033_T_C	MCHC	rs16839297
African	1	157979035	A	G	0.690025	0.000105	0.013955	0.993998	1:157979035_A_G	MCHC	rs6680700
African	1	157991269	G	C	0.678228	-0.024654	0.013647	0.070842	1:157991269_G_C	MCHC	rs11264874
African	1	158024742	A	G	0.21167	0.014277	0.017872	0.424377	1:158024742_A_G	MCHC	rs7523161
African	1	158032447	T	G	0.183032	-0.042794	0.019665	0.029563	1:158032447_T_G	MCHC	rs6677623
African	1	158053170	A	G	0.561602	-0.000456	0.01271	0.97138	1:158053170_A_G	MCHC	rs73024667
African	1	158084162	T	C	0.806959	-0.0367	0.016676	0.027774	1:158084162_T_C	MCHC	rs57035221
African	1	158108284	T	A	0.599454	-0.012573	0.013219	0.341508	1:158108284_T_A	MCHC	rs10908624
African	1	158265973	T	C	0.770016	-0.003871	0.01552	0.803019	1:158265973_T_C	MCHC	rs73023953
African	1	158365697	C	T	0.717953	0.019063	0.014816	0.198208	1:158365697_C_T	MCHC	rs12405213
African	1	158398965	C	T	0.978188	-0.00459	0.04502	0.918763	1:158398965_C_T	MCHC	rs144581779
African	1	158542883	G	A	0.819498	-0.011819	0.016786	0.481375	1:158542883_G_A	MCHC	rs55755372
African	1	158618455	G	A	0.877369	0.056615	0.02049	0.005742	1:158618455_G_A	MCHC	rs2246434
African	1	158644851	A	G	0.161458	0.044873	0.02105	0.033049	1:158644851_A_G	MCHC	rs703117
African	1	158679507	A	T	0.888631	0.029282	0.020893	0.161042	1:158679507_A_T	MCHC	rs434260
African	1	158701660	A	C	0.950987	-0.036103	0.029211	0.216454	1:158701660_A_C	MCHC	rs77800865
African	1	158785094	C	T	0.671437	0.006231	0.013377	0.641392	1:158785094_C_T	MCHC	rs857786
African	1	158833656	G	T	0.121261	-0.009449	0.030308	0.75522	1:158833656_G_T	MCHC	rs2820126
African	1	158903759	T	G	0.368883	0.019356	0.018092	0.284667	1:158903759_T_G	MCHC	rs1772397
African	1	158907751	A	C	0.964941	-0.007458	0.038699	0.847177	1:158907751_A_C	MCHC	rs113812917
African	1	158912448	G	A	0.193188	-0.006822	0.019177	0.722054	1:158912448_G_A	MCHC	rs856081
African	1	158950333	T	C	0.285078	-0.006712	0.014645	0.646757	1:158950333_T_C	MCHC	rs856138
African	1	158980645	G	A	0.225729	0.003346	0.016742	0.841581	1:158980645_G_A	MCHC	rs864439
African	1	159162922	G	A	0.693119	0.006548	0.014167	0.643976	1:159162922_G_A	MCHC	rs2852717
African	1	159252040	G	T	0.928988	0.017455	0.025007	0.485175	1:159252040_G_T	MCHC	rs16841975
African	1	159511202	C	T	0.476761	0.021991	0.012918	0.088686	1:159511202_C_T	MCHC	rs4465205
African	1	159608533	T	C	0.799785	0.006154	0.016041	0.701236	1:159608533_T_C	MCHC	rs74122971
African	1	159737983	C	T	0.859145	-0.001916	0.019555	0.921915	1:159737983_C_T	MCHC	rs10159314
African	1	159768918	C	T	0.95341	-0.022319	0.03138	0.476946	1:159768918_C_T	MCHC	rs72700611
African	1	159782360	G	A	0.868156	0.013258	0.019461	0.49573	1:159782360_G_A	MCHC	rs77142732
African	1	159800098	A	G	0.773555	-0.000702	0.015832	0.964635	1:159800098_A_G	MCHC	rs41317533
African	1	159815940	G	T	0.129518	-0.027127	0.026654	0.308782	1:159815940_G_T	MCHC	rs2501353
African	1	159818817	T	C	0.871995	-0.02686	0.021553	0.21266	1:159818817_T_C	MCHC	rs2501345
African	1	159884207	G	C	0.751234	-0.01424	0.015418	0.355698	1:159884207_G_C	MCHC	rs12067321
African	1	159927907	T	C	0.736966	-0.004827	0.01482	0.744636	1:159927907_T_C	MCHC	rs12144158
African	1	160009121	A	C	0.398883	0.018655	0.013527	0.167849	1:160009121_A_C	MCHC	rs1053074
African	1	160038698	G	A	0.872108	0.007753	0.0204	0.703916	1:160038698_G_A	MCHC	rs80298170
African	1	160125463	T	C	0.776293	-0.016533	0.016034	0.302473	1:160125463_T_C	MCHC	rs16831449
African	1	160145688	C	G	0.217186	0.030163	0.016699	0.070881	1:160145688_C_G	MCHC	rs1884996
African	1	160158031	G	A	0.82739	0.018634	0.018142	0.304324	1:160158031_G_A	MCHC	rs76138322
African	1	160162872	A	G	0.8652	-0.012966	0.018967	0.494221	1:160162872_A_G	MCHC	rs617698
African	1	160206394	G	A	0.744451	-0.023233	0.014562	0.110605	1:160206394_G_A	MCHC	rs9633341
African	1	160489974	A	G	0.354637	0.004294	0.013564	0.751587	1:160489974_A_G	MCHC	rs3845627
African	1	160651728	A	G	0.724607	-0.009862	0.015482	0.524146	1:160651728_A_G	MCHC	rs16832311
African	1	160666350	A	G	0.350135	0.023782	0.014194	0.09383	1:160666350_A_G	MCHC	rs504716
African	1	160729163	G	C	0.975515	0.003467	0.045215	0.938868	1:160729163_G_C	MCHC	rs11265475
African	1	160736598	T	C	0.298638	0.016958	0.014683	0.248115	1:160736598_T_C	MCHC	rs492484
African	1	160773029	G	A	0.904041	0.015017	0.021727	0.489482	1:160773029_G_A	MCHC	rs1961611
African	1	161225699	G	C	0.870981	-0.003093	0.020922	0.882446	1:161225699_G_C	MCHC	rs543799247
African	1	161475750	G	A	0.973598	0.013867	0.041937	0.740912	1:161475750_G_A	MCHC	rs10494360
African	1	161481546	T	C	0.822881	0.009123	0.018191	0.616028	1:161481546_T_C	MCHC	rs114926793
African	1	161567067	T	A	0.552791	-0.001115	0.014824	0.940048	1:161567067_T_A	MCHC	rs61801824
African	1	161595730	C	A	0.722994	0.00823	0.017034	0.628989	1:161595730_C_A	MCHC	rs143596860
African	1	161698125	C	T	0.892981	-0.033036	0.02058	0.108431	1:161698125_C_T	MCHC	rs113563530
African	1	161708194	T	G	0.720276	-0.000162	0.014491	0.991086	1:161708194_T_G	MCHC	rs10799941
African	1	162061209	C	T	0.675039	0.016651	0.013624	0.221609	1:162061209_C_T	MCHC	rs16851902
African	1	162177803	G	A	0.307203	0.008341	0.014262	0.55867	1:162177803_G_A	MCHC	rs4656359
African	1	162322803	G	A	0.752983	0.005801	0.015445	0.707236	1:162322803_G_A	MCHC	rs1848843
African	1	162335256	C	T	0.578893	0.003937	0.012942	0.761014	1:162335256_C_T	MCHC	rs348624
African	1	162367874	G	T	0.972484	0.014415	0.039887	0.717812	1:162367874_G_T	MCHC	rs61809468
African	1	162446878	G	A	0.712192	0.000304	0.014779	0.983583	1:162446878_G_A	MCHC	rs469951
African	1	162606728	T	C	0.736896	-0.011505	0.014544	0.428923	1:162606728_T_C	MCHC	rs4656375
African	1	162650763	G	A	0.699133	0.024379	0.013885	0.079143	1:162650763_G_A	MCHC	rs72709727
African	1	162827240	T	G	0.78768	-0.016038	0.015712	0.307355	1:162827240_T_G	MCHC	rs11585029
African	1	162852760	C	T	0.50233	0.003235	0.012704	0.798992	1:162852760_C_T	MCHC	rs4657233
African	1	162929447	G	T	0.1405	-0.00543	0.024049	0.82134	1:162929447_G_T	MCHC	rs10732281
African	1	162970868	A	T	0.914105	0.002907	0.025343	0.908666	1:162970868_A_T	MCHC	rs112616660
African	1	163072899	G	A	0.899403	-0.016479	0.021106	0.434938	1:163072899_G_A	MCHC	rs2661299
African	1	163123382	G	A	0.864189	0.006243	0.018622	0.737446	1:163123382_G_A	MCHC	rs6664123
African	1	163216705	A	G	0.898304	0.017573	0.022446	0.433682	1:163216705_A_G	MCHC	rs2814369
African	1	163217392	G	A	0.971502	-0.026794	0.042601	0.5294	1:163217392_G_A	MCHC	rs114466359
African	1	163241577	G	A	0.924286	0.010552	0.024233	0.663265	1:163241577_G_A	MCHC	rs61812168
African	1	163345829	C	T	0.895351	-0.016533	0.022552	0.463486	1:163345829_C_T	MCHC	rs10917739
African	1	163513839	G	A	0.877213	0.032484	0.022698	0.152365	1:163513839_G_A	MCHC	rs12067389
African	1	163579955	T	C	0.934781	-0.009362	0.028101	0.739035	1:163579955_T_C	MCHC	rs2791149
African	1	163590197	T	C	0.835582	0.023796	0.017514	0.174234	1:163590197_T_C	MCHC	rs7541708
African	1	163855599	C	T	0.562046	-0.014974	0.012892	0.245422	1:163855599_C_T	MCHC	rs7520589
African	1	164068531	C	T	0.857205	-0.020552	0.018383	0.263551	1:164068531_C_T	MCHC	rs12139028
African	1	164392501	A	G	0.544809	-0.00151	0.012598	0.904583	1:164392501_A_G	MCHC	rs2821398
African	1	164492154	C	T	0.925507	0.027799	0.024419	0.254936	1:164492154_C_T	MCHC	rs12402920
African	1	164540861	A	G	0.466953	-0.017384	0.01433	0.225074	1:164540861_A_G	MCHC	rs200773115
African	1	164609305	T	C	0.398344	-0.006889	0.013941	0.621212	1:164609305_T_C	MCHC	rs1780349
African	1	164735436	G	T	0.419423	0.021704	0.013335	0.103604	1:164735436_G_T	MCHC	rs1780360
African	1	164764500	G	A	0.84497	0.037429	0.017699	0.034477	1:164764500_G_A	MCHC	rs4657375
African	1	164934507	T	G	0.411244	-0.018263	0.013286	0.169225	1:164934507_T_G	MCHC	rs1361843
African	1	165117049	T	C	0.16218	0.009386	0.020831	0.652308	1:165117049_T_C	MCHC	rs4657405
African	1	165189595	G	A	0.971939	0.05098	0.040636	0.209614	1:165189595_G_A	MCHC	rs61800524
African	1	165196183	T	C	0.341579	-0.000591	0.013974	0.966243	1:165196183_T_C	MCHC	rs2221418
African	1	165393753	G	T	0.740223	0.018454	0.014549	0.20463	1:165393753_G_T	MCHC	rs3753896
African	1	165562982	C	T	0.751912	-0.029202	0.014655	0.046325	1:165562982_C_T	MCHC	rs1538116
African	1	165605310	A	G	0.219254	-0.007774	0.016751	0.642605	1:165605310_A_G	MCHC	rs10800120
African	1	165743761	G	C	0.778716	-0.008258	0.016255	0.611451	1:165743761_G_C	MCHC	rs61800457
African	1	166640635	T	C	0.601937	-0.003361	0.012844	0.793569	1:166640635_T_C	MCHC	rs472293
African	1	166976836	A	G	0.425209	-0.013151	0.013467	0.328796	1:166976836_A_G	MCHC	rs66805418
African	1	167164887	A	G	0.446829	-0.001286	0.013796	0.925689	1:167164887_A_G	MCHC	rs3931265
African	1	167420425	T	G	0.885484	0.011518	0.019857	0.561915	1:167420425_T_G	MCHC	rs2056626
African	1	167667620	C	T	0.429252	-0.0113	0.013244	0.393524	1:167667620_C_T	MCHC	rs13374598
African	1	168355541	C	G	0.230831	-0.010585	0.01707	0.535246	1:168355541_C_G	MCHC	rs909638
African	1	172332009	A	G	0.680026	0.008016	0.013912	0.564488	1:172332009_A_G	MCHC	rs979935
African	1	173163568	A	G	0.231676	0.028888	0.016335	0.07699	1:173163568_A_G	MCHC	rs7518129
African	1	174242805	G	A	0.310589	-0.022868	0.014199	0.107273	1:174242805_G_A	MCHC	rs10912754
African	1	178097515	G	A	0.71596	0.014707	0.014414	0.307551	1:178097515_G_A	MCHC	rs451341
African	1	43771880	G	A	0.966282	0.003896	0.036399	0.914742	1:43771880_G_A	MCHC	rs74069551
African	1	94980123	G	A	0.947886	-0.01619	0.029591	0.584327	1:94980123_G_A	MCHC	rs72729511
African	2	135777869	G	A	0.975005	0.013673	0.041481	0.741689	2:135777869_G_A	MCHC	rs140516485
African	2	182308352	A	G	0.38157	0.00397	0.013268	0.764761	2:182308352_A_G	MCHC	rs6740847
African	2	182318491	G	A	0.857278	0.001676	0.018238	0.926781	2:182318491_G_A	MCHC	rs72894360
African	2	46308680	A	G	0.242711	0.005131	0.016594	0.757144	2:46308680_A_G	MCHC	rs11690784
African	3	128330526	T	C	0.385161	0.004819	0.012972	0.710262	3:128330526_T_C	MCHC	rs67445542
African	3	183857545	C	G	0.920225	-0.007982	0.024385	0.743431	3:183857545_C_G	MCHC	rs141985150
African	3	184094724	T	C	0.80305	0.005755	0.015965	0.718475	3:184094724_T_C	MCHC	rs13084750
African	3	56849749	T	C	0.756429	0.014005	0.014881	0.346626	3:56849749_T_C	MCHC	rs1354034
African	5	95162889	G	A	0.947445	0.077575	0.028549	0.006598	5:95162889_G_A	MCHC	rs4869251
African	6	135419018	T	C	0.946372	-0.080542	0.028628	0.004916	6:135419018_T_C	MCHC	rs9399137
African	6	139831180	G	A	0.550562	-0.000252	0.012634	0.984067	6:139831180_G_A	MCHC	rs679582
African	6	143558736	T	A	0.963864	-0.039096	0.035088	0.265165	6:143558736_T_A	MCHC	rs73594114
African	6	33482146	C	G	0.424748	0.001626	0.013107	0.901231	6:33482146_C_G	MCHC	rs210194
African	7	106366781	G	A	0.504772	0.012626	0.012703	0.320241	7:106366781_G_A	MCHC	rs10278865
African	7	28711319	G	A	0.861525	0.037798	0.020285	0.062418	7:28711319_G_A	MCHC	rs73304938
African	7	80219147	G	C	0.800305	-0.0002	0.01586	0.989921	7:80219147_G_C	MCHC	rs79957681
African	7	92387918	T	C	0.837597	-0.012475	0.017213	0.468601	7:92387918_T_C	MCHC	rs6970319
African	8	130602281	A	C	0.500492	-0.019644	0.012905	0.12794	8:130602281_A_C	MCHC	rs10103048
African	8	86154040	A	G	0.901661	-0.117724	0.021226	2.99e-08	8:86154040_A_G	MCHC	rs75562449
African	9	91505937	G	A	0.841172	-0.039297	0.017711	0.026525	9:91505937_G_A	MCHC	rs12345705
African	10	64862314	T	G	0.548084	-0.015869	0.012343	0.198534	10:64862314_T_G	MCV	rs4363488
African	11	3953878	C	T	0.976211	0.216783	0.039538	4.28e-08	11:3953878_C_T	MCV	rs112706563
African	11	4947734	T	G	0.977775	0.311443	0.04094	2.93e-14	11:4947734_T_G	MCV	rs59618482
African	11	5214857	A	G	0.449779	0.074569	0.012403	1.88e-09	11:5214857_A_G	MCV	rs7482866
African	11	5259768	A	G	0.736248	-0.076071	0.013911	4.64e-08	11:5259768_A_G	MCV	rs10488681
African	11	5306996	C	T	0.963093	0.183783	0.032993	2.6e-08	11:5306996_C_T	MCV	rs112915912
African	11	63698035	T	A	0.345437	0.020267	0.012871	0.11534	11:63698035_T_A	MCV	rs11231642
African	12	111843000	T	C	0.875901	0.005062	0.017909	0.777455	12:111843000_T_C	MCV	rs114985662
African	13	113969390	T	C	0.54435	-0.038028	0.012641	0.002637	13:113969390_T_C	MCV	rs7326696
African	14	64692465	T	C	0.500436	-0.023406	0.012273	0.056523	14:64692465_T_C	MCV	rs1048315
African	16	108585	T	C	0.124349	0.148979	0.02747	5.98e-08	16:108585_T_C	MCV	rs216598
African	16	130429	G	C	0.961093	0.177125	0.031243	1.47e-08	16:130429_G_C	MCV	rs3176399
African	16	136142	C	T	0.134515	0.125644	0.023437	8.46e-08	16:136142_C_T	MCV	rs2541623
African	16	143503	C	T	0.866962	-0.130774	0.019916	5.34e-11	16:143503_C_T	MCV	rs6600233
African	16	174926	A	C	0.889186	-0.162053	0.018838	8.24e-18	16:174926_A_C	MCV	rs34291820
African	16	2028402	A	C	0.419551	0.072024	0.012988	3e-08	16:2028402_A_C	MCV	rs8460
African	16	207373	A	T	0.959141	-0.175271	0.030586	1.03e-08	16:207373_A_T	MCV	rs538965378
African	16	225185	A	G	0.986875	0.390698	0.061356	1.98e-10	16:225185_A_G	MCV	rs555255920
African	16	3004161	T	A	0.183914	0.111871	0.019791	1.62e-08	16:3004161_T_A	MCV	rs4785921
African	16	304514	C	T	0.864852	-0.107144	0.017827	1.91e-09	16:304514_C_T	MCV	rs3213508
African	16	319822	G	C	0.985125	0.50002	0.053598	1.14e-20	16:319822_G_C	MCV	rs112877257
African	16	321754	T	G	0.968118	-0.21872	0.038269	1.12e-08	16:321754_T_G	MCV	rs183388202
African	16	324479	C	G	0.786171	0.325994	0.017321	5.77e-79	16:324479_C_G	MCV	rs3752435
African	16	326773	A	G	0.771434	0.200599	0.017535	2.87e-30	16:326773_A_G	MCV	rs73486221
African	16	336071	A	T	0.978162	0.510428	0.074298	6.66e-12	16:336071_A_T	MCV	rs546817919
African	16	360148	C	T	0.872011	-0.113341	0.017844	2.2e-10	16:360148_C_T	MCV	rs55931984
African	16	408299	C	T	0.963438	0.268138	0.032877	3.64e-16	16:408299_C_T	MCV	rs77621702
African	16	418154	G	C	0.969613	-0.17563	0.039749	1.01e-05	16:418154_G_C	MCV	rs150051846
African	16	4473077	T	C	0.792612	-0.101983	0.016432	5.58e-10	16:4473077_T_C	MCV	rs3948237
African	16	449659	G	A	0.450642	-0.106558	0.012644	3.72e-17	16:449659_G_A	MCV	rs14293
African	16	450759	C	G	0.273394	0.114443	0.015355	9.53e-14	16:450759_C_G	MCV	rs407983
African	16	617757	A	G	0.971758	0.264081	0.038638	8.53e-12	16:617757_A_G	MCV	rs115165076
African	16	66679	T	C	0.724507	-0.158864	0.026909	3.65e-09	16:66679_T_C	MCV	rs575317242
African	16	68704	C	T	0.966395	0.494105	0.064421	1.8e-14	16:68704_C_T	MCV	rs537557137
African	16	771108	C	A	0.652601	-0.067279	0.013491	6.25e-07	16:771108_C_A	MCV	rs56085648
African	16	796508	G	T	0.890985	0.145762	0.025038	5.99e-09	16:796508_G_T	MCV	rs182560663
African	16	817561	G	A	0.341344	0.098414	0.01687	5.57e-09	16:817561_G_A	MCV	rs536284860
African	16	82334	G	A	0.986798	0.77584	0.058443	3.55e-40	16:82334_G_A	MCV	rs35391410
African	16	83562	C	T	0.922817	0.319823	0.026263	4.47e-34	16:83562_C_T	MCV	rs2541685
African	16	85065	G	A	0.821528	-0.106782	0.018156	4.18e-09	16:85065_G_A	MCV	rs3930588
African	16	858094	A	G	0.466942	0.070822	0.012892	4.03e-08	16:858094_A_G	MCV	rs72759417
African	16	85932730	C	A	0.940208	0.015139	0.024963	0.54423	16:85932730_C_A	MCV	rs12325654
African	16	99565	G	A	0.985854	0.254315	0.051573	8.32e-07	16:99565_G_A	MCV	rs150800825
African	17	38028634	G	T	0.616343	-0.019981	0.012357	0.105876	17:38028634_G_T	MCV	rs11557467
African	19	16185559	G	A	0.905182	-0.00506	0.021145	0.810876	19:16185559_G_A	MCV	rs8109288
African	19	6802571	C	T	0.918329	-0.027885	0.022367	0.212475	19:6802571_C_T	MCV	rs8106212
African	1	100846956	T	C	0.152372	-0.001225	0.023069	0.957623	1:100846956_T_C	MCV	rs565590
African	1	102502084	T	C	0.932977	-0.056749	0.028545	0.046821	1:102502084_T_C	MCV	rs12046299
African	1	103025218	T	C	0.439707	0.007215	0.012265	0.556399	1:103025218_T_C	MCV	rs1589096
African	1	106081299	A	G	0.484874	-0.017769	0.012484	0.154626	1:106081299_A_G	MCV	rs1710774
African	1	107535806	T	A	0.725229	-0.014252	0.01409	0.311764	1:107535806_T_A	MCV	rs9435338
African	1	109827253	A	G	0.463898	-0.004451	0.01258	0.723472	1:109827253_A_G	MCV	rs672569
African	1	110231777	G	A	0.917647	-0.0339	0.036545	0.353591	1:110231777_G_A	MCV	rs4147565
African	1	111100498	G	A	0.825318	0.016899	0.017946	0.34637	1:111100498_G_A	MCV	rs11102131
African	1	111163693	C	T	0.743468	-0.00554	0.014683	0.705954	1:111163693_C_T	MCV	rs12132073
African	1	111748488	A	G	0.886996	0.01055	0.021945	0.63071	1:111748488_A_G	MCV	rs2783440
African	1	112320846	T	G	0.414317	-0.008601	0.012721	0.498981	1:112320846_T_G	MCV	rs535183
African	1	112612098	G	A	0.635541	-0.014857	0.012665	0.240754	1:112612098_G_A	MCV	rs269127
African	1	112767483	T	C	0.516238	-0.026885	0.012992	0.03853	1:112767483_T_C	MCV	rs56693678
African	1	112824160	C	T	0.906546	0.012671	0.02272	0.577082	1:112824160_C_T	MCV	rs4073809
African	1	112941134	G	A	0.562567	0.027371	0.012486	0.028393	1:112941134_G_A	MCV	rs2492508
African	1	113022434	A	G	0.52533	-0.003862	0.012293	0.753418	1:113022434_A_G	MCV	rs10857956
African	1	113085721	A	C	0.193473	0.01397	0.018592	0.452442	1:113085721_A_C	MCV	rs4838959
African	1	113344299	G	A	0.473279	-0.00958	0.012739	0.452049	1:113344299_G_A	MCV	rs10745336
African	1	113874773	T	G	0.952683	-0.027772	0.032166	0.387918	1:113874773_T_G	MCV	rs1935746
African	1	114078037	A	G	0.636306	-0.017521	0.013194	0.184164	1:114078037_A_G	MCV	rs12026423
African	1	114671733	C	A	0.908317	0.01141	0.02114	0.589396	1:114671733_C_A	MCV	rs79356431
African	1	114681932	T	C	0.090644	0.098576	0.040747	0.015574	1:114681932_T_C	MCV	rs2629808
African	1	115618547	T	C	0.940986	-0.001032	0.028782	0.971389	1:115618547_T_C	MCV	rs4839022
African	1	115734289	G	A	0.751424	0.003799	0.014692	0.795963	1:115734289_G_A	MCV	rs195203
African	1	116083584	C	T	0.689368	-0.008917	0.013031	0.493819	1:116083584_C_T	MCV	rs6672158
African	1	116416579	C	T	0.926077	0.005734	0.026283	0.827289	1:116416579_C_T	MCV	rs10923690
African	1	116724459	A	G	0.534169	-0.001861	0.012161	0.878361	1:116724459_A_G	MCV	rs911221
African	1	116886547	G	T	0.523978	-0.020176	0.012408	0.103956	1:116886547_G_T	MCV	rs6701849
African	1	116923792	A	G	0.423378	-0.003896	0.01268	0.758656	1:116923792_A_G	MCV	rs6428896
African	1	117554421	A	G	0.913993	0.016342	0.023827	0.4928	1:117554421_A_G	MCV	rs3754112
African	1	117728652	A	G	0.712754	0.016332	0.01398	0.242705	1:117728652_A_G	MCV	rs10047089
African	1	117771515	C	T	0.433148	-0.004575	0.012367	0.711447	1:117771515_C_T	MCV	rs10754343
African	1	117793269	T	A	0.405984	-0.014801	0.013367	0.268187	1:117793269_T_A	MCV	rs6428700
African	1	118126591	C	T	0.279219	0.000741	0.01536	0.961488	1:118126591_C_T	MCV	rs861152
African	1	118282130	A	C	0.847287	0.012587	0.017646	0.47569	1:118282130_A_C	MCV	rs12137791
African	1	119054510	T	A	0.852685	-0.005485	0.018552	0.767486	1:119054510_T_A	MCV	rs7519196
African	1	119992162	C	G	0.825331	-0.007846	0.017548	0.654811	1:119992162_C_G	MCV	rs12039340
African	1	120021503	T	G	0.513261	-0.01817	0.012242	0.137733	1:120021503_T_G	MCV	rs74525369
African	1	121153366	G	C	0.827292	0.024414	0.020555	0.234918	1:121153366_G_C	MCV	rs2003134
African	1	121429112	C	G	0.345656	-0.019593	0.019519	0.315448	1:121429112_C_G	MCV	rs200129125
African	1	143396820	T	C	0.076457	-0.009891	0.049401	0.841302	1:143396820_T_C	MCV	rs3105533
African	1	143734242	C	T	0.884534	-0.017274	0.038065	0.649992	1:143734242_C_T	MCV	rs12132106
African	1	145554450	T	C	0.924606	-0.025807	0.026375	0.327839	1:145554450_T_C	MCV	rs12125340
African	1	145560476	G	A	0.3436	0.003093	0.01368	0.821138	1:145560476_G_A	MCV	rs10797650
African	1	146589758	C	T	0.422793	-0.00242	0.01263	0.848036	1:146589758_C_T	MCV	rs750467
African	1	146817245	A	T	0.480343	0.00048	0.012021	0.96812	1:146817245_A_T	MCV	rs6693667
African	1	147003202	G	T	0.931692	0.056211	0.027423	0.040409	1:147003202_G_T	MCV	rs112530376
African	1	147013836	A	C	0.341779	-0.01905	0.013553	0.159809	1:147013836_A_C	MCV	rs594132
African	1	147056280	C	A	0.603348	-0.006981	0.013079	0.593533	1:147056280_C_A	MCV	rs628928
African	1	147220045	C	A	0.94594	0.00541	0.029355	0.853781	1:147220045_C_A	MCV	rs12032789
African	1	147381558	G	A	0.483133	0.013089	0.013962	0.348504	1:147381558_G_A	MCV	rs2132397
African	1	147797417	G	A	0.498343	-0.008037	0.012986	0.535964	1:147797417_G_A	MCV	rs2105069
African	1	149868334	C	T	0.527695	-0.011818	0.012902	0.359678	1:149868334_C_T	MCV	rs12062387
African	1	149892872	A	G	0.87124	-0.008309	0.020528	0.685684	1:149892872_A_G	MCV	rs11205277
African	1	150047928	T	C	0.379743	-0.014742	0.012813	0.249928	1:150047928_T_C	MCV	rs10888571
African	1	150202423	A	G	0.688041	0.018101	0.013078	0.166308	1:150202423_A_G	MCV	rs11205344
African	1	150244046	G	A	0.717374	-0.005405	0.01345	0.687793	1:150244046_G_A	MCV	rs73011380
African	1	150672262	T	C	0.380793	-0.01868	0.01256	0.136942	1:150672262_T_C	MCV	rs1932864
African	1	151118035	C	G	0.3854	-0.008768	0.01308	0.502676	1:151118035_C_G	MCV	rs11204782
African	1	151343545	T	C	0.857992	-0.004798	0.018137	0.79135	1:151343545_T_C	MCV	rs61818027
African	1	151445752	C	T	0.563805	0.005431	0.012861	0.672859	1:151445752_C_T	MCV	rs10888415
African	1	151692483	A	G	0.797229	-0.013984	0.015819	0.376697	1:151692483_A_G	MCV	rs6683687
African	1	151737129	A	G	0.764718	-0.011777	0.014014	0.400703	1:151737129_A_G	MCV	rs61186168
African	1	152007599	T	C	0.734949	-0.001568	0.0133	0.906132	1:152007599_T_C	MCV	rs3007676
African	1	152161103	T	G	0.370888	-0.003419	0.012602	0.78615	1:152161103_T_G	MCV	rs1390489
African	1	152391282	C	A	0.572454	0.01208	0.012121	0.318926	1:152391282_C_A	MCV	rs4845766
African	1	152552285	C	A	0.818853	-0.008595	0.015821	0.586985	1:152552285_C_A	MCV	rs512208
African	1	152558146	G	A	0.885888	-0.007588	0.019941	0.703569	1:152558146_G_A	MCV	rs76340524
African	1	152779534	A	T	0.845523	0.019293	0.017754	0.27714	1:152779534_A_T	MCV	rs28649970
African	1	152887237	T	C	0.54508	0.006385	0.012217	0.601282	1:152887237_T_C	MCV	rs6587711
African	1	152946894	A	G	0.792199	-0.005579	0.014683	0.703997	1:152946894_A_G	MCV	rs10159262
African	1	153065287	A	C	0.472836	-0.004456	0.012517	0.721856	1:153065287_A_C	MCV	rs3843257
African	1	153143504	C	G	0.55645	-0.010493	0.012533	0.402451	1:153143504_C_G	MCV	rs498131
African	1	153200987	C	T	0.862453	0.024411	0.01845	0.185788	1:153200987_C_T	MCV	rs12081567
African	1	153334077	C	A	0.805362	0.009633	0.016147	0.550807	1:153334077_C_A	MCV	rs3014869
African	1	153337943	G	A	0.897473	0.003567	0.021288	0.866921	1:153337943_G_A	MCV	rs3014874
African	1	153390542	G	C	0.615135	0.000704	0.013105	0.957165	1:153390542_G_C	MCV	rs3006412
African	1	153459023	C	T	0.558192	-0.008663	0.012868	0.500829	1:153459023_C_T	MCV	rs7535089
African	1	153530231	T	A	0.662569	-0.011659	0.013159	0.37561	1:153530231_T_A	MCV	rs28689606
African	1	153630726	T	C	0.692807	0.016546	0.013193	0.209767	1:153630726_T_C	MCV	rs58379041
African	1	154044453	T	C	0.958031	-0.019428	0.041028	0.635854	1:154044453_T_C	MCV	rs113462784
African	1	154206358	T	C	0.974272	-0.090288	0.042772	0.034801	1:154206358_T_C	MCV	rs12027999
African	1	154292348	G	A	0.245854	-0.022827	0.015553	0.142172	1:154292348_G_A	MCV	rs1685606
African	1	154342517	C	T	0.944341	0.001814	0.031077	0.95343	1:154342517_C_T	MCV	rs79438587
African	1	154407419	A	C	0.772802	-0.013772	0.014834	0.353203	1:154407419_A_C	MCV	rs7518199
African	1	154440604	T	C	0.843127	0.004424	0.01673	0.791455	1:154440604_T_C	MCV	rs41308415
African	1	154665606	T	C	0.963342	0.062016	0.039325	0.114784	1:154665606_T_C	MCV	rs57541561
African	1	154726546	G	C	0.833366	0.020625	0.017569	0.240391	1:154726546_G_C	MCV	rs10494300
African	1	154731622	C	T	0.901824	0.015746	0.021908	0.472322	1:154731622_C_T	MCV	rs12038684
African	1	154763613	G	T	0.912191	-0.012957	0.023199	0.576504	1:154763613_G_T	MCV	rs113920303
African	1	154788815	C	T	0.771376	-0.001416	0.014549	0.922417	1:154788815_C_T	MCV	rs59517499
African	1	154822907	C	T	0.727235	-0.017745	0.01411	0.208503	1:154822907_C_T	MCV	rs906595
African	1	155008610	A	G	0.272181	0.000906	0.014737	0.950975	1:155008610_A_G	MCV	rs4845406
African	1	155129499	A	G	0.696138	-0.003691	0.013154	0.779032	1:155129499_A_G	MCV	rs150587259
African	1	155682870	C	T	0.316245	0.024681	0.013914	0.076104	1:155682870_C_T	MCV	rs490608
African	1	156085375	T	C	0.517889	-0.00556	0.012331	0.652102	1:156085375_T_C	MCV	rs547915
African	1	156184659	T	G	0.789714	0.004279	0.014681	0.770685	1:156184659_T_G	MCV	rs7530415
African	1	156247481	C	T	0.8691	-0.006825	0.018425	0.711067	1:156247481_C_T	MCV	rs10908493
African	1	156361116	G	A	0.861486	-0.009697	0.017475	0.578966	1:156361116_G_A	MCV	rs73010652
African	1	156407051	T	C	0.482369	-0.020887	0.01269	0.099769	1:156407051_T_C	MCV	rs6665039
African	1	156484318	C	G	0.306601	-0.000375	0.013798	0.978281	1:156484318_C_G	MCV	rs6427312
African	1	156613517	C	A	0.270199	-0.009994	0.014946	0.503741	1:156613517_C_A	MCV	rs4233511
African	1	156619135	A	T	0.264254	0.000873	0.015695	0.955618	1:156619135_A_T	MCV	rs4233512
African	1	156687576	C	T	0.256663	-0.006246	0.015562	0.688177	1:156687576_C_T	MCV	rs4661214
African	1	156819216	T	C	0.861049	-0.00082	0.018011	0.963678	1:156819216_T_C	MCV	rs74118779
African	1	156833913	A	G	0.761059	-0.001728	0.014971	0.908107	1:156833913_A_G	MCV	rs74118782
African	1	156838974	C	T	0.791391	0.004711	0.01534	0.758745	1:156838974_C_T	MCV	rs61813772
African	1	157016710	C	T	0.935019	-0.036086	0.025824	0.162278	1:157016710_C_T	MCV	rs11264606
African	1	157069154	A	G	0.507781	-0.016195	0.012366	0.190286	1:157069154_A_G	MCV	rs16838075
African	1	157126453	C	G	0.925703	0.052662	0.025721	0.040637	1:157126453_C_G	MCV	rs61799686
African	1	157140430	C	A	0.824466	0.007863	0.015843	0.619708	1:157140430_C_A	MCV	rs6657979
African	1	157154912	C	G	0.753323	-0.003189	0.014912	0.830644	1:157154912_C_G	MCV	rs74119210
African	1	157275048	C	T	0.957863	-0.007503	0.03414	0.82605	1:157275048_C_T	MCV	rs12047109
African	1	157321422	C	T	0.350862	-0.008535	0.013619	0.530882	1:157321422_C_T	MCV	rs9427263
African	1	157341048	A	G	0.810243	-0.013311	0.01549	0.390151	1:157341048_A_G	MCV	rs12080330
African	1	157435230	G	A	0.495678	0.007835	0.012358	0.526108	1:157435230_G_A	MCV	rs4111874
African	1	157479006	G	A	0.969882	0.046924	0.049608	0.344188	1:157479006_G_A	MCV	rs4110937
African	1	157485275	T	G	0.589576	0.022446	0.012173	0.065197	1:157485275_T_G	MCV	rs3811036
African	1	157541674	A	C	0.314005	0.011629	0.013968	0.405116	1:157541674_A_C	MCV	rs849819
African	1	157820033	T	C	0.896234	-0.003401	0.01946	0.861255	1:157820033_T_C	MCV	rs16839297
African	1	157979035	A	G	0.703504	-0.005548	0.013292	0.676385	1:157979035_A_G	MCV	rs6680700
African	1	157991269	G	C	0.696855	-0.005362	0.013056	0.681316	1:157991269_G_C	MCV	rs11264874
African	1	158024742	A	G	0.195748	0.015061	0.016994	0.37547	1:158024742_A_G	MCV	rs7523161
African	1	158032447	T	G	0.187936	-0.005705	0.018488	0.757649	1:158032447_T_G	MCV	rs6677623
African	1	158053170	A	G	0.586177	0.005711	0.012111	0.637289	1:158053170_A_G	MCV	rs73024667
African	1	158084162	T	C	0.819383	-0.003329	0.015908	0.834246	1:158084162_T_C	MCV	rs57035221
African	1	158108284	T	A	0.606937	0.011382	0.012657	0.368516	1:158108284_T_A	MCV	rs10908624
African	1	158265973	T	C	0.78492	-0.012265	0.014821	0.407955	1:158265973_T_C	MCV	rs73023953
African	1	158365697	C	T	0.734611	-0.004596	0.014301	0.747917	1:158365697_C_T	MCV	rs12405213
African	1	158398965	C	T	0.973072	-0.07008	0.041712	0.092938	1:158398965_C_T	MCV	rs144581779
African	1	158542883	G	A	0.831032	-0.025581	0.016015	0.110182	1:158542883_G_A	MCV	rs55755372
African	1	158618455	G	A	0.868103	-0.000192	0.019127	0.992	1:158618455_G_A	MCV	rs2246434
African	1	158644851	A	G	0.14936	0.020637	0.020127	0.305175	1:158644851_A_G	MCV	rs703117
African	1	158679507	A	T	0.896742	0.024958	0.019309	0.196128	1:158679507_A_T	MCV	rs434260
African	1	158701660	A	C	0.947215	0.036178	0.027653	0.190759	1:158701660_A_C	MCV	rs77800865
African	1	158785094	C	T	0.662304	-0.001295	0.012692	0.918694	1:158785094_C_T	MCV	rs857786
African	1	158833656	G	T	0.123845	0.049791	0.028831	0.084173	1:158833656_G_T	MCV	rs2820126
African	1	158903759	T	G	0.343752	0.012815	0.01669	0.442578	1:158903759_T_G	MCV	rs1772397
African	1	158907751	A	C	0.959366	-0.03194	0.03582	0.372555	1:158907751_A_C	MCV	rs113812917
African	1	158912448	G	A	0.17608	-0.025154	0.018512	0.174183	1:158912448_G_A	MCV	rs856081
African	1	158950333	T	C	0.26244	0.003954	0.014086	0.778928	1:158950333_T_C	MCV	rs856138
African	1	158980645	G	A	0.207536	0.004552	0.015996	0.775965	1:158980645_G_A	MCV	rs864439
African	1	159162922	G	A	0.713001	0.001006	0.013509	0.940605	1:159162922_G_A	MCV	rs2852717
African	1	159252040	G	T	0.93345	0.017433	0.023712	0.46223	1:159252040_G_T	MCV	rs16841975
African	1	159511202	C	T	0.446688	0.017778	0.012414	0.152098	1:159511202_C_T	MCV	rs4465205
African	1	159608533	T	C	0.814943	-0.005578	0.015333	0.716009	1:159608533_T_C	MCV	rs74122971
African	1	159737983	C	T	0.867359	-0.014429	0.018655	0.439261	1:159737983_C_T	MCV	rs10159314
African	1	159768918	C	T	0.947914	0.001956	0.029406	0.946944	1:159768918_C_T	MCV	rs72700611
African	1	159782360	G	A	0.875762	0.001684	0.01859	0.927813	1:159782360_G_A	MCV	rs77142732
African	1	159800098	A	G	0.786116	0.007283	0.015288	0.633797	1:159800098_A_G	MCV	rs41317533
African	1	159815940	G	T	0.132768	-0.034211	0.025064	0.172255	1:159815940_G_T	MCV	rs2501353
African	1	159818817	T	C	0.877969	-0.000102	0.02014	0.995947	1:159818817_T_C	MCV	rs2501345
African	1	159884207	G	C	0.766301	0.021736	0.014776	0.141257	1:159884207_G_C	MCV	rs12067321
African	1	159927907	T	C	0.745596	-0.009728	0.014106	0.490441	1:159927907_T_C	MCV	rs12144158
African	1	160009121	A	C	0.410831	-0.00481	0.012757	0.706174	1:160009121_A_C	MCV	rs1053074
African	1	160038698	G	A	0.88121	-0.012049	0.019326	0.532994	1:160038698_G_A	MCV	rs80298170
African	1	160125463	T	C	0.790367	0.000806	0.015263	0.957884	1:160125463_T_C	MCV	rs16831449
African	1	160145688	C	G	0.219772	0.013508	0.015897	0.395477	1:160145688_C_G	MCV	rs1884996
African	1	160158031	G	A	0.836744	0.013164	0.017179	0.443521	1:160158031_G_A	MCV	rs76138322
African	1	160162872	A	G	0.847065	0.019624	0.017826	0.270945	1:160162872_A_G	MCV	rs617698
African	1	160206394	G	A	0.730558	-0.000686	0.013841	0.960449	1:160206394_G_A	MCV	rs9633341
African	1	160489974	A	G	0.334715	0.000639	0.013125	0.961149	1:160489974_A_G	MCV	rs3845627
African	1	160651728	A	G	0.740939	-0.020259	0.014563	0.164167	1:160651728_A_G	MCV	rs16832311
African	1	160666350	A	G	0.33278	-0.006391	0.013423	0.633994	1:160666350_A_G	MCV	rs504716
African	1	160729163	G	C	0.970069	0.025229	0.041029	0.538633	1:160729163_G_C	MCV	rs11265475
African	1	160736598	T	C	0.281768	0.039217	0.013919	0.004853	1:160736598_T_C	MCV	rs492484
African	1	160773029	G	A	0.891705	0.014364	0.020408	0.481526	1:160773029_G_A	MCV	rs1961611
African	1	161225699	G	C	0.879993	0.007601	0.019385	0.694993	1:161225699_G_C	MCV	rs543799247
African	1	161475750	G	A	0.967453	0.02601	0.039052	0.505403	1:161475750_G_A	MCV	rs10494360
African	1	161481546	T	C	0.831364	-0.008734	0.01724	0.612463	1:161481546_T_C	MCV	rs114926793
African	1	161567067	T	A	0.539508	-0.002466	0.013883	0.859015	1:161567067_T_A	MCV	rs61801824
African	1	161595730	C	A	0.703383	-0.005343	0.015347	0.727765	1:161595730_C_A	MCV	rs143596860
African	1	161698125	C	T	0.899817	-0.007923	0.019655	0.686881	1:161698125_C_T	MCV	rs113563530
African	1	161708194	T	G	0.737049	0.018519	0.013825	0.180381	1:161708194_T_G	MCV	rs10799941
African	1	162061209	C	T	0.694337	0.021333	0.013027	0.101491	1:162061209_C_T	MCV	rs16851902
African	1	162177803	G	A	0.290942	-0.014948	0.013617	0.27229	1:162177803_G_A	MCV	rs4656359
African	1	162322803	G	A	0.769934	-0.002123	0.014661	0.884847	1:162322803_G_A	MCV	rs1848843
African	1	162335256	C	T	0.595564	-0.001751	0.012373	0.887467	1:162335256_C_T	MCV	rs348624
African	1	162367874	G	T	0.965468	-0.023077	0.036634	0.528748	1:162367874_G_T	MCV	rs61809468
African	1	162446878	G	A	0.731063	0.016325	0.0142	0.250268	1:162446878_G_A	MCV	rs469951
African	1	162606728	T	C	0.715046	0.021147	0.013829	0.126212	1:162606728_T_C	MCV	rs4656375
African	1	162650763	G	A	0.713915	0.030374	0.013298	0.022384	1:162650763_G_A	MCV	rs72709727
African	1	162827240	T	G	0.799918	-0.008896	0.015001	0.553185	1:162827240_T_G	MCV	rs11585029
African	1	162852760	C	T	0.475404	0.001907	0.01214	0.875194	1:162852760_C_T	MCV	rs4657233
African	1	162929447	G	T	0.153444	-0.010907	0.022485	0.627662	1:162929447_G_T	MCV	rs10732281
African	1	162970868	A	T	0.916575	0.006699	0.023955	0.779758	1:162970868_A_T	MCV	rs112616660
African	1	163072899	G	A	0.883456	-0.015861	0.019786	0.422781	1:163072899_G_A	MCV	rs2661299
African	1	163123382	G	A	0.853879	0.014114	0.017538	0.420969	1:163123382_G_A	MCV	rs6664123
African	1	163216705	A	G	0.904631	0.022674	0.021471	0.29094	1:163216705_A_G	MCV	rs2814369
African	1	163217392	G	A	0.963953	-0.065478	0.038392	0.088101	1:163217392_G_A	MCV	rs114466359
African	1	163241577	G	A	0.917281	-0.02988	0.022856	0.191079	1:163241577_G_A	MCV	rs61812168
African	1	163345829	C	T	0.876573	-0.011343	0.021228	0.593141	1:163345829_C_T	MCV	rs10917739
African	1	163513839	G	A	0.887323	0.035626	0.021738	0.101239	1:163513839_G_A	MCV	rs12067389
African	1	163579955	T	C	0.922543	-0.002503	0.025849	0.922827	1:163579955_T_C	MCV	rs2791149
African	1	163590197	T	C	0.82048	-0.002901	0.016678	0.861916	1:163590197_T_C	MCV	rs7541708
African	1	163855599	C	T	0.579189	-0.014855	0.01232	0.227901	1:163855599_C_T	MCV	rs7520589
African	1	164068531	C	T	0.839962	-0.016458	0.017439	0.345295	1:164068531_C_T	MCV	rs12139028
African	1	164392501	A	G	0.566975	-0.004104	0.012015	0.732686	1:164392501_A_G	MCV	rs2821398
African	1	164492154	C	T	0.91315	-0.005958	0.023162	0.797007	1:164492154_C_T	MCV	rs12402920
African	1	164540861	A	G	0.494897	0.000529	0.013235	0.968124	1:164540861_A_G	MCV	rs200773115
African	1	164609305	T	C	0.370895	-0.01231	0.013448	0.359985	1:164609305_T_C	MCV	rs1780349
African	1	164735436	G	T	0.394934	0.002906	0.01276	0.819815	1:164735436_G_T	MCV	rs1780360
African	1	164764500	G	A	0.836867	0.029397	0.016703	0.078419	1:164764500_G_A	MCV	rs4657375
African	1	164934507	T	G	0.385542	0.002668	0.012706	0.833681	1:164934507_T_G	MCV	rs1361843
African	1	165117049	T	C	0.166319	-0.008855	0.019633	0.65199	1:165117049_T_C	MCV	rs4657405
African	1	165189595	G	A	0.96421	0.053124	0.036579	0.1464	1:165189595_G_A	MCV	rs61800524
African	1	165196183	T	C	0.320443	-0.005046	0.013432	0.707188	1:165196183_T_C	MCV	rs2221418
African	1	165393753	G	T	0.717304	-0.001854	0.013793	0.893045	1:165393753_G_T	MCV	rs3753896
African	1	165562982	C	T	0.732688	-0.026476	0.013871	0.056306	1:165562982_C_T	MCV	rs1538116
African	1	165605310	A	G	0.228342	0.008088	0.015807	0.608905	1:165605310_A_G	MCV	rs10800120
African	1	165743761	G	C	0.75478	-0.011777	0.014774	0.425357	1:165743761_G_C	MCV	rs61800457
African	1	166640635	T	C	0.620181	-0.006591	0.012252	0.590635	1:166640635_T_C	MCV	rs472293
African	1	166976836	A	G	0.442568	-0.004907	0.012355	0.691248	1:166976836_A_G	MCV	rs66805418
African	1	167164887	A	G	0.408171	0.015524	0.01311	0.236318	1:167164887_A_G	MCV	rs3931265
African	1	167420425	T	G	0.863805	-0.033075	0.018603	0.075422	1:167420425_T_G	MCV	rs2056626
African	1	167667620	C	T	0.459957	0.006716	0.012642	0.595262	1:167667620_C_T	MCV	rs13374598
African	1	168355541	C	G	0.263854	-0.002008	0.016208	0.901364	1:168355541_C_G	MCV	rs909638
African	1	172332009	A	G	0.642118	-0.0205	0.013268	0.122335	1:172332009_A_G	MCV	rs979935
African	1	173163568	A	G	0.259779	0.014465	0.015578	0.35311	1:173163568_A_G	MCV	rs7518129
African	1	174242805	G	A	0.338237	-0.03125	0.013561	0.021223	1:174242805_G_A	MCV	rs10912754
African	1	178097515	G	A	0.689902	0.002301	0.013713	0.866734	1:178097515_G_A	MCV	rs451341
African	1	43771880	G	A	0.968749	0.070281	0.035032	0.044855	1:43771880_G_A	MCV	rs74069551
African	1	94980123	G	A	0.927993	0.010055	0.02712	0.710819	1:94980123_G_A	MCV	rs72729511
African	2	135777869	G	A	0.976889	-0.029427	0.039741	0.459022	2:135777869_G_A	MCV	rs140516485
African	2	182308352	A	G	0.386355	-0.001369	0.012535	0.913027	2:182308352_A_G	MCV	rs6740847
African	2	182318491	G	A	0.848999	-0.007847	0.017327	0.650638	2:182318491_G_A	MCV	rs72894360
African	2	46308680	A	G	0.263654	-0.013242	0.01559	0.395682	2:46308680_A_G	MCV	rs11690784
African	3	128330526	T	C	0.382563	-0.026457	0.01235	0.032193	3:128330526_T_C	MCV	rs67445542
African	3	183857545	C	G	0.92565	0.013831	0.023434	0.555078	3:183857545_C_G	MCV	rs141985150
African	3	184094724	T	C	0.813062	0.010846	0.015215	0.475934	3:184094724_T_C	MCV	rs13084750
African	3	56849749	T	C	0.734413	0.00446	0.014095	0.751659	3:56849749_T_C	MCV	rs1354034
African	5	95162889	G	A	0.946251	0.151968	0.026901	1.65e-08	5:95162889_G_A	MCV	rs4869251
African	6	135419018	T	C	0.938819	-0.163178	0.027715	4.02e-09	6:135419018_T_C	MCV	rs9399137
African	6	139831180	G	A	0.537928	0.08233	0.012013	7.49e-12	6:139831180_G_A	MCV	rs679582
African	6	143558736	T	A	0.965488	-0.027319	0.033291	0.411877	6:143558736_T_A	MCV	rs73594114
African	6	33482146	C	G	0.456069	-0.015139	0.012526	0.226825	6:33482146_C_G	MCV	rs210194
African	7	106366781	G	A	0.507339	-0.014287	0.012022	0.234679	7:106366781_G_A	MCV	rs10278865
African	7	28711319	G	A	0.871133	-0.029449	0.019243	0.125923	7:28711319_G_A	MCV	rs73304938
African	7	80219147	G	C	0.80976	0.031528	0.015129	0.037192	7:80219147_G_C	MCV	rs79957681
African	7	92387918	T	C	0.849949	0.045641	0.01646	0.005571	7:92387918_T_C	MCV	rs6970319
African	8	130602281	A	C	0.492757	0.01994	0.012213	0.102542	8:130602281_A_C	MCV	rs10103048
African	8	86154040	A	G	0.910825	0.01792	0.020464	0.381202	8:86154040_A_G	MCV	rs75562449
African	9	91505937	G	A	0.854156	-0.005641	0.017101	0.741514	9:91505937_G_A	MCV	rs12345705
African	10	64862314	T	G	0.552284	0.01129	0.012624	0.371165	10:64862314_T_G	Mono	rs4363488
African	11	3953878	C	T	0.975184	-0.010317	0.039786	0.795384	11:3953878_C_T	Mono	rs112706563
African	11	4947734	T	G	0.976973	-0.120776	0.041555	0.003668	11:4947734_T_G	Mono	rs59618482
African	11	5214857	A	G	0.448626	-0.005521	0.012753	0.665121	11:5214857_A_G	Mono	rs7482866
African	11	5259768	A	G	0.733706	0.001382	0.014283	0.922872	11:5259768_A_G	Mono	rs10488681
African	11	5306996	C	T	0.962559	-0.055162	0.033787	0.102545	11:5306996_C_T	Mono	rs112915912
African	11	63698035	T	A	0.350394	-0.003963	0.013125	0.762717	11:63698035_T_A	Mono	rs11231642
African	12	111843000	T	C	0.874005	-0.053782	0.018328	0.003354	12:111843000_T_C	Mono	rs114985662
African	13	113969390	T	C	0.539794	0.009628	0.012917	0.456033	13:113969390_T_C	Mono	rs7326696
African	14	64692465	T	C	0.492873	0.001759	0.012543	0.888459	14:64692465_T_C	Mono	rs1048315
African	16	108585	T	C	0.126243	-0.00295	0.028214	0.916703	16:108585_T_C	Mono	rs216598
African	16	130429	G	C	0.961066	-0.033801	0.031974	0.29043	16:130429_G_C	Mono	rs3176399
African	16	136142	C	T	0.135882	-0.017633	0.024249	0.467138	16:136142_C_T	Mono	rs2541623
African	16	143503	C	T	0.871611	-0.0092	0.020472	0.653181	16:143503_C_T	Mono	rs6600233
African	16	174926	A	C	0.888462	0.029254	0.019394	0.131447	16:174926_A_C	Mono	rs34291820
African	16	2028402	A	C	0.415704	0.005982	0.013325	0.653527	16:2028402_A_C	Mono	rs8460
African	16	207373	A	T	0.958479	-0.066763	0.031327	0.033096	16:207373_A_T	Mono	rs538965378
African	16	225185	A	G	0.98633	0.157169	0.062285	0.011643	16:225185_A_G	Mono	rs555255920
African	16	3004161	T	A	0.180421	-0.017657	0.020386	0.386415	16:3004161_T_A	Mono	rs4785921
African	16	304514	C	T	0.866751	0.01883	0.018421	0.306675	16:304514_C_T	Mono	rs3213508
African	16	319822	G	C	0.984765	0.000168	0.055071	0.997559	16:319822_G_C	Mono	rs112877257
African	16	321754	T	G	0.96792	0.053691	0.039463	0.173644	16:321754_T_G	Mono	rs183388202
African	16	324479	C	G	0.785978	-0.043895	0.018013	0.014837	16:324479_C_G	Mono	rs3752435
African	16	326773	A	G	0.767674	-0.007785	0.017994	0.665306	16:326773_A_G	Mono	rs73486221
African	16	336071	A	T	0.978238	-0.094566	0.076751	0.217886	16:336071_A_T	Mono	rs546817919
African	16	360148	C	T	0.869457	-0.042533	0.018284	0.020026	16:360148_C_T	Mono	rs55931984
African	16	408299	C	T	0.963588	-0.031604	0.033852	0.350496	16:408299_C_T	Mono	rs77621702
African	16	418154	G	C	0.969458	-0.025116	0.040817	0.538362	16:418154_G_C	Mono	rs150051846
African	16	4473077	T	C	0.801418	-0.000492	0.016825	0.97666	16:4473077_T_C	Mono	rs3948237
African	16	449659	G	A	0.448535	0.00433	0.01298	0.73867	16:449659_G_A	Mono	rs14293
African	16	450759	C	G	0.27147	-0.005986	0.015765	0.704165	16:450759_C_G	Mono	rs407983
African	16	617757	A	G	0.971202	0.014497	0.039758	0.715395	16:617757_A_G	Mono	rs115165076
African	16	66679	T	C	0.723711	0.032165	0.027563	0.243212	16:66679_T_C	Mono	rs575317242
African	16	68704	C	T	0.966061	-0.010963	0.065383	0.866821	16:68704_C_T	Mono	rs537557137
African	16	771108	C	A	0.654043	0.020503	0.01389	0.1399	16:771108_C_A	Mono	rs56085648
African	16	796508	G	T	0.889831	-0.035064	0.025806	0.174207	16:796508_G_T	Mono	rs182560663
African	16	817561	G	A	0.334292	-0.016304	0.017291	0.345711	16:817561_G_A	Mono	rs536284860
African	16	82334	G	A	0.986617	0.094037	0.06033	0.119057	16:82334_G_A	Mono	rs35391410
African	16	83562	C	T	0.92252	-0.022221	0.026932	0.409337	16:83562_C_T	Mono	rs2541685
African	16	85065	G	A	0.818037	0.008058	0.018793	0.668095	16:85065_G_A	Mono	rs3930588
African	16	858094	A	G	0.462841	0.017102	0.013224	0.195917	16:858094_A_G	Mono	rs72759417
African	16	85932730	C	A	0.939046	-0.140243	0.025686	4.88e-08	16:85932730_C_A	Mono	rs12325654
African	16	99565	G	A	0.985237	-0.005641	0.052367	0.914194	16:99565_G_A	Mono	rs150800825
African	17	38028634	G	T	0.614174	0.009662	0.012657	0.445247	17:38028634_G_T	Mono	rs11557467
African	19	16185559	G	A	0.905066	-0.009397	0.021713	0.665191	19:16185559_G_A	Mono	rs8109288
African	19	6802571	C	T	0.916886	-0.002699	0.022826	0.905865	19:6802571_C_T	Mono	rs8106212
African	1	100846956	T	C	0.151827	0.071173	0.02363	0.002605	1:100846956_T_C	Mono	rs565590
African	1	102502084	T	C	0.936152	-0.029777	0.029475	0.312366	1:102502084_T_C	Mono	rs12046299
African	1	103025218	T	C	0.444768	-0.028367	0.012512	0.023395	1:103025218_T_C	Mono	rs1589096
African	1	106081299	A	G	0.487305	-0.021437	0.012766	0.093108	1:106081299_A_G	Mono	rs1710774
African	1	107535806	T	A	0.73005	-0.051654	0.014427	0.000346	1:107535806_T_A	Mono	rs9435338
African	1	109827253	A	G	0.468393	-0.037506	0.012873	0.003585	1:109827253_A_G	Mono	rs672569
African	1	110231777	G	A	0.921572	-0.106247	0.037081	0.00418	1:110231777_G_A	Mono	rs4147565
African	1	111100498	G	A	0.828033	-0.047257	0.018295	0.009812	1:111100498_G_A	Mono	rs11102131
African	1	111163693	C	T	0.747877	-0.055192	0.014946	0.000224	1:111163693_C_T	Mono	rs12132073
African	1	111748488	A	G	0.88956	0.017773	0.022523	0.43004	1:111748488_A_G	Mono	rs2783440
African	1	112320846	T	G	0.4098	0.022841	0.013005	0.079033	1:112320846_T_G	Mono	rs535183
African	1	112612098	G	A	0.630305	0.013478	0.01292	0.296846	1:112612098_G_A	Mono	rs269127
African	1	112767483	T	C	0.509986	0.021069	0.013189	0.110151	1:112767483_T_C	Mono	rs56693678
African	1	112824160	C	T	0.908647	-0.06534	0.023348	0.005148	1:112824160_C_T	Mono	rs4073809
African	1	112941134	G	A	0.55594	0.028698	0.012746	0.024375	1:112941134_G_A	Mono	rs2492508
African	1	113022434	A	G	0.520472	0.020725	0.012614	0.100388	1:113022434_A_G	Mono	rs10857956
African	1	113085721	A	C	0.192561	0.050336	0.019034	0.008197	1:113085721_A_C	Mono	rs4838959
African	1	113344299	G	A	0.479523	-0.038418	0.012968	0.003062	1:113344299_G_A	Mono	rs10745336
African	1	113874773	T	G	0.955261	-0.108567	0.033144	0.00106	1:113874773_T_G	Mono	rs1935746
African	1	114078037	A	G	0.641704	-0.030259	0.013488	0.024897	1:114078037_A_G	Mono	rs12026423
African	1	114671733	C	A	0.907429	0.067329	0.02159	0.001826	1:114671733_C_A	Mono	rs79356431
African	1	114681932	T	C	0.092468	0.072716	0.042354	0.086012	1:114681932_T_C	Mono	rs2629808
African	1	115618547	T	C	0.943106	-0.100861	0.029474	0.000625	1:115618547_T_C	Mono	rs4839022
African	1	115734289	G	A	0.756432	-0.034127	0.015036	0.023249	1:115734289_G_A	Mono	rs195203
African	1	116083584	C	T	0.686264	0.04251	0.013295	0.001393	1:116083584_C_T	Mono	rs6672158
African	1	116416579	C	T	0.928462	-0.038831	0.026958	0.149733	1:116416579_C_T	Mono	rs10923690
African	1	116724459	A	G	0.527157	0.030623	0.012396	0.013516	1:116724459_A_G	Mono	rs911221
African	1	116886547	G	T	0.518005	0.02608	0.012667	0.039526	1:116886547_G_T	Mono	rs6701849
African	1	116923792	A	G	0.416166	0.027798	0.012917	0.031412	1:116923792_A_G	Mono	rs6428896
African	1	117554421	A	G	0.917493	-0.071652	0.024547	0.003523	1:117554421_A_G	Mono	rs3754112
African	1	117728652	A	G	0.715527	-0.028718	0.014369	0.045667	1:117728652_A_G	Mono	rs10047089
African	1	117771515	C	T	0.436751	-0.028224	0.01268	0.026045	1:117771515_C_T	Mono	rs10754343
African	1	117793269	T	A	0.400854	0.045913	0.01362	0.000753	1:117793269_T_A	Mono	rs6428700
African	1	118126591	C	T	0.2768	0.036465	0.015744	0.020575	1:118126591_C_T	Mono	rs861152
African	1	118282130	A	C	0.850939	-0.060325	0.018034	0.000827	1:118282130_A_C	Mono	rs12137791
African	1	119054510	T	A	0.856954	-0.03289	0.018952	0.082668	1:119054510_T_A	Mono	rs7519196
African	1	119992162	C	G	0.83007	-0.051963	0.017994	0.003892	1:119992162_C_G	Mono	rs12039340
African	1	120021503	T	G	0.506203	0.019193	0.012495	0.124508	1:120021503_T_G	Mono	rs74525369
African	1	121153366	G	C	0.830049	-0.054759	0.02118	0.009747	1:121153366_G_C	Mono	rs2003134
African	1	121429112	C	G	0.346193	-0.037249	0.019801	0.059955	1:121429112_C_G	Mono	rs200129125
African	1	143396820	T	C	0.076344	0.0655	0.049413	0.184969	1:143396820_T_C	Mono	rs3105533
African	1	143734242	C	T	0.884462	-0.020487	0.038028	0.590092	1:143734242_C_T	Mono	rs12132106
African	1	145554450	T	C	0.927688	-0.045021	0.027132	0.097043	1:145554450_T_C	Mono	rs12125340
African	1	145560476	G	A	0.341199	0.034935	0.013996	0.012578	1:145560476_G_A	Mono	rs10797650
African	1	146589758	C	T	0.417656	0.038025	0.012895	0.003201	1:146589758_C_T	Mono	rs750467
African	1	146817245	A	T	0.486035	-0.050814	0.012267	3.48e-05	1:146817245_A_T	Mono	rs6693667
African	1	147003202	G	T	0.934423	-0.054378	0.028269	0.054423	1:147003202_G_T	Mono	rs112530376
African	1	147013836	A	C	0.338514	0.025006	0.013888	0.071772	1:147013836_A_C	Mono	rs594132
African	1	147056280	C	A	0.612178	-0.050358	0.013328	0.000159	1:147056280_C_A	Mono	rs628928
African	1	147220045	C	A	0.947969	-0.066442	0.030468	0.029228	1:147220045_C_A	Mono	rs12032789
African	1	147381558	G	A	0.489835	-0.035374	0.014207	0.012796	1:147381558_G_A	Mono	rs2132397
African	1	147797417	G	A	0.503632	-0.040548	0.013302	0.00231	1:147797417_G_A	Mono	rs2105069
African	1	149868334	C	T	0.522235	0.043289	0.013189	0.001035	1:149868334_C_T	Mono	rs12062387
African	1	149892872	A	G	0.876151	-0.049432	0.021071	0.019001	1:149892872_A_G	Mono	rs11205277
African	1	150047928	T	C	0.384253	-0.035532	0.013093	0.006669	1:150047928_T_C	Mono	rs10888571
African	1	150202423	A	G	0.684426	0.03488	0.013389	0.009202	1:150202423_A_G	Mono	rs11205344
African	1	150244046	G	A	0.71481	0.007357	0.013758	0.592835	1:150244046_G_A	Mono	rs73011380
African	1	150672262	T	C	0.385796	-0.024026	0.012854	0.061624	1:150672262_T_C	Mono	rs1932864
African	1	151118035	C	G	0.381336	0.009894	0.01338	0.459637	1:151118035_C_G	Mono	rs11204782
African	1	151343545	T	C	0.85947	-0.04279	0.018577	0.021278	1:151343545_T_C	Mono	rs61818027
African	1	151445752	C	T	0.570023	-0.027262	0.01317	0.038477	1:151445752_C_T	Mono	rs10888415
African	1	151692483	A	G	0.800428	-0.073152	0.016186	6.28e-06	1:151692483_A_G	Mono	rs6683687
African	1	151737129	A	G	0.761654	0.026828	0.014351	0.061569	1:151737129_A_G	Mono	rs61186168
African	1	152007599	T	C	0.730956	0.030921	0.013579	0.022798	1:152007599_T_C	Mono	rs3007676
African	1	152161103	T	G	0.37729	-0.054392	0.012836	2.29e-05	1:152161103_T_G	Mono	rs1390489
African	1	152391282	C	A	0.575016	-0.032117	0.01245	0.009906	1:152391282_C_A	Mono	rs4845766
African	1	152552285	C	A	0.821604	-0.010271	0.016256	0.527514	1:152552285_C_A	Mono	rs512208
African	1	152558146	G	A	0.883886	0.027107	0.020477	0.185566	1:152558146_G_A	Mono	rs76340524
African	1	152779534	A	T	0.848387	-0.030798	0.018222	0.090999	1:152779534_A_T	Mono	rs28649970
African	1	152887237	T	C	0.541625	0.052687	0.012501	2.53e-05	1:152887237_T_C	Mono	rs6587711
African	1	152946894	A	G	0.788742	0.039118	0.015027	0.009254	1:152946894_A_G	Mono	rs10159262
African	1	153065287	A	C	0.470041	0.014445	0.012839	0.260526	1:153065287_A_C	Mono	rs3843257
African	1	153143504	C	G	0.551266	0.033573	0.01281	0.008791	1:153143504_C_G	Mono	rs498131
African	1	153200987	C	T	0.866329	-0.057013	0.019131	0.002891	1:153200987_C_T	Mono	rs12081567
African	1	153334077	C	A	0.802923	0.037846	0.016564	0.022346	1:153334077_C_A	Mono	rs3014869
African	1	153337943	G	A	0.899114	-0.021942	0.021849	0.315251	1:153337943_G_A	Mono	rs3014874
African	1	153390542	G	C	0.612412	0.039581	0.013413	0.003179	1:153390542_G_C	Mono	rs3006412
African	1	153459023	C	T	0.562758	-0.022046	0.013199	0.094869	1:153459023_C_T	Mono	rs7535089
African	1	153530231	T	A	0.660406	0.035332	0.013474	0.008754	1:153530231_T_A	Mono	rs28689606
African	1	153630726	T	C	0.690409	0.025617	0.013528	0.058294	1:153630726_T_C	Mono	rs58379041
African	1	154044453	T	C	0.959003	-0.121935	0.042071	0.003763	1:154044453_T_C	Mono	rs113462784
African	1	154206358	T	C	0.976323	-0.215646	0.044962	1.64e-06	1:154206358_T_C	Mono	rs12027999
African	1	154292348	G	A	0.245824	0.040573	0.015966	0.011067	1:154292348_G_A	Mono	rs1685606
African	1	154342517	C	T	0.944491	-0.086588	0.031609	0.006172	1:154342517_C_T	Mono	rs79438587
African	1	154407419	A	C	0.77653	-0.031239	0.015222	0.040167	1:154407419_A_C	Mono	rs7518199
African	1	154440604	T	C	0.841113	0.020536	0.017115	0.230164	1:154440604_T_C	Mono	rs41308415
African	1	154665606	T	C	0.965291	-0.09588	0.041027	0.019462	1:154665606_T_C	Mono	rs57541561
African	1	154726546	G	C	0.837359	-0.030291	0.018045	0.093232	1:154726546_G_C	Mono	rs10494300
African	1	154731622	C	T	0.903241	-0.047147	0.022546	0.036533	1:154731622_C_T	Mono	rs12038684
African	1	154763613	G	T	0.914928	-0.10153	0.023753	1.94e-05	1:154763613_G_T	Mono	rs113920303
African	1	154788815	C	T	0.768	0.060676	0.014881	4.6e-05	1:154788815_C_T	Mono	rs59517499
African	1	154822907	C	T	0.73029	-0.031391	0.014425	0.029568	1:154822907_C_T	Mono	rs906595
African	1	155008610	A	G	0.272135	0.03735	0.015072	0.013227	1:155008610_A_G	Mono	rs4845406
African	1	155129499	A	G	0.695748	0.021653	0.013472	0.10801	1:155129499_A_G	Mono	rs150587259
African	1	155682870	C	T	0.312685	0.041758	0.014253	0.003403	1:155682870_C_T	Mono	rs490608
African	1	156085375	T	C	0.523428	-0.06494	0.012565	2.41e-07	1:156085375_T_C	Mono	rs547915
African	1	156184659	T	G	0.788029	0.027367	0.015048	0.068979	1:156184659_T_G	Mono	rs7530415
African	1	156247481	C	T	0.87078	-0.038094	0.018827	0.043056	1:156247481_C_T	Mono	rs10908493
African	1	156361116	G	A	0.85779	0.066784	0.017847	0.000184	1:156361116_G_A	Mono	rs73010652
African	1	156407051	T	C	0.478978	0.020673	0.012991	0.111508	1:156407051_T_C	Mono	rs6665039
African	1	156484318	C	G	0.30496	0.049516	0.014148	0.000468	1:156484318_C_G	Mono	rs6427312
African	1	156613517	C	A	0.27331	-0.034412	0.015335	0.024858	1:156613517_C_A	Mono	rs4233511
African	1	156619135	A	T	0.261564	0.071761	0.016122	8.67e-06	1:156619135_A_T	Mono	rs4233512
African	1	156687576	C	T	0.259707	-0.056715	0.015974	0.000387	1:156687576_C_T	Mono	rs4661214
African	1	156819216	T	C	0.859686	0.078207	0.018394	2.15e-05	1:156819216_T_C	Mono	rs74118779
African	1	156833913	A	G	0.757516	0.060908	0.015239	6.48e-05	1:156833913_A_G	Mono	rs74118782
African	1	156838974	C	T	0.78899	0.039296	0.015699	0.012333	1:156838974_C_T	Mono	rs61813772
African	1	157016710	C	T	0.936799	-0.128333	0.026523	1.33e-06	1:157016710_C_T	Mono	rs11264606
African	1	157069154	A	G	0.504261	0.049167	0.012639	0.000101	1:157069154_A_G	Mono	rs16838075
African	1	157126453	C	G	0.927083	-0.087298	0.026354	0.00093	1:157126453_C_G	Mono	rs61799686
African	1	157140430	C	A	0.823423	0.040527	0.016274	0.012785	1:157140430_C_A	Mono	rs6657979
African	1	157154912	C	G	0.75121	0.055198	0.015268	0.000302	1:157154912_C_G	Mono	rs74119210
African	1	157275048	C	T	0.957979	-0.073787	0.035115	0.035634	1:157275048_C_T	Mono	rs12047109
African	1	157321422	C	T	0.347754	0.056462	0.013892	4.87e-05	1:157321422_C_T	Mono	rs9427263
African	1	157341048	A	G	0.808088	0.045418	0.015903	0.004304	1:157341048_A_G	Mono	rs12080330
African	1	157435230	G	A	0.497947	-0.043437	0.012638	0.000592	1:157435230_G_A	Mono	rs4111874
African	1	157479006	G	A	0.970801	-0.130968	0.05064	0.009721	1:157479006_G_A	Mono	rs4110937
African	1	157485275	T	G	0.585635	0.053419	0.01241	1.69e-05	1:157485275_T_G	Mono	rs3811036
African	1	157541674	A	C	0.309099	0.075817	0.014307	1.19e-07	1:157541674_A_C	Mono	rs849819
African	1	157820033	T	C	0.894952	0.027443	0.019987	0.169712	1:157820033_T_C	Mono	rs16839297
African	1	157979035	A	G	0.699915	0.040518	0.013592	0.002885	1:157979035_A_G	Mono	rs6680700
African	1	157991269	G	C	0.693747	0.036843	0.013362	0.005844	1:157991269_G_C	Mono	rs11264874
African	1	158024742	A	G	0.199905	-0.049317	0.017385	0.004571	1:158024742_A_G	Mono	rs7523161
African	1	158032447	T	G	0.188906	0.071734	0.019058	0.000169	1:158032447_T_G	Mono	rs6677623
African	1	158053170	A	G	0.581763	-0.001948	0.012394	0.875118	1:158053170_A_G	Mono	rs73024667
African	1	158084162	T	C	0.816564	0.040133	0.016288	0.013759	1:158084162_T_C	Mono	rs57035221
African	1	158108284	T	A	0.602715	0.047419	0.012961	0.000256	1:158108284_T_A	Mono	rs10908624
African	1	158265973	T	C	0.782906	0.041088	0.015182	0.006817	1:158265973_T_C	Mono	rs73023953
African	1	158365697	C	T	0.7322	0.038758	0.014593	0.007925	1:158365697_C_T	Mono	rs12405213
African	1	158398965	C	T	0.973286	-0.16938	0.043065	8.46e-05	1:158398965_C_T	Mono	rs144581779
African	1	158542883	G	A	0.828215	0.057669	0.016415	0.000446	1:158542883_G_A	Mono	rs55755372
African	1	158618455	G	A	0.869014	-0.048899	0.019649	0.012845	1:158618455_G_A	Mono	rs2246434
African	1	158644851	A	G	0.153264	-0.076561	0.020616	0.000206	1:158644851_A_G	Mono	rs703117
African	1	158679507	A	T	0.896607	0.013757	0.019845	0.488186	1:158679507_A_T	Mono	rs434260
African	1	158701660	A	C	0.946959	-0.0827	0.028318	0.003507	1:158701660_A_C	Mono	rs77800865
African	1	158785094	C	T	0.662803	-0.031772	0.013034	0.014807	1:158785094_C_T	Mono	rs857786
African	1	158833656	G	T	0.123732	0.145166	0.029764	1.09e-06	1:158833656_G_T	Mono	rs2820126
African	1	158903759	T	G	0.347276	-0.075566	0.017055	9.52e-06	1:158903759_T_G	Mono	rs1772397
African	1	158907751	A	C	0.960357	-0.13296	0.036838	0.000309	1:158907751_A_C	Mono	rs113812917
African	1	158912448	G	A	0.181509	-0.060023	0.01889	0.001493	1:158912448_G_A	Mono	rs856081
African	1	158950333	T	C	0.26761	-0.079056	0.01439	4.02e-08	1:158950333_T_C	Mono	rs856138
African	1	158980645	G	A	0.212879	-0.059508	0.016388	0.000284	1:158980645_G_A	Mono	rs864439
African	1	159162922	G	A	0.708332	0.033162	0.013792	0.016217	1:159162922_G_A	Mono	rs2852717
African	1	159252040	G	T	0.932993	0.062258	0.024302	0.010433	1:159252040_G_T	Mono	rs16841975
African	1	159511202	C	T	0.45144	-0.075346	0.012622	2.45e-09	1:159511202_C_T	Mono	rs4465205
African	1	159608533	T	C	0.812823	0.041697	0.015666	0.007794	1:159608533_T_C	Mono	rs74122971
African	1	159737983	C	T	0.864654	0.072863	0.019031	0.00013	1:159737983_C_T	Mono	rs10159314
African	1	159768918	C	T	0.948974	-0.026292	0.030279	0.385214	1:159768918_C_T	Mono	rs72700611
African	1	159782360	G	A	0.873923	0.057685	0.019006	0.002414	1:159782360_G_A	Mono	rs77142732
African	1	159800098	A	G	0.78404	0.034955	0.015597	0.025042	1:159800098_A_G	Mono	rs41317533
African	1	159815940	G	T	0.134365	0.109155	0.025746	2.27e-05	1:159815940_G_T	Mono	rs2501353
African	1	159818817	T	C	0.877358	0.089362	0.020672	1.56e-05	1:159818817_T_C	Mono	rs2501345
African	1	159884207	G	C	0.762271	0.055641	0.015122	0.000236	1:159884207_G_C	Mono	rs12067321
African	1	159927907	T	C	0.744774	0.026063	0.014476	0.071803	1:159927907_T_C	Mono	rs12144158
African	1	160009121	A	C	0.40972	0.028639	0.013106	0.028897	1:160009121_A_C	Mono	rs1053074
African	1	160038698	G	A	0.879782	0.044725	0.019846	0.024244	1:160038698_G_A	Mono	rs80298170
African	1	160125463	T	C	0.788569	0.050188	0.015648	0.001346	1:160125463_T_C	Mono	rs16831449
African	1	160145688	C	G	0.221073	0.041405	0.016256	0.010884	1:160145688_C_G	Mono	rs1884996
African	1	160158031	G	A	0.835046	0.025179	0.01764	0.153452	1:160158031_G_A	Mono	rs76138322
African	1	160162872	A	G	0.849306	-0.086213	0.018293	2.48e-06	1:160162872_A_G	Mono	rs617698
African	1	160206394	G	A	0.734652	-0.064614	0.014205	5.48e-06	1:160206394_G_A	Mono	rs9633341
African	1	160489974	A	G	0.33986	-0.050987	0.013409	0.000145	1:160489974_A_G	Mono	rs3845627
African	1	160651728	A	G	0.738419	0.071086	0.014878	1.8e-06	1:160651728_A_G	Mono	rs16832311
African	1	160666350	A	G	0.337143	-0.025747	0.013748	0.061113	1:160666350_A_G	Mono	rs504716
African	1	160729163	G	C	0.970266	-0.252039	0.042169	2.34e-09	1:160729163_G_C	Mono	rs11265475
African	1	160736598	T	C	0.284777	-0.064228	0.014282	6.99e-06	1:160736598_T_C	Mono	rs492484
African	1	160773029	G	A	0.89422	-0.07611	0.020941	0.000281	1:160773029_G_A	Mono	rs1961611
African	1	161225699	G	C	0.876682	0.062785	0.019754	0.001488	1:161225699_G_C	Mono	rs543799247
African	1	161475750	G	A	0.968975	-0.138203	0.040576	0.000663	1:161475750_G_A	Mono	rs10494360
African	1	161481546	T	C	0.829625	0.037205	0.017624	0.034783	1:161481546_T_C	Mono	rs114926793
African	1	161567067	T	A	0.542429	-0.041675	0.01424	0.003438	1:161567067_T_A	Mono	rs61801824
African	1	161595730	C	A	0.704727	-0.044368	0.015772	0.00492	1:161595730_C_A	Mono	rs143596860
African	1	161698125	C	T	0.897783	0.035659	0.020083	0.075803	1:161698125_C_T	Mono	rs113563530
African	1	161708194	T	G	0.734227	0.061835	0.014203	1.36e-05	1:161708194_T_G	Mono	rs10799941
African	1	162061209	C	T	0.690298	0.042457	0.013295	0.001413	1:162061209_C_T	Mono	rs16851902
African	1	162177803	G	A	0.295186	-0.043515	0.01396	0.001834	1:162177803_G_A	Mono	rs4656359
African	1	162322803	G	A	0.765876	0.052423	0.014943	0.000454	1:162322803_G_A	Mono	rs1848843
African	1	162335256	C	T	0.592036	0.034255	0.012661	0.006834	1:162335256_C_T	Mono	rs348624
African	1	162367874	G	T	0.966565	-0.14121	0.037745	0.000185	1:162367874_G_T	Mono	rs61809468
African	1	162446878	G	A	0.729213	0.039216	0.014498	0.006848	1:162446878_G_A	Mono	rs469951
African	1	162606728	T	C	0.717231	-0.064922	0.014164	4.64e-06	1:162606728_T_C	Mono	rs4656375
African	1	162650763	G	A	0.709585	0.044438	0.013622	0.001111	1:162650763_G_A	Mono	rs72709727
African	1	162827240	T	G	0.797058	0.025586	0.015372	0.096028	1:162827240_T_G	Mono	rs11585029
African	1	162852760	C	T	0.480309	-0.030268	0.012408	0.014735	1:162852760_C_T	Mono	rs4657233
African	1	162929447	G	T	0.153528	0.053085	0.023051	0.021306	1:162929447_G_T	Mono	rs10732281
African	1	162970868	A	T	0.916272	0.070768	0.024551	0.003958	1:162970868_A_T	Mono	rs112616660
African	1	163072899	G	A	0.885728	-0.080704	0.020345	7.36e-05	1:163072899_G_A	Mono	rs2661299
African	1	163123382	G	A	0.856675	-0.033114	0.018063	0.066777	1:163123382_G_A	Mono	rs6664123
African	1	163216705	A	G	0.902424	0.065263	0.021908	0.002903	1:163216705_A_G	Mono	rs2814369
African	1	163217392	G	A	0.965581	-0.142164	0.040307	0.000423	1:163217392_G_A	Mono	rs114466359
African	1	163241577	G	A	0.918365	-0.044203	0.023562	0.060661	1:163241577_G_A	Mono	rs61812168
African	1	163345829	C	T	0.881986	-0.104897	0.02189	1.68e-06	1:163345829_C_T	Mono	rs10917739
African	1	163513839	G	A	0.885987	0.048644	0.022357	0.029591	1:163513839_G_A	Mono	rs12067389
African	1	163579955	T	C	0.923963	-0.075902	0.026466	0.004144	1:163579955_T_C	Mono	rs2791149
African	1	163590197	T	C	0.823909	-0.065555	0.017119	0.00013	1:163590197_T_C	Mono	rs7541708
African	1	163855599	C	T	0.577149	0.037202	0.012643	0.003267	1:163855599_C_T	Mono	rs7520589
African	1	164068531	C	T	0.844273	-0.079796	0.017924	8.63e-06	1:164068531_C_T	Mono	rs12139028
African	1	164392501	A	G	0.561954	0.042056	0.01229	0.000626	1:164392501_A_G	Mono	rs2821398
African	1	164492154	C	T	0.915113	-0.05567	0.023833	0.019522	1:164492154_C_T	Mono	rs12402920
African	1	164540861	A	G	0.491171	0.066308	0.013544	9.97e-07	1:164540861_A_G	Mono	rs200773115
African	1	164609305	T	C	0.37761	-0.031405	0.01373	0.022201	1:164609305_T_C	Mono	rs1780349
African	1	164735436	G	T	0.400527	-0.054265	0.013056	3.27e-05	1:164735436_G_T	Mono	rs1780360
African	1	164764500	G	A	0.835767	-0.046502	0.017098	0.006551	1:164764500_G_A	Mono	rs4657375
African	1	164934507	T	G	0.389501	-0.015008	0.013006	0.248494	1:164934507_T_G	Mono	rs1361843
African	1	165117049	T	C	0.167207	0.069025	0.020275	0.000667	1:165117049_T_C	Mono	rs4657405
African	1	165189595	G	A	0.965604	-0.14474	0.038132	0.000148	1:165189595_G_A	Mono	rs61800524
African	1	165196183	T	C	0.322827	-0.041847	0.013788	0.002415	1:165196183_T_C	Mono	rs2221418
African	1	165393753	G	T	0.718425	-0.043317	0.014095	0.002127	1:165393753_G_T	Mono	rs3753896
African	1	165562982	C	T	0.737878	-0.032685	0.01423	0.021643	1:165562982_C_T	Mono	rs1538116
African	1	165605310	A	G	0.229355	0.046537	0.016201	0.004085	1:165605310_A_G	Mono	rs10800120
African	1	165743761	G	C	0.757989	-0.026919	0.015132	0.075262	1:165743761_G_C	Mono	rs61800457
African	1	166640635	T	C	0.615932	0.038844	0.012533	0.001948	1:166640635_T_C	Mono	rs472293
African	1	166976836	A	G	0.441738	0.030412	0.012678	0.016468	1:166976836_A_G	Mono	rs66805418
African	1	167164887	A	G	0.412526	-0.03619	0.013417	0.007004	1:167164887_A_G	Mono	rs3931265
African	1	167420425	T	G	0.86789	-0.053343	0.01915	0.005359	1:167420425_T_G	Mono	rs2056626
African	1	167667620	C	T	0.454773	0.035782	0.012898	0.005549	1:167667620_C_T	Mono	rs13374598
African	1	168355541	C	G	0.259921	0.080513	0.016471	1.04e-06	1:168355541_C_G	Mono	rs909638
African	1	172332009	A	G	0.649967	-0.030215	0.013517	0.025412	1:172332009_A_G	Mono	rs979935
African	1	173163568	A	G	0.254491	0.041162	0.015912	0.009702	1:173163568_A_G	Mono	rs7518129
African	1	174242805	G	A	0.333589	0.035991	0.013847	0.00936	1:174242805_G_A	Mono	rs10912754
African	1	178097515	G	A	0.696171	-0.04505	0.014022	0.001321	1:178097515_G_A	Mono	rs451341
African	1	43771880	G	A	0.968198	-0.015372	0.035864	0.668223	1:43771880_G_A	Mono	rs74069551
African	1	94980123	G	A	0.931032	-0.104323	0.027812	0.000178	1:94980123_G_A	Mono	rs72729511
African	2	135777869	G	A	0.976146	-0.087962	0.040505	0.029903	2:135777869_G_A	Mono	rs140516485
African	2	182308352	A	G	0.385459	-0.117727	0.012838	5.01e-20	2:182308352_A_G	Mono	rs6740847
African	2	182318491	G	A	0.851644	0.109879	0.017801	6.92e-10	2:182318491_G_A	Mono	rs72894360
African	2	46308680	A	G	0.259999	-0.015467	0.016051	0.335213	2:46308680_A_G	Mono	rs11690784
African	3	128330526	T	C	0.38477	-0.071312	0.012668	1.86e-08	3:128330526_T_C	Mono	rs67445542
African	3	183857545	C	G	0.924974	-0.040315	0.02401	0.093136	3:183857545_C_G	Mono	rs141985150
African	3	184094724	T	C	0.811531	0.007697	0.015593	0.621614	3:184094724_T_C	Mono	rs13084750
African	3	56849749	T	C	0.73735	-0.008195	0.014426	0.57	3:56849749_T_C	Mono	rs1354034
African	5	95162889	G	A	0.946065	-0.019791	0.027725	0.475329	5:95162889_G_A	Mono	rs4869251
African	6	135419018	T	C	0.940579	-0.039925	0.028599	0.162689	6:135419018_T_C	Mono	rs9399137
African	6	139831180	G	A	0.539591	0.002126	0.012331	0.863068	6:139831180_G_A	Mono	rs679582
African	6	143558736	T	A	0.964733	0.112639	0.033745	0.000849	6:143558736_T_A	Mono	rs73594114
African	6	33482146	C	G	0.449241	-0.004444	0.012757	0.727584	6:33482146_C_G	Mono	rs210194
African	7	106366781	G	A	0.50604	-0.000945	0.012318	0.938799	7:106366781_G_A	Mono	rs10278865
African	7	28711319	G	A	0.869376	-0.059295	0.019697	0.002619	7:28711319_G_A	Mono	rs73304938
African	7	80219147	G	C	0.806665	-0.018666	0.015486	0.228059	7:80219147_G_C	Mono	rs79957681
African	7	92387918	T	C	0.846578	0.068068	0.016808	5.18e-05	7:92387918_T_C	Mono	rs6970319
African	8	130602281	A	C	0.496537	0.073065	0.012553	6.03e-09	8:130602281_A_C	Mono	rs10103048
African	8	86154040	A	G	0.909526	0.03295	0.020919	0.115224	8:86154040_A_G	Mono	rs75562449
African	9	91505937	G	A	0.852049	0.151846	0.017441	3.32e-18	9:91505937_G_A	Mono	rs12345705
African	10	64862314	T	G	0.574938	-0.01229	0.013417	0.359653	10:64862314_T_G	Baso	rs4363488
African	11	3953878	C	T	0.973249	-0.042295	0.041082	0.303224	11:3953878_C_T	Baso	rs112706563
African	11	4947734	T	G	0.975356	-0.009325	0.043529	0.830365	11:4947734_T_G	Baso	rs59618482
African	11	5214857	A	G	0.44872	-0.003326	0.013606	0.806858	11:5214857_A_G	Baso	rs7482866
African	11	5259768	A	G	0.71624	0.034934	0.015186	0.021448	11:5259768_A_G	Baso	rs10488681
African	11	5306996	C	T	0.960677	-0.027292	0.035429	0.441122	11:5306996_C_T	Baso	rs112915912
African	11	63698035	T	A	0.375384	0.000473	0.013837	0.972731	11:63698035_T_A	Baso	rs11231642
African	12	111843000	T	C	0.864363	0.006624	0.019374	0.732433	12:111843000_T_C	Baso	rs114985662
African	13	113969390	T	C	0.507359	0.014752	0.013657	0.280016	13:113969390_T_C	Baso	rs7326696
African	14	64692465	T	C	0.46656	-0.019728	0.013306	0.138162	14:64692465_T_C	Baso	rs1048315
African	16	108585	T	C	0.127776	-0.014781	0.029493	0.616277	16:108585_T_C	Baso	rs216598
African	16	130429	G	C	0.95743	-0.00706	0.033246	0.83181	16:130429_G_C	Baso	rs3176399
African	16	136142	C	T	0.137762	0.006869	0.026149	0.792806	16:136142_C_T	Baso	rs2541623
African	16	143503	C	T	0.893837	-0.004973	0.021937	0.820645	16:143503_C_T	Baso	rs6600233
African	16	174926	A	C	0.879945	-0.021135	0.020322	0.298332	16:174926_A_C	Baso	rs34291820
African	16	2028402	A	C	0.399356	0.00702	0.014087	0.618254	16:2028402_A_C	Baso	rs8460
African	16	207373	A	T	0.95436	0.058846	0.032841	0.073168	16:207373_A_T	Baso	rs538965378
African	16	225185	A	G	0.984593	0.064771	0.063733	0.309479	16:225185_A_G	Baso	rs555255920
African	16	3004161	T	A	0.166251	0.000825	0.022012	0.9701	16:3004161_T_A	Baso	rs4785921
African	16	304514	C	T	0.869257	-0.010791	0.0196	0.581935	16:304514_C_T	Baso	rs3213508
African	16	319822	G	C	0.983427	0.030969	0.057166	0.588024	16:319822_G_C	Baso	rs112877257
African	16	321754	T	G	0.965661	0.090397	0.041411	0.029064	16:321754_T_G	Baso	rs183388202
African	16	324479	C	G	0.77819	-0.012685	0.019182	0.508463	16:324479_C_G	Baso	rs3752435
African	16	326773	A	G	0.754952	-0.037808	0.019048	0.047172	16:326773_A_G	Baso	rs73486221
African	16	336071	A	T	0.978159	0.011454	0.07441	0.877642	16:336071_A_T	Baso	rs546817919
African	16	360148	C	T	0.861161	-0.017319	0.019321	0.37004	16:360148_C_T	Baso	rs55931984
African	16	408299	C	T	0.962565	-0.053258	0.036074	0.139838	16:408299_C_T	Baso	rs77621702
African	16	418154	G	C	0.966815	0.022235	0.042954	0.604732	16:418154_G_C	Baso	rs150051846
African	16	4473077	T	C	0.834109	0.013586	0.018171	0.454649	16:4473077_T_C	Baso	rs3948237
African	16	449659	G	A	0.438833	0.020647	0.013739	0.132893	16:449659_G_A	Baso	rs14293
African	16	450759	C	G	0.257823	0.006178	0.016771	0.712581	16:450759_C_G	Baso	rs407983
African	16	617757	A	G	0.969197	0.003999	0.042062	0.924237	16:617757_A_G	Baso	rs115165076
African	16	66679	T	C	0.723723	-0.023201	0.026806	0.386748	16:66679_T_C	Baso	rs575317242
African	16	68704	C	T	0.966075	-0.054208	0.063645	0.394367	16:68704_C_T	Baso	rs537557137
African	16	771108	C	A	0.659086	0.029226	0.014679	0.046494	16:771108_C_A	Baso	rs56085648
African	16	796508	G	T	0.880388	-0.017304	0.026982	0.521339	16:796508_G_T	Baso	rs182560663
African	16	817561	G	A	0.294973	-0.007056	0.018496	0.70286	16:817561_G_A	Baso	rs536284860
African	16	82334	G	A	0.986028	-0.011379	0.061297	0.852721	16:82334_G_A	Baso	rs35391410
African	16	83562	C	T	0.919472	-0.055893	0.027872	0.044945	16:83562_C_T	Baso	rs2541685
African	16	85065	G	A	0.81009	-0.020004	0.020108	0.31981	16:85065_G_A	Baso	rs3930588
African	16	858094	A	G	0.442288	0.014022	0.014128	0.320952	16:858094_A_G	Baso	rs72759417
African	16	85932730	C	A	0.935601	-0.009144	0.027235	0.737063	16:85932730_C_A	Baso	rs12325654
African	16	99565	G	A	0.984192	0.006623	0.055308	0.904658	16:99565_G_A	Baso	rs150800825
African	17	38028634	G	T	0.620278	0.029529	0.013418	0.027776	17:38028634_G_T	Baso	rs11557467
African	19	16185559	G	A	0.900804	0.028842	0.023088	0.211573	19:16185559_G_A	Baso	rs8109288
African	19	6802571	C	T	0.912798	-0.019037	0.023926	0.426232	19:6802571_C_T	Baso	rs8106212
African	1	100846956	T	C	0.139246	-0.021407	0.025931	0.409078	1:100846956_T_C	Baso	rs565590
African	1	102502084	T	C	0.952692	0.02669	0.032897	0.41719	1:102502084_T_C	Baso	rs12046299
African	1	103025218	T	C	0.468449	-0.000764	0.013193	0.953825	1:103025218_T_C	Baso	rs1589096
African	1	106081299	A	G	0.505552	-0.039415	0.013585	0.003729	1:106081299_A_G	Baso	rs1710774
African	1	107535806	T	A	0.755612	-0.017676	0.015469	0.253138	1:107535806_T_A	Baso	rs9435338
African	1	109827253	A	G	0.490793	-0.011087	0.013688	0.417958	1:109827253_A_G	Baso	rs672569
African	1	110231777	G	A	0.954363	0.05378	0.044215	0.22384	1:110231777_G_A	Baso	rs4147565
African	1	111100498	G	A	0.848892	0.016217	0.019791	0.412546	1:111100498_G_A	Baso	rs11102131
African	1	111163693	C	T	0.776369	0.003261	0.016029	0.8388	1:111163693_C_T	Baso	rs12132073
African	1	111748488	A	G	0.904403	-0.0133	0.024445	0.586406	1:111748488_A_G	Baso	rs2783440
African	1	112320846	T	G	0.388097	0.016969	0.013858	0.220722	1:112320846_T_G	Baso	rs535183
African	1	112612098	G	A	0.605454	-0.005206	0.013636	0.702648	1:112612098_G_A	Baso	rs269127
African	1	112767483	T	C	0.478732	-0.001892	0.013943	0.892021	1:112767483_T_C	Baso	rs56693678
African	1	112824160	C	T	0.92146	0.002469	0.025554	0.922999	1:112824160_C_T	Baso	rs4073809
African	1	112941134	G	A	0.526615	0.011374	0.013481	0.398825	1:112941134_G_A	Baso	rs2492508
African	1	113022434	A	G	0.498148	0.013955	0.01327	0.292939	1:113022434_A_G	Baso	rs10857956
African	1	113085721	A	C	0.177082	0.032464	0.020713	0.117042	1:113085721_A_C	Baso	rs4838959
African	1	113344299	G	A	0.511411	0.010218	0.013781	0.458455	1:113344299_G_A	Baso	rs10745336
African	1	113874773	T	G	0.966767	-0.008574	0.036874	0.816129	1:113874773_T_G	Baso	rs1935746
African	1	114078037	A	G	0.668076	0.014952	0.014426	0.299979	1:114078037_A_G	Baso	rs12026423
African	1	114671733	C	A	0.90524	0.014625	0.022986	0.524637	1:114671733_C_A	Baso	rs79356431
African	1	114681932	T	C	0.095101	-0.032251	0.046315	0.486228	1:114681932_T_C	Baso	rs2629808
African	1	115618547	T	C	0.953689	-0.018016	0.032497	0.579326	1:115618547_T_C	Baso	rs4839022
African	1	115734289	G	A	0.781125	-0.02652	0.0161	0.099515	1:115734289_G_A	Baso	rs195203
African	1	116083584	C	T	0.665323	0.002736	0.014118	0.846344	1:116083584_C_T	Baso	rs6672158
African	1	116416579	C	T	0.945084	0.025234	0.029815	0.397346	1:116416579_C_T	Baso	rs10923690
African	1	116724459	A	G	0.49668	0.026003	0.013166	0.048285	1:116724459_A_G	Baso	rs911221
African	1	116886547	G	T	0.489009	0.002392	0.013422	0.85853	1:116886547_G_T	Baso	rs6701849
African	1	116923792	A	G	0.381111	-0.000122	0.013779	0.992959	1:116923792_A_G	Baso	rs6428896
African	1	117554421	A	G	0.932009	-0.010328	0.026752	0.699465	1:117554421_A_G	Baso	rs3754112
African	1	117728652	A	G	0.730677	0.001837	0.015279	0.904261	1:117728652_A_G	Baso	rs10047089
African	1	117771515	C	T	0.463628	-0.019075	0.01345	0.156131	1:117771515_C_T	Baso	rs10754343
African	1	117793269	T	A	0.375153	-0.013805	0.014465	0.339892	1:117793269_T_A	Baso	rs6428700
African	1	118126591	C	T	0.262651	0.007186	0.016832	0.669434	1:118126591_C_T	Baso	rs861152
African	1	118282130	A	C	0.870007	-0.00778	0.019431	0.68889	1:118282130_A_C	Baso	rs12137791
African	1	119054510	T	A	0.880202	-0.034457	0.020592	0.094262	1:119054510_T_A	Baso	rs7519196
African	1	119992162	C	G	0.852649	0.010534	0.019315	0.585493	1:119992162_C_G	Baso	rs12039340
African	1	120021503	T	G	0.47495	-0.003214	0.013257	0.808418	1:120021503_T_G	Baso	rs74525369
African	1	121153366	G	C	0.848266	-0.047326	0.022957	0.039277	1:121153366_G_C	Baso	rs2003134
African	1	121429112	C	G	0.346203	0.006754	0.019385	0.727544	1:121429112_C_G	Baso	rs200129125
African	1	143396820	T	C	0.076331	-0.067327	0.049637	0.174958	1:143396820_T_C	Baso	rs3105533
African	1	143734242	C	T	0.884432	0.052149	0.038199	0.172175	1:143734242_C_T	Baso	rs12132106
African	1	145554450	T	C	0.942728	-0.04447	0.029761	0.135094	1:145554450_T_C	Baso	rs12125340
African	1	145560476	G	A	0.322065	-0.002419	0.014803	0.87018	1:145560476_G_A	Baso	rs10797650
African	1	146589758	C	T	0.395908	-0.003246	0.013703	0.812751	1:146589758_C_T	Baso	rs750467
African	1	146817245	A	T	0.508314	-0.000677	0.012976	0.958345	1:146817245_A_T	Baso	rs6693667
African	1	147003202	G	T	0.945702	-0.086746	0.030985	0.00513	1:147003202_G_T	Baso	rs112530376
African	1	147013836	A	C	0.316964	-0.00233	0.01489	0.875637	1:147013836_A_C	Baso	rs594132
African	1	147056280	C	A	0.646879	-0.0021	0.014228	0.882639	1:147056280_C_A	Baso	rs628928
African	1	147220045	C	A	0.96064	0.003744	0.03389	0.912004	1:147220045_C_A	Baso	rs12032789
African	1	147381558	G	A	0.51662	0.017666	0.015474	0.253574	1:147381558_G_A	Baso	rs2132397
African	1	147797417	G	A	0.520461	-0.002487	0.014172	0.860678	1:147797417_G_A	Baso	rs2105069
African	1	149868334	C	T	0.494914	-0.014234	0.013977	0.308464	1:149868334_C_T	Baso	rs12062387
African	1	149892872	A	G	0.894836	0.007302	0.022984	0.750724	1:149892872_A_G	Baso	rs11205277
African	1	150047928	T	C	0.408614	-0.002112	0.013791	0.878296	1:150047928_T_C	Baso	rs10888571
African	1	150202423	A	G	0.661204	0.004632	0.0141	0.742548	1:150202423_A_G	Baso	rs11205344
African	1	150244046	G	A	0.695041	0.024122	0.014513	0.096494	1:150244046_G_A	Baso	rs73011380
African	1	150672262	T	C	0.408251	0.010036	0.013467	0.456137	1:150672262_T_C	Baso	rs1932864
African	1	151118035	C	G	0.357141	-0.022143	0.01419	0.118647	1:151118035_C_G	Baso	rs11204782
African	1	151343545	T	C	0.869679	0.01682	0.019934	0.398788	1:151343545_T_C	Baso	rs61818027
African	1	151445752	C	T	0.593707	-0.015405	0.014001	0.271208	1:151445752_C_T	Baso	rs10888415
African	1	151692483	A	G	0.819834	-0.031449	0.017377	0.070336	1:151692483_A_G	Baso	rs6683687
African	1	151737129	A	G	0.746096	0.005109	0.015128	0.735561	1:151737129_A_G	Baso	rs61186168
African	1	152007599	T	C	0.716112	0.022351	0.014251	0.116787	1:152007599_T_C	Baso	rs3007676
African	1	152161103	T	G	0.404204	-0.008469	0.01358	0.532863	1:152161103_T_G	Baso	rs1390489
African	1	152391282	C	A	0.59044	-0.017872	0.013187	0.175318	1:152391282_C_A	Baso	rs4845766
African	1	152552285	C	A	0.835246	0.012164	0.017465	0.486141	1:152552285_C_A	Baso	rs512208
African	1	152558146	G	A	0.879303	0.009779	0.021673	0.651844	1:152558146_G_A	Baso	rs76340524
African	1	152779534	A	T	0.859725	-0.026397	0.019523	0.176318	1:152779534_A_T	Baso	rs28649970
African	1	152887237	T	C	0.519881	0.009159	0.013307	0.491285	1:152887237_T_C	Baso	rs6587711
African	1	152946894	A	G	0.775765	-0.01302	0.015822	0.410566	1:152946894_A_G	Baso	rs10159262
African	1	153065287	A	C	0.450894	0.013948	0.013703	0.308746	1:153065287_A_C	Baso	rs3843257
African	1	153143504	C	G	0.533398	-0.00167	0.013562	0.901964	1:153143504_C_G	Baso	rs498131
African	1	153200987	C	T	0.875797	-0.053709	0.020591	0.009116	1:153200987_C_T	Baso	rs12081567
African	1	153334077	C	A	0.790191	-0.014285	0.01743	0.412455	1:153334077_C_A	Baso	rs3014869
African	1	153337943	G	A	0.910143	-0.017855	0.023683	0.450903	1:153337943_G_A	Baso	rs3014874
African	1	153390542	G	C	0.590885	0.006563	0.014081	0.64115	1:153390542_G_C	Baso	rs3006412
African	1	153459023	C	T	0.582321	0.014387	0.01404	0.305487	1:153459023_C_T	Baso	rs7535089
African	1	153530231	T	A	0.640609	-0.012126	0.014271	0.395494	1:153530231_T_A	Baso	rs28689606
African	1	153630726	T	C	0.674615	-0.013084	0.014286	0.359742	1:153630726_T_C	Baso	rs58379041
African	1	154044453	T	C	0.965767	0.027364	0.045848	0.550633	1:154044453_T_C	Baso	rs113462784
African	1	154206358	T	C	0.980081	0.025206	0.049115	0.60783	1:154206358_T_C	Baso	rs12027999
African	1	154292348	G	A	0.233765	0.012944	0.016991	0.446185	1:154292348_G_A	Baso	rs1685606
African	1	154342517	C	T	0.953038	0.017646	0.033543	0.598859	1:154342517_C_T	Baso	rs79438587
African	1	154407419	A	C	0.789507	0.008875	0.016273	0.585487	1:154407419_A_C	Baso	rs7518199
African	1	154440604	T	C	0.833171	-0.008539	0.018076	0.63667	1:154440604_T_C	Baso	rs41308415
African	1	154665606	T	C	0.971304	-0.025777	0.045049	0.567212	1:154665606_T_C	Baso	rs57541561
African	1	154726546	G	C	0.850181	-0.006653	0.019233	0.729397	1:154726546_G_C	Baso	rs10494300
African	1	154731622	C	T	0.909817	-0.026691	0.024324	0.272479	1:154731622_C_T	Baso	rs12038684
African	1	154763613	G	T	0.924983	0.016291	0.025535	0.523507	1:154763613_G_T	Baso	rs113920303
African	1	154788815	C	T	0.755303	-0.029016	0.015668	0.064048	1:154788815_C_T	Baso	rs59517499
African	1	154822907	C	T	0.743139	-0.001364	0.015391	0.929338	1:154822907_C_T	Baso	rs906595
African	1	155008610	A	G	0.262684	-0.003951	0.015951	0.804352	1:155008610_A_G	Baso	rs4845406
African	1	155129499	A	G	0.677864	0.016381	0.014208	0.248921	1:155129499_A_G	Baso	rs150587259
African	1	155682870	C	T	0.298117	-0.011713	0.015131	0.438894	1:155682870_C_T	Baso	rs490608
African	1	156085375	T	C	0.549296	-0.011292	0.013423	0.400202	1:156085375_T_C	Baso	rs547915
African	1	156184659	T	G	0.776961	0.015176	0.015795	0.336654	1:156184659_T_G	Baso	rs7530415
African	1	156247481	C	T	0.884081	0.002677	0.020165	0.894358	1:156247481_C_T	Baso	rs10908493
African	1	156361116	G	A	0.84882	0.013183	0.018815	0.483528	1:156361116_G_A	Baso	rs73010652
African	1	156407051	T	C	0.463636	0.007112	0.013704	0.603808	1:156407051_T_C	Baso	rs6665039
African	1	156484318	C	G	0.294422	0.028185	0.015141	0.062679	1:156484318_C_G	Baso	rs6427312
African	1	156613517	C	A	0.287635	-0.023699	0.016346	0.147106	1:156613517_C_A	Baso	rs4233511
African	1	156619135	A	T	0.244598	0.017104	0.017241	0.321139	1:156619135_A_T	Baso	rs4233512
African	1	156687576	C	T	0.275821	-0.011954	0.016906	0.479526	1:156687576_C_T	Baso	rs4661214
African	1	156819216	T	C	0.850429	0.028727	0.019313	0.136872	1:156819216_T_C	Baso	rs74118779
African	1	156833913	A	G	0.739003	0.015536	0.016053	0.333154	1:156833913_A_G	Baso	rs74118782
African	1	156838974	C	T	0.775736	-0.002022	0.016381	0.901746	1:156838974_C_T	Baso	rs61813772
African	1	157016710	C	T	0.945218	-0.058731	0.028684	0.040624	1:157016710_C_T	Baso	rs11264606
African	1	157069154	A	G	0.481751	-0.001685	0.013402	0.899933	1:157069154_A_G	Baso	rs16838075
African	1	157126453	C	G	0.936811	0.03283	0.028625	0.251396	1:157126453_C_G	Baso	rs61799686
African	1	157140430	C	A	0.814038	0.003472	0.01717	0.83972	1:157140430_C_A	Baso	rs6657979
African	1	157154912	C	G	0.736545	0.01872	0.016377	0.252998	1:157154912_C_G	Baso	rs74119210
African	1	157275048	C	T	0.964915	-0.036657	0.038443	0.340305	1:157275048_C_T	Baso	rs12047109
African	1	157321422	C	T	0.330931	0.001009	0.014757	0.94548	1:157321422_C_T	Baso	rs9427263
African	1	157341048	A	G	0.795268	-0.004507	0.016829	0.788858	1:157341048_A_G	Baso	rs12080330
African	1	157435230	G	A	0.515895	-0.00332	0.013338	0.803409	1:157435230_G_A	Baso	rs4111874
African	1	157479006	G	A	0.97593	-0.094273	0.05466	0.084582	1:157479006_G_A	Baso	rs4110937
African	1	157485275	T	G	0.563471	-0.005929	0.013087	0.650558	1:157485275_T_G	Baso	rs3811036
African	1	157541674	A	C	0.289849	-0.001034	0.015305	0.946102	1:157541674_A_C	Baso	rs849819
African	1	157820033	T	C	0.887302	0.009553	0.021048	0.649951	1:157820033_T_C	Baso	rs16839297
African	1	157979035	A	G	0.687935	0.019866	0.014338	0.165865	1:157979035_A_G	Baso	rs6680700
African	1	157991269	G	C	0.67402	0.011241	0.014055	0.423855	1:157991269_G_C	Baso	rs11264874
African	1	158024742	A	G	0.217397	0.013082	0.018317	0.475122	1:158024742_A_G	Baso	rs7523161
African	1	158032447	T	G	0.186384	0.019057	0.020547	0.353672	1:158032447_T_G	Baso	rs6677623
African	1	158053170	A	G	0.558762	-0.014624	0.013099	0.264218	1:158053170_A_G	Baso	rs73024667
African	1	158084162	T	C	0.804794	-0.01675	0.017089	0.327008	1:158084162_T_C	Baso	rs57035221
African	1	158108284	T	A	0.596999	-0.028044	0.013648	0.039915	1:158108284_T_A	Baso	rs10908624
African	1	158265973	T	C	0.768218	0.004814	0.016016	0.763725	1:158265973_T_C	Baso	rs73023953
African	1	158365697	C	T	0.716555	0.01719	0.015304	0.261319	1:158365697_C_T	Baso	rs12405213
African	1	158398965	C	T	0.978472	-0.056674	0.04676	0.225487	1:158398965_C_T	Baso	rs144581779
African	1	158542883	G	A	0.818362	-0.00855	0.017302	0.621239	1:158542883_G_A	Baso	rs55755372
African	1	158618455	G	A	0.877472	-0.010487	0.021245	0.62158	1:158618455_G_A	Baso	rs2246434
African	1	158644851	A	G	0.166611	0.02834	0.021703	0.191594	1:158644851_A_G	Baso	rs703117
African	1	158679507	A	T	0.889075	-0.024458	0.0209	0.241886	1:158679507_A_T	Baso	rs434260
African	1	158701660	A	C	0.95171	-0.017639	0.03041	0.561899	1:158701660_A_C	Baso	rs77800865
African	1	158785094	C	T	0.672168	0.008399	0.013812	0.543166	1:158785094_C_T	Baso	rs857786
African	1	158833656	G	T	0.124141	0.012024	0.032283	0.709574	1:158833656_G_T	Baso	rs2820126
African	1	158903759	T	G	0.368298	-0.029396	0.018106	0.104465	1:158903759_T_G	Baso	rs1772397
African	1	158907751	A	C	0.96617	-0.031525	0.040288	0.433925	1:158907751_A_C	Baso	rs113812917
African	1	158912448	G	A	0.199337	-0.054353	0.019751	0.00594	1:158912448_G_A	Baso	rs856081
African	1	158950333	T	C	0.291283	-0.00802	0.015096	0.59523	1:158950333_T_C	Baso	rs856138
African	1	158980645	G	A	0.23005	-0.0007	0.017245	0.967597	1:158980645_G_A	Baso	rs864439
African	1	159162922	G	A	0.690425	-0.000807	0.014587	0.955854	1:159162922_G_A	Baso	rs2852717
African	1	159252040	G	T	0.929603	0.022339	0.025994	0.390118	1:159252040_G_T	Baso	rs16841975
African	1	159511202	C	T	0.479707	-0.026056	0.013368	0.051291	1:159511202_C_T	Baso	rs4465205
African	1	159608533	T	C	0.798094	-0.016519	0.016495	0.316599	1:159608533_T_C	Baso	rs74122971
African	1	159737983	C	T	0.856178	0.022729	0.019841	0.251971	1:159737983_C_T	Baso	rs10159314
African	1	159768918	C	T	0.953805	-0.022714	0.032379	0.482991	1:159768918_C_T	Baso	rs72700611
African	1	159782360	G	A	0.867045	-0.001383	0.020007	0.944864	1:159782360_G_A	Baso	rs77142732
African	1	159800098	A	G	0.771211	0.001324	0.016182	0.934763	1:159800098_A_G	Baso	rs41317533
African	1	159815940	G	T	0.133756	0.022237	0.027844	0.424514	1:159815940_G_T	Baso	rs2501353
African	1	159818817	T	C	0.871602	-0.013096	0.021988	0.551471	1:159818817_T_C	Baso	rs2501345
African	1	159884207	G	C	0.749617	0.028876	0.015825	0.068064	1:159884207_G_C	Baso	rs12067321
African	1	159927907	T	C	0.736284	0.004288	0.015293	0.779163	1:159927907_T_C	Baso	rs12144158
African	1	160009121	A	C	0.397528	0.023748	0.013949	0.088683	1:160009121_A_C	Baso	rs1053074
African	1	160038698	G	A	0.871944	0.038106	0.021026	0.069948	1:160038698_G_A	Baso	rs80298170
African	1	160125463	T	C	0.775394	0.015868	0.016479	0.335577	1:160125463_T_C	Baso	rs16831449
African	1	160145688	C	G	0.219952	0.022617	0.017251	0.189824	1:160145688_C_G	Baso	rs1884996
African	1	160158031	G	A	0.827328	0.006065	0.018615	0.744564	1:160158031_G_A	Baso	rs76138322
African	1	160162872	A	G	0.868	-0.022255	0.019746	0.259709	1:160162872_A_G	Baso	rs617698
African	1	160206394	G	A	0.747491	-0.021897	0.015078	0.146412	1:160206394_G_A	Baso	rs9633341
African	1	160489974	A	G	0.358972	0.001586	0.014	0.909811	1:160489974_A_G	Baso	rs3845627
African	1	160651728	A	G	0.723604	0.008986	0.015997	0.574305	1:160651728_A_G	Baso	rs16832311
African	1	160666350	A	G	0.352932	-0.0343	0.0146	0.018832	1:160666350_A_G	Baso	rs504716
African	1	160729163	G	C	0.976411	-0.077308	0.047324	0.102341	1:160729163_G_C	Baso	rs11265475
African	1	160736598	T	C	0.303988	0.002479	0.015083	0.869434	1:160736598_T_C	Baso	rs492484
African	1	160773029	G	A	0.905056	-0.020333	0.022596	0.368209	1:160773029_G_A	Baso	rs1961611
African	1	161225699	G	C	0.870108	0.015193	0.020816	0.465487	1:161225699_G_C	Baso	rs543799247
African	1	161475750	G	A	0.975339	-0.046628	0.044672	0.296568	1:161475750_G_A	Baso	rs10494360
African	1	161481546	T	C	0.820389	-0.005735	0.018528	0.756932	1:161481546_T_C	Baso	rs114926793
African	1	161567067	T	A	0.554148	-0.01199	0.015169	0.429288	1:161567067_T_A	Baso	rs61801824
African	1	161595730	C	A	0.722578	-0.010614	0.017003	0.532479	1:161595730_C_A	Baso	rs143596860
African	1	161698125	C	T	0.891876	0.001563	0.021134	0.941007	1:161698125_C_T	Baso	rs113563530
African	1	161708194	T	G	0.719918	0.023405	0.015005	0.118792	1:161708194_T_G	Baso	rs10799941
African	1	162061209	C	T	0.673375	0.016104	0.014035	0.251161	1:162061209_C_T	Baso	rs16851902
African	1	162177803	G	A	0.310257	0.000163	0.014779	0.991217	1:162177803_G_A	Baso	rs4656359
African	1	162322803	G	A	0.749435	0.001334	0.015808	0.932711	1:162322803_G_A	Baso	rs1848843
African	1	162335256	C	T	0.577328	-0.025608	0.013345	0.055019	1:162335256_C_T	Baso	rs348624
African	1	162367874	G	T	0.972741	0.073423	0.041433	0.076391	1:162367874_G_T	Baso	rs61809468
African	1	162446878	G	A	0.711181	-0.023113	0.015327	0.131552	1:162446878_G_A	Baso	rs469951
African	1	162606728	T	C	0.739484	-0.016854	0.015106	0.264533	1:162606728_T_C	Baso	rs4656375
African	1	162650763	G	A	0.698724	0.010479	0.01435	0.46526	1:162650763_G_A	Baso	rs72709727
African	1	162827240	T	G	0.785909	0.012102	0.016189	0.454744	1:162827240_T_G	Baso	rs11585029
African	1	162852760	C	T	0.504989	0.010256	0.01315	0.435426	1:162852760_C_T	Baso	rs4657233
African	1	162929447	G	T	0.144621	-0.018424	0.024992	0.461016	1:162929447_G_T	Baso	rs10732281
African	1	162970868	A	T	0.91316	-0.000166	0.025713	0.994841	1:162970868_A_T	Baso	rs112616660
African	1	163072899	G	A	0.900542	-0.01754	0.021906	0.423319	1:163072899_G_A	Baso	rs2661299
African	1	163123382	G	A	0.865601	-0.021057	0.019321	0.275752	1:163123382_G_A	Baso	rs6664123
African	1	163216705	A	G	0.895406	0.020451	0.022915	0.372133	1:163216705_A_G	Baso	rs2814369
African	1	163217392	G	A	0.974452	-0.024449	0.045252	0.589016	1:163217392_G_A	Baso	rs114466359
African	1	163241577	G	A	0.92526	-0.015607	0.0251	0.534104	1:163241577_G_A	Baso	rs61812168
African	1	163345829	C	T	0.897663	-0.028283	0.023931	0.237237	1:163345829_C_T	Baso	rs10917739
African	1	163513839	G	A	0.877215	0.037459	0.023781	0.11521	1:163513839_G_A	Baso	rs12067389
African	1	163579955	T	C	0.935435	-0.029693	0.029424	0.312885	1:163579955_T_C	Baso	rs2791149
African	1	163590197	T	C	0.838225	-0.017038	0.018302	0.351878	1:163590197_T_C	Baso	rs7541708
African	1	163855599	C	T	0.558432	-0.003584	0.013344	0.788257	1:163855599_C_T	Baso	rs7520589
African	1	164068531	C	T	0.860114	-0.003203	0.019196	0.867465	1:164068531_C_T	Baso	rs12139028
African	1	164392501	A	G	0.540666	0.010629	0.013033	0.414767	1:164392501_A_G	Baso	rs2821398
African	1	164492154	C	T	0.927119	0.022177	0.025532	0.385057	1:164492154_C_T	Baso	rs12402920
African	1	164540861	A	G	0.467837	-0.013707	0.014369	0.340106	1:164540861_A_G	Baso	rs200773115
African	1	164609305	T	C	0.401681	-0.018605	0.014543	0.200753	1:164609305_T_C	Baso	rs1780349
African	1	164735436	G	T	0.422013	-0.009209	0.013761	0.503357	1:164735436_G_T	Baso	rs1780360
African	1	164764500	G	A	0.844158	-0.031928	0.018287	0.080819	1:164764500_G_A	Baso	rs4657375
African	1	164934507	T	G	0.413344	-0.002092	0.013766	0.879181	1:164934507_T_G	Baso	rs1361843
African	1	165117049	T	C	0.164542	0.020654	0.021743	0.342151	1:165117049_T_C	Baso	rs4657405
African	1	165189595	G	A	0.97334	0.034833	0.042423	0.411598	1:165189595_G_A	Baso	rs61800524
African	1	165196183	T	C	0.343419	-0.011749	0.014531	0.418762	1:165196183_T_C	Baso	rs2221418
African	1	165393753	G	T	0.743553	-0.021759	0.015092	0.149349	1:165393753_G_T	Baso	rs3753896
African	1	165562982	C	T	0.755334	-0.005506	0.015204	0.71726	1:165562982_C_T	Baso	rs1538116
African	1	165605310	A	G	0.222234	-0.004335	0.01728	0.801927	1:165605310_A_G	Baso	rs10800120
African	1	165743761	G	C	0.778946	-0.009221	0.016258	0.570624	1:165743761_G_C	Baso	rs61800457
African	1	166640635	T	C	0.598952	0.001763	0.013274	0.894303	1:166640635_T_C	Baso	rs472293
African	1	166976836	A	G	0.425109	-0.002812	0.013476	0.834711	1:166976836_A_G	Baso	rs66805418
African	1	167164887	A	G	0.433112	-0.002017	0.014082	0.886062	1:167164887_A_G	Baso	rs3931265
African	1	167420425	T	G	0.887487	0.002634	0.02066	0.898536	1:167420425_T_G	Baso	rs2056626
African	1	167667620	C	T	0.425864	-0.005877	0.013776	0.669684	1:167667620_C_T	Baso	rs13374598
African	1	168355541	C	G	0.230708	0.01285	0.018013	0.475615	1:168355541_C_G	Baso	rs909638
African	1	172332009	A	G	0.68276	-0.005956	0.01443	0.679801	1:172332009_A_G	Baso	rs979935
African	1	173163568	A	G	0.229992	-0.008844	0.017115	0.605338	1:173163568_A_G	Baso	rs7518129
African	1	174242805	G	A	0.308892	0.032677	0.014818	0.027457	1:174242805_G_A	Baso	rs10912754
African	1	178097515	G	A	0.72014	-0.021261	0.014975	0.155641	1:178097515_G_A	Baso	rs451341
African	1	43771880	G	A	0.965757	-0.00032	0.037296	0.993153	1:43771880_G_A	Baso	rs74069551
African	1	94980123	G	A	0.949757	-0.022717	0.031065	0.464622	1:94980123_G_A	Baso	rs72729511
African	2	135777869	G	A	0.974498	-0.065517	0.04238	0.122108	2:135777869_G_A	Baso	rs140516485
African	2	182308352	A	G	0.380933	-0.029471	0.013686	0.031315	2:182308352_A_G	Baso	rs6740847
African	2	182318491	G	A	0.859249	0.054984	0.018918	0.003668	2:182318491_G_A	Baso	rs72894360
African	2	46308680	A	G	0.240818	-0.048519	0.01731	0.005079	2:46308680_A_G	Baso	rs11690784
African	3	128330526	T	C	0.387213	-0.001422	0.013386	0.915395	3:128330526_T_C	Baso	rs67445542
African	3	183857545	C	G	0.920312	-0.007496	0.0251	0.765199	3:183857545_C_G	Baso	rs141985150
African	3	184094724	T	C	0.801105	0.003569	0.016435	0.828092	3:184094724_T_C	Baso	rs13084750
African	3	56849749	T	C	0.75833	-0.002932	0.015481	0.849789	3:56849749_T_C	Baso	rs1354034
African	5	95162889	G	A	0.946909	0.034123	0.029291	0.244016	5:95162889_G_A	Baso	rs4869251
African	6	135419018	T	C	0.948574	-0.018942	0.030177	0.530225	6:135419018_T_C	Baso	rs9399137
African	6	139831180	G	A	0.552685	0.005176	0.01303	0.691216	6:139831180_G_A	Baso	rs679582
African	6	143558736	T	A	0.962489	0.059061	0.03532	0.094493	6:143558736_T_A	Baso	rs73594114
African	6	33482146	C	G	0.420126	0.011239	0.013489	0.404751	6:33482146_C_G	Baso	rs210194
African	7	106366781	G	A	0.504869	0.010909	0.013062	0.403614	7:106366781_G_A	Baso	rs10278865
African	7	28711319	G	A	0.860212	-0.014471	0.020818	0.487008	7:28711319_G_A	Baso	rs73304938
African	7	80219147	G	C	0.798037	-0.051994	0.016279	0.00141	7:80219147_G_C	Baso	rs79957681
African	7	92387918	T	C	0.835875	0.045378	0.017681	0.010292	7:92387918_T_C	Baso	rs6970319
African	8	130602281	A	C	0.500468	-0.013729	0.013314	0.302434	8:130602281_A_C	Baso	rs10103048
African	8	86154040	A	G	0.900956	-0.007965	0.021932	0.716495	8:86154040_A_G	Baso	rs75562449
African	9	91505937	G	A	0.841434	0.019616	0.0183	0.283729	9:91505937_G_A	Baso	rs12345705
African	10	64862314	T	G	0.552405	0.007638	0.012511	0.54155	10:64862314_T_G	Neutro	rs4363488
African	11	3953878	C	T	0.975196	-0.075197	0.039132	0.054666	11:3953878_C_T	Neutro	rs112706563
African	11	4947734	T	G	0.976911	-0.074593	0.040864	0.067951	11:4947734_T_G	Neutro	rs59618482
African	11	5214857	A	G	0.44866	-0.021023	0.01255	0.093908	11:5214857_A_G	Neutro	rs7482866
African	11	5259768	A	G	0.733617	0.000656	0.01415	0.963016	11:5259768_A_G	Neutro	rs10488681
African	11	5306996	C	T	0.962541	-0.069843	0.033247	0.035684	11:5306996_C_T	Neutro	rs112915912
African	11	63698035	T	A	0.350345	-0.019055	0.013005	0.142848	11:63698035_T_A	Neutro	rs11231642
African	12	111843000	T	C	0.874069	-0.03038	0.018123	0.093678	12:111843000_T_C	Neutro	rs114985662
African	13	113969390	T	C	0.539774	0.009047	0.012809	0.479996	13:113969390_T_C	Neutro	rs7326696
African	14	64692465	T	C	0.492929	-0.007045	0.012454	0.571599	14:64692465_T_C	Neutro	rs1048315
African	16	108585	T	C	0.126186	-0.032565	0.027873	0.242643	16:108585_T_C	Neutro	rs216598
African	16	130429	G	C	0.96102	-0.025955	0.031508	0.410068	16:130429_G_C	Neutro	rs3176399
African	16	136142	C	T	0.13582	-0.019326	0.023928	0.41927	16:136142_C_T	Neutro	rs2541623
African	16	143503	C	T	0.871642	0.027117	0.020334	0.182319	16:143503_C_T	Neutro	rs6600233
African	16	174926	A	C	0.888407	0.003806	0.019103	0.842064	16:174926_A_C	Neutro	rs34291820
African	16	2028402	A	C	0.415539	-0.012257	0.013154	0.351434	16:2028402_A_C	Neutro	rs8460
African	16	207373	A	T	0.958501	-0.013081	0.030845	0.67153	16:207373_A_T	Neutro	rs538965378
African	16	225185	A	G	0.986335	0.036992	0.061009	0.54431	16:225185_A_G	Neutro	rs555255920
African	16	3004161	T	A	0.180403	-0.010577	0.020226	0.601059	16:3004161_T_A	Neutro	rs4785921
African	16	304514	C	T	0.866711	-0.003453	0.018138	0.849003	16:304514_C_T	Neutro	rs3213508
African	16	319822	G	C	0.984772	0.022519	0.054115	0.677337	16:319822_G_C	Neutro	rs112877257
African	16	321754	T	G	0.967931	0.024772	0.038871	0.523968	16:321754_T_G	Neutro	rs183388202
African	16	324479	C	G	0.785955	-0.009122	0.017765	0.607625	16:324479_C_G	Neutro	rs3752435
African	16	326773	A	G	0.767644	-0.020069	0.017775	0.258854	16:326773_A_G	Neutro	rs73486221
African	16	336071	A	T	0.97819	-0.112857	0.074943	0.132082	16:336071_A_T	Neutro	rs546817919
African	16	360148	C	T	0.869413	-0.035957	0.018019	0.046006	16:360148_C_T	Neutro	rs55931984
African	16	408299	C	T	0.963557	-0.037181	0.033337	0.264702	16:408299_C_T	Neutro	rs77621702
African	16	418154	G	C	0.969471	-0.042101	0.040133	0.29415	16:418154_G_C	Neutro	rs150051846
African	16	4473077	T	C	0.801413	-0.003119	0.016858	0.853192	16:4473077_T_C	Neutro	rs3948237
African	16	449659	G	A	0.448535	0.010043	0.01279	0.432333	16:449659_G_A	Neutro	rs14293
African	16	450759	C	G	0.271421	0.010386	0.0156	0.505577	16:450759_C_G	Neutro	rs407983
African	16	617757	A	G	0.971212	0.013038	0.039125	0.738969	16:617757_A_G	Neutro	rs115165076
African	16	66679	T	C	0.723687	0.000702	0.02701	0.979263	16:66679_T_C	Neutro	rs575317242
African	16	68704	C	T	0.966081	-0.10686	0.064111	0.095558	16:68704_C_T	Neutro	rs537557137
African	16	771108	C	A	0.653967	0.025969	0.013674	0.05755	16:771108_C_A	Neutro	rs56085648
African	16	796508	G	T	0.889815	-0.040665	0.025376	0.109037	16:796508_G_T	Neutro	rs182560663
African	16	817561	G	A	0.334242	0.00445	0.017194	0.795798	16:817561_G_A	Neutro	rs536284860
African	16	82334	G	A	0.986624	0.01448	0.05932	0.807148	16:82334_G_A	Neutro	rs35391410
African	16	83562	C	T	0.922533	-0.021522	0.026525	0.417154	16:83562_C_T	Neutro	rs2541685
African	16	85065	G	A	0.818112	-0.018175	0.018454	0.324674	16:85065_G_A	Neutro	rs3930588
African	16	858094	A	G	0.462886	0.002886	0.013049	0.824969	16:858094_A_G	Neutro	rs72759417
African	16	85932730	C	A	0.939078	0.005513	0.025349	0.827832	16:85932730_C_A	Neutro	rs12325654
African	16	99565	G	A	0.985245	0.014601	0.051535	0.776925	16:99565_G_A	Neutro	rs150800825
African	17	38028634	G	T	0.614339	0.016411	0.012492	0.188894	17:38028634_G_T	Neutro	rs11557467
African	19	16185559	G	A	0.90511	0.017049	0.021389	0.425419	19:16185559_G_A	Neutro	rs8109288
African	19	6802571	C	T	0.916859	-0.023322	0.022462	0.299117	19:6802571_C_T	Neutro	rs8106212
African	1	100846956	T	C	0.151794	0.13274	0.023649	2.04e-08	1:100846956_T_C	Neutro	rs565590
African	1	102502084	T	C	0.936149	-0.161604	0.029408	3.99e-08	1:102502084_T_C	Neutro	rs12046299
African	1	103025218	T	C	0.444763	-0.070913	0.012382	1.05e-08	1:103025218_T_C	Neutro	rs1589096
African	1	106081299	A	G	0.487326	-0.068997	0.012623	4.71e-08	1:106081299_A_G	Neutro	rs1710774
African	1	107535806	T	A	0.730117	-0.081194	0.01433	1.5e-08	1:107535806_T_A	Neutro	rs9435338
African	1	109827253	A	G	0.468371	-0.073424	0.012742	8.5e-09	1:109827253_A_G	Neutro	rs672569
African	1	110231777	G	A	0.921608	-0.219898	0.037682	5.5e-09	1:110231777_G_A	Neutro	rs4147565
African	1	111100498	G	A	0.828009	-0.110271	0.018197	1.4e-09	1:111100498_G_A	Neutro	rs11102131
African	1	111163693	C	T	0.747815	-0.089194	0.014909	2.26e-09	1:111163693_C_T	Neutro	rs12132073
African	1	111748488	A	G	0.889612	-0.126311	0.022293	1.5e-08	1:111748488_A_G	Neutro	rs2783440
African	1	112320846	T	G	0.409734	0.059227	0.012906	4.52e-06	1:112320846_T_G	Neutro	rs535183
African	1	112612098	G	A	0.630385	0.071995	0.012796	1.89e-08	1:112612098_G_A	Neutro	rs269127
African	1	112767483	T	C	0.509972	0.07681	0.013135	5.12e-09	1:112767483_T_C	Neutro	rs56693678
African	1	112824160	C	T	0.908633	-0.13085	0.023109	1.53e-08	1:112824160_C_T	Neutro	rs4073809
African	1	112941134	G	A	0.555984	0.071779	0.012671	1.51e-08	1:112941134_G_A	Neutro	rs2492508
African	1	113022434	A	G	0.520423	0.070198	0.012436	1.7e-08	1:113022434_A_G	Neutro	rs10857956
African	1	113085721	A	C	0.192649	0.118874	0.01891	3.36e-10	1:113085721_A_C	Neutro	rs4838959
African	1	113344299	G	A	0.479572	-0.074102	0.012922	1e-08	1:113344299_G_A	Neutro	rs10745336
African	1	113874773	T	G	0.955173	-0.180406	0.032846	4.06e-08	1:113874773_T_G	Neutro	rs1935746
African	1	114078037	A	G	0.641814	-0.09082	0.013414	1.33e-11	1:114078037_A_G	Neutro	rs12026423
African	1	114671733	C	A	0.907401	0.081958	0.021266	0.000117	1:114671733_C_A	Neutro	rs79356431
African	1	114681932	T	C	0.092427	0.279667	0.04181	2.33e-11	1:114681932_T_C	Neutro	rs2629808
African	1	115618547	T	C	0.943077	-0.162514	0.029279	2.92e-08	1:115618547_T_C	Neutro	rs4839022
African	1	115734289	G	A	0.756455	-0.086902	0.014937	6.12e-09	1:115734289_G_A	Neutro	rs195203
African	1	116083584	C	T	0.686241	0.077234	0.013173	4.67e-09	1:116083584_C_T	Neutro	rs6672158
African	1	116416579	C	T	0.928499	-0.151624	0.02685	1.67e-08	1:116416579_C_T	Neutro	rs10923690
African	1	116724459	A	G	0.527216	0.0811	0.01231	4.6e-11	1:116724459_A_G	Neutro	rs911221
African	1	116886547	G	T	0.517997	0.081805	0.012572	7.94e-11	1:116886547_G_T	Neutro	rs6701849
African	1	116923792	A	G	0.416209	0.115245	0.012898	4.32e-19	1:116923792_A_G	Neutro	rs6428896
African	1	117554421	A	G	0.917536	-0.171544	0.024338	1.88e-12	1:117554421_A_G	Neutro	rs3754112
African	1	117728652	A	G	0.715485	-0.075754	0.014191	9.59e-08	1:117728652_A_G	Neutro	rs10047089
African	1	117771515	C	T	0.436714	-0.076951	0.012562	9.29e-10	1:117771515_C_T	Neutro	rs10754343
African	1	117793269	T	A	0.400917	0.080908	0.013542	2.37e-09	1:117793269_T_A	Neutro	rs6428700
African	1	118126591	C	T	0.27681	0.079189	0.015582	3.8e-07	1:118126591_C_T	Neutro	rs861152
African	1	118282130	A	C	0.850906	-0.09949	0.017904	2.81e-08	1:118282130_A_C	Neutro	rs12137791
African	1	119054510	T	A	0.85688	-0.107811	0.018916	1.23e-08	1:119054510_T_A	Neutro	rs7519196
African	1	119992162	C	G	0.830083	-0.09251	0.017929	2.52e-07	1:119992162_C_G	Neutro	rs12039340
African	1	120021503	T	G	0.506231	0.067966	0.01242	4.54e-08	1:120021503_T_G	Neutro	rs74525369
African	1	121153366	G	C	0.830097	-0.126748	0.020995	1.62e-09	1:121153366_G_C	Neutro	rs2003134
African	1	121429112	C	G	0.346257	-0.11588	0.019387	2.34e-09	1:121429112_C_G	Neutro	rs200129125
African	1	143396820	T	C	0.076387	0.267432	0.048168	2.89e-08	1:143396820_T_C	Neutro	rs3105533
African	1	143734242	C	T	0.884466	-0.206097	0.037089	2.81e-08	1:143734242_C_T	Neutro	rs12132106
African	1	145554450	T	C	0.927685	-0.177708	0.027024	5e-11	1:145554450_T_C	Neutro	rs12125340
African	1	145560476	G	A	0.341249	0.091828	0.013867	3.67e-11	1:145560476_G_A	Neutro	rs10797650
African	1	146589758	C	T	0.417702	0.08578	0.012781	1.99e-11	1:146589758_C_T	Neutro	rs750467
African	1	146817245	A	T	0.486044	-0.070414	0.01215	6.99e-09	1:146817245_A_T	Neutro	rs6693667
African	1	147003202	G	T	0.934457	-0.156343	0.027961	2.31e-08	1:147003202_G_T	Neutro	rs112530376
African	1	147013836	A	C	0.338536	0.090802	0.013772	4.45e-11	1:147013836_A_C	Neutro	rs594132
African	1	147056280	C	A	0.612145	-0.113327	0.013278	1.48e-17	1:147056280_C_A	Neutro	rs628928
African	1	147220045	C	A	0.94796	-0.1909	0.03022	2.75e-10	1:147220045_C_A	Neutro	rs12032789
African	1	147381558	G	A	0.489884	-0.100922	0.01419	1.19e-12	1:147381558_G_A	Neutro	rs2132397
African	1	147797417	G	A	0.503746	-0.076317	0.013158	6.81e-09	1:147797417_G_A	Neutro	rs2105069
African	1	149868334	C	T	0.522324	0.089988	0.01307	5.99e-12	1:149868334_C_T	Neutro	rs12062387
African	1	149892872	A	G	0.876202	-0.158823	0.020977	3.86e-14	1:149892872_A_G	Neutro	rs11205277
African	1	150047928	T	C	0.384206	-0.093063	0.012972	7.59e-13	1:150047928_T_C	Neutro	rs10888571
African	1	150202423	A	G	0.684457	0.075996	0.013248	9.91e-09	1:150202423_A_G	Neutro	rs11205344
African	1	150244046	G	A	0.714791	0.08095	0.013616	2.84e-09	1:150244046_G_A	Neutro	rs73011380
African	1	150672262	T	C	0.385732	-0.066333	0.012698	1.79e-07	1:150672262_T_C	Neutro	rs1932864
African	1	151118035	C	G	0.381326	0.09206	0.013259	3.98e-12	1:151118035_C_G	Neutro	rs11204782
African	1	151343545	T	C	0.859509	-0.103016	0.018327	1.95e-08	1:151343545_T_C	Neutro	rs61818027
African	1	151445752	C	T	0.570016	-0.07907	0.013048	1.4e-09	1:151445752_C_T	Neutro	rs10888415
African	1	151692483	A	G	0.800309	-0.103679	0.016033	1.04e-10	1:151692483_A_G	Neutro	rs6683687
African	1	151737129	A	G	0.761628	0.076277	0.014177	7.6e-08	1:151737129_A_G	Neutro	rs61186168
African	1	152007599	T	C	0.731058	0.085964	0.013392	1.42e-10	1:152007599_T_C	Neutro	rs3007676
African	1	152161103	T	G	0.377359	-0.088281	0.012707	3.87e-12	1:152161103_T_G	Neutro	rs1390489
African	1	152391282	C	A	0.575053	-0.075053	0.012272	9.9e-10	1:152391282_C_A	Neutro	rs4845766
African	1	152552285	C	A	0.821661	-0.095949	0.016046	2.3e-09	1:152552285_C_A	Neutro	rs512208
African	1	152558146	G	A	0.883929	0.110822	0.020212	4.28e-08	1:152558146_G_A	Neutro	rs76340524
African	1	152779534	A	T	0.8484	-0.10284	0.01799	1.12e-08	1:152779534_A_T	Neutro	rs28649970
African	1	152887237	T	C	0.541602	0.077619	0.012384	3.78e-10	1:152887237_T_C	Neutro	rs6587711
African	1	152946894	A	G	0.78881	0.089141	0.014829	1.9e-09	1:152946894_A_G	Neutro	rs10159262
African	1	153065287	A	C	0.47018	0.077512	0.01271	1.1e-09	1:153065287_A_C	Neutro	rs3843257
African	1	153143504	C	G	0.551289	0.081733	0.012666	1.13e-10	1:153143504_C_G	Neutro	rs498131
African	1	153200987	C	T	0.866328	-0.098594	0.018862	1.76e-07	1:153200987_C_T	Neutro	rs12081567
African	1	153334077	C	A	0.802866	0.095408	0.016354	5.57e-09	1:153334077_C_A	Neutro	rs3014869
African	1	153337943	G	A	0.899102	-0.121533	0.021561	1.78e-08	1:153337943_G_A	Neutro	rs3014874
African	1	153390542	G	C	0.612399	0.080489	0.013238	1.24e-09	1:153390542_G_C	Neutro	rs3006412
African	1	153459023	C	T	0.562784	-0.083331	0.013053	1.78e-10	1:153459023_C_T	Neutro	rs7535089
African	1	153530231	T	A	0.660399	0.093933	0.013294	1.66e-12	1:153530231_T_A	Neutro	rs28689606
African	1	153630726	T	C	0.690437	0.079834	0.013346	2.27e-09	1:153630726_T_C	Neutro	rs58379041
African	1	154044453	T	C	0.958996	-0.260132	0.041571	4.03e-10	1:154044453_T_C	Neutro	rs113462784
African	1	154206358	T	C	0.976336	-0.275816	0.044411	5.45e-10	1:154206358_T_C	Neutro	rs12027999
African	1	154292348	G	A	0.245869	0.113011	0.015784	8.4e-13	1:154292348_G_A	Neutro	rs1685606
African	1	154342517	C	T	0.944464	-0.181624	0.031249	6.34e-09	1:154342517_C_T	Neutro	rs79438587
African	1	154407419	A	C	0.77661	-0.098167	0.015021	6.57e-11	1:154407419_A_C	Neutro	rs7518199
African	1	154440604	T	C	0.84113	0.095858	0.016884	1.4e-08	1:154440604_T_C	Neutro	rs41308415
African	1	154665606	T	C	0.965308	-0.252606	0.040452	4.38e-10	1:154665606_T_C	Neutro	rs57541561
African	1	154726546	G	C	0.837295	-0.141483	0.017828	2.19e-15	1:154726546_G_C	Neutro	rs10494300
African	1	154731622	C	T	0.903163	-0.117946	0.022192	1.09e-07	1:154731622_C_T	Neutro	rs12038684
African	1	154763613	G	T	0.914958	-0.159731	0.023436	9.73e-12	1:154763613_G_T	Neutro	rs113920303
African	1	154788815	C	T	0.767932	0.112966	0.014703	1.63e-14	1:154788815_C_T	Neutro	rs59517499
African	1	154822907	C	T	0.730215	-0.097829	0.014259	7.09e-12	1:154822907_C_T	Neutro	rs906595
African	1	155008610	A	G	0.27208	0.096086	0.014879	1.1e-10	1:155008610_A_G	Neutro	rs4845406
African	1	155129499	A	G	0.695649	0.092828	0.013307	3.16e-12	1:155129499_A_G	Neutro	rs150587259
African	1	155682870	C	T	0.312712	0.097882	0.014119	4.29e-12	1:155682870_C_T	Neutro	rs490608
African	1	156085375	T	C	0.523416	-0.119551	0.012465	9.33e-22	1:156085375_T_C	Neutro	rs547915
African	1	156184659	T	G	0.787995	0.085466	0.014825	8.39e-09	1:156184659_T_G	Neutro	rs7530415
African	1	156247481	C	T	0.870782	-0.104393	0.018613	2.09e-08	1:156247481_C_T	Neutro	rs10908493
African	1	156361116	G	A	0.857824	0.110005	0.017596	4.18e-10	1:156361116_G_A	Neutro	rs73010652
African	1	156407051	T	C	0.478962	0.08961	0.01281	2.75e-12	1:156407051_T_C	Neutro	rs6665039
African	1	156484318	C	G	0.304917	0.102882	0.013946	1.69e-13	1:156484318_C_G	Neutro	rs6427312
African	1	156613517	C	A	0.273257	-0.102331	0.015119	1.35e-11	1:156613517_C_A	Neutro	rs4233511
African	1	156619135	A	T	0.261593	0.159713	0.015949	1.42e-23	1:156619135_A_T	Neutro	rs4233512
African	1	156687576	C	T	0.259641	-0.085517	0.015777	6.09e-08	1:156687576_C_T	Neutro	rs4661214
African	1	156819216	T	C	0.859683	0.121535	0.01811	2e-11	1:156819216_T_C	Neutro	rs74118779
African	1	156833913	A	G	0.757537	0.117297	0.015059	7.06e-15	1:156833913_A_G	Neutro	rs74118782
African	1	156838974	C	T	0.788976	0.08611	0.01546	2.61e-08	1:156838974_C_T	Neutro	rs61813772
African	1	157016710	C	T	0.936759	-0.234278	0.026147	3.44e-19	1:157016710_C_T	Neutro	rs11264606
African	1	157069154	A	G	0.504254	0.11707	0.012484	7.18e-21	1:157069154_A_G	Neutro	rs16838075
African	1	157126453	C	G	0.927053	-0.220657	0.026074	2.75e-17	1:157126453_C_G	Neutro	rs61799686
African	1	157140430	C	A	0.823379	0.09277	0.016055	7.75e-09	1:157140430_C_A	Neutro	rs6657979
African	1	157154912	C	G	0.751279	0.113609	0.01511	5.78e-14	1:157154912_C_G	Neutro	rs74119210
African	1	157275048	C	T	0.957963	-0.259552	0.034573	6.3e-14	1:157275048_C_T	Neutro	rs12047109
African	1	157321422	C	T	0.347743	0.091051	0.013756	3.74e-11	1:157321422_C_T	Neutro	rs9427263
African	1	157341048	A	G	0.808145	0.105504	0.015698	1.87e-11	1:157341048_A_G	Neutro	rs12080330
African	1	157435230	G	A	0.497881	-0.065643	0.012475	1.46e-07	1:157435230_G_A	Neutro	rs4111874
African	1	157479006	G	A	0.970799	-0.41224	0.049926	1.57e-16	1:157479006_G_A	Neutro	rs4110937
African	1	157485275	T	G	0.585632	0.125095	0.012247	1.83e-24	1:157485275_T_G	Neutro	rs3811036
African	1	157541674	A	C	0.309127	0.17283	0.01415	2.86e-34	1:157541674_A_C	Neutro	rs849819
African	1	157820033	T	C	0.894933	0.112893	0.019691	1.01e-08	1:157820033_T_C	Neutro	rs16839297
African	1	157979035	A	G	0.699877	0.077509	0.013396	7.41e-09	1:157979035_A_G	Neutro	rs6680700
African	1	157991269	G	C	0.693715	0.08694	0.013176	4.3e-11	1:157991269_G_C	Neutro	rs11264874
African	1	158024742	A	G	0.199808	-0.082236	0.017147	1.65e-06	1:158024742_A_G	Neutro	rs7523161
African	1	158032447	T	G	0.188881	0.147697	0.01881	4.29e-15	1:158032447_T_G	Neutro	rs6677623
African	1	158053170	A	G	0.581718	0.086603	0.012235	1.52e-12	1:158053170_A_G	Neutro	rs73024667
African	1	158084162	T	C	0.816658	0.078613	0.016073	1.02e-06	1:158084162_T_C	Neutro	rs57035221
African	1	158108284	T	A	0.602704	0.076707	0.012779	2e-09	1:158108284_T_A	Neutro	rs10908624
African	1	158265973	T	C	0.782935	0.091352	0.015006	1.18e-09	1:158265973_T_C	Neutro	rs73023953
African	1	158365697	C	T	0.732165	0.10065	0.014384	2.71e-12	1:158365697_C_T	Neutro	rs12405213
African	1	158398965	C	T	0.9733	-0.27124	0.042418	1.66e-10	1:158398965_C_T	Neutro	rs144581779
African	1	158542883	G	A	0.828268	0.097228	0.016192	1.97e-09	1:158542883_G_A	Neutro	rs55755372
African	1	158618455	G	A	0.869039	-0.13364	0.019387	5.66e-12	1:158618455_G_A	Neutro	rs2246434
African	1	158644851	A	G	0.153231	-0.128009	0.020327	3.12e-10	1:158644851_A_G	Neutro	rs703117
African	1	158679507	A	T	0.896549	0.11424	0.019569	5.44e-09	1:158679507_A_T	Neutro	rs434260
African	1	158701660	A	C	0.946987	-0.156386	0.02789	2.11e-08	1:158701660_A_C	Neutro	rs77800865
African	1	158785094	C	T	0.662944	-0.071226	0.012844	3e-08	1:158785094_C_T	Neutro	rs857786
African	1	158833656	G	T	0.123678	0.332923	0.029344	8.44e-30	1:158833656_G_T	Neutro	rs2820126
African	1	158903759	T	G	0.347245	-0.216005	0.016837	1.23e-37	1:158903759_T_G	Neutro	rs1772397
African	1	158907751	A	C	0.960266	-0.225203	0.036145	4.79e-10	1:158907751_A_C	Neutro	rs113812917
African	1	158912448	G	A	0.181483	-0.132891	0.018611	9.68e-13	1:158912448_G_A	Neutro	rs856081
African	1	158950333	T	C	0.267515	-0.13039	0.014193	4.3e-20	1:158950333_T_C	Neutro	rs856138
African	1	158980645	G	A	0.212812	-0.116483	0.016145	5.63e-13	1:158980645_G_A	Neutro	rs864439
African	1	159162922	G	A	0.708445	0.136245	0.013605	1.41e-23	1:159162922_G_A	Neutro	rs2852717
African	1	159252040	G	T	0.933026	0.118401	0.023926	7.61e-07	1:159252040_G_T	Neutro	rs16841975
African	1	159511202	C	T	0.451392	-0.163429	0.012512	6.01e-39	1:159511202_C_T	Neutro	rs4465205
African	1	159608533	T	C	0.812806	0.109669	0.015487	1.49e-12	1:159608533_T_C	Neutro	rs74122971
African	1	159737983	C	T	0.864721	0.12759	0.018777	1.12e-11	1:159737983_C_T	Neutro	rs10159314
African	1	159768918	C	T	0.948968	-0.164064	0.029804	3.78e-08	1:159768918_C_T	Neutro	rs72700611
African	1	159782360	G	A	0.873989	0.10254	0.01875	4.63e-08	1:159782360_G_A	Neutro	rs77142732
African	1	159800098	A	G	0.783998	0.09463	0.015337	7.03e-10	1:159800098_A_G	Neutro	rs41317533
African	1	159815940	G	T	0.134374	0.163103	0.025374	1.34e-10	1:159815940_G_T	Neutro	rs2501353
African	1	159818817	T	C	0.877405	0.138422	0.020401	1.2e-11	1:159818817_T_C	Neutro	rs2501345
African	1	159884207	G	C	0.762283	0.114676	0.014913	1.55e-14	1:159884207_G_C	Neutro	rs12067321
African	1	159927907	T	C	0.744867	0.091374	0.014252	1.49e-10	1:159927907_T_C	Neutro	rs12144158
African	1	160009121	A	C	0.409624	0.076763	0.012927	2.97e-09	1:160009121_A_C	Neutro	rs1053074
African	1	160038698	G	A	0.879795	0.136726	0.019567	2.9e-12	1:160038698_G_A	Neutro	rs80298170
African	1	160125463	T	C	0.788568	0.113232	0.015453	2.44e-13	1:160125463_T_C	Neutro	rs16831449
African	1	160145688	C	G	0.221149	0.094104	0.016002	4.19e-09	1:160145688_C_G	Neutro	rs1884996
African	1	160158031	G	A	0.835009	0.092856	0.017363	9.09e-08	1:160158031_G_A	Neutro	rs76138322
African	1	160162872	A	G	0.849273	-0.188928	0.018082	1.61e-25	1:160162872_A_G	Neutro	rs617698
African	1	160206394	G	A	0.734575	-0.117065	0.013984	6.01e-17	1:160206394_G_A	Neutro	rs9633341
African	1	160489974	A	G	0.339826	-0.098435	0.01322	1.01e-13	1:160489974_A_G	Neutro	rs3845627
African	1	160651728	A	G	0.738459	0.130097	0.014732	1.1e-18	1:160651728_A_G	Neutro	rs16832311
African	1	160666350	A	G	0.337131	-0.078083	0.013544	8.37e-09	1:160666350_A_G	Neutro	rs504716
African	1	160729163	G	C	0.970282	-0.452725	0.041511	1.16e-27	1:160729163_G_C	Neutro	rs11265475
African	1	160736598	T	C	0.284749	-0.122549	0.01408	3.4e-18	1:160736598_T_C	Neutro	rs492484
African	1	160773029	G	A	0.894239	-0.145009	0.020639	2.21e-12	1:160773029_G_A	Neutro	rs1961611
African	1	161225699	G	C	0.876742	0.107727	0.019478	3.26e-08	1:161225699_G_C	Neutro	rs543799247
African	1	161475750	G	A	0.968953	-0.299195	0.040015	7.94e-14	1:161475750_G_A	Neutro	rs10494360
African	1	161481546	T	C	0.8296	0.097458	0.017366	2.05e-08	1:161481546_T_C	Neutro	rs114926793
African	1	161567067	T	A	0.542376	-0.075176	0.014025	8.49e-08	1:161567067_T_A	Neutro	rs61801824
African	1	161595730	C	A	0.704768	-0.092554	0.015542	2.67e-09	1:161595730_C_A	Neutro	rs143596860
African	1	161698125	C	T	0.897834	0.120022	0.019782	1.34e-09	1:161698125_C_T	Neutro	rs113563530
African	1	161708194	T	G	0.734219	0.086709	0.014007	6.19e-10	1:161708194_T_G	Neutro	rs10799941
African	1	162061209	C	T	0.690305	0.094482	0.013132	6.52e-13	1:162061209_C_T	Neutro	rs16851902
African	1	162177803	G	A	0.295135	-0.078124	0.013764	1.42e-08	1:162177803_G_A	Neutro	rs4656359
African	1	162322803	G	A	0.765978	0.090152	0.014778	1.09e-09	1:162322803_G_A	Neutro	rs1848843
African	1	162335256	C	T	0.592055	0.087672	0.012499	2.4e-12	1:162335256_C_T	Neutro	rs348624
African	1	162367874	G	T	0.966544	-0.297445	0.037208	1.37e-15	1:162367874_G_T	Neutro	rs61809468
African	1	162446878	G	A	0.729238	0.110224	0.014328	1.51e-14	1:162446878_G_A	Neutro	rs469951
African	1	162606728	T	C	0.717157	-0.121469	0.013999	4.3e-18	1:162606728_T_C	Neutro	rs4656375
African	1	162650763	G	A	0.709632	0.086681	0.013417	1.08e-10	1:162650763_G_A	Neutro	rs72709727
African	1	162827240	T	G	0.796998	0.102395	0.015151	1.45e-11	1:162827240_T_G	Neutro	rs11585029
African	1	162852760	C	T	0.48036	-0.087784	0.012279	9.1e-13	1:162852760_C_T	Neutro	rs4657233
African	1	162929447	G	T	0.153531	0.16325	0.022856	9.54e-13	1:162929447_G_T	Neutro	rs10732281
African	1	162970868	A	T	0.916256	0.143341	0.024157	3.05e-09	1:162970868_A_T	Neutro	rs112616660
African	1	163072899	G	A	0.885714	-0.135453	0.020083	1.59e-11	1:163072899_G_A	Neutro	rs2661299
African	1	163123382	G	A	0.856751	-0.09945	0.017797	2.35e-08	1:163123382_G_A	Neutro	rs6664123
African	1	163216705	A	G	0.902416	0.119082	0.021573	3.47e-08	1:163216705_A_G	Neutro	rs2814369
African	1	163217392	G	A	0.9656	-0.314926	0.039908	3.14e-15	1:163217392_G_A	Neutro	rs114466359
African	1	163241577	G	A	0.918405	-0.127687	0.023205	3.83e-08	1:163241577_G_A	Neutro	rs61812168
African	1	163345829	C	T	0.881965	-0.253236	0.02171	2.11e-31	1:163345829_C_T	Neutro	rs10917739
African	1	163513839	G	A	0.886042	0.123901	0.022041	1.94e-08	1:163513839_G_A	Neutro	rs12067389
African	1	163579955	T	C	0.9239	-0.173568	0.02613	3.19e-11	1:163579955_T_C	Neutro	rs2791149
African	1	163590197	T	C	0.823881	-0.114716	0.016913	1.22e-11	1:163590197_T_C	Neutro	rs7541708
African	1	163855599	C	T	0.577099	0.077395	0.012475	5.68e-10	1:163855599_C_T	Neutro	rs7520589
African	1	164068531	C	T	0.844207	-0.146586	0.017722	1.39e-16	1:164068531_C_T	Neutro	rs12139028
African	1	164392501	A	G	0.56192	0.080917	0.012146	2.8e-11	1:164392501_A_G	Neutro	rs2821398
African	1	164492154	C	T	0.915105	-0.130173	0.023508	3.14e-08	1:164492154_C_T	Neutro	rs12402920
African	1	164540861	A	G	0.491089	0.079499	0.013412	3.16e-09	1:164540861_A_G	Neutro	rs200773115
African	1	164609305	T	C	0.377656	-0.095749	0.013601	2e-12	1:164609305_T_C	Neutro	rs1780349
African	1	164735436	G	T	0.400453	-0.080247	0.012905	5.18e-10	1:164735436_G_T	Neutro	rs1780360
African	1	164764500	G	A	0.835826	-0.093446	0.016836	2.92e-08	1:164764500_G_A	Neutro	rs4657375
African	1	164934507	T	G	0.38948	-0.084587	0.012862	4.99e-11	1:164934507_T_G	Neutro	rs1361843
African	1	165117049	T	C	0.167232	0.118793	0.02	2.94e-09	1:165117049_T_C	Neutro	rs4657405
African	1	165189595	G	A	0.965623	-0.214267	0.0376	1.24e-08	1:165189595_G_A	Neutro	rs61800524
African	1	165196183	T	C	0.322777	-0.076666	0.01361	1.82e-08	1:165196183_T_C	Neutro	rs2221418
African	1	165393753	G	T	0.718461	-0.07649	0.013972	4.5e-08	1:165393753_G_T	Neutro	rs3753896
African	1	165562982	C	T	0.73788	-0.077341	0.014045	3.74e-08	1:165562982_C_T	Neutro	rs1538116
African	1	165605310	A	G	0.229351	0.083384	0.015981	1.85e-07	1:165605310_A_G	Neutro	rs10800120
African	1	165743761	G	C	0.757987	-0.108152	0.014966	5.16e-13	1:165743761_G_C	Neutro	rs61800457
African	1	166640635	T	C	0.615978	0.067873	0.01237	4.19e-08	1:166640635_T_C	Neutro	rs472293
African	1	166976836	A	G	0.441736	0.068803	0.012523	4.02e-08	1:166976836_A_G	Neutro	rs66805418
African	1	167164887	A	G	0.412499	-0.079729	0.013239	1.77e-09	1:167164887_A_G	Neutro	rs3931265
African	1	167420425	T	G	0.867922	-0.11814	0.018989	5.08e-10	1:167420425_T_G	Neutro	rs2056626
African	1	167667620	C	T	0.454755	0.082359	0.012825	1.39e-10	1:167667620_C_T	Neutro	rs13374598
African	1	168355541	C	G	0.259982	0.147207	0.016596	7.76e-19	1:168355541_C_G	Neutro	rs909638
African	1	172332009	A	G	0.650069	-0.073626	0.013491	4.94e-08	1:172332009_A_G	Neutro	rs979935
African	1	173163568	A	G	0.254474	0.093512	0.0159	4.18e-09	1:173163568_A_G	Neutro	rs7518129
African	1	174242805	G	A	0.333531	0.07215	0.013833	1.87e-07	1:174242805_G_A	Neutro	rs10912754
African	1	178097515	G	A	0.696038	-0.075951	0.013944	5.25e-08	1:178097515_G_A	Neutro	rs451341
African	1	43771880	G	A	0.968184	-0.063769	0.035328	0.071076	1:43771880_G_A	Neutro	rs74069551
African	1	94980123	G	A	0.931031	-0.151987	0.027829	4.83e-08	1:94980123_G_A	Neutro	rs72729511
African	2	135777869	G	A	0.976121	-0.218527	0.039911	4.47e-08	2:135777869_G_A	Neutro	rs140516485
African	2	182308352	A	G	0.385415	-0.018542	0.012687	0.143853	2:182308352_A_G	Neutro	rs6740847
African	2	182318491	G	A	0.851681	0.027521	0.017586	0.117593	2:182318491_G_A	Neutro	rs72894360
African	2	46308680	A	G	0.259877	0.005648	0.015995	0.72402	2:46308680_A_G	Neutro	rs11690784
African	3	128330526	T	C	0.384834	-0.023471	0.012504	0.06052	3:128330526_T_C	Neutro	rs67445542
African	3	183857545	C	G	0.924973	0.000569	0.023652	0.980806	3:183857545_C_G	Neutro	rs141985150
African	3	184094724	T	C	0.811552	-0.000781	0.015383	0.959513	3:184094724_T_C	Neutro	rs13084750
African	3	56849749	T	C	0.737317	-0.007197	0.014285	0.614422	3:56849749_T_C	Neutro	rs1354034
African	5	95162889	G	A	0.946055	0.019182	0.027298	0.482271	5:95162889_G_A	Neutro	rs4869251
African	6	135419018	T	C	0.940612	-0.017687	0.028339	0.532561	6:135419018_T_C	Neutro	rs9399137
African	6	139831180	G	A	0.539635	0.008708	0.012179	0.474626	6:139831180_G_A	Neutro	rs679582
African	6	143558736	T	A	0.964723	0.167749	0.033292	4.78e-07	6:143558736_T_A	Neutro	rs73594114
African	6	33482146	C	G	0.449152	-0.00813	0.0127	0.522101	6:33482146_C_G	Neutro	rs210194
African	7	106366781	G	A	0.506074	-0.018589	0.012148	0.125954	7:106366781_G_A	Neutro	rs10278865
African	7	28711319	G	A	0.869374	-0.107239	0.019413	3.39e-08	7:28711319_G_A	Neutro	rs73304938
African	7	80219147	G	C	0.806728	-0.058618	0.015267	0.000124	7:80219147_G_C	Neutro	rs79957681
African	7	92387918	T	C	0.846477	0.089991	0.016585	5.9e-08	7:92387918_T_C	Neutro	rs6970319
African	8	130602281	A	C	0.496471	0.030043	0.012381	0.015262	8:130602281_A_C	Neutro	rs10103048
African	8	86154040	A	G	0.909573	0.015506	0.020634	0.452398	8:86154040_A_G	Neutro	rs75562449
African	9	91505937	G	A	0.852127	0.007752	0.017267	0.653491	9:91505937_G_A	Neutro	rs12345705
African	10	64862314	T	G	0.548026	-0.066402	0.011894	2.42e-08	10:64862314_T_G	PLT	rs4363488
African	11	3953878	C	T	0.976459	0.052062	0.038336	0.174433	11:3953878_C_T	PLT	rs112706563
African	11	4947734	T	G	0.977229	0.045922	0.039148	0.24077	11:4947734_T_G	PLT	rs59618482
African	11	5214857	A	G	0.447941	-0.003033	0.012093	0.801987	11:5214857_A_G	PLT	rs7482866
African	11	5259768	A	G	0.736951	0.001298	0.013414	0.922899	11:5259768_A_G	PLT	rs10488681
African	11	5306996	C	T	0.963109	-0.05926	0.031839	0.062722	11:5306996_C_T	PLT	rs112915912
African	11	63698035	T	A	0.346114	-0.068752	0.012396	2.99e-08	11:63698035_T_A	PLT	rs11231642
African	12	111843000	T	C	0.875496	-0.094315	0.017274	4.87e-08	12:111843000_T_C	PLT	rs114985662
African	13	113969390	T	C	0.544849	0.067157	0.012136	3.21e-08	13:113969390_T_C	PLT	rs7326696
African	14	64692465	T	C	0.500619	0.01018	0.011809	0.388643	14:64692465_T_C	PLT	rs1048315
African	16	108585	T	C	0.119895	0.016787	0.026464	0.525878	16:108585_T_C	PLT	rs216598
African	16	130429	G	C	0.961185	0.029798	0.030618	0.330424	16:130429_G_C	PLT	rs3176399
African	16	136142	C	T	0.130154	-0.031466	0.022689	0.165477	16:136142_C_T	PLT	rs2541623
African	16	143503	C	T	0.866356	0.011931	0.019099	0.532183	16:143503_C_T	PLT	rs6600233
African	16	174926	A	C	0.890924	-0.01677	0.018413	0.362397	16:174926_A_C	PLT	rs34291820
African	16	2028402	A	C	0.417278	-0.019751	0.012529	0.114941	16:2028402_A_C	PLT	rs8460
African	16	207373	A	T	0.9589	0.027227	0.0303	0.368877	16:207373_A_T	PLT	rs538965378
African	16	225185	A	G	0.987055	0.047865	0.061546	0.43675	16:225185_A_G	PLT	rs555255920
African	16	3004161	T	A	0.181672	-0.023532	0.018899	0.213068	16:3004161_T_A	PLT	rs4785921
African	16	304514	C	T	0.864427	-0.000402	0.017243	0.981401	16:304514_C_T	PLT	rs3213508
African	16	319822	G	C	0.985292	-0.048302	0.053771	0.36903	16:319822_G_C	PLT	rs112877257
African	16	321754	T	G	0.968112	0.024844	0.037365	0.50613	16:321754_T_G	PLT	rs183388202
African	16	324479	C	G	0.786399	-0.012212	0.017065	0.474239	16:324479_C_G	PLT	rs3752435
African	16	326773	A	G	0.770607	0.004457	0.01741	0.797958	16:326773_A_G	PLT	rs73486221
African	16	336071	A	T	0.978324	-0.02824	0.074485	0.704607	16:336071_A_T	PLT	rs546817919
African	16	360148	C	T	0.871805	-0.024055	0.017294	0.164234	16:360148_C_T	PLT	rs55931984
African	16	408299	C	T	0.963547	-0.069957	0.03188	0.028231	16:408299_C_T	PLT	rs77621702
African	16	418154	G	C	0.969254	-0.015483	0.038653	0.688756	16:418154_G_C	PLT	rs150051846
African	16	4473077	T	C	0.789889	0.009169	0.015599	0.556717	16:4473077_T_C	PLT	rs3948237
African	16	449659	G	A	0.450391	0.009178	0.01223	0.453031	16:449659_G_A	PLT	rs14293
African	16	450759	C	G	0.273331	0.004479	0.014809	0.762334	16:450759_C_G	PLT	rs407983
African	16	617757	A	G	0.97106	0.00079	0.03737	0.983136	16:617757_A_G	PLT	rs115165076
African	16	66679	T	C	0.724039	0.028014	0.026843	0.296654	16:66679_T_C	PLT	rs575317242
African	16	68704	C	T	0.966316	0.023984	0.0641	0.708297	16:68704_C_T	PLT	rs537557137
African	16	771108	C	A	0.653646	0.017155	0.013032	0.188005	16:771108_C_A	PLT	rs56085648
African	16	796508	G	T	0.891005	0.01448	0.024972	0.562022	16:796508_G_T	PLT	rs182560663
African	16	817561	G	A	0.339837	-0.018243	0.016782	0.276991	16:817561_G_A	PLT	rs536284860
African	16	82334	G	A	0.986856	0.117359	0.058739	0.045735	16:82334_G_A	PLT	rs35391410
African	16	83562	C	T	0.9221	-0.018665	0.026027	0.473294	16:83562_C_T	PLT	rs2541685
African	16	85065	G	A	0.822603	-0.008228	0.017529	0.638804	16:85065_G_A	PLT	rs3930588
African	16	858094	A	G	0.466745	-0.001037	0.012485	0.933782	16:858094_A_G	PLT	rs72759417
African	16	85932730	C	A	0.940222	0.025138	0.024209	0.299079	16:85932730_C_A	PLT	rs12325654
African	16	99565	G	A	0.985793	0.052377	0.051235	0.306634	16:99565_G_A	PLT	rs150800825
African	17	38028634	G	T	0.615161	-0.01667	0.011928	0.162254	17:38028634_G_T	PLT	rs11557467
African	19	16185559	G	A	0.905847	0.178918	0.020515	2.91e-18	19:16185559_G_A	PLT	rs8109288
African	19	6802571	C	T	0.918357	0.125608	0.022153	1.46e-08	19:6802571_C_T	PLT	rs8106212
African	1	100846956	T	C	0.149583	0.037588	0.021845	0.085307	1:100846956_T_C	PLT	rs565590
African	1	102502084	T	C	0.931021	-0.000583	0.026748	0.982591	1:102502084_T_C	PLT	rs12046299
African	1	103025218	T	C	0.437262	-0.00867	0.011797	0.462398	1:103025218_T_C	PLT	rs1589096
African	1	106081299	A	G	0.483271	0.012413	0.012031	0.302161	1:106081299_A_G	PLT	rs1710774
African	1	107535806	T	A	0.723	0.016162	0.013504	0.231369	1:107535806_T_A	PLT	rs9435338
African	1	109827253	A	G	0.46345	-0.018013	0.012127	0.137429	1:109827253_A_G	PLT	rs672569
African	1	110231777	G	A	0.917505	0.060261	0.035959	0.093776	1:110231777_G_A	PLT	rs4147565
African	1	111100498	G	A	0.823683	0.000126	0.017111	0.994132	1:111100498_G_A	PLT	rs11102131
African	1	111163693	C	T	0.742895	0.020638	0.014035	0.141433	1:111163693_C_T	PLT	rs12132073
African	1	111748488	A	G	0.886401	0.01098	0.021022	0.601476	1:111748488_A_G	PLT	rs2783440
African	1	112320846	T	G	0.413263	-0.0038	0.012251	0.756413	1:112320846_T_G	PLT	rs535183
African	1	112612098	G	A	0.636875	-0.004794	0.012137	0.692848	1:112612098_G_A	PLT	rs269127
African	1	112767483	T	C	0.516603	0.003511	0.012787	0.783624	1:112767483_T_C	PLT	rs56693678
African	1	112824160	C	T	0.90739	-0.001222	0.021874	0.955434	1:112824160_C_T	PLT	rs4073809
African	1	112941134	G	A	0.564302	-0.014465	0.011998	0.227924	1:112941134_G_A	PLT	rs2492508
African	1	113022434	A	G	0.525362	0.010089	0.011853	0.394673	1:113022434_A_G	PLT	rs10857956
African	1	113085721	A	C	0.191103	-0.014912	0.017662	0.398506	1:113085721_A_C	PLT	rs4838959
African	1	113344299	G	A	0.472014	-0.005474	0.012236	0.654601	1:113344299_G_A	PLT	rs10745336
African	1	113874773	T	G	0.953009	0.0096	0.030921	0.756224	1:113874773_T_G	PLT	rs1935746
African	1	114078037	A	G	0.63545	-0.00994	0.012673	0.432832	1:114078037_A_G	PLT	rs12026423
African	1	114671733	C	A	0.907279	0.003602	0.020252	0.858829	1:114671733_C_A	PLT	rs79356431
African	1	114681932	T	C	0.086942	-0.015609	0.038668	0.686468	1:114681932_T_C	PLT	rs2629808
African	1	115618547	T	C	0.940949	0.041847	0.027486	0.127877	1:115618547_T_C	PLT	rs4839022
African	1	115734289	G	A	0.750822	-0.020021	0.014018	0.153207	1:115734289_G_A	PLT	rs195203
African	1	116083584	C	T	0.689431	-0.015942	0.012565	0.204492	1:116083584_C_T	PLT	rs6672158
African	1	116416579	C	T	0.926429	-0.01365	0.025149	0.587305	1:116416579_C_T	PLT	rs10923690
African	1	116724459	A	G	0.535221	-0.015458	0.011693	0.186138	1:116724459_A_G	PLT	rs911221
African	1	116886547	G	T	0.525766	0.000527	0.011962	0.964857	1:116886547_G_T	PLT	rs6701849
African	1	116923792	A	G	0.423892	-0.024151	0.012118	0.046275	1:116923792_A_G	PLT	rs6428896
African	1	117554421	A	G	0.911435	0.016759	0.022724	0.460832	1:117554421_A_G	PLT	rs3754112
African	1	117728652	A	G	0.712003	0.005258	0.013429	0.695416	1:117728652_A_G	PLT	rs10047089
African	1	117771515	C	T	0.432302	0.016244	0.011929	0.173287	1:117771515_C_T	PLT	rs10754343
African	1	117793269	T	A	0.407305	-0.006221	0.012773	0.626269	1:117793269_T_A	PLT	rs6428700
African	1	118126591	C	T	0.277568	-0.021718	0.014775	0.141575	1:118126591_C_T	PLT	rs861152
African	1	118282130	A	C	0.845939	0.010836	0.016861	0.520474	1:118282130_A_C	PLT	rs12137791
African	1	119054510	T	A	0.850686	-8.8e-05	0.017601	0.995988	1:119054510_T_A	PLT	rs7519196
African	1	119992162	C	G	0.823798	0.018012	0.016731	0.281643	1:119992162_C_G	PLT	rs12039340
African	1	120021503	T	G	0.516194	-0.007629	0.011789	0.517572	1:120021503_T_G	PLT	rs74525369
African	1	121153366	G	C	0.826683	-0.028212	0.019567	0.14934	1:121153366_G_C	PLT	rs2003134
African	1	121429112	C	G	0.344725	0.005032	0.019374	0.79508	1:121429112_C_G	PLT	rs200129125
African	1	143396820	T	C	0.076459	-0.047203	0.04918	0.337153	1:143396820_T_C	PLT	rs3105533
African	1	143734242	C	T	0.884536	0.006505	0.037898	0.863697	1:143734242_C_T	PLT	rs12132106
African	1	145554450	T	C	0.923502	0.074652	0.025086	0.002933	1:145554450_T_C	PLT	rs12125340
African	1	145560476	G	A	0.342527	-0.014221	0.013145	0.279322	1:145560476_G_A	PLT	rs10797650
African	1	146589758	C	T	0.423794	-0.014128	0.012115	0.24353	1:146589758_C_T	PLT	rs750467
African	1	146817245	A	T	0.47885	-0.000528	0.011562	0.963562	1:146817245_A_T	PLT	rs6693667
African	1	147003202	G	T	0.930566	0.029054	0.026092	0.265462	1:147003202_G_T	PLT	rs112530376
African	1	147013836	A	C	0.340813	-0.001338	0.013003	0.918029	1:147013836_A_C	PLT	rs594132
African	1	147056280	C	A	0.600585	0.025801	0.012525	0.039416	1:147056280_C_A	PLT	rs628928
African	1	147220045	C	A	0.944948	0.01022	0.027863	0.713795	1:147220045_C_A	PLT	rs12032789
African	1	147381558	G	A	0.48398	0.021747	0.013272	0.101301	1:147381558_G_A	PLT	rs2132397
African	1	147797417	G	A	0.498015	0.010666	0.012454	0.391746	1:147797417_G_A	PLT	rs2105069
African	1	149868334	C	T	0.528142	-0.025248	0.012376	0.041352	1:149868334_C_T	PLT	rs12062387
African	1	149892872	A	G	0.871272	0.022511	0.019561	0.24979	1:149892872_A_G	PLT	rs11205277
African	1	150047928	T	C	0.378401	0.000313	0.012343	0.979742	1:150047928_T_C	PLT	rs10888571
African	1	150202423	A	G	0.688382	-0.011126	0.012622	0.378028	1:150202423_A_G	PLT	rs11205344
African	1	150244046	G	A	0.718171	-0.014235	0.012995	0.273335	1:150244046_G_A	PLT	rs73011380
African	1	150672262	T	C	0.379002	-0.000503	0.012136	0.966893	1:150672262_T_C	PLT	rs1932864
African	1	151118035	C	G	0.384502	-0.012573	0.012562	0.316847	1:151118035_C_G	PLT	rs11204782
African	1	151343545	T	C	0.856641	0.004517	0.017459	0.795827	1:151343545_T_C	PLT	rs61818027
African	1	151445752	C	T	0.562987	0.011337	0.012411	0.36099	1:151445752_C_T	PLT	rs10888415
African	1	151692483	A	G	0.79577	0.010977	0.015187	0.469802	1:151692483_A_G	PLT	rs6683687
African	1	151737129	A	G	0.764881	-0.037349	0.013554	0.005875	1:151737129_A_G	PLT	rs61186168
African	1	152007599	T	C	0.734491	0.002266	0.01284	0.859921	1:152007599_T_C	PLT	rs3007676
African	1	152161103	T	G	0.370119	0.00973	0.012112	0.421809	1:152161103_T_G	PLT	rs1390489
African	1	152391282	C	A	0.571601	-0.006517	0.011706	0.577764	1:152391282_C_A	PLT	rs4845766
African	1	152552285	C	A	0.818196	-0.004157	0.015227	0.784835	1:152552285_C_A	PLT	rs512208
African	1	152558146	G	A	0.88438	-0.023286	0.019181	0.224722	1:152558146_G_A	PLT	rs76340524
African	1	152779534	A	T	0.845791	0.005663	0.017623	0.747936	1:152779534_A_T	PLT	rs28649970
African	1	152887237	T	C	0.546522	0.004985	0.011762	0.671697	1:152887237_T_C	PLT	rs6587711
African	1	152946894	A	G	0.792634	-0.024877	0.014197	0.079733	1:152946894_A_G	PLT	rs10159262
African	1	153065287	A	C	0.472359	-0.005981	0.012047	0.619602	1:153065287_A_C	PLT	rs3843257
African	1	153143504	C	G	0.556994	0.009791	0.012088	0.417998	1:153143504_C_G	PLT	rs498131
African	1	153200987	C	T	0.862243	0.002675	0.017829	0.880728	1:153200987_C_T	PLT	rs12081567
African	1	153334077	C	A	0.806678	0.017316	0.015541	0.265168	1:153334077_C_A	PLT	rs3014869
African	1	153337943	G	A	0.896238	0.033531	0.020555	0.10284	1:153337943_G_A	PLT	rs3014874
African	1	153390542	G	C	0.616301	-0.012231	0.012988	0.346349	1:153390542_G_C	PLT	rs3006412
African	1	153459023	C	T	0.556781	-0.005211	0.012404	0.674424	1:153459023_C_T	PLT	rs7535089
African	1	153530231	T	A	0.663091	-0.019695	0.01269	0.12065	1:153530231_T_A	PLT	rs28689606
African	1	153630726	T	C	0.692232	0.001049	0.013075	0.936063	1:153630726_T_C	PLT	rs58379041
African	1	154044453	T	C	0.957883	0.00132	0.040477	0.973964	1:154044453_T_C	PLT	rs113462784
African	1	154206358	T	C	0.973676	0.043731	0.040291	0.277743	1:154206358_T_C	PLT	rs12027999
African	1	154292348	G	A	0.244203	0.021826	0.01492	0.143496	1:154292348_G_A	PLT	rs1685606
African	1	154342517	C	T	0.943905	0.068594	0.02983	0.0215	1:154342517_C_T	PLT	rs79438587
African	1	154407419	A	C	0.772218	-0.01086	0.014281	0.446977	1:154407419_A_C	PLT	rs7518199
African	1	154440604	T	C	0.844049	-0.027558	0.016252	0.089953	1:154440604_T_C	PLT	rs41308415
African	1	154665606	T	C	0.962293	-0.007986	0.037875	0.832998	1:154665606_T_C	PLT	rs57541561
African	1	154726546	G	C	0.832541	-0.000437	0.016916	0.979386	1:154726546_G_C	PLT	rs10494300
African	1	154731622	C	T	0.901095	-0.011285	0.021123	0.593209	1:154731622_C_T	PLT	rs12038684
African	1	154763613	G	T	0.910384	0.000965	0.022091	0.965131	1:154763613_G_T	PLT	rs113920303
African	1	154788815	C	T	0.770352	-0.010274	0.014035	0.464183	1:154788815_C_T	PLT	rs59517499
African	1	154822907	C	T	0.726909	0.019982	0.013559	0.140546	1:154822907_C_T	PLT	rs906595
African	1	155008610	A	G	0.269724	-0.003507	0.014161	0.804381	1:155008610_A_G	PLT	rs4845406
African	1	155129499	A	G	0.697631	0.013272	0.012734	0.297304	1:155129499_A_G	PLT	rs150587259
African	1	155682870	C	T	0.315282	-0.002085	0.013324	0.875635	1:155682870_C_T	PLT	rs490608
African	1	156085375	T	C	0.515512	0.003037	0.011853	0.797765	1:156085375_T_C	PLT	rs547915
African	1	156184659	T	G	0.790818	0.000418	0.014215	0.976518	1:156184659_T_G	PLT	rs7530415
African	1	156247481	C	T	0.868401	0.013046	0.017686	0.460748	1:156247481_C_T	PLT	rs10908493
African	1	156361116	G	A	0.86123	-0.018711	0.0169	0.268209	1:156361116_G_A	PLT	rs73010652
African	1	156407051	T	C	0.482014	0.009871	0.012186	0.417953	1:156407051_T_C	PLT	rs6665039
African	1	156484318	C	G	0.306618	0.004693	0.013302	0.724242	1:156484318_C_G	PLT	rs6427312
African	1	156613517	C	A	0.268829	-0.021558	0.014425	0.135034	1:156613517_C_A	PLT	rs4233511
African	1	156619135	A	T	0.261954	-0.006409	0.015064	0.670558	1:156619135_A_T	PLT	rs4233512
African	1	156687576	C	T	0.25352	0.007778	0.01505	0.605318	1:156687576_C_T	PLT	rs4661214
African	1	156819216	T	C	0.86146	0.020053	0.017506	0.251979	1:156819216_T_C	PLT	rs74118779
African	1	156833913	A	G	0.762321	-0.017993	0.014505	0.214779	1:156833913_A_G	PLT	rs74118782
African	1	156838974	C	T	0.79068	-0.032193	0.014836	0.030032	1:156838974_C_T	PLT	rs61813772
African	1	157016710	C	T	0.933822	0.02774	0.024597	0.259395	1:157016710_C_T	PLT	rs11264606
African	1	157069154	A	G	0.508526	0.012479	0.011928	0.295466	1:157069154_A_G	PLT	rs16838075
African	1	157126453	C	G	0.925041	0.03544	0.024484	0.147743	1:157126453_C_G	PLT	rs61799686
African	1	157140430	C	A	0.822871	-0.02832	0.015243	0.063192	1:157140430_C_A	PLT	rs6657979
African	1	157154912	C	G	0.755352	-0.004754	0.014469	0.742515	1:157154912_C_G	PLT	rs74119210
African	1	157275048	C	T	0.957082	0.031282	0.032341	0.333409	1:157275048_C_T	PLT	rs12047109
African	1	157321422	C	T	0.346678	-0.017813	0.013127	0.174792	1:157321422_C_T	PLT	rs9427263
African	1	157341048	A	G	0.810323	-0.026	0.014987	0.082761	1:157341048_A_G	PLT	rs12080330
African	1	157435230	G	A	0.495633	0.020015	0.011967	0.094416	1:157435230_G_A	PLT	rs4111874
African	1	157479006	G	A	0.969782	0.038673	0.049013	0.4301	1:157479006_G_A	PLT	rs4110937
African	1	157485275	T	G	0.590231	-0.014101	0.011778	0.231203	1:157485275_T_G	PLT	rs3811036
African	1	157541674	A	C	0.312838	-0.013317	0.013369	0.319196	1:157541674_A_C	PLT	rs849819
African	1	157820033	T	C	0.895649	0.005553	0.018769	0.76735	1:157820033_T_C	PLT	rs16839297
African	1	157979035	A	G	0.703899	-0.01814	0.012865	0.158494	1:157979035_A_G	PLT	rs6680700
African	1	157991269	G	C	0.698714	-0.00484	0.012632	0.701631	1:157991269_G_C	PLT	rs11264874
African	1	158024742	A	G	0.192391	0.019363	0.01651	0.240851	1:158024742_A_G	PLT	rs7523161
African	1	158032447	T	G	0.18487	-0.008572	0.017754	0.629271	1:158032447_T_G	PLT	rs6677623
African	1	158053170	A	G	0.586133	-0.006779	0.011702	0.562398	1:158053170_A_G	PLT	rs73024667
African	1	158084162	T	C	0.81929	-0.026157	0.015397	0.089346	1:158084162_T_C	PLT	rs57035221
African	1	158108284	T	A	0.607172	-0.015937	0.012183	0.190826	1:158108284_T_A	PLT	rs10908624
African	1	158265973	T	C	0.785689	-0.009148	0.014313	0.52278	1:158265973_T_C	PLT	rs73023953
African	1	158365697	C	T	0.734489	-0.006925	0.013763	0.614899	1:158365697_C_T	PLT	rs12405213
African	1	158398965	C	T	0.973278	0.020259	0.040234	0.614625	1:158398965_C_T	PLT	rs144581779
African	1	158542883	G	A	0.831406	-0.037629	0.015478	0.015074	1:158542883_G_A	PLT	rs55755372
African	1	158618455	G	A	0.867838	0.033379	0.018384	0.069434	1:158618455_G_A	PLT	rs2246434
African	1	158644851	A	G	0.145674	-0.057219	0.019445	0.003266	1:158644851_A_G	PLT	rs703117
African	1	158679507	A	T	0.896704	-0.064151	0.019137	0.000806	1:158679507_A_T	PLT	rs434260
African	1	158701660	A	C	0.946666	-0.004373	0.026573	0.869268	1:158701660_A_C	PLT	rs77800865
African	1	158785094	C	T	0.662917	0.005666	0.012264	0.644078	1:158785094_C_T	PLT	rs857786
African	1	158833656	G	T	0.120722	-0.060467	0.027471	0.027752	1:158833656_G_T	PLT	rs2820126
African	1	158903759	T	G	0.343049	-0.012718	0.016518	0.441314	1:158903759_T_G	PLT	rs1772397
African	1	158907751	A	C	0.958785	0.024347	0.034364	0.478639	1:158907751_A_C	PLT	rs113812917
African	1	158912448	G	A	0.172749	-0.02208	0.01785	0.21608	1:158912448_G_A	PLT	rs856081
African	1	158950333	T	C	0.258815	0.003568	0.013644	0.793686	1:158950333_T_C	PLT	rs856138
African	1	158980645	G	A	0.204422	0.011614	0.015538	0.454817	1:158980645_G_A	PLT	rs864439
African	1	159162922	G	A	0.713371	-0.016727	0.013025	0.199036	1:159162922_G_A	PLT	rs2852717
African	1	159252040	G	T	0.933325	0.0502	0.022972	0.028893	1:159252040_G_T	PLT	rs16841975
African	1	159511202	C	T	0.445019	0.034244	0.011928	0.004108	1:159511202_C_T	PLT	rs4465205
African	1	159608533	T	C	0.815402	-0.013535	0.014838	0.361666	1:159608533_T_C	PLT	rs74122971
African	1	159737983	C	T	0.869034	0.019606	0.018126	0.279394	1:159737983_C_T	PLT	rs10159314
African	1	159768918	C	T	0.947896	-0.013187	0.028339	0.641715	1:159768918_C_T	PLT	rs72700611
African	1	159782360	G	A	0.876314	-0.046381	0.018039	0.010154	1:159782360_G_A	PLT	rs77142732
African	1	159800098	A	G	0.786929	-0.027611	0.014902	0.063916	1:159800098_A_G	PLT	rs41317533
African	1	159815940	G	T	0.129196	-0.01271	0.023992	0.596299	1:159815940_G_T	PLT	rs2501353
African	1	159818817	T	C	0.876516	-0.032409	0.019487	0.096293	1:159818817_T_C	PLT	rs2501345
African	1	159884207	G	C	0.768202	-0.019829	0.014313	0.165923	1:159884207_G_C	PLT	rs12067321
African	1	159927907	T	C	0.745547	-0.012	0.013645	0.379174	1:159927907_T_C	PLT	rs12144158
African	1	160009121	A	C	0.410998	0.002448	0.012278	0.841939	1:160009121_A_C	PLT	rs1053074
African	1	160038698	G	A	0.881542	0.002529	0.01868	0.892284	1:160038698_G_A	PLT	rs80298170
African	1	160125463	T	C	0.790447	-0.038637	0.014749	0.00882	1:160125463_T_C	PLT	rs16831449
African	1	160145688	C	G	0.217106	-0.004311	0.015347	0.778787	1:160145688_C_G	PLT	rs1884996
African	1	160158031	G	A	0.836607	-0.029307	0.016668	0.078705	1:160158031_G_A	PLT	rs76138322
African	1	160162872	A	G	0.846235	0.009363	0.017073	0.583417	1:160162872_A_G	PLT	rs617698
African	1	160206394	G	A	0.730129	0.004181	0.013334	0.753896	1:160206394_G_A	PLT	rs9633341
African	1	160489974	A	G	0.332296	-0.014715	0.012656	0.244923	1:160489974_A_G	PLT	rs3845627
African	1	160651728	A	G	0.740309	0.009859	0.014	0.481297	1:160651728_A_G	PLT	rs16832311
African	1	160666350	A	G	0.332088	-0.006577	0.012976	0.612283	1:160666350_A_G	PLT	rs504716
African	1	160729163	G	C	0.969732	-0.024993	0.039309	0.52492	1:160729163_G_C	PLT	rs11265475
African	1	160736598	T	C	0.278136	-0.002697	0.013493	0.841545	1:160736598_T_C	PLT	rs492484
African	1	160773029	G	A	0.892053	0.018275	0.019648	0.352296	1:160773029_G_A	PLT	rs1961611
African	1	161225699	G	C	0.879535	0.031668	0.019214	0.099318	1:161225699_G_C	PLT	rs543799247
African	1	161475750	G	A	0.966799	-0.009218	0.037068	0.803611	1:161475750_G_A	PLT	rs10494360
African	1	161481546	T	C	0.832403	0.030201	0.016814	0.072486	1:161481546_T_C	PLT	rs114926793
African	1	161567067	T	A	0.538346	0.001899	0.01351	0.888188	1:161567067_T_A	PLT	rs61801824
African	1	161595730	C	A	0.702513	-0.026469	0.015209	0.081804	1:161595730_C_A	PLT	rs143596860
African	1	161698125	C	T	0.899827	0.013445	0.019043	0.480193	1:161698125_C_T	PLT	rs113563530
African	1	161708194	T	G	0.736466	-0.002262	0.013332	0.86526	1:161708194_T_G	PLT	rs10799941
African	1	162061209	C	T	0.694757	-0.032217	0.012565	0.010365	1:162061209_C_T	PLT	rs16851902
African	1	162177803	G	A	0.288704	-0.003246	0.013154	0.805072	1:162177803_G_A	PLT	rs4656359
African	1	162322803	G	A	0.770008	-0.009951	0.01421	0.483736	1:162322803_G_A	PLT	rs1848843
African	1	162335256	C	T	0.596521	0.000247	0.011882	0.983399	1:162335256_C_T	PLT	rs348624
African	1	162367874	G	T	0.965882	-0.041352	0.035513	0.244234	1:162367874_G_T	PLT	rs61809468
African	1	162446878	G	A	0.731923	-0.0062	0.013666	0.650094	1:162446878_G_A	PLT	rs469951
African	1	162606728	T	C	0.713496	0.010714	0.013288	0.420084	1:162606728_T_C	PLT	rs4656375
African	1	162650763	G	A	0.713835	0.000352	0.012842	0.978095	1:162650763_G_A	PLT	rs72709727
African	1	162827240	T	G	0.7997	-0.013686	0.014488	0.344828	1:162827240_T_G	PLT	rs11585029
African	1	162852760	C	T	0.475911	0.011264	0.011683	0.334958	1:162852760_C_T	PLT	rs4657233
African	1	162929447	G	T	0.150166	-0.043041	0.021408	0.04439	1:162929447_G_T	PLT	rs10732281
African	1	162970868	A	T	0.916934	0.009834	0.023341	0.673545	1:162970868_A_T	PLT	rs112616660
African	1	163072899	G	A	0.882474	0.00761	0.018951	0.688032	1:163072899_G_A	PLT	rs2661299
African	1	163123382	G	A	0.853239	0.01283	0.016856	0.446569	1:163123382_G_A	PLT	rs6664123
African	1	163216705	A	G	0.905817	0.036929	0.020836	0.076335	1:163216705_A_G	PLT	rs2814369
African	1	163217392	G	A	0.962694	-0.042996	0.03623	0.235313	1:163217392_G_A	PLT	rs114466359
African	1	163241577	G	A	0.916704	-0.00833	0.021981	0.704741	1:163241577_G_A	PLT	rs61812168
African	1	163345829	C	T	0.876946	0.013462	0.020187	0.504881	1:163345829_C_T	PLT	rs10917739
African	1	163513839	G	A	0.887731	0.059441	0.020858	0.004387	1:163513839_G_A	PLT	rs12067389
African	1	163579955	T	C	0.922495	-0.006795	0.024812	0.784201	1:163579955_T_C	PLT	rs2791149
African	1	163590197	T	C	0.820133	-0.003066	0.015988	0.847918	1:163590197_T_C	PLT	rs7541708
African	1	163855599	C	T	0.580646	0.003588	0.011878	0.762582	1:163855599_C_T	PLT	rs7520589
African	1	164068531	C	T	0.838172	0.021174	0.016627	0.202821	1:164068531_C_T	PLT	rs12139028
African	1	164392501	A	G	0.566994	-0.004101	0.011591	0.723465	1:164392501_A_G	PLT	rs2821398
African	1	164492154	C	T	0.913159	-0.009012	0.022183	0.684576	1:164492154_C_T	PLT	rs12402920
African	1	164540861	A	G	0.494615	0.00845	0.013103	0.519	1:164540861_A_G	PLT	rs200773115
African	1	164609305	T	C	0.371479	0.005761	0.012833	0.653479	1:164609305_T_C	PLT	rs1780349
African	1	164735436	G	T	0.393976	0.01489	0.012333	0.227292	1:164735436_G_T	PLT	rs1780360
African	1	164764500	G	A	0.836821	-0.01246	0.016071	0.438182	1:164764500_G_A	PLT	rs4657375
African	1	164934507	T	G	0.384227	0.007838	0.012229	0.521565	1:164934507_T_G	PLT	rs1361843
African	1	165117049	T	C	0.163353	0.007932	0.018905	0.674815	1:165117049_T_C	PLT	rs4657405
African	1	165189595	G	A	0.964006	-0.042346	0.035351	0.230946	1:165189595_G_A	PLT	rs61800524
African	1	165196183	T	C	0.319274	-0.003318	0.012941	0.797619	1:165196183_T_C	PLT	rs2221418
African	1	165393753	G	T	0.716351	0.006338	0.013245	0.632333	1:165393753_G_T	PLT	rs3753896
African	1	165562982	C	T	0.730956	0.001583	0.013309	0.905317	1:165562982_C_T	PLT	rs1538116
African	1	165605310	A	G	0.225576	0.006976	0.01523	0.646955	1:165605310_A_G	PLT	rs10800120
African	1	165743761	G	C	0.755197	-0.001042	0.014644	0.943245	1:165743761_G_C	PLT	rs61800457
African	1	166640635	T	C	0.62006	-0.001501	0.011798	0.898741	1:166640635_T_C	PLT	rs472293
African	1	166976836	A	G	0.44151	0.002639	0.012238	0.829259	1:166976836_A_G	PLT	rs66805418
African	1	167164887	A	G	0.422328	0.005294	0.01273	0.677519	1:167164887_A_G	PLT	rs3931265
African	1	167420425	T	G	0.863179	0.012827	0.017815	0.471525	1:167420425_T_G	PLT	rs2056626
African	1	167667620	C	T	0.459491	-0.018355	0.012112	0.129672	1:167667620_C_T	PLT	rs13374598
African	1	168355541	C	G	0.260785	-0.01568	0.015418	0.309131	1:168355541_C_G	PLT	rs909638
African	1	172332009	A	G	0.641735	0.014376	0.012693	0.257352	1:172332009_A_G	PLT	rs979935
[truncated: 63,012 more rows]

[truncated: 2 more sheets: Table S11, Table S12]
